# Supplementary material for: Non-methane organic gas emissions from biomass burning:identification, quantification, and emission factors from PTR-ToF during the FIREX 2016 laboratory experiment
Source: Copernicus journal article supplement (doi:10.5194/acp-2017-924), 2017-10-17
Supplement: Supplementary file 1 [file Table S1.xlsx]

## Sheet: Master ID and evidence
PTR-ToF ion masses and identifications										EVIDENCE
Fragments (contribution subtracted from ion signal before calibration) are marked in blue.										strong	3
NMOG contributors without supporting evidence are marked in green. The identification is based on typical NMOG structures observed in biomass burning emissions, and there are few other structural possibilities.										weak	2
										no evidence	1
Exact m/z	Nominal m/z	Formula (without H+)	NMOG contributor	Fractional contribution to ion signal (total fraction of each m/z = 1)	Fire-integrated emission ratio to CO of all NMOG at nominal mass (ppbv NMOG: ppm CO, average over all fuels)	Calibration factor (ncps ion/ ppb NMOG)	Method of calibration	Uncertainty of calibration factor (%)	Notes	Literature evidence: strength	GC-CIMS evidence: strength	Intercomparison evidence: strength	Time series evidence: strength
18.0338	18	NH3	Ammonia	1	17.2169	5.6	from FTIR comparison	15		3	1	3
26.0151	26	C2H2	acetylene	0.568287	5.00457	1.19158	from calibration	15			3	3
26.0151	26	C2H2	fragments	0.431713							3
28.0182	28	HCN	HCN	1	3.87222	10.58	from FTIR comparison	15		3	1	3
28.0308	28	C2H4	ethene	0.874267	7.05148	0.614856	from calibration	15			3	3
28.0308	28	C2H4	fragments	0.125733							3
30.0338	30	CH3N	Methanimine	1	0.00917002	73.5882	calculation Sekimoto et al 2017	50		2	1
31.0178	31	CH2O	Formaldehyde	1	20.0865	6.44	from calibration	15		3	1	3
33.0335	33	CH4O	Methanol	1	11.786	35.75	from calibration	15		3	3	3
34.995	35	H2S	Hydrogen sulfide	1	0.260947	11.153	calculation Sekimoto et al 2017	50		1	1
41.0386	41	C3H4	1,2-Propadiene	0.0394633					A very large percentage of signal on this mass is fragmentary; the remainder is split between several compounds. After subtracting the fragment contribution, we classified this ion as "not identified".	2	2
41.0386	41	C3H5	Fragments of propene	0.336945						1	2
41.0386	41	C3H4	propyne	0.116392						2	2
41.0386	41	C3H5	Other Fragments	0.5072						1	2
42.0338	42	C2H3N	Acetonitrile	1	0.97234	94.81	from calibration	15		3	3
43.0542	43	C3H6	Propene	0.617897	4.51023	17.9261	from calibration	50		3	3	3
43.0542	43	C3H7	General HC fragments	0.382103						1	3
44.0131	44	HNCO	Isocyanic acid	1	4.60367	10.467	from calibration	15		3	1
44.0495	44	C2H5N	Ethenamine	1	0.0524003	52.9226	calculation Sekimoto et al 2017	50		3	1
45.0335	45	C2H4O	Acetaldehyde	1	7.44012	76	from calibration	15		3	1
46.0287	46	CH3NO	Formamide	1	0.0982225	41.057	from calibration	15		2	1
46.0651	46	C2H7N	Ethylamine	0.5	0.00295713	52.6983	calculation Sekimoto et al 2017	50		2	1
46.0651	46	C2H7N	Dimethylamine	0.5						2	1
47.0128	47	CH2O2	Formic acid	1	2.16394	24.7	from calibration	15		3	1
47.0491	47	C2H6O	Ethanol	1	0.564756	1.347	from calibration	15		3	3
48.008	48	HNO2	HONO	1	4.09299	0.3	from FTIR comparison	15	Quantifying on m/z 30 NO+ may be more sensitive.	2	3	3
49.0106	49	CH4S	methane thiol	1	0.133041	57.8609	calculation Sekimoto et al 2017	50		2	3
49.0284	49	CH4O2	methane diol	1	0.00398206	62.9	calculation Sekimoto et al 2017	50		2	2
52.0182	52	C3HN	Propiolonitrile (=propyne nitrile)	1	0.00899227	110.508	calculation Sekimoto et al 2017	50		1	2
53.0386	53	C4H4	1-Buten-3-yne	0.868471	0.35007	49.8851	calculation Sekimoto et al 2017	50		3	3
53.0386	53	C4H4	Fragments	0.131529						1	3
54.0338	54	C3H3N	Acrylonitrile	1	0.159025	115.5	from calibration	15		3	3
55.0178	55	C3H2O	2-propynal	1	0.196712	86.9469	calculation Sekimoto et al 2017	50		1	3
55.0542	55	C4H6	1,3-Butadiene	0.818511	1.83285	45.8693	calculation Sekimoto et al 2017	50		3	3	3
55.0542	55	C4H6	1,2-Butadiene	0.0127957						3	3
55.0542	55	C4H7	Hexadiene fragment	0.0454277						1	3
55.0542	55	C4H7	Other fragments	0.123265						1	3
56.0495	56	C3H5N	Propane nitrile	1	0.0979675	103.5	calculation Sekimoto et al 2017	50		3	3
57.0335	57	C3H4O	Acrolein	1	5.35154	38.734	calculation Sekimoto et al 2017	50		3	3
57.0699	57	C4H8	Butenes	0.594787	1.24409	51.427	calculation Sekimoto et al 2017	100		3	3
57.0699	57	C4H9	General HC	0.339008						1	3
57.0699	57	C4H9	Hexene fragment	0.0662048						2	3
58.0287	58	C2H3NO	Methyl isocyanate	0.5	0.0894847	32.5615	from calibration	15		2	1
58.0287	58	C2H3NO	Hydroxy acetonitrile	0.5						2	1
58.0651	58	C3H7N	Propene amine	1	0.021596	53.5362	calculation Sekimoto et al 2017	50		2	1
59.0128	59	C2H2O2	Glyoxal	1	1.69338	0.5	from ACES comparison	50		2	1	1
59.0491	59	C3H6O	Acetone	0.998333	2.32792	89.21	from calibration	15		3	3
59.0491	59	C3H6O	Propanal	0.00166667						3	3
60.0444	60	C2H5NO	Acetamide	1	0.460771	40.65	from calibration	15		2	1
60.0808	60	C3H9N	Trimethylamine	1	0.0233681	49.2599	calculation Sekimoto et al 2017	50		3	1
61.0284	61	C2H4O2	Acetic acid	0.67	15.2155	54.6625	from calibration (acetic acid), calculation Sekimoto et al. (glycolaldehyde)	15 (calibrated), 50 (calculated), 27 (total)		3	1
61.0284	61	C2H4O2	glycolaldehyde (=hydroxyacetaldehyde)	0.33						3	1
61.0284	61	C2H4O2	Methyl formate	0					Small peak seen in GC, but FTIR comparison suggests it is a negligible contribution.	2	3
61.0648	61	C3H8O	Propanol	1					***majority of intensity from stack burns is likely from peak overlap error with acetic acid.	3	2
62.0237	62	CH3NO2	Nitromethane	1	0.336574	46.2	from calibration	15		2	3
63.0263	63	C2H6S	Dimethyl sulfide	1	0.0117808	59.023	calculation Sekimoto et al 2017	50		3	3
66.0338	66	C4H3N	Cyanoallene isomers	1	0.00203617	111.021	calculation Sekimoto et al 2017	50		1	2
67.0542	67	C5H6	1,3-Cyclopentadiene	0.217259	0.160119	193.182	calculation Sekimoto et al 2017	50		3	2
67.0542	67	C5H7	Isoprene fragment	0.782741						1	2
68.0495	68	C4H5N	Pyrrole	0.571243	0.355086	53.3782	from calibration	15		3	3
68.0495	68	C4H5N	Butene nitrile isomers	0.428757						3	3
68.9971	69	C3O2	Carbon suboxide	1	0.0155902	66.2866	calculation Sekimoto et al 2017	100		3	1
69.0335	69	C4H4O	Furan	1	1.89298	51.9	from calibration	15		3	2
69.0699	69	C5H8	Isoprene	0.630069	1.01823	48.2857	from calibration	15		3	2
69.0699	69	C5H9	Fragments	0.369931						1	2
70.0651	70	C4H7N	Dihydropyrrole	0.389051	0.0757629	65.2491	calculation Sekimoto et al 2017	50		1	3
70.0651	70	C4H7N	Butane nitrile	0.610949						2	3
71.0128	71	C3H2O2	Propiolic acid	1	0.0460195	53.2198	calculation Sekimoto et al 2017	50		1	1
71.0491	71	C4H6O	MVK	0.477962	1.69082	63.601	from calibration	15		3	3
71.0491	71	C4H6O	Methacrolein	0.191017						3	3
71.0491	71	C4H6O	2-Butenal (=crotonaldehyde)	0.331021						3	3
71.0855	71	C5H10	Pentene & methyl butene	0.689772	0.123897	74.014	calculation Sekimoto et al 2017	50		3	3
71.0855	71	C5H11	Fragments	0.310228						3	3
72.0808	72	C4H9N	Butene amine	1	0.00772437	56.7428	calculation Sekimoto et al 2017	50		1	1		2
73.0284	73	C3H4O2	Pyruvaldehyde (=methyl glyoxal)	0.5	1.43324	59.3934	calculation Sekimoto et al 2017	50		3	2	1
73.0284	73	C3H4O2	acrylic acid	0.5						3	1	2
73.0648	73	C4H8O	MEK	0.848618	0.517439	82.4938	from calibration	15		3	3
73.0648	73	C4H8O	Butanal	0.0118155						3	3
73.0648	73	C4H8O	2-Methyl propanal	0.139105						3	3
74.0237	74	C2H3NO2	Nitroethene	1	0.00676533	105.1	calculation Sekimoto et al 2017	50		1	2
75.0441	75	C3H6O2	Methyl acetate	0.345637	2.80699	64.67	calculation Sekimoto et al 2017	50		2	3
75.0441	75	C3H6O2	Ethyl formate	0.141067						3	3
75.0441	75	C3H6O2	Hydroxyacetone	0.5					Relative contribution estimated from FTIR comparison.	2	1	2
76.0393	76	C2H5NO2	Nitroethane or ethane nitrite	1	0.00340005	102.469	calculation Sekimoto et al 2017	50		2	3
78.0008	78	CH3NOS	n-sulfinyl methanamine	1	0.000314137	53.1133	calculation Sekimoto et al 2017	100		1	3
79.0542	79	C6H6	Benzene	0.900421	1.68271	55.2333	from calibration	15		3	3
79.0542	79	C6H6	Ethylbenzene fragment	0.0995792							3
80.0495	80	C5H5N	Pyridine	0.438638	0.127414	92.3319	calculation Sekimoto et al 2017	50		3	3
80.0495	80	C5H5N	Pentadienenitriles	0.561362						1	3
81.0335	81	C5H4O	2,4-Cyclopentadiene-1-one	0.415635	0.610875	73.2963	calculation Sekimoto et al 2017	50		3	2
81.0335	81	C5H4O	2 other HCO isomers	0.584365						1	2
81.0699	81	C6H9	General HC	0.155573						1	3
81.0699	81	C6H9	Monoterpene fragment	0.844427						2	3
82.0651	82	C5H7N	Methyl pyrrole isomers	0.327979	0.0933537	95.4937	calculation Sekimoto et al 2017	50		3	3
82.0651	82	C5H7N	Pentene nitrile isomers	0.672021						3	3
83.0491	83	C5H6O	2-Methyl furan	0.51052	1.50763	56.4277	from calibration	15		3	3
83.0491	83	C5H6O	3-methyl furan	0.0966618						1	3
83.0491	83	C5H6O	General HCO1 + fragments	0.37236						1	3
84.0808	84	C5H9N	Pentanenitriles	1	0.035492	114.9	calculation Sekimoto et al 2017	50		3	3
85.0106	85	C4H4S	Thiophene	1	0.0567511	51.1	calculation Sekimoto et al 2017	50		3	3
85.0284	85	C4H4O2	2-(3H)Furanone	0.810037	1.66438	70.8235	calculation Sekimoto et al 2017	50		3	2
85.0648	85	C5H8O	Cyclopentanone	0.177829	0.522702	74.31	calculation Sekimoto et al 2017	50		3	2
85.0648	85	C5H8O	3-methyl-3-Buten-2-one	0.367337						3	2
85.0648	85	C5H8O	General HCO1	0.454906						3	2
87.0441	87	C4H6O2	2,3-Butanedione	0.873893	2.01986	55.9043	calculation Sekimoto et al 2017	50		3	3
87.0441	87	C4H6O2	methyl acrylate	0.0486732						1	3
87.0441	87	C4H6O2	other HCO2	0.0774342						1	3
87.0804	87	C5H10O	2-methylbutanal + 3-methylbutanal	0.04	0.163894	57.1324	calculation Sekimoto et al 2017	50		3	3
87.0804	87	C5H10O	3-methyl-2-butanone	0.43						3	3
87.0804	87	C5H10O	2-pentanone	0.32						3	3
87.0804	87	C5H10O	3-pentanone	0.21						3	3
89.0233	89	C3H4O3	Pyruvic acid	1	0.0408567	77.3089	calculation Sekimoto et al 2017	50		3	1
89.0597	89	C4H8O2	Methyl propanoate	1	0.338524	58.1	calculation Sekimoto et al 2017	50		3	2
90.055	90	C3H7NO2	Nitropropanes	1	0.00217043	102.586	calculation Sekimoto et al 2017	50		1	1
92.0495	92	C6H5N	Ethylnylpyrrole	1	0.00657116	73.5692	calculation Sekimoto et al 2017	100		1	2
93.0699	93	C7H8	Toluene	1	0.896688	56.06	from calibration	15		3	3
94.0287	94	C5H3NO	2-furancarbonitrile	0.296693	0.0102952	100.985	calculation Sekimoto et al 2017	50		1	3
94.0287	94	C5H3NO	3-furancarbonitrile	0.703307						2	3
94.0651	94	C6H7N	2-methyl pyridine	0.93	0.0746371	79.3	calculation Sekimoto et al 2017	15		3	1
94.0651	94	C6H7N	3-methyl pyridine	0.07						3	1
94.9984	95	C2H6S2	Dimethyl disulfide	1	0.00815731	72.9	calculation Sekimoto et al 2017	100		1	2
95.0491	95	C6H6O	Phenol	1	2.03563	44	from calibration	15		3	1	2
96.0444	96	C5H5NO	4-pyridinol	1	0.0483862	101.2	calculation Sekimoto et al 2017	50		1	1
96.0808	96	C6H9N	2,5-dimethyl pyrrole	0.7	0.0427329	73.8	calculation Sekimoto et al 2017	50		3	2
96.0808	96	C6H9N	1-ethyl pyrrole	0.25						3	2
96.0808	96	C6H9N	other C2-substituted pyrroles	0.05						3	2
97.0284	97	C5H4O2	3-Furfural	0.0422561	2.11289	87.3401	from calibration	15		3	3	2
97.0284	97	C5H4O2	2-Furfural	0.843584						3	3	2
97.0284	97	C5H4O2	General HCO2	0.11416						3	3
97.0648	97	C6H8O	2,5-Dimethyl furan	0.435899	0.828951	55.8	calculation Sekimoto et al 2017	50		3	3
97.0648	97	C6H8O	2-Ethyl furan	0.104842						3	3
97.0648	97	C6H8O	Other C2-substituted furan isomers	0.45926						3	3
98.0964	98	C6H11N	4-methylpentanenitrile	1	0.0128373	114.115	calculation Sekimoto et al 2017	50		3	2
99.0263	99	C5H6S	Methyl thiophenes	1	0.0790472	56.9539	calculation Sekimoto et al 2017	50		3	3
99.0441	99	C5H6O2	2-furanmethanol	0.344382	1.48311	68.4801	calculation Sekimoto et al 2017	50		3	3
99.0441	99	C5H6O2	other HCO2	0.655618						1	3
99.0804	99	C6H10O	Methyl cyclopentanone & cyclohexanone	0.261472	0.085754	92.4	calculation Sekimoto et al 2017	50		3	2
99.0804	99	C6H10O	Other ketones	0.738528						3	2
101.023	101	C4H4O3	Dihydro furandione	1	0.177392	78.1307	calculation Sekimoto et al 2017	50	Very few structural isomers possible. Linear isomers less likely given the preponderance of furan-type structures, PTR insensitivity to dialadehydes, and much smaller ER of other acids.	1	1
101.06	101	C5H8O2	Methyl methacrylate	0.693719	0.514211	65.2315	calculation Sekimoto et al 2017	50		3	3
101.06	101	C5H8O2	General HCO2	0.306281						1	3
101.096	101	C6H12O	Hexanal	0.46897	0.017221	88.7624	calculation Sekimoto et al 2017	50		3	2
101.096	101	C6H12O	Hexanones	0.53103						3	2
103.039	103	C4H6O3	Acetic anhydride	1	0.337834	85.5453	calculation Sekimoto et al 2017	100		3	1
103.054	103	C8H6	Phenylacetylene	1	0.0394535	59.5	calculation Sekimoto et al 2017	50		3	3
104.049	104	C7H5N	Benzonitrile	1	0.0759289	94.9	calculation Sekimoto et al 2017	50		3	2
105.07	105	C8H8	Styrene	1	0.266062	64.4	from calibration	15		3	3
106.065	106	C7H7N	Vinylpyridine	1	0.0104983	76.0529	calculation Sekimoto et al 2017	50		2	1
107.049	107	C7H6O	Benzaldehyde	1	0.263753	81.2	calculation Sekimoto et al 2017	50		3	3
107.086	107	C8H10	Ethyl benzene	0.104809	0.402951	52.2514	from calibration	15		3	3
107.086	107	C8H10	m- and p-Xylenes	0.677225						3	3
107.086	107	C8H10	o-Xylene	0.228674						3	3
108.044	108	C6H5NO	pyridine aldehyde	0.33	0.0182983	75.4	calculation Sekimoto et al 2017	100	Pyridine aldehyde is the most likely compound based on time series analysis.	1	1		2
108.044	108	C6H5NO	Methyl furonitrile	0.33						1	1
108.044	108	C6H5NO	nitrosobenzene	0.33						1	1
108.081	108	C7H9N	dimethyl + ethyl pyridine	0.5	0.027046	89.563	calculation Sekimoto et al 2017	15		2	1
108.081	108	C7H9N	heptyl nitriles	0.5						1	1
109.028	109	C6H4O2	Quinone (=p-Benzoquinone)	1	0.344362	73.3361	calculation Sekimoto et al 2017	50		1	2
109.065	109	C7H8O	2-Methylphenol (=o-cresol)	0.5	1.48223	33.7567	from calibration	15		3	1	3	3
109.065	109	C7H8O	Anisol	0.5						3	1		3
110.096	110	C7H11N	C7 acrylonitrile	0.5	0.0167492	90.9562	calculation Sekimoto et al 2017	50		1	2
110.096	110	C7H11N	C3 alkyl substituted pyrrole	0.5						2	2
111.044	111	C6H6O2	5-Methyl furfural	0.5	2.38677	48.0748	from calibration	15		3	2
111.044	111	C6H6O2	Benzene diols (=catechol, resorcinol)	0.5						3	2
111.08	111	C7H10O	C3 Furan	0.551904	0.298843	62.5796	calculation Sekimoto et al 2017	50		3	3
111.08	111	C7H10O	Various HCO	0.448096						3	3
112.039	112	C5H5NO2	Dihydroxy pyridine	0.5	0.0211046	102.782	calculation Sekimoto et al 2017	50		1	1		3
112.039	112	C5H5NO2	Methyl maleimide	0.5						1	1		3
113.023	113	C5H4O3	5-Hydroxy 2-furfural/2-furoic acid	1	0.318856	78.7425	calculation Sekimoto et al 2017	100		1	1		1
113.06	113	C6H8O2	2-hydroxy-3-methyl-2-cyclopenten-1-one	1	0.670944	70.266	calculation Sekimoto et al 2017	50		3	1
113.096	113	C7H12O	Ethylcyclopentanone	1	0.0355193	91.5299	calculation Sekimoto et al 2017	50		3	1
114.019	114	C4H3NO3	Nitrofuran	1	0.00370838	73.2	calculation Sekimoto et al 2017	100		1	1		2
115.039	115	C5H6O3	5-hydroxymethyl-2[3H]-furanone	0.5	0.632871	78.8302	calculation Sekimoto et al 2017	50		1	1		3
115.075	115	C6H10O2	C6 Diones	0.459001	0.0991427	69.6664	calculation Sekimoto et al 2017	50		3	1		2
115.075	115	C6H10O2	C6 1-DBE esters	0.540999						3	1		2
115.112	115	C7H14O	Heptanone	0.126945	0.0301278	90.4561	calculation Sekimoto et al 2017	50		3	2
115.112	115	C7H14O	Heptanal	0.628867						3	2
115.112	115	C7H14O	2,4-Dimethyl-3-pentanone	0.244188						3	2
117.055	117	C5H8O3	2,5-Dihydroxymethyl dihydrofurfural	1	0.432539	78.9147	calculation Sekimoto et al 2017	100		1	1		2
117.07	117	C9H8	Indene	0.959141	0.0811356	63.2758	calculation Sekimoto et al 2017	50		3	3
117.07	117	C9H8	Propynyl benzene isomer	0.0408587						1	3
117.091	117	C6H12O2	C6 Esters	1	0.0329636	65.42	calculation Sekimoto et al 2017	50		3	2
118.05	118	C4H7NO3	butene nitrates	1	0.0080153	73.5	calculation Sekimoto et al 2017	100		1	1
118.065	118	C8H7N	benzeneacetonitrile	1	0.0319187	107.128	calculation Sekimoto et al 2017	50	No other isomers have been reported in literature (including GC studies).	3	1
119.049	119	C8H6O	Benzofuran	1	0.11616	57.2	calculation Sekimoto et al 2017	50		3	3
119.086	119	C9H10	Indane	0.132822	0.123719	63.0349	calculation Sekimoto et al 2017	50		3	3
119.086	119	C9H10	Methyl styrenes	0.840554						3	3
119.086	119	C9H10	Propenyl benzenes	0.0262747						3	3
120.081	120	C8H9N	Dihydro pyridine	1	0.00488021	77.4328	calculation Sekimoto et al 2017	50		2	1
121.065	121	C8H8O	Tolualdehyde	1	0.339498	91.8453	calculation Sekimoto et al 2017	50		3	2
121.101	121	C9H12	C9 Aromatics	1	0.1499	60.79	from calibration	15		3	3
123.044	123	C7H6O2	2-hydroxybenzaldehyde (=Salicylaldehyde)	1	0.211931	91.4569	calculation Sekimoto et al 2017	50		3	1
123.08	123	C8H10O	C2 Phenols	0.5	0.367997	66.3302	calculation Sekimoto et al 2017	50		3	1		3
123.08	123	C8H10O	Methyl anisol	0.5						3	1		3
124.039	124	C6H5NO2	Nitrobenzene	1	0.018878	59.2	from calibration	15		1	1		2
125.023	125	C6H4O3	Hydroxy benzoquinone	1	0.179401	79.2266	calculation Sekimoto et al 2017	50		1	1		3
125.06	125	C7H8O2	Guaiacol (=2-methoxyphenol)	1	1.2546	56.7	from calibration	15		3	1
126.128	126	C8H15N	C8 nitriles	1	0.00150402	116.75	calculation Sekimoto et al 2017	50		1	1		1
126.97	127	C2H6S3	Dimethyl trisulfide	1	0.00242222	76	calculation Sekimoto et al 2017	50		1	1
127.039	127	C6H6O3	5-(hydroxymethyl)-2-furfural	1	0.877961	79.2995	calculation Sekimoto et al 2017	50		3	1
129.055	129	C6H8O3	2,5-di(hydroxymethyl)furan	0.5	0.387961	79.3708	calculation Sekimoto et al 2017	50		1	1		1
129.055	129	C6H8O3	Methyl hydroxy dihydrofurfural	0.5						1	1		1
129.07	129	C10H8	Naphthalene	1	0.200712	64	calculation Sekimoto et al 2017	50		3	1
131.086	131	C10H10	Dihydronaphthalene	1	0.0776137	66.5406	calculation Sekimoto et al 2017	50		3	1
132.081	132	C9H9N	Methyl benzeneacetonitrile	1	0.0140634	117.24	calculation Sekimoto et al 2017	50		1	1		2
133.065	133	C9H8O	Methyl benzofuran	1	0.193046	64.1973	calculation Sekimoto et al 2017	50		3	1
133.101	133	C10H12	Methyl propenyl benzene	0.5	0.0860525	66.9939	calculation Sekimoto et al 2017	50		3	1
133.101	133	C10H12	Ethyl styrene	0.5						3	1
135.08	135	C9H10O	3-methylacetophenone	1	0.10753	92.3286	calculation Sekimoto et al 2017	50		3	1
135.117	135	C10H14	C10 Aromatics	0.917272	0.109136	58.4858	from calibration	15		3	3
135.117	135	C10H15	Fragments	0.0827275						1	3
137.06	137	C8H8O2	Methyl benzoic acid	1	0.21542	67.3	calculation Sekimoto et al 2017	100		1	1		2
137.132	137	C10H16	Monoterpenes	1	2.67427	13.9	calculation Sekimoto et al 2017	50		3	3
138.055	138	C7H7NO2	nitrotoluene	1	0.0185697	108.8	calculation Sekimoto et al 2017	50		1	1		2
139.075	139	C8H10O2	2-Methoxy-4-methylphenol (= creosol)	1	0.771544	56.7	from calibration	15		3	1		3
143.086	143	C11H10	Methyl naphthalene	1	0.0797128	68.4	calculation Sekimoto et al 2017	50		3	3
145.05	145	C6H8O4	Product of levoglucosan dehydration (pyrolysis)	1	0.346988	80.9828	calculation Sekimoto et al 2017	100		2	1		2
145.065	145	C10H8O	2-ethenyl benzofuran	1	0.0500442	66.769	calculation Sekimoto et al 2017	50		3	1
145.101	145	C11H12	ethylindene	1	0.0366388	69.6511	calculation Sekimoto et al 2017	100		3	1
147.08	147	C10H10O	dimethylbenzofuran	1	0.102699	67.1883	calculation Sekimoto et al 2017	50		3	2
149.096	149	C10H12O	Methyl chavicol (estragole)	1	0.0685073	69.8208	calculation Sekimoto et al 2017	50		3	2
149.132	149	C11H16	C11 aromatics	1	0.0255447	70.5144	calculation Sekimoto et al 2017	50		3	3
151.075	151	C9H10O2	Vinyl guaiacol	1	0.34652	76.2228	calculation Sekimoto et al 2017	50		3	1
153.055	153	C8H8O3	Vanillin	1	0.368092	39.7	from calibration	15		3	1	3
153.07	153	C12H8	Acenaphthylene	1	0.0245024	71.3672	calculation Sekimoto et al 2017	50		3	1
153.127	153	C10H16O	Camphor	0.299262	0.0697689	81.8632	calculation Sekimoto et al 2017	50		1	2
153.127	153	C10H16O	Oxygenated monoterpenes	0.700738						1	2
155.07	155	C8H10O3	syringol	1	0.124139	80.7206	calculation Sekimoto et al 2017	50		3	1
155.143	155	C10H18O	Cineole	1	0.0133302	71	calculation Sekimoto et al 2017	100		1	2
155.143	155	C10H18O	Other oxygenated monoterpenes	0						1	2
157.101	157	C12H12	1,3-dimethylnaphthalene	1	0.0513466	72.2098	calculation Sekimoto et al 2017	100		3	1
157.159	157	C10H20O	decanal	1	0.00514704	93.4	calculation Sekimoto et al 2017	50		3	1
163.148	163	C12H18	C12 aromatics	1	0.0131292	73.4555	calculation Sekimoto et al 2017	50		3	3
165.091	165	C10H12O2	Eugenol + isoeugenol	1	0.223502	78.5413	calculation Sekimoto et al 2017	50		3	1		3
177.164	177	C13H20	C13 aromatics	1	0.00939534	76.2826	calculation Sekimoto et al 2017	50		3	1		3
205.195	205	C15H24	Sesquiterpenes	1	0.146707	22	calculation Sekimoto et al 2017	50		3	3
Fragments, clusters, and compounds with large error from neighboring peak overlap
39.0229	39	C3H3	Fragment (exclude)
43.018	43	C2H2OH	Fragment of acetic acid (exclude)
45.0699	45	C3H9	Peak fit error (exclude)
51.0229	51	C4H2	Fragment of isoprene (exclude)
59.0855	59	C4H10H	Peak fit error (exclude)
60.0444	60	C2H3NO	Fragment (exclude)
72.0444	72	C3H5NO	Acrylonitrile water cluster (+Ethyl isocyanate)						cluster with acrylonitrile @5% of acryonitrile signal can account for all of stack burn intensity.
72.0444	72	C3H5NO	Acrylonitrile water cluster (+Methoxyacetonitrile)
72.0444	72	C3H5NO	Acrylonitrile water cluster (+Acrylamide)
79.039	79	C2H6O3H	Peak fit error (exclude)
91.0754	91	C4H10O2	MEK water cluster (Butane diol)						interference from MEK water cluster at 5% of m73 signal accounts for all of stack burn intensity.
105.055	105	C4H8O3H	Fragment (exclude)
105.091	105	C5H12O2H	Fragment (exclude)
86.06	86	C4H7NO	C4H5N water cluster (+methacrylamide)						Large interference from water clusters of butene nitriles at 14% of m68 signal. This may be recoverable, but challenging.
86.06	86	C4H7NO	C4H5N water cluster (+propyl isocyanate)
86.06	86	C4H7NO	C4H5N water cluster (+C4 hydroxy nitrile)
Ion masses determined from GC-CIMS to be non-specific
65.0386	65	C5H4	many contributions: general HC
83.0855	83	C6H11	many contributions: general HC
95.0855	95	C7H11	many contributions: general HC
97.1012	97	C7H13	many contributions: general HC

## Sheet: Fuel Specific Emission Ratios
Fire-integrated emission ratios to CO by specific fuel type									*"Contaminated" refers to chaparral fuels collected from a heavily polluted site near San Dimas, CA
			Emission ratios to CO (ppbv NMOG/ppmv CO)						*"Uncontaminated" refers to chaparral fuels collected from a cleaner site in North Mountain, CA
			Ponderosa Pine		Lodgepole pine		Douglas Fir		Subalpine Fir		Engelmann Spruce		Loblolly Pine		Jeffrey Pine		Juniper		Sage		Manzanita, "uncontaminated"*		Manzanita, "contaminated"*		Chamise, "uncontaminated"*		Chamise, "contaminated"*		Ceanothus		Bear Grass		Rice Straw		Peat		Dung		Excelsior		Building Material
Exact m/z (Th)	Ion formula	NMOG identity	Average ER	Standard deviation	Average ER	Standard deviation	Average ER	Standard deviation	Average ER	Standard deviation	Average ER	Standard deviation	Average ER	Standard deviation	Average ER	Standard deviation	Average ER	Standard deviation	Average ER	Standard deviation	Average ER	Standard deviation	Average ER	Standard deviation	Average ER	Standard deviation	Average ER	Standard deviation	Average ER	Standard deviation	Average ER	Standard deviation	Average ER	Standard deviation	Average ER	Standard deviation	Average ER	Standard deviation	Average ER	Standard deviation	Average ER	Standard deviation
18.0338	NH4	ammonia	14.7253	7.51719	15.2841	3.66239	10.5052	5.20028	26.6852	26.1355	23.8698	10.8744	7.71376	0.893624	18.3047	(single sample)	14.6306	4.11685	15.5516	5.41299	18.3508	2.60096	23.6038	0.405588	14.7521	2.32524	10.6042	1.26066	27.6752	5.95203	21.3268	(single sample)	14.519	(single sample)	11.2708	(single sample)	75.2779	(single sample)	5.3249	0.289172	4.44362	(single sample)
26.0151	C2H2	acetylene (fragments on this mass subtracted)	5.11818	1.94682	6.02991	2.65049	4.85252	3.21331	7.06371	1.99105	3.36011	1.04716	2.67731	0.0017019	4.37398		7.51541	1.04436	5.36394	2.17448	3.37056	0.937575	3.83916	0.350164	2.85748	0.21363	2.6444	0.559116	3.76674	1.17265	10.7547		8.53415		2.53018		10.4857		3.95206	0.956532	1.62183
28.0182	HCNH	HCN	3.64004	1.95107	3.8965	0.635634	3.47811	2.41209	5.33341	4.96635	4.21928	1.81509	1.96759	0.072576	6.18144		4.50229	0.883461	3.70612	2.1526	1.67524	0.58121	2.08121	0.0366668	1.73763	0.255018	1.49869	0.195474	3.53814	2.16761	3.90779		3.61818		15.2906		20.59		0.304928	0.0460584	0.336647
28.0308	C2H4	ethene (fragments on this mass subtracted)	7.26334	2.86178	9.61198	3.56281	7.39507	4.88153	10.6486	2.55158	3.57317	2.24458	2.46831	0.389694	6.25645		12.7679	2.2468	8.13044	3.64708	4.71789	1.12071	5.22571	0.00818236	3.54238	0.615448	3.47948	1.2003	6.26308	1.88196	16.04		8.29847		2.6488		6.94656		4.69922	1.6598	2.7019
30.0338	CH3NH	Methanimine	0.00551156	0.00650295	0.0107997	0.00864388	0.0101546	0.012646	0.0109211	0.0133749	0.0059817	0.0103606	0.000769068	0.00108763	0.00238882		0.0195287	0.01095	0.026152	0.0258538	0.00173208	0.000786862	0.00365471	0.00246998	0.0123693	0.0122852	0.00273928	0.00351029	0.00999294	0.000583924	0.0182389		0.0197852		0.000234783		0.0636201		0.00197795	0.000807213	0
31.0178	CH2OH	Formaldehyde	23.0387	5.81312	24.1177	7.05927	21.7768	8.56697	18.9604	6.82831	15.8775	4.56435	12.7674	2.99574	19.3461		20.9045	1.22125	17.0971	5.12328	14.1375	3.68269	15.0335	0.746498	11.5991	1.30366	9.06112	2.74873	12.2839	1.30529	45.5296		54.6809		6.32764		28.5105		29.5782	11.8338	5.8886
33.0335	CH4OH	Methanol	13.441	3.62495	10.6727	3.6994	10.0231	3.92125	15.7009	7.49899	10.6868	3.15983	8.94908	0.801009	15.2034		9.48608	0.933009	10.1459	1.0862	9.47977	1.34112	8.54734	0.490378	6.03031	1.34633	4.33627	0.623301	9.14174	2.47078	32.0517		23.8533		10.1918		20.7866		16.5027	8.86672	3.34852
34.995	H3S	H2S	0.138576	0.0964071	0.161638	0.0501927	0.145648	0.117111	0.830729	1.20692	0.24562	0.235871	0.102436	0.0119267	0.303505		0.175577	6.27818e-05	0.116351	0.061744	0.101983	0.0448668	0.105017	0.00937574	0.0498723	0.0079915	0.0415083	0.00666542	0.132039	0.113896	0.322271		0.383348		0.876554		2.20643		0.0176051	0.00428844	0.00312867
41.0386	C3H5	Propadiene, propyne (unknown)	0.660312	0.358749	0.798573	0.229393	0.454874	0.42399	2.2548	3.3186	1.64276	1.17017	0.413681	0.105321	1.39664		0.686108	0.111888	0.831276	0.401046	0.373117	0.0879683	0.460492	0.0337852	0.388298	0.11333	0.222244	0.0274757	0.807308	0.349228	1.28307		1.71702		2.79269		6.07549		0.222038	0.0771929	0.0119456
42.0338	C2H3NH	Acetonitrile	4.5189	1.77375	5.46239	2.21932	3.85258	2.5739	7.75071	4.39595	3.90608	1.11229	3.07038	0.0916144	4.39387		5.98433	0.677668	4.73525	2.24538	2.60418	0.68096	2.86281	0.383145	1.47532	0.381313	1.03804	0.16362	2.7147	0.853922	8.96385		8.352		4.30398		11.6368		3.29192	1.16514	0.735391
43.0542	C3H6H	propene (fragments on this mass subtracted)	5.07542	2.9814	5.04307	1.71537	3.84417	2.59757	4.49088	1.40053	3.1162	0.846207	1.43665	0.0691538	2.75814		6.72628	1.86467	10.7224	2.31541	4.26009	0.208468	4.46875	0.238588	6.57897	0.604691	5.06431	0.416712	6.16049	1.98474	8.19119		3.00093		1.56397		7.92153		0.977667	0.0129775	1.17863
44.0131	HNCOH	Isocyanic acid	0.0426435	0.0268546	0.0530241	0.021902	0.0500029	0.0404434	0.0790401	0.0547537	0.0568071	0.0209782	0.0143706	0.0101796	0.0350337		0.0627454	0.0113045	0.112289	0.0585254	0.0113626	0.00168894	0.0153898	0.00135686	0.0166471	0.0135837	0.00834545	0.00800353	0.0481039	0.0213941	0.141466		0.199982		0.0141017		0.302716		0.0199895	0.00389568	0.00675268
44.0495	C2H5NH	Etheneamine	7.2351	1.99063	7.92301	2.29678	5.49555	3.16037	11.4385	7.19262	7.26247	2.04277	4.89417	0.115196	9.93958		7.04903	0.683777	6.49596	2.23982	3.84109	0.806809	4.34876	0.224122	2.62215	0.493007	1.88182	0.123966	4.79233	1.62883	17.3992		26.8876		4.36359		22.1822		9.07202	3.14628	1.85482
45.0335	C2H4OH	Acetaldehyde	0.0716548	0.0331674	0.0971759	0.032027	0.0676635	0.0409784	0.202721	0.253283	0.145161	0.103081	0.0476011	0.000636873	0.11762		0.0834194	0.0115853	0.0889958	0.046773	0.0310668	0.00924211	0.0375609	0.00370584	0.0333606	0.00818158	0.0239048	0.00452088	0.0807617	0.0471117	0.165498		0.280654		0.113417		0.56688		0.0243238	0.00684579	0.0166644
46.0287	CH3NOH	Formamide	0.00105161	0.00121913	0.00207658	0.00160593	0.00143099	0.00109222	0.00590771	0.00811366	0.00230338	0.00367708	0.000725641	0.00102621	0.0051488		0.000478364	7.02568e-05	0.00146919	0.000123724	3.19485e-05	2.91284e-06	0.000180803	0.000255694	0.000640919	0.000958554	0.000300568	0.000449546	0.00101721	0.000545561	0.00620959		0.00810635		0.00302526		0.0567409		0.00149664	0.000505099	0.000564986
46.0651	C2H7NH	Ethylamine	2.86296	1.38971	2.25403	0.976176	2.41069	0.832112	2.32888	0.97608	1.30942	0.413645	0.74035	0.0141011	2.9533		1.95189	0.100386	1.11313	0.340943	1.63711	0.599389	1.82414	0.407055	0.783186	0.135374	0.708498	0.237164	1.63881	1.03442	6.79754		6.26695		0.969078		2.90922		1.71214	0.573087	0.854856
47.0128	CH2O2H	Formic acid	0.336618	0.244797	0.511681	0.277603	0.404631	0.322236	1.51553	2.34454	0.594228	0.450277	0.148007	0.141316	0.639278		0.447013	0.0246986	0.352696	0.198419	0.0171245	0.0242177	0	0	0.0716352	0.124076	0.157724	0.0750211	1.83463	1.96785	1.42219		1.12466		0.856599		0.826751		0.489885	0.199421	0.143493
47.0491	C2H6OH	ethanol	4.2704	1.61512	4.89912	1.48281	4.08559	2.55727	4.66061	1.20709	2.66754	1.49356	1.58838	0.0124015	1.50812		5.86246	0.207892	3.53357	0.698666	5.58112	0.639744	6.70735	1.78532	4.34564	0.878015	3.72196	0.607418	4.74044	1.62268	4.63424		3.35981		0.697615		4.67685		1.69403	0.0281259	1.8134
48.008	HNO2H	HONO	0.0735163	0.055559	0.0904808	0.0425001	0.0627877	0.0446259	0.41753	0.616372	0.144331	0.125613	0.0603096	0.00854974	0.201587		0.070489	0.00673577	0.0632242	0.0273983	0.0369516	0.0133234	0.0389878	0.000702019	0.0162562	0.0047846	0.0103718	0.00131681	0.0659891	0.0606066	0.206162		0.289106		0.191255		1.2785		0.0121537	0.00404087	0.00277295
49.0106	CH4SH	methane thiol	0.00424507	0.00211787	0.00476839	0.00198765	0.00413435	0.00201501	0.00422706	0.00222259	0.00190849	0.001826	0.0019087	0.000685441	0.00541601		0.00439274	0.000336947	0.0035451	0.0011107	0.00163335	0.00041597	0.0016823	0.000268191	0.00197076	6.81065e-05	0.00174516	0.000184521	0.00256958	0.000369062	0.0110184		0.0154632		0.00200887		0.00496139		0.00736497	0.00302027	0.00171387
49.0284	CH4O2H	Methanediol	0.0101818	0.00696584	0.0106808	0.00515813	0.0119482	0.0113912	0.00935824	0.00623988	0.00505976	0.00227588	0.00170086	0.000131023	0.00311513		0.0175165	0.00180366	0.0148358	0.00670257	0.00607935	0.00225721	0.00814118	0.00061164	0.0068032	0.000330477	0.00613227	0.00102594	0.0135558	0.00953425	0.0138375		0.00409793		0.00387283		0.0218377		0.00069493	4.64625e-05	0.00104778
52.0182	C3HNH	Propiolonitrile (=propyne nitrile)	0.401804	0.139319	0.410408	0.195173	0.396629	0.285915	0.436481	0.244464	0.194942	0.0803818	0.19235	0.00979151	0.280969		0.473518	0.0799155	0.367352	0.134579	0.262072	0.0928967	0.337572	0.0382872	0.179128	0.00839261	0.147931	0.0240719	0.223707	0.0765233	0.743885		0.707306		0.0754634		0.492171		0.323124	0.0976284	0.126632
53.0386	C4H4H	1-Buten-3-yne (fragments on this mass subtracted)	0.15364	0.0979003	0.180068	0.0686434	0.18417	0.163546	0.215809	0.107314	0.159773	0.0561797	0.0451375	0.00788352	0.115111		0.270537	0.0373685	0.265451	0.159123	0.0804483	0.0245949	0.106715	0.00238291	0.0794198	0.0095926	0.0613815	0.0144803	0.201323	0.112775	0.236962		0.163853		0.143806		0.614821		0.0186515	0.00200332	0.0111468
54.0338	C3H3NH	acrylonitrile	0.241991	0.0688215	0.241548	0.0790324	0.219981	0.107032	0.233186	0.0857263	0.139509	0.0525867	0.134162	0.0141045	0.301971		0.204676	0.0169541	0.131336	0.0562209	0.115321	0.0329182	0.141732	0.0218776	0.0686843	0.016643	0.0600527	0.0155303	0.124944	0.061938	0.39054		0.446713		0.0729951		0.308877		0.168016	0.0783091	0.0588778
55.0178	C3H2OH	2-propynal	1.925	0.873484	2.36899	1.05705	1.89706	1.45765	3.03611	1.66864	1.36809	0.260021	1.11242	0.0472403	1.53733		2.8562	0.375584	1.85696	0.815335	1.21263	0.355478	1.36689	0.175149	0.681573	0.1413	0.520676	0.106557	1.03524	0.361197	3.30441		2.5063		1.02812		3.51814		1.0872	0.331818	0.326116
55.0542	C4H6H	1,3-butadiene (82%), 1,2-butadiene (1%), other fragments on this mass subtracted	0.0692899	0.0485328	0.082714	0.0282956	0.0767358	0.0702053	0.260734	0.351679	0.130216	0.0959165	0.0377656	0.00516668	0.108765		0.101604	0.0125567	0.109911	0.0682916	0.0328869	0.00897735	0.0419672	0.00423309	0.0257119	0.00533133	0.0166284	0.00377402	0.0778783	0.0491447	0.151368		0.130548		0.11705		0.535772		0.0109448	9.59824e-05	0.00315963
56.0495	C3H5NH	Propanenitrile	6.07382	1.68872	6.50931	2.76115	5.29708	3.04997	6.24261	2.67478	3.74863	1.60801	2.81247	0.0322904	4.21994		6.45783	0.536776	5.46468	1.93461	3.4498	0.820571	3.88678	0.264007	2.59104	0.483762	1.99493	0.334346	3.85822	1.07586	12.7809		16.0152		0.860065		7.53611		6.90967	2.41617	1.50243
57.0335	C3H4OH	Acrolein	1.12099	0.486421	1.4206	0.542565	1.02663	0.709813	2.51936	1.83723	1.26752	0.470436	1.00016	0.0177849	1.57024		1.5119	0.167173	1.12978	0.445946	0.577101	0.159429	0.632848	0.118305	0.34096	0.0958173	0.238818	0.0412301	0.629356	0.248734	2.2361		1.8153		2.01219		3.92812		0.669707	0.225547	0.164459
57.0699	C4H9	butenes (59%), general hydrocarbon (34%), other fragments on this mass subtracted	0.0768834	0.0320569	0.0921539	0.0274159	0.0660137	0.0329802	0.144039	0.136281	0.0993001	0.0415315	0.0510639	0.00169749	0.118154		0.0778477	0.00692446	0.0991648	0.0390754	0.0346955	0.0068232	0.0434338	0.00492001	0.0382668	0.00723796	0.0258259	0.00370024	0.0632438	0.0289288	0.211212		0.282922		0.0614512		0.502335		0.0428087	0.0192582	0.0130268
58.0287	C2H3NOH	methyl isocyanate 50%, hydroxy acetonitrile 50% (estimate)	0.0148874	0.00976929	0.0153176	0.00614422	0.0132151	0.00894461	0.045625	0.053404	0.0285358	0.0174703	0.00850965	0.00110799	0.0172423		0.0110929	0.000842163	0.0249914	0.0102611	0.00748804	0.00120113	0.0086291	0.000252435	0.00629671	0.00189393	0.00340571	0.000611682	0.0123047	0.00591844	0.0595313		0.0770714		0.00798238		0.203566		0.00428199	0.000791107	0.00166508
58.0651	C3H7NH	Propene amine	2.18303	1.30509	2.92527	1.53561	1.51459	1.335	1.51176	0.789715	3.43143	1.37993	1.13161	0.744067	0.140756		0.913242	0.167693	1.88424	0.0681478	0.91856	0.357733	1.21933	0.745313	0.625222	0.461497	0.773754	0.327053	0.70008	0.363354	2.5305		0.510928		0		0.211314		2.3634	1.92771	0.455571
59.0128	C2H2O2H	glyoxal	2.26426	0.634244	2.22663	0.662339	1.92729	0.930968	4.15557	3.41834	2.24361	0.831486	2.00374	0.158625	3.91058		1.77217	0.156021	2.22426	0.849122	1.42903	0.19039	1.56624	0.0744949	0.766262	0.186465	0.559654	0.0542014	1.49484	0.400711	4.38401		6.20469		2.41988		6.04135		1.94695	0.839965	0.443009
59.0491	C3H6OH	acetone (>99%), propanal (<1%)	0.199181	0.0800264	0.27915	0.139519	0.170961	0.088891	1.36149	2.41654	0.808201	0.733092	0.197196	0.0180096	0.57365		0.151061	0.0153674	0.192518	0.0901419	0.0850331	0.025235	0.10912	0.00829386	0.0729262	0.0227645	0.0419533	0.00420781	0.199549	0.126681	0.539516		1.1914		0.579118		5.50988		0.0711496	0.0327426	0.0408527
60.0444	C2H5NOH	acetamide	0.0117203	0.00913455	0.0139579	0.00938672	0.014357	0.010226	0.0708781	0.111989	0.0245768	0.0205082	0.00671802	0.00306146	0.0266895		0.0073535	0.000617397	0.0150708	0.00460156	0.005034	0.00240424	0.00445292	0.000667461	0.00352485	0.00235917	0.00153696	0.000838606	0.00741402	0.00427672	0.0394959		0.0830924		0.013581		0.262726		0.00241199	0.000993841	0.001268
60.0808	C3H9NH	trimethyl amine, other C3 amines	14.6857	3.12272	13.7355	4.86082	11.2447	5.3145	20.0571	11.3752	9.14299	3.04584	10.3446	0.0216595	16.4979		11.6077	2.04349	12.8343	2.23843	10.9701	2.46789	12.3571	3.19685	7.48574	1.46775	5.71295	0.585288	13.2932	5.16339	69.9609		52.9827		7.65777		35.5308		22.6934	10.8852	5.33879
60.9743	COSH	unknown	0.398757	0.162181	0.463556	0.159333	0.528262	0.325371	0.319189	0.237257	0.245359	0.189577	0.1463	0.0249412	0.155834		0.545272	0.0214586	0.26725	0.104084	0.322333	0.0852862	0.370363	0.135646	0.193365	0.040398	0.168801	0.0465012	0.330607	0.157566	0.388074		0.28371		0.0418462		0.401613		0.0375744	0.00372709	0.0898173
61.0284	C2H4O2H	acetic acid (67%), glycolaldehyde (33%) (estimate)	0.00755742	0.00665014	0.00956336	0.00451811	0.00661256	0.00450078	0.0211048	0.0231916	0.0150365	0.00951966	0.00686959	0.00100851	0.0173414		0.00653555	0.00039323	0.00658115	0.00228075	0.00638587	0.00143473	0.00787502	0.00010702	0.00251821	0.000652324	0.00227186	0.000378072	0.00645971	0.00452444	0.0232798		0.0191866		0.0430827		0.118372		0.00205898	0.000246446	0.000632657
62.0237	CH3NO2H	nitromethane	0.00223865	0.00160444	0.00252893	0.0013027	0.00292492	0.00283107	0.0024452	0.00194174	0.00105575	0.000531171	0.00044703	3.85253e-05	0.000784834		0.00410003	0.000344982	0.00308019	0.00205281	0.00131873	0.00048928	0.00176194	0.000233329	0.00112013	0.000123972	0.000910196	0.000256397	0.00255694	0.00179389	0.00329654		0.00130585		0.000412839		0.0049025		0.00034702	9.58036e-05	0.000301607
63.0263	C2H6SH	Dimethyl sulfide	0.190237	0.12375	0.205202	0.124623	0.224777	0.214662	0.25723	0.169772	0.083602	0.0251373	0.0720311	0.00292235	0.100649		0.253003	0.0441958	0.149122	0.0923811	0.0987254	0.0379119	0.127124	0.0288291	0.0469921	0.00678215	0.0396238	0.00862472	0.0771271	0.0326811	0.244711		0.157095		0.0469455		0.225873		0.0702573	0.019471	0.030566
63.9852	HNOSH	unknown	0.282844	0.210317	0.302685	0.13644	0.27914	0.26696	0.860958	1.02463	0.365061	0.21539	0.14472	0.0313744	0.260457		0.354374	0.0466412	0.417258	0.222029	0.148817	0.0438202	0.189867	0.0175669	0.116255	0.0257039	0.0713917	0.0126215	0.387512	0.189604	0.589204		0.724978		0.155585		1.98335		0.0690619	0.00933811	0.0219305
66.0338	C4H3NH	3-butynenitrile, 2-butynenitrile, cyanoallene	0.0195486	0.00840175	0.0241151	0.00516648	0.0192518	0.0131356	0.0160001	0.00906157	0.0141662	0.0109103	0.00653833	0.0032666	0.00695408		0.0193558	0.00151209	0.0156721	0.00571767	0.0140487	0.0025126	0.0168546	0.00606899	0.00864507	0.00307605	0.00901515	0.00232836	0.0149421	0.00872576	0.0226452		0		0.00226367		0.00313856		0.00434866	0.00382829	0.00920637
67.0542	C5H6H	1,3-cyclopentadiene (22%), isoprene fragment subtracted (78%)	2.2658	0.675765	2.00508	0.574995	1.67137	0.639844	2.0136	0.927174	1.72386	0.646145	1.80644	0.269809	3.5362		1.08754	0.0604338	1.14151	0.267517	1.06868	0.249438	1.26218	0.13968	0.741177	0.163004	0.57196	0.0568637	0.991941	0.214906	4.1647		6.63003		0.836022		3.57543		2.8678	1.12991	0.522095
68.0495	C4H5NH	butenenitrile isomers (43%), pyrrole (57%)	0.992105	0.673468	1.24455	0.499849	1.07146	0.881659	2.00827	1.33811	0.705932	0.189527	0.937165	0.0185685	0.919375		2.03708	0.450362	0.738712	0.405151	0.530893	0.212553	0.602272	0.0988031	0.309831	0.0851928	0.230165	0.0482571	0.368219	0.182949	1.54847		1.03571		0.864554		2.78626		0.352683	0.0839504	0.0801704
68.9971	C3O2H	carbon suboxide	0.0544542	0.0384883	0.0595841	0.021494	0.0495024	0.0417984	0.197777	0.279267	0.111279	0.07878	0.0297633	0.00366547	0.0715657		0.0579944	0.00968279	0.10528	0.0383044	0.0230284	0.0068764	0.0289045	0.000122784	0.0229002	0.00560045	0.0119223	0.00164379	0.0567896	0.0329159	0.132749		0.13958		0.0691869		0.4895		0.00807479	0.000551567	0.0012064
69.0335	C4H4OH	furan	0.0533499	0.0173854	0.0655589	0.0262627	0.0465408	0.0227123	0.0572977	0.0208453	0.0436958	0.0197042	0.0365414	0.00953387	0.0864733		0.0357239	0.00122804	0.0347691	0.0123095	0.0218539	0.0024469	0.0273671	0.0091117	0.011996	0.00582634	0.0135914	0.00584338	0.0308679	0.0180127	0.0925421		0.0916325		0.00903504		0.0581346		0.0365935	0.0287364	0.0221385
69.0699	C5H8H	Isoprene (63%), other fragments on this mass subtracted	1.89988	0.477155	1.84794	0.662193	1.59421	0.869346	2.10567	0.892508	1.20852	0.396206	1.21685	0.049937	1.92564		1.79407	0.180267	2.2298	1.02974	1.03298	0.213205	1.16342	0.0381045	0.636806	0.134587	0.47837	0.05813	0.994553	0.235666	3.68177		5.57506		0.528524		3.40617		2.07153	0.832166	0.416994
70.0287	C3H3NOH	unknown	0.0931697	0.0443938	0.151038	0.0506627	0.0988367	0.0855776	0.245461	0.187261	0.115068	0.0550495	0.11311	0.0203311	0.190087		0.145186	0.0188026	0.131156	0.0744285	0.0342318	0.0130412	0.0361474	0.00673472	0.024428	0.0130122	0.0176297	0.0099992	0.0587823	0.026838	0.260799		0.264851		0.25159		0.450376		0.0913333	0.0406923	0.0156653
70.0413	C4H6O	unknown	0.00483616	0.00299125	0.00529774	0.00171262	0.00343294	0.00230247	0.0164704	0.0224459	0.0106802	0.00690011	0.00282583	3.59582e-05	0.00557944		0.00416023	0.00109539	0.00972635	0.00497794	0.00224608	0.000284729	0.00245652	0.000319545	0.00241559	0.00063218	0.00109962	0.000357033	0.00538004	0.00352445	0.0247837		0.0190128		0.00304037		0.0914021		0.000657166	0.000102713	0.000418988
70.0651	C4H7NH	butanenitriles (61%), dihydropyrrole (39%)	1.65839	0.483516	1.57261	0.437158	1.36914	0.585184	1.72472	0.690711	1.14979	0.282003	0.942233	0.0412451	2.03375		1.31859	0.190284	0.991268	0.375931	0.606741	0.179148	0.753725	0.129247	0.402836	0.0862683	0.344499	0.0692537	0.787311	0.387291	3.45647		6.35047		0.26003		3.03875		1.88802	0.872653	0.384017
71.0128	C3H2O2H	Propiolic acid	0.438365	0.129278	0.467412	0.146883	0.348645	0.132569	1.06036	1.14533	0.536419	0.257506	0.462315	0.0151701	0.986724		0.320434	0.0231872	0.349818	0.0939106	0.296483	0.0365863	0.307869	0.0235309	0.147847	0.0362497	0.103899	0.0214818	0.379952	0.174209	1.00579		1.52042		0.665387		1.8893		0.385681	0.165701	0.0962805
71.0491	C4H6OH	MVK (48%), methacrolein (19%), crotonaldehyde (33%)	0.00753482	0.00221516	0.00909697	0.00357519	0.00793494	0.00507732	0.00675468	0.00472693	0.0038675	0.00289484	0.00254242	0.000287691	0.00424817		0.0103483	0.000375342	0.00738384	0.00350881	0.00602508	0.00136911	0.00800057	0.00327713	0.00488348	0.00124582	0.00366127	0.000984182	0.00745969	0.00277903	0.012443		0.0159315		0.000167908		8.67162e-05		0.00513785	0.00216899	0.00200029
71.0855	C5H10H	pentenes+methylbutenes (69%), other fragments on this mass subtracted	2.9218	0.897857	2.49849	0.828981	2.12057	0.986624	3.99473	2.2102	2.04809	0.729691	1.78553	0.0732686	3.09916		2.33216	0.425794	2.34612	0.578097	1.67122	0.336842	1.69525	0.285622	0.919936	0.185149	0.709935	0.0994417	1.84755	0.792824	9.03768		14.9269		0.514097		6.1032		4.3373	1.86944	0.900738
72.0808	C4H9NH	butene amines (~50%), tetrahydropyrrole (~50%)	0.0034121	0.000924476	0.00429216	0.000994526	0.00352471	0.00178163	0.00447247	0.00218557	0.00439245	0.00128454	0.00161599	0.000421237	0.00490655		0.00201132	0.000193462	0.00213037	0.000117214	0.00182507	0.000715284	0.00215562	0.000520523	0.00135757	7.78115e-05	0.00119603	0.000345732	0.00238026	0.00186091	0.0065313		0.00710387		0.00189201		0.0135574		0.000776985	0.000106836	0.00154285
73.0284	C3H4O2H	methyl glyoxal (~50%), acrylic acid (~50%)	0.000291444	0.000105086	0.000353126	0.000100951	0.000210816	0.000117192	0.000491458	0.000199525	0.000301093	0.000121437	0.000150387	1.99171e-05	0.000305797		0.000353116	6.32201e-06	0.000387288	9.38028e-05	0.000184238	6.84423e-06	0.000167195	2.08797e-05	0.000133957	3.70286e-05	0.00018248	9.09778e-05	0.00022098	8.36138e-05	0.000591627		0.00071149		0.000370521		0.00146335		0.000156615	6.25047e-05	0.000148992
73.0648	C4H8OH	MEK (85%), 2-methylpropanal (14%), butanal (1%)	1.79853	1.02919	2.03247	1.05587	1.99985	1.82122	2.68458	1.06327	0.980845	0.244226	0.556638	0.0542384	0.964851		2.98488	0.628157	2.15526	0.919713	1.2339	0.404228	1.47077	0.34069	1.12053	0.110204	1.0855	0.20749	1.30306	0.44392	2.23758		0.630901		1.22935		2.05153		0.57164	0.0859998	0.615038
74.0111	CH2N2O2	unknown	0.0869452	0.0486635	0.101516	0.0294594	0.091063	0.0755129	0.279749	0.362912	0.193048	0.141693	0.0616997	0.00283686	0.234416		0.0928608	0.0105637	0.110588	0.0624044	0.0460128	0.0149749	0.0630319	0.00757692	0.040839	0.00828975	0.0263997	0.0039947	0.0973302	0.0398461	0.174542		0.156915		0.182053		1.01774		0.0206885	0.00210467	0.00653233
74.0237	C2H3NO2H	nitroethene	0.819956	0.363838	0.632915	0.298156	0.541346	0.281536	0.664895	0.31978	0.427009	0.190436	0.33259	0.00633352	0.476935		0.497177	0.0343873	0.537241	0.11254	0.431391	0.0865295	0.445249	0.0654967	0.283385	0.051019	0.201052	0.0188874	0.433829	0.102767	1.49225		2.22789		0.0624544		0.833758		0.853346	0.440174	0.173766
74.0349	CH3N3OH	unknown	0.0640936	0.0444393	0.0715657	0.0275457	0.0566476	0.0472446	0.252408	0.350761	0.120462	0.0841234	0.0520388	0.00601033	0.100163		0.0645762	0.00908497	0.0746312	0.0332592	0.0321136	0.00876228	0.0406403	0.00351089	0.0241964	0.00622599	0.0143064	0.00219457	0.100076	0.0515117	0.147744		0.170407		0.0553486		0.672262		0.0139311	0.00225797	0.0041121
74.06	C3H7NOH	unknown	1.63466	0.500032	1.50706	0.466396	1.23459	0.50137	2.26522	1.61819	1.48157	0.520739	1.48384	0.105096	2.8032		0.995462	0.0928805	1.02735	0.273846	0.899323	0.172818	0.958704	0.00541012	0.449684	0.1053	0.340721	0.0481268	0.799027	0.18561	2.83313		5.08685		0.881043		4.01995		1.53977	0.624448	0.321939
75.0441	C3H6O2H	hydroxyacetone (~50%), methyl acetate (35%), ethyl formate (14%)	0.0207384	0.0145893	0.0280854	0.00990399	0.0190416	0.0146022	0.106651	0.166692	0.0589905	0.0469605	0.0163086	0.00157601	0.0480379		0.0243562	0.00435089	0.0277112	0.0151441	0.00905465	0.00264725	0.0101638	1.46571e-05	0.00645509	0.00200172	0.00374515	0.000568097	0.023081	0.0175315	0.0574976		0.063457		0.0403625		0.244194		0.00290989	0.000136958	0.000306802
76.0393	C2H5NO2H	nitroethane	0.0549278	0.0333428	0.0652161	0.037205	0.0512013	0.018233	0.0769037	0.0538278	0.055058	0.013152	0.0510916	0.00359643	0.0925999		0.0341687	0.0016745	0.0302274	0.00535357	0.0235961	0.000365525	0.0326678	0.00500034	0.0186513	0.00306641	0.0145402	0.00174625	0.0286911	0.0143339	0.10763		0.186326		0.0445731		0.165003		0.093586	0.0645396	0.0159534
77.0022	C5HO	unknown	2.03801	0.771135	1.82039	0.610414	1.51257	0.5637	1.89745	0.976518	1.33193	0.443474	1.54481	0.0999235	2.99842		0.992851	0.0694625	0.827661	0.280693	0.750572	0.221745	0.911677	0.166009	0.459945	0.101952	0.357272	0.0526864	0.781252	0.320442	3.48696		6.83742		0.439706		3.49669		2.52654	1.12477	0.444228
77.0233	C2H4O3H	unknown	0.531721	0.150518	0.54786	0.173964	0.482478	0.262801	0.865886	0.566309	0.453544	0.200319	0.474631	0.00372841	0.871932		0.513755	0.0643816	0.501229	0.220972	0.256531	0.0457245	0.277934	0.00872474	0.146256	0.0334305	0.10615	0.0171018	0.251989	0.0583344	0.996989		1.5122		0.247231		1.37472		0.52422	0.225211	0.111579
77.0597	C3H8O2H	unknown	2.14095	0.614636	1.84103	0.642697	1.52638	0.677168	2.47815	1.33953	1.47093	0.456417	1.29063	0.0133701	2.34162		1.52603	0.100084	1.51502	0.370952	1.30585	0.205424	1.35735	0.209292	0.758585	0.165616	0.581677	0.0944309	1.22967	0.306242	5.7336		11.419		0.670432		4.82442		3.47168	1.82741	0.559953
78.0008	CH3NOSH	n-sulfinylmethanamine	0.115933	0.0526627	0.148944	0.0653392	0.104133	0.0644955	0.372323	0.457507	0.160083	0.109053	0.139706	0.0182406	0.348154		0.09576	0.00468758	0.111216	0.0411987	0.043541	0.0055421	0.044903	0.0130199	0.025966	0.0177074	0.0182329	0.0194545	0.0845374	0.0278306	0.383401		0.656261		0.264146		0.670063		0.16814	0.0976298	0.0294371
78.0338	C5H3NH	unknown	0.0575897	0.0344284	0.0521414	0.0205983	0.0476475	0.0188529	0.0420509	0.0143193	0.0294447	0.0152557	0.0328775	0.00510232	0.0635858		0.0355028	0.000904322	0.0217205	0.0122013	0.0172319	0.00685395	0.0193195	0.00567905	0.00561334	0.00261607	0.00725434	0.00461371	0.0232102	0.0159613	0.0846328		0.0936553		0.000533197		0.0410013		0.0539622	0.0214661	0.0221265
78.0913	C3H11NOH	unknown	0.32696	0.0689618	0.318715	0.0945353	0.216825	0.0841095	0.446687	0.308597	0.294111	0.100163	0.289148	0.0284046	0.717247		0.185589	0.0227011	0.281883	0.0351474	0.254439	0.0419511	0.250461	0.0420965	0.140497	0.0286179	0.10515	0.0230654	0.217441	0.0528729	0.870913		1.72155		0.146783		0.942028		0.417014	0.217651	0.104061
79.0542	C6H6H	benzene (90%) (fragments on this mass subtracted)	0.00150411	0.000452628	0.0015978	0.000490531	0.00134351	0.000601261	0.00361773	0.00410307	0.00296857	0.00188296	0.0010026	4.17459e-05	0.00257965		0.00100518	7.86946e-05	0.00151258	0.000435866	0.000812516	0.000168545	0.000891919	0.00011136	0.000603264	8.91934e-05	0.000433492	3.11307e-05	0.00109853	0.000659353	0.00453763		0.00664294		0.00112172		0.0266804		0.000817017	0.000231955	0.00051228
80.0131	C4HONH	unknown	0.00665198	0.00472933	0.00739139	0.00318315	0.00959597	0.00937502	0.0105537	0.00583694	0.00403402	0.00163811	0.00240542	9.10806e-05	0.00466355		0.0111921	0.000885936	0.0065422	0.00436142	0.0039678	0.00202781	0.00601062	0.00126241	0.00170128	0.000275444	0.00171856	0.000672832	0.0071651	0.00553665	0.00960807		0.0045083		0.0032291		0.0213888		0.00132158	0.000504168	0.001054
80.0403	CH8N2S	unknown	0.891165	0.552061	1.01019	0.438351	1.03161	0.862667	1.91432	1.1605	0.719048	0.234499	0.658313	0.051361	0.856455		1.31245	0.190744	0.826097	0.438283	0.45454	0.135709	0.52902	0.125713	0.263887	0.037526	0.213372	0.0459935	0.459856	0.190259	1.12606		0.60057		0.727645		2.20873		0.258108	0.0649968	0.150099
80.0495	C5H5NH	pyridine(44%), nitriles (56%)	0.00786017	0.00321663	0.0107208	0.00468863	0.00684134	0.00227686	0.0155935	0.0202082	0.0197192	0.0124429	0.0104718	0.00155452	0.0374931		0.00484708	1.91609e-05	0.00526496	0.00277847	0.00281838	0.0007114	0.00367946	5.27445e-05	0.002201	0.000532544	0.00176294	0.000401116	0.00490203	0.00210802	0.0109552		0.0223406		0.0245547		0.0598289		0.00370621	0.00079291	0.0012408
81.0335	C5H4OH	2,4-Cyclopentadiene-1-one (42%), other HCO2 (58%)	0.0542297	0.0384965	0.0563723	0.0249106	0.0551154	0.050587	0.200119	0.275061	0.106328	0.0798677	0.0435374	0.00245227	0.0807301		0.0482002	0.00635776	0.0607647	0.0332119	0.0271221	0.0072604	0.0357053	0.00465347	0.0209197	0.0054465	0.0105637	0.000209014	0.0472578	0.0170233	0.10778		0.0973905		0.0847111		0.492177		0.00900167	0.000294307	0.00234767
81.0699	C6H8H	unknown	0.00890043	0.00416669	0.00987278	0.00363254	0.00587138	0.00483796	0.0141994	0.0126915	0.00704854	0.00422835	0.00666127	0.00118817	0.0160599		0.00457722	0.00117838	0.00726829	0.00202041	0.00316222	0.000163184	0.00368513	0.00133328	0.0016092	0.000633275	0.00163595	0.000562131	0.00521894	0.00180463	0.0185122		0.0190527		0.00492627		0.0174613		0.00814886	0.00596786	0.0027741
82.0287	C4H3NOH	unknown	2.51595	1.49219	2.2903	1.24509	2.33865	2.01835	2.992	1.70561	1.37909	0.395717	1.2647	0.0313457	2.21534		1.73232	0.220621	1.64257	0.778177	1.2033	0.356814	1.46347	0.134296	0.614779	0.092158	0.476174	0.0681286	1.49733	0.771017	3.16889		3.05244		2.21795		3.86906		1.48857	0.705701	0.489647
82.0413	C5H5OH	unknown	0.0406239	0.0304538	0.039606	0.0187849	0.035021	0.0223311	0.0842445	0.0900651	0.0652911	0.0442303	0.026714	0.000940499	0.0546267		0.0212164	0.00339487	0.0238242	0.0119312	0.0221902	0.00901986	0.0329786	0.00350472	0.0251413	0.00596041	0.0109353	0.00150698	0.0215938	0.0105054	0.0754519		0.0702071		0.0418289		0.489788		0.00948447	0.00205908	0.00530942
82.0651	C5H7NH	methylpyrrole (33%), pentenenitriles (97%)	0.0247215	0.0176759	0.0304226	0.0118824	0.0214395	0.0174251	0.127211	0.189538	0.0588343	0.0415438	0.027932	0.00319088	0.053548		0.0259312	0.00402905	0.0303423	0.0135179	0.0111611	0.00233287	0.0141789	0.00114348	0.0074789	0.00217596	0.00435495	0.00111977	0.0309419	0.016358	0.0753117		0.0774752		0.0220836		0.376728		0.00462383	0.000816251	0.00116377
83.0128	C4H2O2H	unknown	2.56137	0.894523	2.16161	0.667816	1.96546	0.921126	2.17449	1.0968	1.64961	0.538977	2.20603	0.340448	7.12916		1.02567	0.0740163	1.26659	0.236703	1.13176	0.310381	1.34107	0.261613	0.562613	0.132865	0.447914	0.0523509	1.03331	0.252461	5.01045		6.69547		2.35232		4.03275		2.15011	1.1225	0.851468
83.0491	C5H6OH	2-methyl furan (51%), 3-methylfuran (10%), general HCO (37%)	0.805025	0.275871	0.788746	0.280223	0.645354	0.330941	1.43433	1.11869	0.754597	0.334708	0.761698	0.0598464	1.47839		0.61122	0.0521017	0.715347	0.266354	0.462609	0.0533603	0.478707	0.0475101	0.225683	0.0537908	0.162715	0.0479378	0.43787	0.0813329	1.88176		2.83175		0.46934		2.56445		0.874784	0.418867	0.157852
83.0855	C6H10H	unknown	0.00720396	0.00589305	0.00936078	0.00366691	0.00679694	0.0058348	0.0410343	0.0650036	0.020149	0.0159447	0.00515335	0.00102271	0.0164979		0.00852737	0.0016488	0.00892483	0.0046392	0.00269415	0.000852516	0.00289939	0.000156447	0.00198964	0.000605029	0.00120964	0.000236773	0.00827941	0.00675953	0.0215048		0.0231069		0.0135974		0.0952824		0.000923861	0.000131865	0.000469049
84.0444	C4H5NOH	unknown	0.0725154	0.0428884	0.0816177	0.0491768	0.0633966	0.031124	0.105911	0.0752498	0.0537815	0.0153871	0.0810064	0.0135429	0.184907		0.0495724	0.0078193	0.0421579	0.0100283	0.0319811	0.00245608	0.037285	0.000401911	0.0205706	0.0035849	0.0159458	0.00377109	0.0377238	0.0147765	0.206634		0.417301		0.0387325		0.242607		0.129099	0.0671115	0.0212385
84.0808	C5H9NH	Pentanenitriles	1.68127	0.612712	1.46674	0.507373	1.20905	0.446144	1.89255	1.064	1.15637	0.376605	1.51113	0.0716792	2.67317		0.917986	0.0895033	0.815083	0.249004	0.697291	0.16062	0.808752	0.149338	0.434856	0.0984022	0.329291	0.0375359	0.701968	0.222581	3.67362		6.74087		0.357739		3.33285		2.42623	1.0117	0.363369
85.0106	C4H4SH	thiofuran (=thiophene)	0.063945	0.0277541	0.0869388	0.0359275	0.0639883	0.0476274	0.195926	0.180571	0.0676954	0.0453879	0.0598984	0.0271001	0.141981		0.0858429	0.0068836	0.0721286	0.0342315	0.0321488	0.00337447	0.0308729	0.00482783	0.0204287	0.00812925	0.0146421	0.00722164	0.0414594	0.0108365	0.206406		0.299423		0.0704879		0.245644		0.106474	0.0644583	0.015531
85.0284	C4H4O2H	2-(3H)-furanone, other fragments on this mass subtracted	0.333231	0.208638	0.186848	0.0772502	0.145695	0.0525382	0.22041	0.11107	0.125214	0.0383473	0.148048	0.0304908	0.377361		0.0747083	0.00411013	0.0402677	0.0181928	0.0495858	0.0166057	0.0622168	0.0147272	0.0288064	0.00780881	0.0271785	0.00926116	0.0617137	0.0354169	0.233891		0.354774		0.118983		0.226823		0.13508	0.073016	0.0417951
85.0648	C5H8OH	3-methyl-3-butene-2-one (37%), cyclopentanone (18%), HCO1 (45%)	0.57077	0.170526	0.522665	0.182012	0.413899	0.16799	0.672379	0.373143	0.426493	0.167049	0.495124	0.0262383	0.823184		0.349215	0.0354691	0.34066	0.0856287	0.310243	0.0572804	0.335091	0.0466026	0.186859	0.0413635	0.137414	0.0245916	0.27593	0.0574934	1.20358		2.14222		0.20525		0.983214		0.749205	0.351032	0.138808
85.1012	C6H12H	unknown	0.0131382	0.0101711	0.0182276	0.0121748	0.0126494	0.0115721	0.0410035	0.0464341	0.0148399	0.0120188	0.0139335	0.00797556	0.0419111		0.0132703	0.00125787	0.00904724	0.00373767	0.0017601	0.000323748	0.00111659	0.000798351	0.00186639	0.00275245	0.00171179	0.00217736	0.00888225	0.00416572	0.0430581		0.0554294		0.0257325		0.0509576		0.0172689	0.0104527	0.00345164
86.0237	C3H3NO2H	unknown	0.366066	0.137087	0.331339	0.114578	0.262879	0.117315	0.432414	0.215174	0.272664	0.0987393	0.239911	0.00497112	0.407977		0.235551	0.0330874	0.208341	0.0630462	0.147781	0.0428886	0.179438	0.0438947	0.0979923	0.0240731	0.0785794	0.0109256	0.187686	0.096932	1.11076		1.631		0.0214373		0.847846		0.624743	0.319409	0.100972
86.0964	C5H11NH	unknown	0.0380247	0.0324642	0.0416035	0.0275418	0.0514725	0.065667	0.0571749	0.0536176	0.0065396	0.00151805	0.0048918	2.54378e-05	0.00410265		0.0783191	0.0197974	0.0679267	0.0179551	0.0348665	0.0183427	0.0475965	0.0203381	0.0522583	0.0132142	0.0527723	0.0104034	0.05334	0.0397392	0.0310839		7.42954e-05		0.00993012		0.0269463		0.00358458	0.000903007	0.0191201
87.0077	C3H2O3H	unknown	0.0651854	0.0339175	0.0774812	0.0128872	0.0632545	0.043337	0.115863	0.0943342	0.114084	0.0535292	0.0416357	0.00653936	0.0865464		0.0743495	0.00662573	0.0760535	0.0351242	0.0480808	0.0132024	0.0630375	0.00578826	0.0437631	0.00409179	0.0359623	0.00618098	0.0868164	0.0379567	0.0731885		0.0890588		0.142964		0.323457		0.019539	0.0023833	0.00841554
87.0441	C4H6O2H	2,3-butanedione (87%), methyl acrylate (5%), other (8%)	0.282131	0.194141	0.315893	0.175152	0.345281	0.344187	0.436385	0.247318	0.166146	0.0525844	0.135831	0.00616881	0.142573		0.441248	0.0677835	0.278178	0.16839	0.155996	0.0601275	0.189782	0.0453743	0.0900735	0.00498365	0.0785781	0.0203016	0.474597	0.368951	0.354423		0.108976		0.130964		0.4611		0.0541077	0.00831166	0.0513635
87.0804	C5H10OH	3-methyl-2-butanone (43%), 2-methylbutanal+3-methylbutanal (4%), 2-pentanone (32%), 3-pentanone (21%)	0.00983244	0.00758945	0.0102336	0.00605389	0.0129018	0.0134565	0.0202532	0.0158024	0.00960293	0.00500165	0.0044264	0.000450277	0.0057493		0.0141506	0.000511424	0.0124016	0.00707799	0.00535099	0.00210072	0.00732912	0.00164797	0.00405331	0.000539209	0.00225037	0.000408851	0.00578921	0.00190949	0.0153565		0.0083785		0.00628558		0.0554896		0.00152986	7.88483e-05	0.000657613
87.1168	C6H14H	unknown	0.30041	0.120498	0.337484	0.158626	0.323227	0.225926	0.371936	0.151019	0.222628	0.0783487	0.133749	0.0115081	0.214735		0.333927	0.0325628	0.270479	0.128358	0.156995	0.0378378	0.171117	0.0038644	0.114385	0.012685	0.0950408	0.0175946	0.359347	0.234497	0.370084		0.250649		0.0744568		0.354077		0.10978	0.0366272	0.0556971
88.0393	C3H6NO2	unknown	0.390506	0.237974	0.426484	0.152299	0.532249	0.455736	0.838929	0.526728	0.294204	0.0892645	0.39023	0.0523845	0.411065		0.773525	0.122483	0.324937	0.189721	0.185203	0.0552604	0.213176	0.0540454	0.0973656	0.0251747	0.0713928	0.0147271	0.143948	0.0540087	0.548183		0.284545		0.439121		0.941241		0.107028	0.0213181	0.048778
88.0757	C4H9NOH	unknown	0.015797	0.00556607	0.0190777	0.00507386	0.0156734	0.00967432	0.0330018	0.0302555	0.0232055	0.012011	0.0112502	0.000319938	0.0335347		0.0172327	0.0011616	0.0160135	0.00895651	0.0070821	0.00165634	0.00860718	0.000232745	0.00625209	0.00173292	0.00434585	0.000924624	0.0164942	0.00735094	0.0345362		0.0400276		0.0159929		0.0737776		0.00781291	0.00386483	0.00310842
89.0233	C3H4O3H	pyruvic acid	0.017655	0.0149493	0.0175381	0.00988673	0.0165651	0.0152007	0.0808255	0.120672	0.0390979	0.0299731	0.0159762	0.000428752	0.0197354		0.0123	0.00200659	0.0227526	0.0129688	0.00879546	0.00270322	0.0116138	0.002522	0.00645334	0.00192483	0.00271038	0.000361909	0.0127206	0.00504601	0.0353706		0.0310663		0.0265895		0.238316		0.00146421	0.000928325	0.000498043
89.0597	C4H8O2H	Methyl propanoate	0.36768	0.157885	0.299535	0.0777855	0.297813	0.131578	0.239988	0.124976	0.227896	0.0959882	0.236356	0.0382312	0.436571		0.148804	0.00630745	0.275468	0.0982226	1.06086	0.288907	1.28223	0.422578	0.274104	0.0650701	0.25712	0.0395674	0.13405	0.040314	0.483203		0.404221		0.0605222		0.239016		0.194077	0.00282271	0.0553158
90.0186	C2H3NO3H	unknown	1.66088	0.707742	1.44924	0.529831	1.40641	0.683063	2.64244	1.63017	1.40061	0.50248	1.41725	0.0229925	2.75506		1.2043	0.14486	0.997412	0.419508	0.666694	0.071364	0.703769	0.135071	0.371353	0.0762862	0.25575	0.0448255	1.02279	0.364174	2.88851		2.54588		1.03936		3.74068		1.07725	0.425723	0.350747
90.055	C3H7NO2H	nitropropanes	0.0101203	0.00600724	0.012125	0.00460787	0.00806942	0.00486219	0.0495378	0.0758081	0.0208368	0.0135284	0.0109557	0.000785867	0.0270143		0.00832653	0.00116131	0.00976526	0.0035387	0.00432222	0.000838536	0.00533749	2.10882e-05	0.0030139	0.00075745	0.00192237	0.000527869	0.00884945	0.00506725	0.0306371		0.0298511		0.0133933		0.149604		0.00279135	0.00108563	0.000756562
90.0913	C4H11NOH	unknown	2.90832	1.11411	2.36206	0.874245	2.41823	1.04695	2.76752	1.53709	2.04562	0.795946	2.73424	0.30792	6.12479		1.08985	0.0581619	1.15857	0.385893	2.92998	1.62525	3.89184	0.431214	0.608721	0.146705	0.465853	0.0640958	0.847526	0.337751	3.59992		4.99861		1.12219		4.12332		1.63605	0.615356	0.434618
91.0026	C2H2O4H	unknown	0.259483	0.0898065	0.276214	0.0948102	0.219672	0.138695	0.620741	0.491124	0.289987	0.14708	0.27324	0.0321918	0.445034		0.227903	0.0238729	0.253944	0.103859	0.126336	0.0209569	0.11111	0.0216281	0.0757904	0.0187112	0.05416	0.0234545	0.147	0.0208177	0.731514		1.08461		0.198254		1.00476		0.272314	0.120539	0.0476467
91.039	C3H6O3H	unknown	0.0162154	0.00673475	0.0228511	0.00760055	0.0164096	0.0099431	0.0388634	0.0409936	0.0322794	0.0189467	0.0120392	0.000847554	0.036994		0.0160254	0.00233392	0.0127942	0.00627053	0.00425534	0.000474372	0.00515809	0.00231717	0.00638934	0.00195705	0.0044568	0.000924446	0.0151433	0.00932098	0.035085		0.0572763		0.0252182		0.128007		0.00673913	0.00369189	0.00276578
91.0542	C7H6H	unknown	0.378775	0.185515	0.366161	0.132615	0.320066	0.140129	0.417361	0.226264	0.278153	0.0803741	0.386185	0.0828572	0.886876		0.167312	0.0196304	0.0990103	0.0438096	0.113835	0.0444824	0.152975	0.0370361	0.0648812	0.020101	0.0535914	0.0167132	0.141284	0.0952633	0.504229		0.966969		0.167145		0.742985		0.299791	0.129406	0.0631751
92.0495	C6H6N	ethynylpyrrole	0.75353	0.252847	0.656688	0.240906	0.555246	0.256653	0.949889	0.597195	0.566987	0.264356	0.691234	0.0390169	1.19169		0.373679	0.0302418	0.400835	0.0984103	0.341577	0.0614865	0.366061	0.0451368	0.183892	0.0411168	0.140435	0.0300747	0.279581	0.0671494	1.61864		2.80974		0.139186		1.77523		0.874439	0.380455	0.14764
92.107	C4H13NOH	unknown	0.0243495	0.0133039	0.0430638	0.02072	0.0320105	0.0241914	0.0712994	0.062643	0.0268787	0.0180255	0.032807	0.0126832	0.0870263		0.0337611	0.00323658	0.0257651	0.0161448	0.00982891	0.00309104	0.0098959	0.0010477	0.00648507	0.00347241	0.00490622	0.00196671	0.017984	0.00954891	0.0850478		0.115893		0.0393415		0.110663		0.0315568	0.0165978	0.00529125
93.0335	C6H4OH	unknown	0.00411514	0.00168981	0.00478289	0.00197078	0.00300179	0.00112332	0.00386171	0.00187815	0.00302502	0.000871079	0.0026438	0.000702662	0.0110842		0.00263853	0.000122064	0.00210142	0.00101064	0.00193592	0.000508091	0.00259752	0.00112882	0.00119172	0.000650578	0.00100275	0.000309793	0.00254252	0.00167736	0.0110893		0.0117851		0.00115336		0.00536649		0.00437702	0.00300597	0.00157848
93.0546	C3H8O3H	unknown	0.754747	0.28607	0.663982	0.235913	0.521477	0.196197	0.630101	0.270826	0.387343	0.100473	0.621341	0.0535657	1.50942		0.322286	0.0341953	0.270059	0.0709609	0.264449	0.104662	0.345667	0.0833228	0.160498	0.0400956	0.131744	0.0302242	0.289376	0.155787	1.95182		2.78751		0.0863893		2.19064		0.884219	0.399102	0.172752
93.0699	C7H8H	toluene	0.0901883	0.0323788	0.115132	0.0448342	0.0892012	0.0588835	0.170236	0.120248	0.0903289	0.0459695	0.0948132	0.00494217	0.175597		0.0859139	0.0115509	0.0735651	0.0311481	0.0474606	0.00945988	0.0457137	0.00186902	0.026882	0.00648391	0.0199192	0.00653357	0.046934	0.0173601	0.235409		0.323176		0.0595334		0.227987		0.0919359	0.0514199	0.0200315
94.0287	C5H3NOH	2-furan carbonitrile (30%), 3-furan carbonitrile (70%)	0.0266473	0.0147512	0.030614	0.0160745	0.0203665	0.00928184	0.0445153	0.0384883	0.0179875	0.00755312	0.0293999	0.00798347	0.0891896		0.0184503	0.0017957	0.0147998	0.00406122	0.0074307	0.00252082	0.00930926	0.00230377	0.00610044	0.00197751	0.00450295	0.00121119	0.0153663	0.00826562	0.107982		0.139162		0.0177463		0.115365		0.048231	0.0249168	0.00849298
94.0499	C2H7NO3H	unknown	0.510176	0.22676	0.348357	0.114989	0.261321	0.126897	0.390124	0.178314	0.280852	0.148242	0.300972	0.00508063	0.374931		0.217779	0.0145867	0.223978	0.036395	0.262777	0.0505131	0.277849	0.0656545	0.159308	0.0371114	0.11874	0.025444	0.2076	0.0342347	1.43316		3.43398		0.0146047		0.901989		1.07414	0.685661	0.135754
94.0651	C6H7NH	2-methyl pyridine (93%), 3-methylpyridine (7%)	0.0864887	0.0729865	0.10208	0.0673831	0.119776	0.137216	0.143066	0.124954	0.0302989	0.00652719	0.0226735	0.00483357	0.0324825		0.171716	0.0318287	0.0873616	0.0727625	0.0645159	0.0388184	0.0914162	0.0372535	0.0281244	0.00355225	0.0343159	0.0080596	0.0538416	0.0421166	0.0948884		0.0111939		0.0433847		0.0914163		0.00831	0.00237299	0.0156111
94.9984	C2H6S2H	dimethyl disulfide	0.0186265	0.012416	0.0419132	0.0290155	0.0155727	0.00996345	0.0708835	0.0951231	0.0518092	0.030205	0.0454306	0.00228441	0.141948		0.0097099	0.00102775	0.0202626	0.00213184	0.00197999	0.000338864	0.000493821	0.000302694	0.00260707	0.00376105	0.00172521	0.00216242	0.00892078	0.0041961	0.0541614		0.0467337		0.0421683		0.156383		0.0502764	0.0439319	0.00712755
95.0128	C5H2O2H	unknown	0.00698792	0.00357945	0.00798853	0.00306911	0.00672652	0.00451932	0.0134438	0.01058	0.00684823	0.00262257	0.0041575	0.000197388	0.0104644		0.00708494	0.00047819	0.00681191	0.00324533	0.00423716	0.000687027	0.00517304	0.000124106	0.00323556	0.000529744	0.00253819	0.000504619	0.0137356	0.00953982	0.0172619		0.0245873		0.00645173		0.0301267		0.0021884	5.16361e-05	0.00146817
95.0491	C6H6OH	phenol (100%), vinyl furan	0.0291238	0.0260569	0.030538	0.0170626	0.0317922	0.0340653	0.0697755	0.070483	0.0319835	0.0194159	0.0117872	0.00193161	0.0212967		0.03814	0.00454331	0.0351356	0.0224521	0.0136312	0.00619238	0.0184098	0.00309426	0.00960637	0.00122219	0.00629004	0.00143843	0.0253248	0.0183196	0.0503225		0.0224429		0.0211808		0.190904		0.000522753	0.000461526	0.00075451
95.0855	C7H10H	unknown	0.12399	0.044458	0.11791	0.0557905	0.114654	0.0747275	0.144284	0.0514813	0.0892293	0.0337184	0.0577412	0.00223324	0.0909962		0.120401	0.0129978	0.110743	0.0494524	0.0638331	0.0133772	0.071526	0.00775849	0.0476529	0.00386168	0.0385322	0.00633208	0.407555	0.29966	0.166842		0.167747		0.065354		0.220178		0.0667084	0.0230675	0.0308131
96.0206	C5H3O2H	unknown	0.14217	0.0990747	0.158451	0.081952	0.160806	0.149774	0.218593	0.144741	0.0759846	0.0281598	0.102377	0.010903	0.0909949		0.248774	0.0450564	0.108688	0.0730025	0.058806	0.0225823	0.0730552	0.020535	0.0287828	0.00817575	0.0204097	0.00497093	0.0472167	0.0203245	0.162197		0.0620011		0.108555		0.230913		0.0262089	0.00363611	0.0160854
96.0444	C5H5NOH	4-Pyridinol, pyridine oxide	0.0039184	0.00336235	0.0037089	0.00217839	0.00410538	0.00401031	0.0124173	0.0138723	0.00571507	0.00381989	0.0025388	0.000143174	0.00321578		0.00593487	9.93602e-05	0.00535973	0.00297437	0.0018719	0.000468091	0.00242814	0.000764068	0.00148201	0.000353189	0.000635226	0.000120583	0.00229927	0.000898495	0.00337736		0.00206822		0.00335176		0.0414492		0.000492893	9.77735e-05	0.000282118
96.0808	C6H9NH	2,5-dimethyl pyrrole (70%), ethylpyrrole (25%), other C2-pyrroles (5%)	0.320135	0.188653	0.392989	0.210941	0.359152	0.317175	0.503193	0.322713	0.248991	0.0846357	0.234121	0.00567921	0.267049		0.275768	0.0246944	0.167683	0.0901137	0.154151	0.0556016	0.189222	0.0153469	0.0737809	0.0151807	0.0568834	0.013866	0.318424	0.22034	1.06123		1.43966		0.115031		1.24		0.143646	0.0720506	0.0391939
97.0284	C5H4O2H	2-furfural (88%), 3-furfural (4%), other HCO2 (12%)	0.149475	0.0993778	0.161299	0.052889	0.19774	0.161523	0.327645	0.220994	0.107349	0.0367134	0.182685	0.0280892	0.180785		0.350506	0.0598991	0.103232	0.0639059	0.0549868	0.0170941	0.0614655	0.0170516	0.0275883	0.00841083	0.018124	0.00355395	0.0278376	0.00733568	0.151803		0.0431123		0.209099		0.31267		0.0269057	0.0017409	0.0130007
97.0648	C6H8OH	2,5-dimethyl furan (44%), 2-ethylfuran (10%), other C2-furans (46%)	0.259279	0.103985	0.245649	0.0921077	0.220855	0.141513	0.356523	0.32575	0.203269	0.0765899	0.114679	0.0151622	0.180402		0.120552	0.00145391	0.11729	0.044425	0.111092	0.029735	0.13018	0.013971	0.0677161	0.0155133	0.0516061	0.0112708	0.179246	0.102854	0.291047		0.351341		0.307214		0.249727		0.155115	0.0870447	0.0457902
97.1012	C7H12H	unknown	0.392818	0.177081	0.343581	0.110014	0.315392	0.126431	0.634818	0.449587	0.398064	0.176078	0.377767	0.0204358	0.67243		0.248291	0.0360518	0.221634	0.0838738	0.171162	0.0110709	0.178105	0.0241375	0.0797725	0.0178322	0.0575936	0.012318	0.192726	0.045802	0.769998		0.890088		0.253902		1.34614		0.269132	0.104818	0.0771274
98.0237	C4H3NO2H	unknown	0.0179694	0.00467504	0.0248289	0.0143055	0.0179102	0.00603697	0.0273541	0.0171777	0.020028	0.0076758	0.0144369	0.000603846	0.0607787		0.0147517	0.00151881	0.0108879	0.00486544	0.00632576	0.00154937	0.00759269	0.00108683	0.00541476	0.00219974	0.00510033	0.0018443	0.011586	0.00561328	0.0334034		0.0437101		0.0135587		0.049905		0.011528	0.00726803	0.00906667
98.06	C5H7NOH	unknown	0.250223	0.107082	0.228832	0.0631142	0.195019	0.0815947	0.140834	0.0555768	0.16851	0.0720113	0.195886	0.0508975	0.311534		0.106361	0.00484544	0.0930422	0.0308201	0.1586	0.0455188	0.202346	0.0809252	0.0401297	0.0121721	0.0408606	0.0114625	0.0750842	0.0258479	0.282784		0.430683		0.0418006		0.136176		0.177877	0.0819461	0.0676303
98.0964	C6H11NH	4-methylpentanenitrile	1.75044	1.15967	1.14753	0.384404	1.37043	1.05815	1.56614	0.958404	1.73314	0.784733	1.59439	0.167116	3.42461		0.588051	0.026839	0.533169	0.0485277	0.462507	0.0884467	0.52731	0.0217159	0.234379	0.0538378	0.178278	0.0320372	0.311496	0.100379	1.91797		2.84613		0.50751		2.33081		0.973738	0.45905	0.227572
99.0011	C3H2N2SH	unknown	0.000448102	0.000224759	0.000787283	0.000579351	0.000445488	0.000295506	0.00504585	0.00955284	0.00209001	0.00201626	0.000454876	7.53763e-05	0.00185932		0.00044925	8.67763e-05	0.000590955	0.000259058	0.000260968	2.82534e-05	0.000268195	3.0117e-05	0.000189396	3.71636e-05	0.000139034	2.11665e-05	0.000504185	0.00037827	0.00158167		0.00200337		0.00421092		0.0208825		0.000144124	1.08587e-05	0.000120998
99.0077	C4H2O3H	unknown	0.00353762	0.00539102	0.00408514	0.00294007	0.00295297	0.0054376	0.00355196	0.00309166	0.00377668	0.00487419	0.00110243	0.000400049	0.00125816		0.00140879	0.000299756	0.00164328	0.000267862	0.000320513	0.000241263	3.42581e-05	4.84482e-05	0.000287495	0.000271079	0.00048473	0.000358288	0.000989108	0.00013327	0.0030986		0		0.000378646		0.000680596		0.00138023	0.00158974	0.00135797
99.0263	C5H6SH	methylthiofuran (methyl thiophene)	1.04869	0.638719	0.82184	0.278654	1.47125	0.804029	1.42738	0.746336	0.692656	0.3338	1.03347	0.178118	1.73398		0.296702	0.0215626	0.252391	0.0855028	0.463659	0.20233	0.652214	0.0252822	0.117242	0.0280086	0.0995481	0.0175595	0.215701	0.0930367	1.4531		1.42794		0.270466		1.10307		0.580338	0.134288	0.131051
99.0441	C5H6O2H	2-methanol furannone	0.438401	0.169924	0.401778	0.143243	0.332243	0.133703	0.56492	0.397333	0.398118	0.164848	0.514509	0.053518	0.982862		0.192224	0.0207178	0.166581	0.049833	0.167656	0.062628	0.206128	0.030614	0.0898487	0.0168515	0.0695177	0.00610192	0.15627	0.0807836	0.941801		1.00544		0.0640168		0.959767		0.440096	0.163773	0.091601
99.0804	C6H10OH	methylcyclopentanone+cyclohexanone (26%), hexenones (74%)	0.211125	0.13937	0.228538	0.148097	0.236563	0.2564	0.317071	0.228011	0.075014	0.0112757	0.0498333	0.00294834	0.0491888		0.368048	0.0946051	0.299435	0.124744	0.180621	0.0785393	0.223645	0.0681447	0.195038	0.0427623	0.200324	0.0459137	0.129554	0.0373717	0.260544		0.0393959		0.0743857		0.191477		0.0463537	0.00567458	0.0879058
99.1168	C7H14H	unknown	0.0862239	0.0554122	0.0980687	0.0513638	0.0908445	0.0856918	0.14425	0.102091	0.0505725	0.0139811	0.0496374	0.00654571	0.0649388		0.121034	0.0208508	0.0738336	0.0538115	0.0463614	0.0201057	0.0616627	0.0201716	0.0193986	0.00238074	0.0177952	0.00533966	0.0322596	0.013468	0.117291		0.0444534		0.0677154		0.14393		0.01833	0.00339267	0.0126824
100.039	C4H5NO2H	unknown	0.0114767	0.00986848	0.011927	0.00588962	0.0106136	0.0102054	0.0333058	0.0390371	0.0173025	0.0117386	0.00819436	0.000428682	0.0129436		0.0118672	0.00118546	0.0113237	0.00625922	0.00481908	0.00139786	0.00618329	0.000759906	0.00336326	0.000804393	0.00178684	0.000148965	0.00694855	0.00349481	0.0256293		0.0195784		0.00991819		0.111199		0.0011528	2.50442e-05	0.000364401
100.076	C5H9NOH	unknown	0.177496	0.0757227	0.156654	0.0729183	0.14329	0.0916372	0.211424	0.10868	0.131051	0.0463121	0.0956377	0.00935567	0.154052		0.144913	0.015691	0.11364	0.048351	0.0816329	0.0148047	0.0900739	0.0107744	0.0484935	0.00748817	0.0376978	0.00490401	1.60634	1.58831	0.220574		0.195864		0.0926749		0.270832		0.0793564	0.025308	0.0306868
100.088	C6H12O	unknown	0.106401	0.0780899	0.116796	0.0443789	0.0952952	0.0643714	0.154466	0.0981658	0.0604936	0.0204378	0.122557	0.0273965	0.137787		0.112943	0.0240385	0.0550191	0.0373578	0.0326478	0.0131953	0.038089	0.00798519	0.0147364	0.00507074	0.0102357	0.00214053	0.00301193	0.00425952	0.0953345		0.0349311		0.0742071		0.185288		0.0117872	0.0011847	0.00693449
100.112	C6H13NH	unknown	0.141131	0.0743812	0.149111	0.0764805	0.104998	0.0677043	0.152916	0.0877637	0.092307	0.032718	0.0999672	0.0122414	0.120065		0.103528	0.0124805	0.0655366	0.0341405	0.0457319	0.007429	0.0500018	0.00506707	0.0265362	0.00616604	0.0183852	0.00178495	0.0620825	0.0342271	0.166721		0.170693		0.0425477		0.230681		0.0555062	0.0189231	0.0145041
101.023	C4H4O3H	Dihydrofurandione	0.117205	0.0824139	0.121091	0.0501627	0.143517	0.122087	0.234577	0.172214	0.0690842	0.0166329	0.131987	0.0249645	0.108298		0.185402	0.0441799	0.166874	0.114357	0.0306423	0.0125643	0.0356076	0.00511434	0.0184293	0.00559384	0.0118814	0.00168314	0.0240413	0.0170092	0.0979551		0.0458996		0.103007		0.219193		0.0145105	0.0005969	0.00478724
101.06	C5H8O2H	methyl methacrylate (69%), other HCO2 (31%)	0.283942	0.136236	0.231593	0.0826362	0.221287	0.10643	0.298776	0.170073	0.306616	0.184787	0.170302	0.02538	0.255958		0.120564	0.00632763	0.122447	0.0423168	0.110241	0.0279549	0.12232	0.00711484	0.0602244	0.0147207	0.0426318	0.00487527	0.100418	0.037311	0.350065		0.441183		0.091531		0.383946		0.168249	0.0777724	0.0424791
101.096	C6H12OH	hexanals (47%), hexanones (53%)	3.0368	3.22833	2.3847	1.71493	5.41339	5.02047	7.97322	8.50434	0.792397	0.533635	1.75021	0.237636	0.407155		7.05126	1.13187	1.67502	1.28652	0.183588	0.100765	0.216369	0.0151012	0.120056	0.033643	0.0874446	0.0197834	0.101309	0.0696441	0.544207		0.396374		0.330401		2.09018		0.111499	0.00794507	0.0859797
101.132	C7H16H	unknown	0.0159081	0.00470157	0.016739	0.00627371	0.0141289	0.00640556	0.0335001	0.0377563	0.0376638	0.0267791	0.0144042	0.000899744	0.0456285		0.00734714	0.000252123	0.00707912	0.00244002	0.00387281	0.00104369	0.00498774	0.000477677	0.00322281	0.00101432	0.00217058	0.000263855	0.00504744	0.00211555	0.0244826		0.0540447		0.0122804		0.126296		0.00668329	0.00336815	0.00266782
102.019	C3H3NO3H	unknown	1.04222	0.689104	0.740712	0.251279	0.91889	0.829341	1.21204	0.607981	1.03779	0.511248	1.10086	0.135688	2.18966		0.287915	0.0192515	0.252562	0.00678832	0.203676	0.0322341	0.236896	0.0111259	0.108202	0.0228294	0.0843966	0.0170422	0.133926	0.0300191	0.866519		1.08698		0.199974		1.32312		0.549089	0.238267	0.177783
102.055	C4H8NO2	unknown	0.0908006	0.056982	0.0971069	0.055046	0.0896904	0.0867335	0.143225	0.100283	0.0504449	0.00898479	0.0398509	0.00394817	0.0483225		0.117987	0.0232525	0.0908947	0.0554844	0.061078	0.0254447	0.0766228	0.02406	0.0305236	0.00219857	0.0270162	0.0075743	0.0364912	0.00941509	0.124095		0.0280278		0.0696867		0.132654		0.0146952	0.00108781	0.0188061
102.091	C5H11NOH	unknown	0.483436	0.276646	0.422596	0.1895	0.366827	0.241394	0.341302	0.164546	0.375925	0.22443	0.668268	0.175644	1.28097		0.108168	0.0103289	0.0732305	0.0237252	0.104758	0.0435603	0.13647	0.0247216	0.0324204	0.00878303	0.0287943	0.00681596	0.0831515	0.0526456	0.359772		0.596459		0.323035		0.551241		0.286042	0.083375	0.0678334
103.039	C4H6O3H	acetic anhydride, MPAN and CPAN indicator	0.0593441	0.0366384	0.0647615	0.038419	0.0562073	0.0549513	0.0696213	0.0609919	0.0322951	0.00119612	0.0305842	0.0182376	0.0328494		0.0548768	0.00626877	0.0541025	0.02922	0.0456461	0.0138364	0.0527312	0.00988472	0.0256581	0.00342406	0.020026	0.004275	0.0301256	0.00839964	0.08253		0.0461503		0.0075542		0.0840515		0.0213009	0.00797606	0.00950728
103.054	C8H6H	Phenylacetylene (= ethynyl benzene)	0.0376469	0.0324435	0.0445958	0.0287982	0.0361227	0.0349124	0.0823115	0.0620373	0.028001	0.0166596	0.0191815	0.0105173	0.0145695		0.0545182	0.0107672	0.0384803	0.0307104	0.0185307	0.00648206	0.0229958	0.00998493	0.00805991	0.00227589	0.00588291	0.0013917	0.0121708	0.00432448	0.0596176		0.0140346		0.0581465		0.0997987		0.0044297	0.000703612	0.00257749
103.075	C5H10O2H	unknown	0.120012	0.0508926	0.11212	0.0405381	0.0903498	0.0483173	0.16693	0.103592	0.112026	0.0429619	0.102566	0.0159771	0.154284		0.0739048	0.0104706	0.0700069	0.0291601	0.0582688	0.00780389	0.063091	0.00884123	0.0281382	0.00633789	0.0198693	0.0016505	0.0589068	0.0193802	0.179993		0.177404		0.0791074		0.260064		0.0595365	0.0189302	0.0175892
103.112	C6H14OH	unknown	0.135221	0.108172	0.0692217	0.0272088	0.0476693	0.0260969	0.0955779	0.056213	0.0587927	0.0262334	0.0590508	0.00717465	0.0782852		0.0443525	0.00805713	0.0450861	0.0243844	0.0231204	0.00233776	0.0248838	0.00290126	0.0118414	0.00309072	0.00770457	0.00072739	0.00841612	0.00599088	0.0937078		0.0924118		0.0304469		0.128803		0.0312919	0.00926803	0.00887574
104.049	C7H5NH	Benzonitrile (benzene nitrile)	0.0214044	0.014202	0.0362942	0.0165183	0.0212415	0.0143458	0.051027	0.0345382	0.02193	0.0061477	0.0477281	0.00868771	0.0270542		0.0439746	0.00865041	0.012191	0.00962405	0.00879133	0.00439687	0.00962122	0.000935805	0.00466585	0.0015118	0.0028098	0.000301256	0.0177503	0.0157535	0.0299883		0.016955		0.0448232		0.0796965		0.00435914	0.00138471	0.000609741
104.107	C5H13NOH	unknown	0.462732	0.24765	0.356945	0.162265	0.297732	0.187128	0.376111	0.196383	0.380467	0.140079	0.364168	0.0227116	0.594946		0.202525	0.024951	0.148473	0.0120382	0.0870847	0.0161645	0.100307	0.0168538	0.0573044	0.0138544	0.0406338	0.00405195	0.0665442	0.0233685	0.880977		1.48832		0.0802421		1.45206		0.261995	0.144588	0.0507938
105.018	C3H4O4H	unknown	0.576791	0.477018	0.351983	0.102365	0.439573	0.33793	0.353207	0.159348	0.584385	0.269706	0.295951	0.0673047	0.831395		0.161208	0.00201206	0.146608	0.0333378	0.127892	0.0341662	0.154465	0.0243772	0.0814889	0.023074	0.0614764	0.008997	0.101901	0.0224019	0.569489		0.730447		0.116369		0.662054		0.270098	0.13373	0.0907558
105.033	C7H4OH	unknown	0.0250948	0.0217304	0.0249608	0.0150511	0.0295268	0.0342398	0.0436812	0.0544172	0.0114053	0.00301247	0.00527371	0.00292181	0.000382675		0.0391256	0.0130123	0.026566	0.012128	0.0188739	0.0110972	0.0259117	0.00936484	0.0347614	0.00812666	0.0442515	0.0160511	0.00961084	0.00449578	0.00848394		0.00144418		0.00207951		0.00791885		0.00183581	0.000577722	0.0085779
105.07	C8H8H	styrene	0.0597568	0.0925044	0.0660018	0.0373079	0.0605767	0.0505007	0.128434	0.0831724	0.0544783	0.0221545	0.047848	0.00864761	0.0529647		0.0460651	0.0102467	0.691001	0.503476	0.00841668	0.00297085	0.00955108	0.000831849	0.00684952	0.0026023	0.00457165	0.000638935	0.00918784	0.00523092	0.0501102		0.0384074		0.0249544		0.0851041		0.0104621	0.00268504	0.00293137
106.065	C7H7NH	vinyl pyridine	0.0619466	0.0205671	0.0545372	0.0219459	0.0457342	0.019377	0.0921026	0.0620517	0.071858	0.0370062	0.0536933	0.00853072	0.0652197		0.0279101	0.00147714	0.103937	0.00270443	0.300256	0.0430173	0.294872	0.0573581	0.146872	0.0408587	0.0998216	0.0272721	0.0911501	0.0240219	0.641047		0.449963		0.0394837		0.402452		0.495772	0.288709	0.0256236
106.078	C8H10	unknown	0.00838963	0.00281619	0.014084	0.00534097	0.0105135	0.0072116	0.0217892	0.0161694	0.0116691	0.00661251	0.013313	0.00130624	0.0162312		0.00808718	0.0010916	0.014631	0.00886048	0.00569234	0.00249727	0.00566506	0.000543587	0.00470029	0.00335978	0.00398361	0.00290506	0.00741666	0.00171065	0.0555906		0.0324478		0.0157354		0.0475809		0.0255479	0.0150914	0.00146166
106.123	C5H15NOH	unknown	0.057631	0.0352684	0.0611786	0.0258447	0.0476128	0.0330884	0.093586	0.0692001	0.0388793	0.0122494	0.0598854	0.0152093	0.0692201		0.057548	0.010016	0.0413081	0.0271678	0.0323954	0.0121873	0.0396688	0.011075	0.0124402	0.00311304	0.00950581	0.00224482	0.0169164	0.00501061	0.0783571		0.0283068		0.0858579		0.121874		0.0107435	0.00148388	0.0069133
106.998	C2H2O5H	unknown	0.00419959	0.00206974	0.00619311	0.00344462	0.00415587	0.00282612	0.00987224	0.011395	0.0063081	0.00398545	0.00362476	0.00103119	0.0107216		0.00418995	0.000707156	0.00339419	0.0014802	0.00121834	0.000290713	0.00112808	0.000470623	0.00136136	0.000386938	0.00109814	0.000336342	0.00276827	0.00138094	0.0136446		0.00990145		0.00914971		0.0160677		0.00312689	0.00150459	0.00101406
107.049	C7H6OH	benzaldehyde	0.0163109	0.0131156	0.0169387	0.00743859	0.00913626	0.00466105	0.0218627	0.0169663	0.0109308	0.00394517	0.0229716	0.00637747	0.0176782		0.0202673	0.00431731	0.00870337	0.00702999	0.00445993	0.00228125	0.00491647	0.000425924	0.00223501	0.000852103	0.0014088	0.000186687	0.0036469	0.00288708	0.0122517		0.00816356		0.0272491		0.041485		0.00215351	0.000593643	0.000539968
107.07	C4H10O3H	unknown	0.357491	0.209309	0.243201	0.0954503	0.233362	0.170089	0.277159	0.134267	0.348448	0.160749	0.247613	0.0311926	0.413362		0.110601	0.00389483	0.101964	0.00900913	0.0642324	0.0121546	0.0728295	0.0182282	0.041202	0.0104874	0.0278089	0.00364396	0.035442	0.00541937	0.289932		0.190278		0.0450836		0.42149		0.164692	0.0881556	0.0506119
107.086	C8H10H	m+p-xylene (68%), o-xylene (23%), ethylbenzene (10%)	0.011345	0.00834709	0.0112462	0.00404648	0.00713465	0.00283311	0.0154988	0.0114344	0.00938379	0.00361606	0.0168728	0.00609245	0.0151471		0.0114164	0.00201507	0.00238605	0.00154924	0.00383045	0.00196267	0.00444355	0.000209169	0.00192167	0.000723082	0.00121254	0.000243174	0.00190528	0.00148852	0.0137508		0.00540939		0.0214695		0.0295661		0.00126397	0.000115962	0.000363564
108.011	C2H6NO2S	unknown	0.131931	0.0997925	0.274319	0.114431	0.106643	0.060757	0.235882	0.141515	0.11225	0.0410393	0.408734	0.0521386	0.0676068		0.394	0.0474767	0.040348	0.0237439	0.0368302	0.0171726	0.034631	0.00107786	0.012654	0.00376847	0.0083011	0.00127419	0.210325	0.185576	0.0527971		0.0381611		0.177442		0.302364		0.014012	0.00222213	0.00393097
108.044	C6H5NOH	methyl furonitrile (~33%), nitrosobenzene ~33%), pyridine aldehyde (~33%)	0.710485	0.29808	0.825505	0.327276	0.639353	0.416414	1.14092	0.594556	0.557285	0.116834	0.479431	0.0284365	0.703061		0.911095	0.11939	0.625855	0.255119	0.432136	0.114887	0.495028	0.0489979	0.256912	0.0487884	0.19861	0.037559	0.388638	0.11679	1.34775		1.34352		0.546752		1.78948		0.534759	0.184721	0.136465
108.066	C3H9NO3H	unknown	0.0060908	0.0102961	0.013623	0.0110681	0.00513789	0.0122415	0.00119328	0.00157182	0.0154848	0.0150549	0.00149582	0.00211541	0		3.20712e-05	4.53556e-05	0.00368094	0.00443311	0.00172377	0.00243778	0.00367334	0.00513467	0.00124256	0.00215217	0.00153533	0.00212713	0	0	0		0		0		0		0	0	0
108.081	C7H9NH	dimethyl + ethyl pyridine (~50%), heptyl nitriles (~50%)	0.000141631	0.000119165	0.000129997	0.000123893	0.000175586	0.000163608	0.000302208	0.000239055	9.88894e-05	0.000113114	6.73893e-05	3.87074e-05	0.000344497		0.000334747	0.000119967	0.000228939	0.000189754	9.52058e-05	8.64499e-05	5.77881e-05	5.06692e-05	0.000126772	3.03926e-05	6.20782e-05	1.31818e-05	0.000268137	0.000193174	0.000618031		0.000832338		0.000179427		0.00156647		0.000130113	6.03589e-06	3.42096e-05
109.028	C6H4O2H	Quinone (=p-Benzoquinone)	0.0103726	0.00218572	0.01246	0.00412104	0.00938513	0.00386209	0.0185819	0.0189565	0.015371	0.0069216	0.00951168	3.03953e-05	0.0223516		0.00868174	0.000348465	0.0073531	0.00280878	0.00476341	0.00125449	0.00593372	0.00119619	0.00356106	0.000871318	0.00291063	0.000567863	0.00723965	0.00334388	0.0185618		0.0468172		0.00827102		0.0448481		0.00949525	0.00343278	0.00218276
109.065	C7H8OH	cresols (= 4-methylphenol) (50%), anisole (50%)	0.00963076	0.00238328	0.0115078	0.00447153	0.0081116	0.00405386	0.0140025	0.00852908	0.00796967	0.000898044	0.00530149	0.00131279	0.0170721		0.00937771	0.000714374	0.0104196	0.00456097	0.00404294	0.000993868	0.00429579	0.00114522	0.00265994	0.00123209	0.00296447	0.00130679	0.00597366	0.00279004	0.0241311		0.0337662		0.00340155		0.0139332		0.00867292	0.00716874	0.0033664
109.101	C8H12H	unknown	0.000462894	0.000374096	0.00120473	0.00109921	0.000549003	0.000186177	0.01139	0.0232805	0.00682123	0.00758588	0.0008886	0.000219507	0.00259275		0.000368875	7.76838e-05	0.000719717	0.000133522	0.000519297	0.000139949	0.000481627	0.000140526	0.000419897	0.00011447	0.000342835	1.4717e-05	0.000369299	0.000205612	0.000524169		0.00137291		0.00666785		0.0513461		0.000139669	8.64882e-05	0
110.036	C6H5O2H	unknown	0.00487646	0.0016713	0.00629967	0.00487876	0.00333604	0.00124402	0.0128351	0.0162028	0.0068686	0.003425	0.00603467	0.00158747	0.0182855		0.00131318	9.15214e-06	0.00329554	7.09341e-05	0.00437674	0.000441774	0.00378437	0.000722959	0.0019871	0.000758161	0.00195151	0.000757423	0.00414221	0.00185775	0.0182972		0.0220522		0.0055607		0.0225134		0.00500266	0.0043341	0.0023708
110.06	C6H7NOH	unknown	0.0206036	0.0110574	0.0255169	0.0104746	0.0176875	0.0106152	0.0979432	0.153776	0.0530246	0.0422649	0.019753	0.00211334	0.0483349		0.016441	0.00113525	0.0212067	0.00899227	0.0099787	0.00243302	0.0121694	9.70468e-05	0.00708211	0.00207281	0.00424131	0.000627461	0.0217146	0.012949	0.0598266		0.0932288		0.0296237		0.303802		0.00662448	0.00297816	0.00396737
110.096	C7H11NH	C7_acrylonitriles (~50%), C3_pyrroles (~50%)	0.000694881	0.000256027	0.000864641	0.000201655	0.000713443	0.000339592	0.0012101	0.000737296	0.000754421	0.000302231	0.000402048	3.34834e-05	0.00104691		0.000689416	2.65111e-05	0.000405982	0.000278011	0.0002437	0.000155837	0.000287753	9.61054e-05	0.00013683	6.45987e-05	0.000172165	0.000117222	0.000417752	0.000273973	0.00180403		0.00156231		0.000678259		0.00357987		0.000221767	8.80331e-05	0.000177191
111.044	C6H6O2H	methyl furfural (~50%), benzene diols (=catechol+resorcinol) (~50%), 2-acetyl furan	0.00469487	0.0035368	0.00411427	0.00166671	0.00380961	0.00184563	0.00311449	0.00277232	0.00205049	0.00245986	0.000972567	0.000112623	0.00895622		0.00332111	6.23639e-05	0.00125282	0.00158796	0.000427661	0.000439312	0.000337134	0.000318958	0.000370192	0.000538436	0.000649724	0.000738257	0.00233539	0.00163287	0.00786083		0.00704596		5.69468e-05		0.000735275		0.00209294	0.00133227	0.00237928
111.08	C7H10OH	C3_furans (55%), other compounds (45%)	0.0298344	0.0117994	0.0276652	0.00753173	0.0212568	0.0131644	0.0418982	0.0278039	0.024066	0.00992186	0.0168528	0.00102301	0.0389156		0.0188601	0.0073987	0.0266008	0.00332456	0.0151216	0.00149311	0.0169771	0.00245392	0.00886211	0.00223038	0.00807067	0.00153087	0.0195262	0.00963874	0.0419593		0.0610549		0.0270944		0.0521193		0.0227485	0.00655574	0.00923583
111.117	C8H14H	unknown	0.00369938	0.00201395	0.00442801	0.00178982	0.00458559	0.00377158	0.00482598	0.00154323	0.00232025	0.000535501	0.00108166	0.000172338	0.00283441		0.00666343	8.46387e-05	0.00506111	0.00248681	0.00224899	0.000641652	0.00298377	0.000302506	0.00257513	0.000255351	0.00230315	0.000623318	0.0041033	0.00210941	0.00624656		0.0024899		0.00214231		0.00728558		0.00106711	0.000407929	0.00125672
112.039	C5H5NO2H	dihydroxy pyridine (~50%), methyl maleimide (~50%)	0.000534642	0.000398223	0.000899448	0.000704383	0.000869633	0.00110513	0.00111517	0.000841695	0.00033358	0.000129777	0.000290699	0.000164301	0.000959377		0.00149752	0.000163695	0.00111785	0.000525415	0.000184887	1.63772e-05	0.000191464	1.99753e-05	0.000318825	0.000270146	0.000347801	0.0003918	0.000776152	0.000238843	0.00184048		0.000901152		0.000734483		0.0013641		0.000469219	0.000188905	0.000382511
112.076	C6H9NOH	unknown	0.00153624	0.000766093	0.00208745	0.000816863	0.0013066	0.000843183	0.00176986	0.000636884	0.0022643	0.000976485	0.000740796	8.5616e-05	0.00104749		0.00182011	0.000160071	0.00145193	0.000211749	0.00111484	0.000144384	0.0013434	0.000577532	0.000648353	0.000282859	0.000624544	0.000198586	0.00142023	0.00089068	0.0017687		0.0011722		0.000745458		0.00120613		0.000404597	0.000158482	0.000333466
112.088	C7H12O	unknown	0.0130146	0.0086867	0.0166226	0.00597377	0.0124151	0.00794407	0.0344969	0.0426801	0.021007	0.0125941	0.00753887	0.00250482	0.0284053		0.0195061	0.00361147	0.0164459	0.00358861	0.0104099	0.00207291	0.0123773	0.00041742	0.0088974	0.00146709	0.00760167	0.00126769	0.0195122	0.00900201	0.0266		0.0220899		0.0252455		0.125517		0.00349548	0.000587391	0.00257532
113.023	C5H4O3H	5-Hydroxy 2-furfural, 2-furoic acid	0.199733	0.170963	0.186004	0.116555	0.291668	0.259528	0.472229	0.402604	0.076984	0.019474	0.111759	0.0119321	0.0677655		0.340786	0.0613612	0.1516	0.101459	0.0479786	0.0165651	0.0572172	0.0113733	0.026665	0.00590542	0.0197395	0.00346245	0.0394476	0.0171158	0.149577		0.0972913		0.0420951		0.232773		0.0412108	0.0141138	0.0144605
113.06	C6H8O2H	2-hydroxy-3-methyl-2-cyclopenten-1-one	0.00674456	0.00169173	0.00724367	0.00162995	0.00619258	0.00340325	0.00498396	0.0025211	0.00523972	0.00228188	0.00317877	5.06171e-05	0.00614305		0.00653923	0.000739974	0.00555705	0.00207469	0.00347669	0.000668686	0.00380963	0.000892701	0.00288802	0.000548816	0.00216356	0.000388548	0.00514459	0.00210365	0.0116977		0.0169868		0.00180102		0.00574393		0.00498681	0.00274701	0.00131889
113.096	C7H12OH	ethyl cyclopentanone	0.0199215	0.00635063	0.0245985	0.0112884	0.0166895	0.00645242	0.0436853	0.0446119	0.0245827	0.00952833	0.0208619	0.00306017	0.0596441		0.0149354	0.00106349	0.0142603	0.00572163	0.0110273	0.00193327	0.0122471	0.000979254	0.00619695	0.00300729	0.00538831	0.00172341	0.0152199	0.00532141	0.0423721		0.068492		0.0142138		0.0719457		0.0168298	0.0111855	0.00558371
113.132	C8H16H	unknown	0.0124746	0.00781257	0.0173971	0.0121246	0.00982846	0.00727674	0.00910602	0.00655235	0.0138589	0.00652651	0.00501266	0.00355985	0.00986043		0.00643842	0.00039175	0.00618727	0.000456084	0.003209	0.000182835	0.00489791	0.00388192	0.00150793	0.00159083	0.003322	0.00283949	0.00637854	0.00473773	0.0105373		0.00632766		0.000823258		0.000660441		0.00329321	0.00363561	0.00604309
114.019	C4H3NO3H	nitrofuran	0.254805	0.1216	0.369099	0.141248	0.262937	0.205046	0.596318	0.397301	0.242437	0.0915133	0.290589	0.0084245	0.36727		0.369911	0.0589258	0.21669	0.114947	0.120111	0.0443255	0.128087	0.0162464	0.0796436	0.0224759	0.0568716	0.00724912	0.11363	0.0576412	0.46148		0.405464		0.341386		0.821495		0.156708	0.0719619	0.033579
114.037	C5H8NS	unknown	0.029257	0.0192448	0.0346034	0.0163009	0.0302033	0.021475	0.0669333	0.0600964	0.0448158	0.0234144	0.017796	0.001472	0.0412161		0.0256638	0.00204425	0.0241276	0.0132238	0.0117787	0.00469856	0.0147982	0.000776555	0.00901721	0.00213343	0.0051934	0.000861166	0.0175052	0.0116476	0.0550573		0.0806985		0.0181371		0.221173		0.00763128	0.00231682	0.00215488
114.055	C5H7NO2H	unknown	0.0735254	0.0296745	0.112943	0.0460315	0.0730379	0.056324	0.180341	0.136357	0.0811401	0.0344675	0.0821147	0.0195492	0.160636		0.103943	0.0121463	0.0702745	0.0338256	0.0257882	0.0102287	0.0282525	0.00271711	0.0190841	0.00696069	0.0137776	0.00404812	0.0432302	0.0231065	0.194967		0.232562		0.187407		0.324968		0.0733291	0.0370037	0.0120799
114.091	C6H11NOH	unknown	0.00680861	0.00225809	0.00914498	0.00333688	0.00609966	0.00278965	0.014441	0.0113812	0.00841841	0.00319477	0.00426296	0.0010086	0.0144349		0.00594809	0.000118165	0.00494545	0.00200743	0.00332311	0.000714767	0.00407875	0.0010642	0.00262565	0.000964125	0.0022781	0.000496226	0.00429864	0.00222478	0.015821		0.0243525		0.00893112		0.0291855		0.00477262	0.00330501	0.00266107
114.128	C7H15NH	unknown	0.00273911	0.00140818	0.00328235	0.00140769	0.0020576	0.00138796	0.0107143	0.0155127	0.00626707	0.00416897	0.00207789	0.00111541	0.0061137		0.00244463	0.00060334	0.00579058	0.00231384	0.00115807	0.000121333	0.00121229	0.000250413	0.00152938	0.000417163	0.000747234	0.00015598	0.00311234	0.00217071	0.0149003		0.0128954		0.00300601		0.0681042		0.000887012	2.9317e-05	0.000323554
115.039	C5H6O3H	5-hydroxymethyl-2[3H]-furanone	0.0208202	0.00863708	0.025055	0.0117175	0.0146574	0.00574649	0.0256192	0.0179058	0.0193213	0.00453714	0.0173006	0.00382086	0.0508207		0.0109044	0.00227718	0.0145022	0.00141808	0.00743872	0.00147278	0.01019	0.00476625	0.00505175	0.00246682	0.00574029	0.0020618	0.0110081	0.0071501	0.0555918		0.0322427		0.00507458		0.0419954		0.0265719	0.0248156	0.00799467
115.075	C6H10O2H	C6 diketone isomers (46%), C6 esters (54%)	0.0187951	0.0125072	0.0190621	0.0131639	0.0166236	0.0134872	0.0365034	0.0308715	0.00633577	0.00345203	0.013806	0.00977429	0.0435806		0.0236058	0.00080804	0.0235128	0.0052697	0.00793805	0.00081179	0.00836122	0.00201867	0.00680913	0.00323124	0.0050451	0.00337911	0.0192173	0.00479486	0.088225		0.179633		0.0157977		0.0774547		0.0504183	0.0293588	0.00896776
115.112	C7H14OH	heptanal (63%), 2,4-dimethyl-3-pentanone (24%), heptanone (13%)	0.00362084	0.000935655	0.00528164	0.00113777	0.00401526	0.00193191	0.00648733	0.00466706	0.00499733	0.00136482	0.00184016	0.000635183	0.00667017		0.00362324	0.00034915	0.00392453	0.00159239	0.00275553	0.000758835	0.00359768	0.00137118	0.002354	0.000647451	0.00191322	0.000452729	0.00370416	0.0022967	0.00470682		0.00363989		0.00244251		0.00889445		0.000955204	0.00012407	0.00146379
116.034	C4H5NO3H	unknown	0.00673251	0.00448637	0.00861177	0.00370594	0.00552244	0.00337339	0.0353675	0.0565869	0.0203385	0.0164896	0.00631592	7.28704e-05	0.0167522		0.00438532	0.000590048	0.00703009	0.00273023	0.00299711	0.000799769	0.00359562	0.000137096	0.00215135	0.000664621	0.00118456	3.82546e-05	0.00759585	0.00468146	0.0151361		0.0170707		0.00921127		0.104548		0.000203929	4.03862e-05	0.000689456
116.071	C5H9NO2H	unknown	0.00689109	0.004297	0.0110361	0.0032197	0.00709641	0.00489646	0.00883026	0.00524048	0.00467723	0.0019401	0.0019212	0.000379775	0.0144206		0.0123815	0.00106202	0.00792035	0.00395053	0.00416553	0.000376658	0.00623458	0.00334811	0.00405596	0.00257011	0.00315927	0.000783787	0.0109734	0.00780791	0.0237702		0.0166967		0.000379648		0.00359075		0.00556481	0.00613673	0.00870532
116.107	C6H13NOH	unknown	0.00120319	0.00131075	0.00129117	0.000758131	0.00100914	0.000851189	0.00200749	0.00168255	0.00101212	0.000822857	0.000212526	1.4748e-05	0.0013457		0.000621573	4.76761e-05	0.00108771	0.000652615	0.00021286	4.37712e-05	0.000398888	8.17278e-05	0.000665846	0.000190165	0.000255887	8.4007e-05	0.000819043	0.000510997	0.00231035		0.00177432		0.000253381		0.00922655		0.000260356	6.05835e-05	0.000317083
117.018	C4H4O4H	unknown	0.000558316	0.000352382	0.000849591	0.000255069	0.000467691	0.000296603	0.00138302	0.00107647	0.000722948	0.000378851	0.000396075	8.55627e-05	0.00133509		0.000892294	8.79116e-05	0.000642401	0.000240731	0.000310823	1.99523e-05	0.000378828	0.000277817	0.000151761	9.70119e-05	0.000177746	0.00012229	0.000556297	0.000464305	0.00216889		0.00128412		0.000341526		0.00149263		0.000221806	0.000313681	0.000259816
117.055	C5H8O3H	2,5-Dihydroxymethyl dihydrofurfural, C5 3-oxy 2-DBE isomers	0.0725271	0.0302087	0.0657646	0.018091	0.0661668	0.0369852	0.0784806	0.0324143	0.0481916	0.0170661	0.0344072	0.000795302	0.0743339		0.0571435	0.0162157	0.0385455	0.0106556	0.0297111	0.00709402	0.0369354	0.0095169	0.0163366	0.00354592	0.0156592	0.00118457	0.0395471	0.0278266	0.139839		0.17646		0.0133911		0.0839255		0.0552209	0.021748	0.0182658
117.07	C9H8H	indene (96%), methyl ethynyl benzene (4%)	0.0928678	0.0682999	0.13053	0.0772399	0.119537	0.11854	0.228111	0.166108	0.0892164	0.029819	0.076017	0.00980775	0.0820567		0.132185	0.0179282	0.0755887	0.0463748	0.0990939	0.0366008	0.131246	0.00844364	0.0298913	0.00647679	0.0215596	0.00469397	0.0856575	0.0641582	0.128804		0.060364		0.0853008		0.290783		0.0320832	0.0170533	0.0101155
117.091	C6H12O2H	butyl ester acetic acid, other C6_esters	0.000476778	0.000336447	0.000759139	0.00046719	0.000798786	0.000943242	0.00138757	0.00135174	0.000347889	0.000171878	0.000385013	0.000254748	0.00113156		0.00124287	5.14118e-05	0.000731306	0.000375338	0.000190697	9.99113e-06	0.00020183	2.37014e-05	0.000154695	0.000105927	0.000130736	7.07088e-05	0.000653055	0.000403437	0.00155456		0.00101063		0.000677215		0.00229395		0.000382313	0.000217517	0.000178709
117.127	C7H16OH	unknown	0.0148121	0.0077007	0.0139666	0.00766156	0.0145104	0.0112207	0.015028	0.0147946	0.0178438	0.00976321	0.00991894	0.00428609	0.0152444		0.0046718	0.00257143	0.00766695	0.00481537	0.00625836	0.00201	0.00915456	0.000459184	0.00262624	0.00101972	0.00246688	0.00090883	0.00925966	0.00596588	0.0106418		0.0181376		0.000409877		0.0421726		0.00557736	0.00215217	0.000866632
118.013	C3H3NO4H	unknown	0.05247	0.0253987	0.0576298	0.0238477	0.0579256	0.0407573	0.109124	0.0824953	0.0541536	0.021613	0.0433675	0.000101807	0.0760571		0.057853	0.00560592	0.0449383	0.0168059	0.030677	0.00511435	0.0353016	0.00298636	0.0173485	0.00244196	0.0131971	0.00192735	0.0399516	0.0190224	0.0889912		0.0952723		0.053111		0.177503		0.0267777	0.00966791	0.0127231
118.05	C4H7NO3H	butene nitrates	0.0081497	0.00631479	0.00891176	0.00473362	0.00573544	0.00384431	0.0283322	0.042151	0.0104556	0.00628234	0.00633532	0.00105781	0.0139127		0.00940473	0.000643207	0.0101095	0.00442493	0.00483794	0.0011077	0.00639176	0.00146821	0.00333486	0.000528436	0.00237075	0.000423786	0.00797834	0.0029524	0.0159107		0.0180073		0.0140279		0.0660208		0.00215098	0.000247064	0.00142297
118.065	C8H7NH	Benzeneacetonitrile (benzyl nitrile)	0.0139689	0.00993527	0.0133967	0.00859291	0.00962976	0.00924739	0.0143949	0.0139132	0.0158278	0.00777089	0.0128766	0.00677303	0.0500309		0.00169982	2.39293e-05	0.00584492	0.00114975	0.00406215	0.000644714	0.00552099	0.00389089	0.0026452	0.00250078	0.00268545	0.00118663	0.00311456	0.000656466	0.0313929		0.0372752		0.000977582		0.0198595		0.00986769	0.0101049	0.00421148
119.034	C4H6O4H	unknown	0.316323	0.205586	0.381738	0.180364	0.462649	0.421588	0.716895	0.534705	0.201496	0.061383	0.292784	0.0228133	0.254705		0.536671	0.0886612	0.354776	0.232091	0.108573	0.0366539	0.121478	0.0244446	0.0601259	0.018153	0.0404163	0.00497092	0.0958879	0.0477669	0.4236		0.261258		0.200586		0.642869		0.0916661	0.0294919	0.0197508
119.049	C8H6OH	benzofuran	0.0358084	0.0138227	0.0361208	0.0172209	0.0259909	0.0141035	0.0338706	0.0204325	0.0239201	0.00731106	0.0298759	0.00542512	0.137535		0.0147222	0.00134134	0.0204071	0.00502966	0.0153397	0.00353804	0.018624	0.00655528	0.008394	0.0042144	0.0077627	0.00231584	0.0170637	0.00348371	0.0902619		0.112658		0.0268032		0.0208722		0.0346524	0.0254249	0.0173991
119.07	C5H10O3H	unknown	0.196383	0.0649432	0.251893	0.105503	0.177096	0.108678	0.357213	0.234703	0.162888	0.0611572	0.22214	0.0193696	0.49753		0.207659	0.0242026	0.178344	0.0911311	0.0738039	0.0286533	0.0825764	0.00330123	0.0457517	0.0140007	0.0317638	0.00670204	0.091503	0.0367611	0.454262		0.521867		0.316429		0.620768		0.158921	0.092373	0.0449756
119.086	C9H10H	Indane (13%), MethylStyrene (84%), propenyl benzene+methyl ethenyl benzene (3%)	0.027661	0.0139811	0.0372484	0.0104028	0.0297461	0.0187592	0.0399233	0.0258488	0.0359685	0.0130397	0.0134354	0.00255343	0.0397483		0.0341666	0.00650083	0.0222695	0.0126361	0.0153653	0.005466	0.019612	0.00469711	0.0114147	0.00298575	0.00885516	0.00235601	0.0305053	0.0220095	0.0375619		0.0525173		0.0272493		0.104071		0.00764151	0.00402152	0.00396839
120.044	C7H5NOH	unknown	0.0147925	0.0129878	0.0192637	0.00895032	0.0144742	0.0124641	0.0599323	0.0746255	0.03479	0.025612	0.0113338	0.00146319	0.0177025		0.0141897	0.00135164	0.0152803	0.00875684	0.00627733	0.00208483	0.00862125	0.000117472	0.00622738	0.00149884	0.00328362	0.000247537	0.0124418	0.00914282	0.034262		0.0432364		0.0133876		0.234742		0.00223467	2.39579e-05	0.000869288
120.066	C4H9NO3H	unknown	0.0435089	0.0181681	0.0475176	0.0197665	0.038283	0.018827	0.0401945	0.0168006	0.0304829	0.0198991	0.033431	0.00177598	0.0868853		0.0332414	0.00614118	0.0262775	0.00680268	0.0183224	0.00258399	0.0232301	0.00536521	0.0129431	0.00304015	0.00968974	0.00183718	0.0281892	0.0129602	0.090838		0.0928245		0.0272552		0.0768453		0.0349125	0.0288918	0.0136915
120.081	C8H9NH	dihydro pyridine	0.0811138	0.0431539	0.0909118	0.0197055	0.0819891	0.0433122	0.0486324	0.0325739	0.0614776	0.0317175	0.0424455	0.0309043	0.0430411		0.0816057	0.0149365	0.0414765	0.0116158	0.0960528	0.0240367	0.126468	0.0689998	0.0450144	0.0158123	0.0422077	0.0136798	0.0644205	0.0273327	0.0526983		0.0199579		0.0703847		0.0097955		0.00477061	0.00417435	0.0220556
120.093	C9H12	unknown	0.044093	0.0253833	0.0470907	0.0257197	0.0354713	0.0205265	0.0794803	0.0613723	0.0282596	0.00886303	0.0506219	0.0173687	0.117376		0.037452	0.00330786	0.0344427	0.00898318	0.0138279	0.00282979	0.0157238	0.00302606	0.0115899	0.00444887	0.00852189	0.00399824	0.028402	0.00985554	0.153659		0.271893		0.0482505		0.162135		0.0930476	0.0442649	0.0144005
120.138	C6H17NOH	unknown	0.0289417	0.0181298	0.0346931	0.0133206	0.025858	0.0180961	0.072633	0.0846423	0.0547512	0.0389499	0.0216262	8.46164e-06	0.0587497		0.0225231	0.00447004	0.0152288	0.00856673	0.0124754	0.00563382	0.0162858	0.00032782	0.00703029	0.00201052	0.00488532	0.0014934	0.0259706	0.0215456	0.0318092		0.0413048		0.0562902		0.224865		0.00168739	0.000500087	0.00341601
121.013	C3H4O5H	unknown	0.00557724	0.0041713	0.00693844	0.00258366	0.00440592	0.00278559	0.0291521	0.0443827	0.0190946	0.0146964	0.00531941	0.000233093	0.0121097		0.00361779	0.000641794	0.0083055	0.00192145	0.0019959	0.000319056	0.00312227	0.000614929	0.00244866	0.000631944	0.00140317	0.000443535	0.00414267	0.00260719	0.0132908		0.0133062		0.0118691		0.145284		8.81122e-05	4.28117e-05	0.000272486
121.05	C4H8O4H	unknown	0.00522897	0.00191605	0.00501585	0.00145109	0.0039036	0.00161495	0.00706202	0.00449971	0.00508016	0.0018228	0.00486071	0.000142897	0.00941522		0.0030578	0.000105745	0.00263917	0.000458987	0.0021072	0.000709635	0.00266979	0.00058492	0.00142849	0.000321868	0.00104526	0.000150706	0.00367638	0.0022064	0.010678		0.0118117		0.00442833		0.0116774		0.000806055	2.40817e-05	0.000624988
121.065	C8H8OH	tolualdehyde (~100%), acetophenone, dihydro benzofuran	0.00145088	0.000929001	0.00172112	0.000850919	0.00140567	0.000867287	0.00784568	0.0129424	0.00360294	0.00270514	0.00115177	0.000386732	0.00377743		0.00149717	0.000323705	0.00204614	0.00097819	0.000554026	9.04325e-05	0.000571797	2.60073e-05	0.000501668	0.000166696	0.000307058	4.16886e-05	0.00143531	0.00107105	0.00801717		0.00672042		0.00241872		0.0432966		0.000575535	3.27354e-05	0.000288419
121.101	C9H12H	C9 aromatics	0.012196	0.00719855	0.0134675	0.00812603	0.0105755	0.00661222	0.0215135	0.016583	0.00662443	0.00210733	0.0140038	0.00592362	0.032046		0.0128128	0.00107665	0.0130289	0.0022807	0.00575601	0.000536673	0.00615471	0.00101872	0.0045963	0.00203502	0.00336187	0.00226315	0.0105132	0.00199769	0.0472199		0.0821399		0.00807584		0.0362696		0.0282965	0.013783	0.00522611
121.122	C6H16O2H	unknown	0.00242701	0.000839171	0.00299817	0.00132207	0.002155	0.000920144	0.00336557	0.00178557	0.00225741	0.000786446	0.00139733	0.000102069	0.0043517		0.0022233	5.5765e-05	0.0013152	0.000757181	0.00112281	0.000437923	0.00156792	0.000370436	0.00064616	0.000325628	0.000678479	0.000261274	0.00198883	0.00146591	0.00481178		0.00468519		0.00107115		0.0063655		0.00123441	0.00075528	0.0011115
122.024	C6H3O2NH	unknown	0.00301044	0.00166718	0.00490543	0.00239941	0.0029668	0.00180509	0.0117338	0.0101109	0.00623345	0.00336767	0.00164445	0.00012081	0.00570839		0.00328772	0.00032602	0.00222633	0.000959323	0.00120717	0.000313709	0.00148304	0.000224007	0.000890767	0.000210193	0.000718996	0.000176447	0.00214003	0.00143054	0.0104108		0.0566558		0.00180346		0.0304605		0.000588575	1.22354e-05	0.000966824
122.045	C3H7NO4H	unknown	0.00799658	0.00492177	0.0102825	0.00424511	0.00638609	0.00382393	0.03371	0.0506194	0.0210304	0.0161153	0.00782692	5.16989e-05	0.0190761		0.00563356	0.000440762	0.00702385	0.00304545	0.00328858	0.000849646	0.00349739	0.000161949	0.0019803	0.000629381	0.00119839	3.19074e-05	0.00711095	0.00522799	0.017547		0.0223803		0.0115312		0.0938428		0.000842015	9.59277e-05	0.000320979
122.06	C7H7NOH	unknown	0.0767122	0.041379	0.0824303	0.0374275	0.0476571	0.0236992	0.160448	0.192188	0.0923444	0.0524678	0.0826021	0.00446707	0.17422		0.0412687	0.00116878	0.181544	0.0148644	0.027813	0.00421714	0.0258937	0.000994242	0.0143523	0.00427297	0.0104267	0.00491891	0.035897	0.0136328	0.161849		0.213853		0.0803516		0.479211		0.0669253	0.0343573	0.0131162
122.081	C4H11NO3H	unknown	0.0107361	0.00842532	0.0118357	0.00795482	0.00986297	0.00753038	0.0179676	0.012411	0.0038724	0.00296624	0.00760816	0.00621972	0.0224078		0.0137554	0.00211001	0.0101205	0.00333341	0.00297501	0.000878312	0.00394749	0.00101371	0.0038906	0.00218006	0.00326244	0.00250205	0.0112914	0.00626575	0.0571264		0.0821278		0.00168489		0.03932		0.0309386	0.0166015	0.00557239
122.096	C8H11NH	unknown	0.00168287	0.00113799	0.00280212	0.00162512	0.00212947	0.00201942	0.00500926	0.00579605	0.00193761	0.0013836	0.00156477	0.00131915	0.00482813		0.00321249	0.000251573	0.00309711	0.00137427	0.000660684	6.22884e-05	0.000818997	9.88686e-05	0.00113427	0.000924161	0.00094777	0.000910567	0.00377612	0.00159825	0.00418312		0.00520376		0.00730258		0.0163076		0.00119822	1.33922e-05	0.00046105
123.044	C7H6O2H	salicyladehyde (~100%), benzodioxole, benzoic acid	0.00380444	0.00152781	0.00515812	0.00161657	0.00400559	0.00265655	0.00571052	0.00482786	0.00149704	0.00133841	0.00230962	0.000256535	0.00979027		0.00554289	0.00161668	0.00286416	0.000946872	0.00134778	7.50772e-05	0.00168992	0.00060021	0.000748392	0.000311683	0.000969731	0.00057391	0.00617687	0.00553042	0.00909497		0.00518704		0.00291273		0		0.00226759	0.00222437	0.00255811
123.08	C8H10OH	4-ethylphenol+dimethylphenol (~50%), methylanisole (~50%)	0.0376725	0.0259837	0.0371717	0.0195018	0.033648	0.0285109	0.0874882	0.100798	0.0454869	0.00407653	0.0175743	0.000673461	0.0253808		0.0130784	0.00318734	0.017946	0.00904306	0.0114437	0.00331471	0.0157458	0.00182616	0.00916077	0.00252533	0.00782236	0.00272116	0.0173938	0.00969039	0.0242316		0.0419966		0.0965704		0.0909666		0.0197794	0.0135119	0.00431111
123.117	C9H14H	unknown	0.00208695	0.000811391	0.00259111	0.00134379	0.00238573	0.00114296	0.00549092	0.00392563	0.00290709	0.00099967	0.00305049	0.000975269	0.00505271		0.00448568	0.000406235	0.00123568	0.000180565	0.00117097	0.000106859	0.00114964	0.000197097	0.000887427	0.000513159	0.000778982	0.000246265	0.000879089	0.00021796	0.00444717		0.00384002		0.0041114		0.00389954		0.0010633	0.000382115	0.00052434
124.039	C6H5NO2H	nitrobenzene	0.000584409	0.000447018	0.000884365	0.000544784	0.000960144	0.00117978	0.00153816	0.00150801	0.00046161	0.00026761	0.000493984	0.000346622	0.00102474		0.00147398	8.54975e-05	0.00107764	0.000522159	0.000178628	8.06998e-07	0.000183069	3.41956e-05	0.000239864	0.000205744	0.00016778	0.000112802	0.00106013	0.000626483	0.00205193		0.00127483		0.000875533		0.00407885		0.000368616	9.69439e-05	0.000194261
124.052	C7H8O2	unknown	0.0018006	0.00109607	0.00274798	0.00166047	0.00132977	0.00139386	0.00306215	0.00175087	0.0025006	0.00143824	0.00112355	0.000328014	0.000714206		0.000938587	0.000557907	0.00227694	2.35858e-05	0.00066908	0.000244085	0.000794959	0.000546948	0.000469598	0.000398247	0.000656397	0.000384374	0.00118781	0.000906048	0.00261817		0.00080993		0.000739713		0.00194687		0.000693479	0.000588596	0.000402303
124.076	C7H9NOH	unknown	0.0131106	0.0132734	0.0184579	0.0135521	0.0215136	0.0266087	0.0402366	0.0393535	0.0127675	0.0101419	0.0208908	0.00131029	0.0403431		0.0257408	6.2014e-05	0.0102605	0.00757675	0.0065924	0.000965784	0.00851796	0.00366218	0.00408005	0.00070532	0.00247754	0.000549303	0.00282046	0.0008835	0.0258721		0.0297649		0.0318769		0.0859497		0.00786134	0.00209026	0.00189969
124.112	C8H13NH	unknown	0.000654781	0.000212073	0.000902341	0.000249381	0.000570122	0.00031313	0.00119009	0.000848867	0.000812694	0.000330035	0.000369645	6.81459e-05	0.000800086		0.000618148	8.39745e-05	0.00122842	0.000511892	0.00243498	0.000488595	0.00314897	0.00139997	0.00083255	0.000378847	0.000912926	0.000264427	0.000607248	0.000260181	0.00115672		0.0012612		0.000272697		0.00117553		0.000440606	0.000148847	0.000222515
125.023	C6H4O3H	hydroxy benzoquinone	0.0101787	0.00426801	0.0100244	0.00356315	0.00859212	0.00431178	0.0236086	0.0247126	0.0110132	0.00464203	0.0095449	0.000401707	0.0251435		0.00803594	0.000731002	0.00463687	0.00122082	0.00508325	0.000650735	0.00581954	0.000453431	0.00290081	0.000978975	0.00220928	0.000396068	0.00638674	0.00129353	0.0255885		0.0211766		0.00914612		0.0452024		0.00684193	0.0037744	0.00205658
125.06	C7H8O2H	guaiacol (=2-methoxy phenol) (~100%), propionylfuran, acetylmethylfuran	0.153516	0.0800461	0.191602	0.0783527	0.206112	0.171101	0.373652	0.252953	0.110517	0.0437808	0.179086	0.00353793	0.214572		0.232974	0.0392719	0.152692	0.0995985	0.0752726	0.0274558	0.0864748	0.0021014	0.0385405	0.0118732	0.0269229	0.00336203	0.0663939	0.0402108	0.256364		0.161168		0.135562		0.382474		0.0589035	0.0178103	0.0127445
125.096	C8H12OH	unknown	0.0623136	0.0350096	0.0425174	0.0157314	0.0508971	0.0401712	0.0501613	0.0318895	0.0564134	0.0286191	0.0544809	0.0102213	0.167563		0.0183698	0.00115243	0.0157552	0.00319844	0.0248568	0.0145318	0.0329306	0.00505888	0.00642619	0.00311982	0.00524727	0.0013223	0.00967957	0.00458761	0.062199		0.0864177		0.0154426		0.0372168		0.0285152	0.0157545	0.00738755
125.107	C7H12N2H	unknown	0.0200575	0.0120716	0.022747	0.00800906	0.0171698	0.0105259	0.0711646	0.0995632	0.05389	0.0408408	0.0205389	5.33969e-05	0.0403853		0.0114264	0.00112303	0.0161511	0.00522629	0.0105047	0.00270677	0.0149103	0.000563084	0.0108927	0.00240638	0.00518105	0.000576909	0.0146384	0.00526637	0.0472006		0.065556		0.0273176		0.331756		0.00687854	0.00198395	0.0023291
125.132	C9H16H	unknown	0.106585	0.0398504	0.125081	0.0532024	0.0994381	0.0589215	0.1825	0.123512	0.085173	0.0344752	0.130832	0.0246885	0.302401		0.090233	0.00907274	0.0698802	0.0279216	0.0694935	0.0357717	0.0896868	0.00856154	0.0245057	0.00828538	0.0176953	0.00452493	0.0465985	0.022028	0.212948		0.251926		0.138053		0.321003		0.0750666	0.0308521	0.0190267
126.019	C5H4NO3	unknown	0.00686396	0.00637818	0.00916902	0.00445002	0.00608359	0.00469242	0.0364523	0.04872	0.0193635	0.0137266	0.00618306	0.000217487	0.00884543		0.00685958	0.00100524	0.0084339	0.00342437	0.000847286	0.000200257	0.000496039	0.000137338	0.00281142	0.000538636	0.00154093	8.4335e-05	0.00730209	0.004184	0.024722		0.0296715		0.00714265		0.176157		0.00112043	0.000238928	0.000554157
126.037	C6H8NS	unknown	0.0044537	0.0022295	0.00475607	0.00141944	0.00335799	0.00236497	0.00342178	0.00191845	0.00534421	0.00243984	0.00446074	0.000646374	0.0114816		0.0017788	0.000129961	0.00173212	4.29787e-05	0.00210887	0.000389906	0.00264361	0.00126704	0.00105449	0.000180776	0.000859124	0.00019038	0.00194584	0.00137195	0.00358893		0.00310312		0.00461919		0.00238557		0.000725995	1.88811e-05	0.000459991
126.055	C6H7NO2H	unknown	0.0296045	0.0124794	0.0308077	0.0153218	0.0240685	0.015444	0.0560872	0.045087	0.0224712	0.0090842	0.0331302	0.0105185	0.0730394		0.0221136	0.0015174	0.0249222	0.00380434	0.0111137	0.00167404	0.0117654	0.00182835	0.00804225	0.00285535	0.00621543	0.00361087	0.0168134	0.00415737	0.0998933		0.159124		0.0321172		0.119421		0.0487019	0.0224019	0.00850891
126.091	C7H11NOH	unknown	0.00688263	0.00202668	0.00674103	0.00319044	0.00421607	0.00145525	0.0111941	0.012851	0.0057374	0.00260561	0.00574625	5.41442e-05	0.0211418		0.00298514	0.00017473	0.0033476	0.00122519	0.00249903	0.000719638	0.00306731	0.000674724	0.00150649	0.000549747	0.00125877	0.000301783	0.00332665	0.00201943	0.0242977		0.0296691		0.00436247		0.0409716		0.00526546	0.00326421	0.00127309
126.104	C8H14O	unknown	0.0136718	0.00810632	0.0184409	0.00804443	0.0121714	0.00770227	0.059061	0.0897248	0.0425391	0.0356828	0.0156034	0.000707779	0.0409811		0.0109076	0.00148835	0.0103758	0.00507009	0.00594573	0.00201483	0.00809811	0.000346246	0.00467786	0.00124938	0.00278177	0.000437155	0.0125948	0.00862789	0.0268211		0.0318649		0.0380283		0.2037		0.00112855	0.00010541	0.00147146
126.128	C8H15NH	C8 nitrile	0.00265453	0.00151909	0.00329056	0.00126139	0.00220869	0.00126548	0.0127833	0.0173126	0.00688781	0.00500078	0.00208049	0.000171752	0.00520412		0.00170043	0.000133558	0.00333608	0.000826572	0.00100523	0.000311323	0.00110251	0.000150236	0.000894295	0.000208894	0.000491902	4.49205e-05	0.00192548	0.00127772	0.00636235		0.00577121		0.00425928		0.0557729		0.00015054	3.4582e-05	0.00023302
126.97	C2H6S3H	dimethyl trisulfide	0.000699904	0.000406094	0.000978582	0.000638851	0.000749327	0.000421898	0.00448805	0.00797619	0.00146166	0.00107629	0.00082846	0.000185827	0.00285171		0.000752107	0.000161136	0.000908571	0.000467705	0.000339658	6.9837e-05	0.0003996	3.94031e-05	0.000288778	9.78548e-05	0.000201209	4.321e-05	0.000889438	0.000655984	0.00253379		0.00301793		0.00238837		0.0214605		0.000265007	3.47423e-05	0.00016891
127.039	C6H6O3H	5-Methyl hydroxy 2-furfural	0.00434296	0.00156756	0.00582595	0.0020221	0.00443224	0.00252594	0.00713205	0.00465495	0.0055189	0.00184508	0.00198176	0.000493861	0.00779554		0.00538557	0.000169072	0.00398065	0.00208214	0.00263643	0.000593366	0.00349801	0.000901741	0.00193571	0.000692928	0.0016809	0.000358399	0.0051434	0.00367524	0.00665539		0.00716626		0.00324476		0.00954707		0.00117612	0.000470662	0.00214542
127.075	C7H10O2H	unknown	0.00306127	0.00197326	0.00384921	0.00118858	0.00317966	0.00249809	0.00925878	0.00843619	0.00463196	0.00256454	0.00141849	0.000204081	0.00373027		0.00379182	0.000242639	0.00288151	0.00164818	0.0017948	0.000624078	0.00233482	0.000150459	0.00121718	0.000295105	0.00101074	0.000197074	0.00251497	0.00149516	0.00617277		0.00791027		0.00273574		0.0319659		0.000396354	1.1602e-05	0.000689506
127.112	C8H14OH	unknown	0.0061968	0.00434089	0.00708931	0.00297926	0.00488722	0.00325074	0.021665	0.0294031	0.0139257	0.00996326	0.0056183	0.000133139	0.0110914		0.00385586	0.000351269	0.00466388	0.00203283	0.00226755	0.000688754	0.00253543	2.10894e-05	0.001403	0.000429457	0.000756426	3.82267e-05	0.00448406	0.00354097	0.0128477		0.0137565		0.0067639		0.0670923		0.000846333	2.07024e-05	0.000274816
127.148	C9H18H	unknown	0.0213282	0.00795787	0.0223964	0.0101714	0.0166814	0.0101681	0.0175043	0.00637251	0.0142685	0.0051783	0.0123661	0.00312394	0.0307439		0.0135022	0.00246365	0.0109726	0.000598332	0.0138013	0.000395182	0.0186831	0.00962217	0.00725026	0.00193014	0.00819512	0.00120765	0.0146127	0.00903413	0.0319044		0.0346089		0.0135461		0.0197073		0.0225926	0.0172492	0.0094866
128.062	C10H8	unknown	0.0208729	0.0138141	0.0172701	0.00948525	0.0141222	0.0103546	0.0222789	0.0139014	0.00691195	0.00562079	0.0135187	0.00853498	0.0254662		0.0182758	0.00181381	0.0159068	0.00379643	0.00703261	0.00107061	0.00771225	0.00164313	0.00654161	0.00312041	0.00520486	0.00405353	0.0136844	0.00322977	0.0933517		0.207884		0.0028202		0.0559374		0.0647094	0.0429949	0.00823709
128.071	C6H9NO2H	unknown	0.00112265	0.00034782	0.00129367	0.000335063	0.000832368	0.000441489	0.00172174	0.000945986	0.00117799	0.000359431	0.000588504	1.97114e-05	0.00120305		0.00117264	9.04364e-05	0.00120725	0.000449276	0.000538273	9.99312e-06	0.000591541	0.000137412	0.000361377	0.000133728	0.000403613	0.000178843	0.00179875	0.00117887	0.00186365		0.00163416		0.000595327		0.00176327		0.000792664	0.000466654	0.00042933
128.107	C7H13NOH	unknown	0.035751	0.015952	0.0282069	0.00831538	0.0286957	0.0115291	0.0329753	0.019575	0.0154822	0.00454958	0.01382	0.00157941	0.0452427		0.0169599	0.00133567	0.00776373	0.00252137	0.0102677	0.00275431	0.0139329	0.00276546	0.00616824	0.00121888	0.00660719	0.00180883	0.0229566	0.018615	0.0406444		0.0329631		0.0161061		0.0199673		0.0135718	0.00665171	0.00892557
128.143	C8H17NH	unknown	0.00984416	0.00750922	0.0127602	0.00732517	0.013302	0.0126275	0.0214355	0.0158209	0.0094365	0.00417714	0.00973431	0.00044182	0.0143758		0.0164167	0.00165867	0.0087262	0.00576593	0.00557101	0.000892495	0.00691024	0.00188236	0.0036181	0.000388912	0.00234374	0.000165411	0.00389887	0.00108082	0.0179636		0.0188588		0.0114562		0.0477797		0.00486524	0.000749602	0.0021335
129.055	C6H8O3H	2,5-di(hydroxymethyl)furan, methyl hydroxy dihydrofurfural	0.0112067	0.00671074	0.0122492	0.00438644	0.0110799	0.00907852	0.0189254	0.0177042	0.014133	0.00780441	0.00625701	1.23194e-05	0.011525		0.00898752	0.0011367	0.00893546	0.00565522	0.00465721	0.00170497	0.00628053	0.000242678	0.00372912	0.000758733	0.00246842	0.000557058	0.00845182	0.0046048	0.02144		0.0267436		0.0139524		0.0572771		0.00268704	0.00116249	0.00095126
129.07	C10H8H	Naphthalene	0.00460136	0.00311374	0.00626435	0.00320222	0.00510718	0.00457048	0.00856874	0.00559173	0.0042839	0.00171838	0.00326187	2.7763e-05	0.00409385		0.00306315	0.000192583	0.00262484	0.00105828	0.00240397	0.000830422	0.00310561	0.000157264	0.00139145	0.000370885	0.00109704	0.000310319	0.00245206	0.00141594	0.021197		0.0276772		0.00193556		0.0236168		0.00215439	0.00139171	0.000488793
129.091	C7H12O2H	unknown	0.00146349	0.000784816	0.00170222	0.000495485	0.00132561	0.000778715	0.00286996	0.00231267	0.00206195	0.00101601	0.00150508	0.000445157	0.00258601		0.00167983	6.8297e-05	0.000976624	0.000247796	0.000823809	0.0001445	0.000845192	3.01557e-05	0.000623555	0.000159904	0.00039199	4.48909e-05	0.00112171	0.000714507	0.00330221		0.00217086		0.0022215		0.00502965		0.000335017	1.39115e-05	0.000209136
129.127	C8H16OH	unknown	0.000379932	0.000256704	0.00055556	0.000314051	0.000506831	0.000496098	0.00103003	0.00114402	0.000339362	0.000162728	0.000328222	0.000231358	0.000781213		0.000450339	8.14048e-06	0.00055244	0.000218427	0.000128472	9.33955e-06	0.000143144	2.79961e-05	0.000148163	8.13353e-05	0.000104648	4.28575e-05	0.000930417	0.000598682	0.00185511		0.0022178		0.000656339		0.00363852		0.000311775	0.000139248	0.000111751
129.164	C9H20H	unknown	0.00508658	0.00251806	0.00636326	0.00259065	0.00434536	0.00363253	0.00524983	0.00234455	0.00438933	0.00285619	0.00222036	0.000359298	0.00434254		0.00318074	0.000803598	0.00313969	0.00125053	0.00156978	0.000140061	0.00209252	0.000697185	0.00105385	0.000381128	0.000929318	0.000317105	0.00358365	0.00215732	0.00669185		0.00122029		0.00209066		0.00297456		0.00208146	0.00179423	0.000794193
130.013	C4H3NO4H	unknown	0.0208597	0.0110766	0.0266776	0.0143283	0.0258875	0.0257127	0.0317227	0.0189976	0.0150039	0.00617467	0.0168107	0.00135964	0.0318848		0.0176371	0.00187106	0.0105536	0.00526584	0.0109246	0.00218264	0.0136855	0.000449669	0.00693773	0.000949737	0.00475876	0.000536797	0.019597	0.0118134	0.080362		0.102205		0.011376		0.0758118		0.0224597	0.0105085	0.00527556
130.05	C5H7NO3H	unknown	0.00709127	0.00553281	0.0135662	0.00696042	0.0143134	0.0205903	0.0131795	0.0105745	0.00459358	0.00216487	0.00488427	0.00458638	0.012748		0.0029887	0.00163801	0.00357871	0.0014769	0.00309701	0.000930861	0.00391396	4.71312e-05	0.00234164	0.00163423	0.00191576	0.000592896	0.0167304	0.01173	0.0647796		0.0883857		0.00184718		0.066278		0.00965983	0.00508995	0.00212265
130.065	C9H8N	unknown	0.0023112	0.00094049	0.00239482	0.000621644	0.0020331	0.00117817	0.00338083	0.00322549	0.00227462	0.000686968	0.00112641	0.000204028	0.00271155		0.0014375	0.000222975	0.00118254	0.000653481	0.000838489	0.000201109	0.00105352	0.000306761	0.000632212	0.000262327	0.000462755	0.000130791	0.00190774	0.000995891	0.0027081		0.00250535		0.00268874		0.00280227		0.00135751	0.00102036	0.000331471
130.123	C7H15NOH	unknown	0.0047972	0.00264106	0.00588078	0.00261664	0.00488828	0.00363378	0.00976286	0.00889494	0.00416218	0.000184583	0.002452	4.81104e-05	0.00489816		0.00345613	7.22063e-05	0.00304013	0.00150957	0.00219149	0.000588841	0.00274569	7.58116e-05	0.00152333	0.000317398	0.00135854	0.000458095	0.00534033	0.00377573	0.00862381		0.0117233		0.00710548		0.0128273		0.00239125	0.00170195	0.000982979
131.034	C5H6O4H	unknown	0.0126186	0.00511397	0.0141372	0.00288654	0.0109986	0.00620711	0.0302289	0.0364012	0.022502	0.0138329	0.0091407	0.000253997	0.0237232		0.0124648	0.000409439	0.0129144	0.00653071	0.00579402	0.00137375	0.0079719	0.000433831	0.00545187	0.00137024	0.00410284	0.000827868	0.0129453	0.00579239	0.0245954		0.0284242		0.0181364		0.0855325		0.00432867	0.00135704	0.00170087
131.049	C9H6OH	unknown	0.00343319	0.00111553	0.00354087	0.00185077	0.00249302	0.000946665	0.00820482	0.00876472	0.00482028	0.00201736	0.00363778	0.00114131	0.0102959		0.00243765	0.00015067	0.00259498	0.000362951	0.00204019	1.18218e-05	0.00193846	2.31021e-05	0.00130721	0.000258331	0.0010438	0.000166581	0.00184974	0.000309534	0.00454275		0.00370977		0.00440084		0.0112889		0.00211381	0.000875788	0.000901226
131.07	C6H10O3H	unknown	0.00678399	0.00627172	0.00671986	0.00416563	0.00524327	0.00437669	0.0329786	0.052629	0.0159747	0.0121663	0.00634929	0.000106873	0.00783262		0.0037449	0.000678332	0.00665375	0.00341823	0.00307847	0.00089043	0.00399715	0.00114661	0.00215791	0.000732575	0.000838211	0.000144469	0.00415446	0.00147546	0.0158114		0.0123146		0.00896994		0.127652		0.000967799	1.92511e-05	0.000286781
131.086	C10H10H	Dihydronaphthalene	0.0901059	0.0548182	0.11148	0.0456023	0.138738	0.114727	0.244655	0.160491	0.0631723	0.0244709	0.109595	0.00689762	0.11424		0.134876	0.0218515	0.0890003	0.0578998	0.0364364	0.0168367	0.0442856	0.00258103	0.0199688	0.00587905	0.0134771	0.00183769	0.0345736	0.0225208	0.130517		0.0914606		0.112688		0.257099		0.0360761	0.0172607	0.00747052
131.107	C7H14O2H	unknown	0.0438357	0.033146	0.0203908	0.0125194	0.0380264	0.0513558	0.0227318	0.0143509	0.0470815	0.029967	0.0470644	0.00761184	0.0946612		0.00681522	5.68996e-05	0.00519883	0.00234015	0.00463599	0.000728674	0.0051868	0.000430831	0.00234076	0.000457682	0.00120845	0.00051186	0.00100715	8.72662e-05	0.0174634		0.0172912		0.00508553		0.0224373		0.015476	0.00482266	0.00138175
131.143	C8H18OH	unknown	0.00734142	0.00510812	0.00880818	0.00340068	0.0066325	0.00487458	0.0301999	0.0409376	0.0214517	0.0163828	0.00715957	0.000973715	0.0113892		0.00498837	0.000602306	0.00708039	0.00233114	0.00406304	0.00132031	0.00557489	8.21795e-05	0.00326456	0.000601835	0.00169624	0.00010626	0.00679039	0.00321546	0.0196257		0.0254847		0.00941207		0.151659		0.00152596	8.93797e-05	0.00100427
131.993	C3HO5NH	unknown	0.00642237	0.00303015	0.00741266	0.00292377	0.00440629	0.00190274	0.0283473	0.044641	0.0129437	0.00856533	0.00716847	0.000930827	0.0201246		0.00465731	0.000612063	0.00518235	0.00162858	0.00228515	0.000428641	0.00267819	0.00021326	0.00168422	0.000422311	0.0010781	0.000328514	0.00463851	0.00274652	0.0170261		0.0150198		0.00954074		0.0792565		0.00200846	0.000743516	0.00066316
132.044	C8H5ONH	unknown	0.0578686	0.0410845	0.0898223	0.0446206	0.0714392	0.0578938	0.21164	0.17789	0.044618	0.0250535	0.0845311	0.00847834	0.103096		0.0893326	0.00861432	0.0760602	0.044132	0.0599544	0.00629406	0.056408	0.0050144	0.0255278	0.00617923	0.0175448	0.00533604	0.0448718	0.00750727	0.264157		0.34856		0.0786211		0.357836		0.0796328	0.0394446	0.0104659
132.066	C5H9NO3H	unknown	0.0201352	0.0250721	0.0160926	0.0127755	0.0114889	0.016914	0.00815291	0.00492742	0.0279735	0.0301088	0.0086618	0.00427015	0.0269819		0.00359686	0.000658681	0.00519039	0.00277808	0.00251588	0.00055603	0.00282602	0.00157734	0.00161967	0.00034531	0.00227147	0.00102585	0.00336539	0.00196481	0.0110042		0.00908765		0.0066006		0.00131864		0.0060703	0.000999186	0.00405647
132.081	C9H9NH	MethylBenzeneAcetonitrile	0.0586142	0.0399017	0.0523739	0.0272659	0.0468189	0.0188187	0.0912776	0.0707193	0.048445	0.0219883	0.0714925	0.0208419	0.193689		0.0379481	0.002705	0.0310247	0.00500504	0.0129009	0.00334698	0.0144583	0.000571566	0.00969914	0.00379428	0.00690236	0.00368839	0.0178714	0.00665725	0.115829		0.158238		0.0600539		0.166989		0.0512894	0.0252831	0.0110345
133.013	C4H4O5H	unknown	0.00624552	0.00336694	0.00575725	0.00183908	0.00856292	0.00458651	0.00761782	0.00309546	0.00488564	0.0024818	0.00419608	0.0012752	0.00936609		0.00259272	0.000122833	0.00227208	0.000851673	0.00590435	0.00172334	0.00880945	0.00160015	0.00152302	0.000467757	0.000936456	0.00018426	0.0022416	0.000757694	0.00980746		0.00837283		0.00155498		0.00384318		0.00525456	0.00216718	0.00112189
133.05	C5H8O4H	unknown	0.0118118	0.00398228	0.0123552	0.00551862	0.0171125	0.0124708	0.0237106	0.0108915	0.0122696	0.00591654	0.0155958	0.00370686	0.0282356		0.00417969	0.000284452	0.00357622	0.00134151	0.0129724	0.00450489	0.019654	0.00186868	0.00243136	0.000899874	0.00201416	0.000514736	0.00378942	0.00183464	0.0209662		0.022543		0.00605186		0.043027		0.00691882	0.00189397	0.00121059
133.065	C9H8OH	Methylbenzofurans	0.00769892	0.00455891	0.0134742	0.00604664	0.0073199	0.0047868	0.0407537	0.063574	0.0395815	0.0342809	0.0059625	0.000841996	0.0217539		0.00802955	0.0012135	0.00773302	0.00378377	0.00256223	0.00102695	0.00319791	0.00049443	0.00342069	0.000827613	0.00211268	0.000298669	0.00792152	0.00518277	0.0214162		0.0418761		0.0226226		0.251195		0.0011069	0.00014602	0.00103657
133.101	C10H12H	EthylStyrene (~50%), butenyl benzene isomers (~50%), MethylIndane	0.00270429	0.002513	0.0038441	0.00176094	0.00336441	0.002921	0.0148115	0.0191542	0.00499824	0.0029586	0.00275395	0.000371112	0.00349612		0.00202196	0.000242939	0.00307338	0.00127654	0.00142525	0.000583481	0.00175277	8.52511e-05	0.00112769	0.000210278	0.00059985	3.81831e-05	0.00239652	0.00148045	0.00989961		0.00861673		0.0040857		0.0895954		0.000319971	6.44992e-05	0.000273565
134.06	C8H7NOH	unknown	0.00250423	0.0013321	0.00284215	0.00096893	0.00178518	0.00128543	0.00423967	0.00280612	0.00601104	0.00391148	0.00356334	0.000396268	0.00652834		0.00159294	4.57867e-05	0.00162492	0.000306994	0.000913175	0.000236248	0.0012948	0.000223058	0.000576242	0.000158583	0.000373859	7.07142e-05	0.00144881	0.000833021	0.00434777		0.00514398		0.00284157		0.00457143		0.000408823	2.80177e-05	0.000197688
134.096	C9H11NH	unknown	0.129834	0.0439536	0.120732	0.0448986	0.0911821	0.072767	0.195753	0.144051	0.129227	0.0838783	0.0967438	0.0207646	0.169687		0.0973309	0.00935491	0.11827	0.0304186	0.086251	0.00318956	0.0716691	0.0113863	0.0506506	0.0108601	0.036841	0.0144415	0.0695804	0.0095842	0.468251		0.87247		0.0412483		0.455395		0.199645	0.107085	0.0303618
134.154	C7H19NOH	unknown	0.0630049	0.03297	0.073022	0.0313636	0.097124	0.0758166	0.13025	0.0660797	0.051304	0.0255977	0.0809127	0.0112956	0.166328		0.0403687	0.00392504	0.0287808	0.0142082	0.0240922	0.0107096	0.0309978	0.000945912	0.0106958	0.00321708	0.00818751	0.00121228	0.0235232	0.0131072	0.167132		0.114427		0.0485351		0.126557		0.0507183	0.0176696	0.0126976
135.029	C4H6O5H	unknown	0.00821933	0.00501336	0.00928887	0.0050947	0.00442466	0.00378642	0.0189328	0.0175256	0.00929249	0.00368179	0.00917219	0.00227164	0.0191367		0.00908715	0.000645878	0.0104432	0.00210733	0.00419643	0.000190939	0.00352989	0.000584878	0.00324451	0.00122373	0.00241249	0.00143311	0.00654597	0.00164508	0.0386138		0.066775		0.0242558		0.0523326		0.0145927	0.00780266	0.00266287
135.044	C8H6O2H	unknown	0.00515337	0.00372415	0.00659005	0.0018863	0.0026434	0.00307415	0.0105951	0.00963196	0.00477151	0.00264355	0.00119444	0.000263687	0.00631289		0.011787	0.00112541	0.0101362	0.00519164	0.00273263	0.00111257	0.00318716	0.00049561	0.00559289	0.000771884	0.0058636	0.0019226	0.00626092	0.00335462	0.0101441		0.00761297		0.00386083		0.0225175		0.00100065	0.000426657	0.00210513
135.08	C9H10OH	chavicol, methyl acetophenone, ethenyl methoxy benzene	0.00484908	0.00310162	0.00661557	0.0025567	0.00299562	0.00206415	0.0209485	0.0320313	0.0144402	0.0115267	0.00464183	0.000119986	0.0134822		0.00305129	0.00011626	0.00357606	0.0015025	0.0022447	0.000582222	0.00284646	7.41567e-05	0.00139675	0.000487156	0.000855653	5.26965e-05	0.00401952	0.00232609	0.013468		0.0187347		0.00960177		0.0868128		0.000528049	4.28274e-05	0.000786898
135.117	C10H14H	C10 aromatics (92%), fragments on this mass subtracted	0.00121821	0.00068037	0.00150855	0.0005705	0.000783303	0.000620701	0.00546121	0.00821593	0.00324181	0.00215164	0.00116205	0.000103835	0.00218472		0.000889102	0.000103607	0.00107318	0.000450696	0.000389623	0.000103169	0.000425264	3.83083e-05	0.000290274	8.51812e-05	0.000174191	4.01874e-06	0.000755243	0.00056536	0.00354428		0.00387037		0.00125641		0.0252093		0.000145916	1.22373e-05	0.000118299
136.039	C7H5O2NH	unknown	0.000555564	0.000245264	0.000762426	0.000346935	0.000416259	0.000182172	0.00235746	0.00352556	0.000819372	0.000459528	0.000575941	9.87203e-05	0.00162097		0.000700551	2.15545e-05	0.000741223	0.000230093	0.000304746	5.50633e-05	0.000350924	1.94786e-05	0.00026769	4.26693e-05	0.000249686	0.000114751	0.000591288	0.000326189	0.00177719		0.00195286		0.00106108		0.00968138		0.000220837	5.40554e-05	0.000212998
136.06	C4H9NO4H	unknown	0.0187281	0.0105703	0.0392432	0.0181669	0.0289374	0.0243528	0.0553908	0.0370802	0.0235022	0.0213277	0.0196038	0.0107283	0.0447034		0.0310823	0.00473837	0.0151286	0.0102242	0.00585299	0.000711004	0.00510417	0.00281569	0.00345993	0.00216568	0.00244366	0.00205539	0.00851806	0.00502027	0.0420557		0.0655915		0.021146		0.0566123		0.0166295	0.0100986	0.00220781
136.076	C8H9NOH	unknown	0.0240685	0.0111356	0.0309054	0.0156352	0.0215905	0.0139978	0.0510798	0.0502647	0.0229122	0.0121449	0.0329799	0.00988758	0.0830502		0.0215079	0.00293087	0.0187431	0.00697685	0.00627863	0.00158863	0.00738374	0.0018256	0.00612687	0.00458843	0.00496767	0.00473757	0.0147476	0.00692438	0.0874278		0.0780765		0.0203033		0.0853089		0.0349504	0.0142551	0.00855058
136.112	C9H13NH	unknown	0.00616794	0.00455245	0.00760597	0.00555319	0.00737842	0.00740566	0.0114647	0.00331006	0.00196647	0.000428727	0.00355434	0.00129832	0.00836233		0.0148321	0.00297354	0.0114072	0.00398071	0.00417779	0.00145561	0.00501117	0.000986399	0.00458745	0.00126141	0.00455327	0.00248439	0.00604031	0.00212502	0.0142524		0.00957663		0.00417607		0.0114389		0.00388851	0.00132983	0.00381713
137.006	C7H4OSH	unknown	0.00102525	0.000349241	0.00118023	0.000523313	0.000807354	0.00032928	0.00135854	0.000615792	0.00100123	0.000246063	0.000613322	2.53306e-05	0.00160369		0.000872174	9.06175e-05	0.000927945	0.000257331	0.000356495	5.47245e-05	0.000404559	0.000113995	0.000354476	0.000140428	0.000389183	0.000154229	0.000794014	0.000450673	0.00176989		0.00177102		0.000411648		0.00193686		0.000707784	0.000492881	0.000566963
137.023	C7H4O3H	unknown	0.0058618	0.00238544	0.00765006	0.00221264	0.00638873	0.00402156	0.0105162	0.00719804	0.00803005	0.00336149	0.00308738	6.88514e-05	0.00945535		0.00678198	0.000282219	0.0058156	0.00232232	0.00320733	0.000842636	0.00390788	8.24854e-05	0.00329729	0.000278414	0.00258146	0.000650789	0.00482763	0.00269736	0.0129688		0.0147078		0.0045057		0.0317216		0.00154315	0.000401768	0.00183108
137.06	C8H8O2H	Methylbenzoicacid	0.0112764	0.0089051	0.0110337	0.00518447	0.0130299	0.0132095	0.0205967	0.0179816	0.0146221	0.00901176	0.00225256	8.24573e-05	0.00458654		0.0134588	0.0022568	0.0168152	0.00979541	0.00563885	0.00183282	0.00749518	0.00154701	0.00532196	0.000534377	0.00313267	0.000775395	0.0113565	0.00657043	0.0157682		0.00792161		0.0112325		0.0640915		0.000577856	0.000194846	0.00101582
137.096	C9H12OH	unknown	0.000936903	0.000471554	0.00120293	0.000363649	0.000810773	0.000468597	0.00435207	0.00700851	0.00282902	0.00203126	0.000838012	9.1225e-06	0.00210229		0.000606042	0.000140749	0.000850293	0.000393688	0.000263822	4.69522e-05	0.000306906	3.88547e-05	0.000225341	9.90868e-05	0.000141312	3.20488e-05	0.000711387	0.000453288	0.00231995		0.00204548		0.00245857		0.0153302		0.000148444	1.81012e-05	0.000140884
137.132	C10H16H	monoterpenes	0.037485	0.0156321	0.0423162	0.01805	0.0323562	0.0122792	0.0385773	0.0159248	0.0235179	0.0071173	0.0277894	0.00510045	0.0848731		0.0214565	0.00444676	0.0124321	0.00387648	0.0117047	0.00219141	0.0162707	0.00546768	0.00824742	0.0019704	0.00797095	0.00152778	0.0234819	0.0177399	0.0517375		0.0646722		0.0290383		0.035769		0.0231151	0.011027	0.0132944
138.019	C6H3O3NH	unknown	0.0458716	0.0182047	0.0469305	0.024441	0.0452046	0.0334496	0.0499745	0.0291868	0.0315997	0.00984378	0.0151342	0.00221993	0.020043		0.0526151	0.00617854	0.0545638	0.0119293	0.0318068	0.00637165	0.0324175	0.000755326	0.0345281	0.00298427	0.0298951	0.00490772	0.114846	0.0969033	0.0537214		0.0331086		0.0068718		0.0416346		0.020654	0.00718731	0.0160004
138.055	C7H7NO2H	nitrotoluene	0.0391796	0.0123725	0.0427985	0.0172803	0.0345664	0.0138069	0.0522666	0.0317951	0.0297997	0.0174047	0.0531378	0.00376572	0.096744		0.0222879	0.00283063	0.0220175	0.00779754	0.0193691	0.00570468	0.0217825	0.00221223	0.0112164	0.00232247	0.00783617	0.00147405	0.0170598	0.00694176	0.0912042		0.119514		0.00913356		0.0804662		0.0358229	0.0163497	0.0161516
138.076	C4H11NO4H	unknown	0.0128403	0.00524124	0.0267624	0.019461	0.00911702	0.00463835	0.0322314	0.036151	0.0258794	0.0141454	0.0301828	0.0062713	0.0575829		0.00712956	0.000600042	0.00526309	0.00107567	0.00473128	0.00160525	0.00392707	3.76565e-05	0.00404731	0.000938597	0.00283483	0.000538874	0.00814856	0.00642017	0.0275207		0.0205383		0.0235775		0.0635467		0.0177568	0.0115406	0.00243558
138.091	C8H11NOH	unknown	0.00237369	0.00159697	0.00315139	0.00214218	0.00301817	0.00239769	0.00346765	0.0023302	0.00115959	0.00125917	0.0017156	0.00181045	0.00587308		0.00354327	0.000499529	0.00372305	0.000765847	0.000645705	1.6382e-05	0.000650557	0.000207091	0.00123105	0.000754154	0.00107038	0.000791251	0.00589566	0.00435285	0.00901166		0.00948205		0.00115609		0.00531975		0.00279332	0.000972879	0.00164666
139.021	C7H6OSH	unknown	0.000296462	0.000130419	0.000402264	0.000116338	0.000273232	0.000157339	0.000690312	0.000546354	0.000417027	0.000216895	0.000234056	9.1586e-06	0.000431814		0.000310813	2.74171e-05	0.000365127	0.000114062	0.000149479	5.27818e-06	0.000166574	3.08032e-05	0.000120799	5.12646e-05	0.000125914	5.58551e-05	0.000366129	0.000239849	0.000705111		0.000530708		0.000231051		0.00096923		0.000165364	9.18507e-05	9.5857e-05
139.039	C7H6O3H	unknown	0.00251327	0.00104798	0.00271821	0.000931729	0.00250245	0.00184495	0.00257898	0.000912989	0.00188713	0.000767203	0.000888615	0.000103705	0.00201043		0.00325411	0.000259708	0.00262352	0.00143615	0.00121599	0.00030019	0.00141896	0.000135648	0.00129827	0.000251162	0.000942244	0.000202137	0.0068236	0.00544999	0.00357608		0.00321863		0.000789078		0.00456565		0.000847309	0.000422189	0.000458275
139.075	C8H10O2H	methylguiacol (creosol)	0.00420517	0.00182065	0.00477604	0.00179709	0.00407035	0.00261743	0.00958757	0.00821725	0.00519609	0.00215395	0.00284914	0.000156535	0.00712096		0.00392836	0.000174451	0.00375554	0.00170721	0.00222528	0.00048648	0.00273737	0.000212493	0.00150259	0.000235623	0.00124205	0.000211455	0.0141864	0.012631	0.00980162		0.0116376		0.00428959		0.0250404		0.0016848	0.000772413	0.000625297
139.112	C9H14OH	unknown	0.00191146	0.000941201	0.00284091	0.00114724	0.00120727	0.000749775	0.00250064	0.00117316	0.00168934	0.00100094	0.000996914	0.000103262	0.00281763		0.00205981	0.000440117	0.00181553	0.000681696	0.000514278	1.57929e-05	0.000689389	0.000359434	0.000442024	0.000292421	0.000585371	0.000346024	0.00422191	0.00411346	0.00407639		0.00202879		0.000514189		0.00162967		0.00110784	0.00116595	0.00140211
139.148	C10H18H	unknown	0.0393785	0.0126798	0.0419617	0.0116263	0.034949	0.0198711	0.0402354	0.0205192	0.0251834	0.0119119	0.0271947	0.00259709	0.0491142		0.0265084	0.00303482	0.0158657	0.00513261	0.0189965	0.00602756	0.025567	0.00470124	0.0119378	0.00231359	0.0099305	0.00134218	0.0362487	0.0296999	0.0810994		0.104216		0.00862797		0.0766221		0.0325173	0.0125334	0.0105072
140.049	C10H5NH	unknown	0.00737796	0.00463248	0.00772232	0.0028114	0.00646712	0.00480466	0.0188624	0.0252947	0.0129908	0.00947822	0.00603755	0.000238779	0.0113559		0.00455817	0.000246251	0.00500377	0.00335334	0.00262378	0.00102495	0.00398159	0.000460102	0.00195092	0.00046533	0.00100261	5.41163e-05	0.00175776	0.000276767	0.0112849		0.011731		0.0108404		0.0687461		0.00120114	0.000380423	0.000459951
140.071	C7H9NO2H	unknown	0.00202857	0.00189276	0.00213556	0.00144104	0.00215804	0.00209407	0.00685148	0.00808941	0.00251451	0.00147395	0.00148106	2.037e-05	0.00203764		0.00234684	0.000215731	0.00256549	0.00151516	0.000827346	0.000184159	0.00112098	0.000305355	0.000660638	0.000223095	0.000292064	2.0774e-05	0.000324826	0.000282666	0.00441187		0.00410266		0.00135811		0.0292521		0.00044497	7.56441e-05	0.00014128
140.107	C8H13NOH	unknown	0.000692243	0.000435987	0.000881662	0.00045646	0.000767288	0.000692724	0.00183577	0.00209563	0.000584572	0.000272825	0.000635976	0.000410559	0.00164545		0.000971526	3.01349e-05	0.000813344	0.000375718	0.000228247	3.32293e-05	0.000277022	1.4657e-05	0.000220435	0.000100368	0.000143256	6.30514e-05	0.00396635	0.00365036	0.00193751		0.00181481		0.00107474		0.00565598		0.000453902	0.000146484	0.000166184
140.143	C9H17NH	unknown	0.00535488	0.00203536	0.00638237	0.00212483	0.00491158	0.00230768	0.00714605	0.00409958	0.00364259	0.000904992	0.00415796	0.000745914	0.00801301		0.00534915	0.00045796	0.00376666	0.000756761	0.0022688	0.0003317	0.00259082	3.89609e-05	0.00180555	0.000225791	0.00166217	0.000393623	0.00437959	0.0024419	0.00988916		0.0128158		0.00414391		0.009463		0.00466599	0.00166176	0.00215392
140.97	C5H3NS2	unknown	0.0739841	0.0253148	0.0706763	0.0268944	0.0661399	0.0385376	0.0859838	0.0412482	0.0529727	0.0204943	0.0479186	0.00893103	0.0803418		0.0568218	0.00294004	0.0476879	0.0239817	0.0471754	0.0135475	0.0538487	0.000639094	0.0256196	0.00425876	0.0199466	0.00407094	0.0656215	0.0382863	0.0935402		0.112236		0.0313649		0.0925885		0.0455011	0.019148	0.0141759
141.018	C6H4O4H	unknown	0.00777281	0.00359508	0.00657937	0.00268538	0.005727	0.00297776	0.00696355	0.00394887	0.00751452	0.00343703	0.00618634	0.000299657	0.0119162		0.00383724	0.000228237	0.00299909	0.000957461	0.0016745	0.000440509	0.0020721	0.000253827	0.00133406	0.00035853	0.000940572	0.00015602	0.0021828	0.000931719	0.0130131		0.0219095		0.00316983		0.0340289		0.00430441	0.00178498	0.00106288
141.055	C7H8O3H	unknown	0.0152602	0.00702167	0.0131534	0.00731762	0.0101503	0.00561647	0.0145744	0.00822333	0.0147283	0.00624248	0.01418	0.00127916	0.0227738		0.00718408	0.000167251	0.00563784	0.000741004	0.00301369	0.000489384	0.00350521	0.000543709	0.00222766	0.000480448	0.0016074	0.00018999	0.00341686	0.00163264	0.0296647		0.0505333		0.00429615		0.0774157		0.0077396	0.00321913	0.00146635
141.091	C8H12O2H	unknown	0.00478654	0.00315213	0.00584609	0.00154328	0.00509388	0.00393925	0.0213882	0.0303113	0.0113617	0.00846955	0.00366911	0.000307064	0.00979782		0.00492473	0.000360473	0.00602778	0.00353836	0.00260151	0.00086697	0.00349909	7.56932e-05	0.00204453	0.000564626	0.00118661	0.000117476	0.00547593	0.00299706	0.0105435		0.00770108		0.00732535		0.0646233		0.000633302	0.000107473	0.000517122
141.127	C9H16OH	unknown	0.00393571	0.00338689	0.00395107	0.00224365	0.00585172	0.00544796	0.0177277	0.0192996	0.00615444	0.00381225	0.00301479	0.000265099	0.00339053		0.00660139	3.40413e-05	0.00261206	0.00128738	0.00107188	0.000279911	0.00128207	0.000303538	0.000756538	0.000256092	0.000358163	3.86252e-05	0.00132057	0.000673819	0.00564846		0.00465697		0.00309747		0.0486749		0.000661207	4.96268e-05	0.000194668
141.164	C10H20H	unknown	0.00425311	0.00239726	0.00427872	0.00150363	0.00308618	0.00261384	0.00445015	0.00211077	0.00456157	0.00358013	0.00291554	0.000276624	0.00541393		0.00202426	0.000334137	0.00252147	0.000493923	0.000998548	3.88661e-05	0.00102562	0.000291881	0.000707523	0.000175266	0.000669083	0.0002316	0.00180671	0.000668582	0.00549946		0.00673748		0.00144794		0.00466499		0.00273109	0.0014147	0.000712252
142.05	C6H7NO3H	unknown	0.00864378	0.00318802	0.00786153	0.00374489	0.00758168	0.00544164	0.00792969	0.00465813	0.00725045	0.00104261	0.00863048	0.00386696	0.0186444		0.0040152	7.05648e-05	0.00566966	0.00286058	0.00412328	0.000857764	0.0053296	0.0015936	0.00284273	0.00128522	0.00219117	0.000559077	0.00840303	0.00440919	0.00753174		0.0109564		0.00203528		0.0107841		0.00617965	0.00535352	0.00110854
142.086	C7H11NO2H	unknown	0.111481	0.0493834	0.101358	0.0354859	0.0839398	0.0339133	0.184492	0.132689	0.120462	0.059569	0.112261	0.012368	0.18615		0.069599	0.00449379	0.0839268	0.0392755	0.0525607	0.00155	0.0525075	0.00744525	0.0226776	0.00538841	0.0158908	0.00487164	0.0407912	0.00271848	0.22931		0.244743		0.0784052		0.329636		0.0778726	0.027458	0.0192664
142.123	C8H15NOH	unknown	0.00175566	0.000609927	0.0019328	0.000757198	0.00174705	0.00115996	0.00212938	0.00112036	0.00192626	0.000662231	0.000855781	0.000125278	0.00174931		0.00123602	7.2644e-05	0.00112312	0.000389637	0.00168368	0.000268125	0.00248955	0.00089581	0.000729075	0.000320944	0.000628196	3.55276e-05	0.0010008	0.000418452	0.00292351		0.00435249		0.00103192		0.00452832		0.0011935	0.000704184	0.000461978
142.935	CH3IH	unknown	0.014675	0.00617003	0.0125266	0.00480021	0.0121974	0.00939109	0.0145095	0.00767926	0.018944	0.0112295	0.0184859	0.00390843	0.0395234		0.00502023	0.000176756	0.00369159	0.000131239	0.00268887	0.000228866	0.00309855	0.000157356	0.00176054	0.000614173	0.00137493	0.000286109	0.00222806	0.000525973	0.0121755		0.0138326		0.00304361		0.0264228		0.00614559	0.00300538	0.00235796
143.034	C6H6O4H	unknown	0.00363587	0.00310764	0.00498864	0.00293787	0.00337249	0.00283849	0.0119891	0.0149061	0.00533173	0.00330055	0.0053748	0.000828576	0.00202364		0.00186169	0.000662861	0.00362354	0.000786622	0.00181843	0.00067472	0.00237692	6.83189e-05	0.00137325	0.000239015	0.000736566	3.25476e-05	0.00274363	0.001192	0.00925328		0.0115726		0.00318961		0.0774483		0.00056905	3.89215e-05	0.000389633
143.07	C7H10O3H	unknown	0.0112873	0.0105037	0.0108566	0.00432285	0.00858379	0.00569464	0.0105706	0.00550823	0.0133152	0.00798295	0.00934423	0.00287246	0.0196515		0.00386463	8.78176e-06	0.00443765	0.000233909	0.00323578	4.65608e-05	0.00358569	0.000399654	0.00201421	7.97124e-05	0.00203117	0.000471056	0.00311074	0.00132019	0.0131497		0.0143584		0.00336265		0.0100045		0.0080282	0.00444113	0.00364565
143.086	C11H10H	Methyl naphthalene	0.129928	0.0480563	0.106212	0.037519	0.107552	0.0785558	0.0883769	0.0528762	0.0626291	0.0462042	0.0405743	0.010129	0.119814		0.0585172	0.000780637	0.0456851	0.0188352	0.0431442	0.0148559	0.0611287	0.0119981	0.0248722	0.00919252	0.0195839	0.00380531	0.0404696	0.014752	0.177407		0.253603		0.0242676		0.102319		0.0971283	0.0502877	0.025489
143.107	C8H14O2H	unknown	0.0288801	0.0229589	0.0525666	0.0246599	0.0412618	0.0338489	0.0952539	0.0740232	0.0233951	0.0160802	0.0319495	0.00512237	0.0337582		0.0470392	0.00646566	0.0533089	0.0390214	0.0222586	0.00523712	0.0209122	0.00176488	0.0101297	0.00254318	0.00721817	0.00115612	0.0172381	0.00749098	0.0965742		0.103626		0.051218		0.163003		0.0282619	0.0188921	0.0028804
143.143	C9H18OH	unknown	0.0389179	0.0253353	0.0363723	0.0184317	0.0301495	0.0147599	0.0632725	0.0423801	0.0349345	0.0219198	0.0477661	0.0168514	0.13232		0.0173366	0.00112191	0.0147063	0.000813273	0.00627009	0.00123265	0.00739572	0.000891023	0.00491401	0.00203125	0.00393379	0.00226629	0.00875217	0.00232419	0.0572962		0.0703036		0.0251742		0.0871885		0.0325453	0.0147339	0.0101645
143.179	C10H22H	unknown	0.00482684	0.0015331	0.0055373	0.00268776	0.00299064	0.00184422	0.00960329	0.00689119	0.00711631	0.00401521	0.0074669	0.0018281	0.0103407		0.00240014	1.90931e-06	0.00641573	0.000350715	0.0174743	0.00254561	0.017486	0.00148632	0.00836121	0.00199213	0.00551772	0.00125353	0.0059848	0.000508319	0.0361955		0.0252316		0.00450215		0.0437677		0.0237125	0.00842537	0.00118663
144.044	C9H5ONH	unknown	0.00459868	0.00308135	0.00765913	0.00317157	0.00500637	0.00371169	0.0229414	0.0361896	0.0190342	0.0161819	0.00561316	0.000943424	0.0102474		0.00448081	0.000252063	0.0036268	0.00207749	0.00123486	0.000583633	0.00161115	3.57525e-05	0.0012217	0.000267307	0.00071947	0.000161794	0.00296519	0.00219134	0.0129315		0.0265211		0.00932981		0.130588		0.000266653	1.0437e-05	0.000442548
144.066	C6H9NO3H	unknown	0.00130761	0.00141109	0.00197738	0.00150059	0.00137789	0.00140642	0.00645612	0.010419	0.00181366	0.00146684	0.00178366	0.000376327	0.00223223		0.00105088	0.000113479	0.000944659	0.000449413	0.000465324	0.000194078	0.000591006	6.15919e-05	0.000371106	9.22465e-05	0.000207926	2.66949e-05	0.000872384	0.000589408	0.00365242		0.00315194		0.00424813		0.0398177		0.000167809	3.16692e-05	9.3373e-05
144.081	C10H9NH	unknown	0.000735491	0.000455937	0.000892333	0.00057929	0.000553158	0.000314141	0.0042829	0.00784142	0.00201761	0.00177831	0.000566247	8.87329e-05	0.00148801		0.000634589	7.89166e-05	0.000693787	0.000194396	0.000580184	7.21181e-05	0.000562012	7.88206e-05	0.000370499	9.1339e-05	0.000258227	5.27983e-05	0.000702263	8.75934e-05	0.0027878		0.00355396		0.00352862		0.0188388		0.000852693	0.000275374	0.000163451
144.138	C8H17NOH	unknown	0.00132616	0.000812065	0.00152004	0.000781257	0.000922563	0.000650261	0.00148943	0.000879139	0.00163536	0.000818556	0.00106455	8.4599e-05	0.00149906		0.000424048	2.50975e-05	0.000922049	1.47221e-05	0.000682309	8.47424e-05	0.000832705	0.000506595	0.000416082	0.00024829	0.000487003	0.000243201	0.000643316	0.000225061	0.00295057		0.00188837		0.000448783		0.00183777		0.00169042	0.00140869	0.000354506
144.175	C9H21NH	unknown	0.00957913	0.00613657	0.00993362	0.00501427	0.00877696	0.0034528	0.00685334	0.00340081	0.00547932	0.00223243	0.00491067	0.00178004	0.0170732		0.00494885	1.50367e-06	0.00292677	0.00236512	0.00285084	8.97766e-05	0.00580397	0.00428128	0.000751199	0.000773754	0.00140592	0.00112535	0.00427527	0.00338945	0.0145753		0.00882976		0.000816447		0.00593159		0.00442109	0.00425108	0.00316133
145.05	C6H8O4H	Levoglucosan pyrolysis product	0.140252	0.0550447	0.115595	0.0406661	0.106241	0.0503738	0.143887	0.0767098	0.122982	0.0571716	0.128217	0.0178974	0.200718		0.053537	0.00364651	0.0628153	0.0134315	0.119415	0.0221351	0.139715	0.0184702	0.0601396	0.0155632	0.0468568	0.0101248	0.0590513	0.00568044	0.34327		0.341943		0.0747836		0.359684		0.236319	0.0959911	0.0248785
145.065	C10H8OH	2-ethenyl benzofuran	0.0422422	0.0110352	0.0442127	0.0135273	0.0334801	0.0206051	0.0819553	0.0539719	0.0456556	0.0265597	0.0388802	0.00216343	0.0565951		0.0319846	0.00333717	0.0347349	0.011764	0.0250526	0.00355827	0.0213216	0.00273203	0.0129104	0.00317496	0.00933601	0.00353118	0.0195652	0.00422835	0.124711		0.21696		0.0199246		0.140012		0.0409794	0.0226844	0.00781
145.101	C11H12H	ethylindene	0.016605	0.00443219	0.026361	0.0109615	0.0158958	0.00820014	0.0377357	0.0286499	0.0206271	0.0112088	0.0233836	0.00173408	0.0372938		0.0139509	0.00133927	0.0106002	0.00528778	0.0100334	0.00354344	0.0109854	0.00080569	0.00539864	0.00150578	0.00421252	0.00111796	0.00860677	0.00406409	0.0471003		0.0299703		0.026427		0.0557073		0.0231217	0.011899	0.00273709
145.122	C8H16O2H	unknown	0.0059971	0.00213493	0.00723124	0.00307616	0.00503379	0.0023282	0.0139687	0.0106961	0.00800223	0.003643	0.00762303	0.00122228	0.0137601		0.0054808	0.000530456	0.00592204	0.00148965	0.00347959	0.000678429	0.00355209	0.000278986	0.002357	0.000645218	0.00179102	0.000708062	0.0039221	0.001076	0.021659		0.0285314		0.0216397		0.0358221		0.00820677	0.00381744	0.00138591
145.159	C9H20OH	unknown	0.00411262	0.00171843	0.0045999	0.00104155	0.00426276	0.00254653	0.00696518	0.00524212	0.00536518	0.00312493	0.00241562	0.000330916	0.00726296		0.00389559	0.000376438	0.00286666	0.00159119	0.00188996	0.000871552	0.00253676	0.000127972	0.00130104	0.000393774	0.00119975	0.000393569	0.00315016	0.00200237	0.00693223		0.00793007		0.00276703		0.0228891		0.00118439	0.000455538	0.00082137
146.096	C10H11NH	unknown	0.00168555	0.000820445	0.00206416	0.000873319	0.00107532	0.000587354	0.00645942	0.00913943	0.00428877	0.00300751	0.00211133	5.95115e-05	0.004354		0.000749479	3.71233e-05	0.00120343	0.000386659	0.00070686	0.00014216	0.000838895	0.000118374	0.000553568	0.00022557	0.000327533	1.27878e-05	0.00109618	0.000572234	0.00629311		0.00588117		0.00298441		0.0293614		0.000348455	8.02232e-05	0.000242869
147.029	C5H6O5H	unknown	0.000557735	0.000292628	0.000756397	0.00034681	0.000512773	0.000248609	0.00254974	0.00372338	0.00142772	0.000935518	0.000600247	4.61674e-06	0.00135085		0.000373742	2.78868e-05	0.000483515	0.000233326	0.000214563	2.18069e-05	0.000212746	9.16574e-06	0.000145143	3.41308e-05	0.000107051	1.97672e-05	0.000353756	0.000251741	0.00149268		0.00175856		0.000651694		0.0122702		0.00012468	2.88521e-05	9.35311e-05
147.044	C9H6O2H	unknown	0.000503937	0.000284589	0.000701104	0.000353729	0.000377126	0.000351512	0.000649775	0.000425279	0.000664124	0.000378845	0.000444073	0.00012033	0.000401137		0.000194709	3.9636e-05	0.000353534	3.40789e-05	0.000177446	1.73327e-05	0.000203013	0.000108398	0.000112351	5.06073e-05	0.000125423	6.30113e-05	0.000176772	0.000119241	0.000732971		0.000406678		0.000214389		0.000466382		0.000323351	0.000196889	0.000115229
147.065	C6H10O4H	unknown	0.0914049	0.0440455	0.0913059	0.0406499	0.1058	0.0897289	0.0818172	0.0278868	0.0598614	0.0247061	0.118195	0.0341302	0.221912		0.0290167	0.00211151	0.0188675	0.0101343	0.0440184	0.0242547	0.0499776	0.00164307	0.00946748	0.00399842	0.00980518	0.00363711	0.0256002	0.0165718	0.0975021		0.116268		0.0133246		0.0809295		0.0520684	0.0166497	0.0226463
147.08	C10H10OH	dimethylbenzofuran, ethyl benzofuran	0.0973569	0.0452542	0.0804738	0.0298729	0.0689046	0.030565	0.138734	0.0957214	0.113214	0.06059	0.0914459	0.00839593	0.176143		0.0354772	0.00287833	0.0395219	0.0059725	0.028684	0.00511214	0.0313656	0.00536098	0.0184577	0.00382327	0.0139553	0.00306463	0.0246761	0.00617923	0.172707		0.285934		0.0232829		0.219256		0.0971725	0.0449197	0.0189249
147.117	C11H14H	unknown	0.0150516	0.0058782	0.0295419	0.0149578	0.0178452	0.00998847	0.0347335	0.023559	0.0184126	0.00952886	0.0252283	0.00158251	0.0495496		0.016836	0.00149396	0.00762555	0.00455678	0.00993588	0.00439014	0.00991804	0.000194855	0.00522613	0.00165527	0.00345327	0.000291874	0.00857769	0.00618938	0.0401778		0.0298644		0.0150967		0.0405494		0.01385	0.00708413	0.00278016
148.039	C8H5NO2H	unknown	0.00865332	0.00386622	0.0115705	0.0063573	0.0069978	0.00395518	0.0211689	0.0226528	0.0114214	0.00715288	0.0100069	0.00223595	0.0256752		0.00621798	0.000949425	0.00547554	0.00204273	0.00177104	0.000370702	0.00158526	0.00065321	0.00162552	0.000912341	0.00135149	0.000820672	0.00414529	0.00192384	0.0250332		0.0258763		0.0149711		0.0309329		0.00898917	0.00444216	0.00219933
148.076	C9H9NOH	unknown	0.00439352	0.002797	0.00569371	0.00329041	0.00468725	0.00437382	0.00973601	0.00541923	0.00241865	0.000522481	0.00364566	0.001236	0.00776109		0.00772355	0.00110007	0.00599976	0.00293406	0.00248722	0.000749353	0.002871	0.000435398	0.00168918	0.000444582	0.00131979	0.000414116	0.00287887	0.000834601	0.012759		0.00921515		0.00510713		0.0132955		0.0034048	0.00157468	0.00144542
148.17	C8H21NOH	unknown	0.0026246	0.000889096	0.00290843	0.000785364	0.00225027	0.00113139	0.00306658	0.00174248	0.00364134	0.00147534	0.00178562	0.00013955	0.00386537		0.00194081	0.000266731	0.00185439	0.000868243	0.00112421	0.000225674	0.0014628	0.000171931	0.000957243	0.000242158	0.000754975	0.000182824	0.00202042	0.00109063	0.00354459		0.00688103		0.00347737		0.011062		0.000903951	0.000388806	0.00043061
149.023	C8H4O3H	unknown	0.00706945	0.00363944	0.0076607	0.00237232	0.00685762	0.00445028	0.0120415	0.00893567	0.0114913	0.00747188	0.00458055	0.000354829	0.00976419		0.00418679	2.73532e-05	0.00469338	0.00266982	0.00253088	0.000963928	0.0036632	0.000114107	0.00233366	0.000583206	0.00129282	0.000178127	0.00348419	0.0019924	0.0158248		0.0192383		0.00772571		0.101571		0.00140174	0.000373002	0.000676191
149.06	C9H8O2H	unknown	0.00479753	0.00394648	0.00492762	0.00250223	0.00465785	0.00431627	0.0097681	0.00916802	0.0054517	0.00330133	0.00241073	0.000249926	0.00463794		0.0044029	0.000678902	0.00495129	0.0027701	0.00216976	0.000742567	0.00282345	0.000738839	0.00151349	0.000283352	0.000842019	8.85057e-05	0.00252128	0.00112254	0.00847095		0.00394358		0.00456968		0.0393927		0.000594415	0.000110989	0.000436195
149.096	C10H12OH	Methyl chavicol (estragole)	0.000507015	0.00019061	0.000700527	0.000242142	0.000466441	0.00026853	0.00236585	0.00370349	0.00159053	0.00110679	0.000525267	9.60625e-05	0.00155021		0.000361163	2.53374e-05	0.000430968	0.000191992	0.000153246	1.59737e-05	0.000153013	1.93087e-05	0.000141219	5.61649e-05	0.000100116	2.44098e-05	0.000358866	0.000244675	0.00140179		0.00159421		0.00224759		0.00986649		0.000172207	5.87003e-05	0.000122992
149.132	C11H16H	C11 aromatics	0.000506706	0.000286275	0.000638783	0.000275986	0.000526851	0.000381856	0.0010964	0.000856254	0.000507453	0.000245321	0.000406904	4.63447e-05	0.00097498		0.000609971	4.08152e-05	0.000614165	0.000281172	0.000229951	5.76922e-05	0.000275729	3.79099e-06	0.000183671	4.84088e-05	0.000126306	2.65566e-05	0.000378237	0.000182029	0.00136706		0.00105403		0.000754735		0.00488608		0.000200056	3.69522e-05	0.000129362
150.055	C8H7NO2H	unknown	0.0336497	0.012462	0.047808	0.0299653	0.0236064	0.0123428	0.0513645	0.0402034	0.0417828	0.0193034	0.0668181	0.00594426	0.155253		0.0121165	0.000286468	0.00853884	0.00197625	0.0116526	0.00503145	0.0121964	0.00084449	0.00500046	0.00108971	0.00376575	0.000544441	0.00929593	0.00566368	0.0574234		0.0557972		0.0442132		0.100279		0.0323094	0.013523	0.00539802
150.076	C5H11NO4H	unknown	0.00704102	0.00573331	0.00790152	0.0055112	0.00706887	0.00397629	0.00956074	0.00670378	0.00227284	0.00103109	0.00906738	0.00377183	0.0291102		0.00685257	0.000549706	0.00560535	0.00263823	0.00178527	0.000248305	0.00223124	0.00024742	0.00135463	0.000658893	0.000981352	0.000437938	0.00396687	0.00168648	0.0143435		0.0175515		0.00922111		0.017407		0.00742926	0.00255425	0.00220872
150.091	C9H11NOH	unknown	0.00486271	0.00362571	0.00514863	0.00219663	0.00380464	0.00332951	0.0147855	0.018329	0.00923505	0.00659564	0.00556703	0.000293631	0.00702098		0.00363097	0.000483143	0.00393476	0.00194206	0.00210281	0.000541818	0.00282133	0.000403967	0.00131652	0.000380286	0.000646475	2.55465e-05	0.00294041	0.00145103	0.010689		0.00741604		0.00554258		0.0664694		0.000751024	0.000103093	0.000187659
150.128	C10H15NH	unknown	0.00396824	0.00140015	0.00509533	0.00199161	0.00344343	0.00138414	0.00555164	0.00294882	0.00368314	0.00139566	0.00309933	0.000266133	0.00768467		0.00361716	1.04734e-05	0.00282027	0.000444607	0.00151224	7.37093e-05	0.00161194	0.000328336	0.00130178	0.000335674	0.00138567	0.000520994	0.00554557	0.00332439	0.00892196		0.00947824		0.00340673		0.00496304		0.00288836	0.00164214	0.00241308
151.024	C4H6O6H	unknown	0.0389301	0.0131329	0.037319	0.0132672	0.0332995	0.0192106	0.0371198	0.0145387	0.0274584	0.0107071	0.0175798	0.00480948	0.0256229		0.0305013	0.000343505	0.0312109	0.0169313	0.0233571	0.0053473	0.0247035	0.00209724	0.0165232	0.0018846	0.0134569	0.00249467	0.146215	0.106806	0.0428744		0.0478486		0.0177693		0.0422947		0.0213742	0.00957701	0.00784047
151.039	C8H6O3H	unknown	0.024817	0.00967697	0.0279632	0.0133796	0.0200134	0.00988396	0.0329565	0.0210151	0.0302689	0.0127167	0.029798	0.00391477	0.0453113		0.012114	0.000279461	0.00963751	0.00128342	0.00889608	0.00193709	0.0117651	0.000686381	0.0218902	0.00498983	0.0159276	0.00261317	0.0100464	0.00378301	0.0414244		0.0732202		0.0145926		0.0579439		0.0213997	0.00311854	0.00656252
151.075	C9H10O2H	vinylguaiacol	0.02548	0.0194424	0.033299	0.0141638	0.0206748	0.0159696	0.0478186	0.0342381	0.0193926	0.00909709	0.0378596	0.00778555	0.0243028		0.0311516	0.00694903	0.0155572	0.0125046	0.00834866	0.00384087	0.00969791	0.00243921	0.00342133	0.00127836	0.00220845	0.000416106	0.00766026	0.00514208	0.0301763		0.0114089		0.0421848		0.0720106		0.00299789	0.000331888	0.000851433
151.112	C10H14OH	unknown	0.00431089	0.00158176	0.00447527	0.000953518	0.00370132	0.00176209	0.00515702	0.00393552	0.00700097	0.00417632	0.00300269	0.000312416	0.00588214		0.00266002	0.0005038	0.00241559	0.00132519	0.00150596	0.000418662	0.00195746	0.000173849	0.00133181	0.000414424	0.000847118	0.000197276	0.00373246	0.00248176	0.00542131		0.00773498		0.00728506		0.0232243		0.00152014	0.000713217	0.000527635
151.148	C11H18H	unknown	0.00603736	0.00419565	0.00565676	0.0020622	0.00438299	0.00317664	0.0145091	0.0175646	0.0102364	0.00718156	0.0052631	4.29645e-05	0.00841411		0.00326188	0.000297046	0.00397558	0.00207664	0.00216079	0.000733786	0.00304552	0.000305326	0.00156095	0.000415565	0.000810181	5.03652e-06	0.00271969	0.00101735	0.00990355		0.00974192		0.0061518		0.0645582		0.000841527	0.000196268	0.000372957
152.034	C7H5NO3H	unknown	0.000666373	0.000363131	0.000754909	0.000354519	0.00061916	0.000413996	0.00169805	0.00188729	0.000629673	0.000310705	0.000742	0.000316597	0.00165883		0.000635355	1.36498e-05	0.000664508	0.000247473	0.000239396	2.94943e-05	0.000281705	5.00906e-06	0.00020041	7.32038e-05	0.000133111	5.26453e-05	0.0005768	0.000251318	0.00175697		0.00191838		0.000988719		0.00588999		0.000434785	0.000146998	0.000142097
152.071	C8H9NO2H	unknown	0.0186973	0.00566726	0.0201487	0.00694903	0.0122731	0.00539518	0.0128295	0.00398481	0.019587	0.00697674	0.0157091	0.00456057	0.0170397		0.0114703	0.00142891	0.00722619	0.00179927	0.0097168	0.00208826	0.0107376	0.00288085	0.00698889	0.00150265	0.00600239	0.00104796	0.00929383	0.00310577	0.0181136		0.0383912		0.0234754		0.0208681		0.0136442	0.00868475	0.00393819
153.055	C8H8O3H	Vanillin, methyl salicylate, C8 aromatic hydroxyacid	0.126858	0.0541228	0.107161	0.040201	0.112154	0.0658196	0.1263	0.0720581	0.103745	0.05038	0.0974388	0.0143072	0.153607		0.0647749	0.00171359	0.0501059	0.0162981	0.0562484	0.0135035	0.0650356	0.000765376	0.0281937	0.00605283	0.0204481	0.00228623	0.242546	0.223965	0.153086		0.19634		0.0488821		0.19656		0.0721076	0.0287819	0.0200593
153.07	C12H8H	acenaphthylene	0.00955286	0.00410542	0.0079773	0.00269369	0.00727698	0.00382303	0.0100882	0.00720909	0.0119951	0.00647854	0.00758772	0.000646479	0.0169352		0.00457268	0.000138857	0.00354133	0.000881914	0.00207379	0.00056354	0.00268217	0.000350273	0.00170273	0.000465652	0.00110961	7.31857e-05	0.00245821	0.000859673	0.0140345		0.018886		0.00537606		0.0411689		0.00469194	0.00234878	0.00112994
153.091	C9H12O2H	unknown	0.0145824	0.00628231	0.0119297	0.00510192	0.0091721	0.00547558	0.0137659	0.00772999	0.0169131	0.00830036	0.0123087	0.00142851	0.0219015		0.00579203	3.69685e-05	0.00516405	9.1786e-05	0.00291152	0.000485399	0.00334486	0.000608323	0.00217835	0.000540019	0.00143262	0.00010912	0.00213722	0.000619008	0.023326		0.0285765		0.00355972		0.045049		0.00669221	0.00327049	0.00135216
153.127	C10H16OH	camphor (30%), other oxygenated monoterpenes (70%) VARIABLE	0.00142317	0.00107286	0.00192965	0.00073395	0.00209606	0.0017898	0.009002	0.0126121	0.00337892	0.0027784	0.00136973	8.40028e-06	0.00296508		0.00158944	0.000288457	0.00259444	0.00143884	0.00103743	0.00030986	0.00141115	0.000178737	0.000757482	0.00016777	0.000419945	2.27612e-05	0.00180794	0.000868533	0.00368865		0.00379944		0.00257092		0.0367858		0.000275108	1.42027e-05	0.000244272
153.164	C11H20H	unknown	0.0010853	0.000756727	0.00133626	0.000545995	0.000918252	0.000664935	0.00584385	0.00997114	0.00284414	0.00197393	0.0010516	4.99817e-05	0.00201945		0.00088336	9.79678e-05	0.000842149	0.000332359	0.000400331	0.000112791	0.000447836	6.28926e-05	0.00028226	8.38906e-05	0.000169944	1.75684e-05	0.000532548	0.000319389	0.00232433		0.00222777		0.00150195		0.0229337		0.000287644	2.16254e-05	0.000100583
154.065	C11H7NH	unknown	0.00817556	0.0062159	0.00715656	0.00215182	0.0050874	0.00291134	0.00655701	0.00284794	0.00746171	0.00509664	0.00504489	0.001569	0.0134245		0.00376374	0.000167426	0.00379506	0.000116461	0.00161053	0.000353436	0.00184301	0.000304677	0.00132732	0.000190199	0.00114135	0.000246315	0.00230709	0.000944506	0.0164901		0.0174299		0.00263139		0.013879		0.00581681	0.00329616	0.0020217
154.086	C8H11NO2H	unknown	0.0367849	0.0212992	0.0297096	0.0110414	0.0309863	0.0166851	0.0257907	0.0169359	0.0282631	0.00870375	0.0214793	0.00921612	0.0360026		0.017192	0.00146451	0.012437	0.00499735	0.0138519	0.00381626	0.0187087	0.00210155	0.00935914	0.00288034	0.00685226	0.0018711	0.0121559	0.00422839	0.027982		0.0253435		0.00726484		0.0210421		0.0185074	0.0085571	0.00576775
154.172	C11H21H	unknown	0.0441228	0.0224995	0.0404338	0.0125196	0.0471324	0.0329358	0.1055	0.067305	0.0336674	0.0250415	0.0413671	0.00228172	0.0525921		0.045558	0.00928786	0.0742895	0.0504318	0.0135735	0.00175575	0.013289	0.00291711	0.0063	0.00235576	0.00420327	0.00140347	0.0102981	0.00167396	0.0388469		0.0146763		0.029128		0.0592448		0.0121774	0.00160713	0.00364025
155.034	C7H6O4H	unknown	0.0333688	0.0156046	0.0398453	0.0184409	0.024051	0.0115987	0.0498778	0.0290841	0.0265033	0.0081226	0.0428403	0.0047476	0.0648006		0.0314221	0.0052418	0.0155929	0.00349029	0.00781158	0.00276828	0.00852964	0.000657037	0.00578176	0.00173135	0.00367971	0.00116229	0.00810624	0.00383173	0.0875018		0.120256		0.032986		0.160486		0.0230518	0.0120005	0.00392344
155.07	C8H10O3H	syringol	0.00388427	0.00299449	0.00274676	0.000851782	0.00279119	0.00163949	0.00246384	0.000992528	0.00386737	0.0016107	0.00182697	0.000288367	0.00690733		0.00146644	0.000121788	0.00103761	0.000150694	0.000740262	0.000157605	0.000972942	0.00022372	0.000648472	0.000271213	0.000580785	0.0002006	0.000922018	0.000258459	0.00437246		0.00590412		0.000990822		0.00297954		0.00193032	0.00125161	0.00072664
155.086	C12H10H	unknown	0.00326144	0.00108019	0.00394348	0.00162784	0.0027355	0.00131027	0.0097573	0.0135492	0.0101875	0.00718237	0.00300283	0.000682481	0.0104458		0.00154953	0.000308384	0.00168943	0.000502933	0.00123647	0.00027781	0.00160495	0.000147414	0.00100254	0.000268208	0.000704636	8.9922e-05	0.00129854	0.000582847	0.00458205		0.00534003		0.00305381		0.0741132		0.00130542	0.000539345	0.000721489
155.107	C9H15O2	unknown	0.25544	0.134048	0.192898	0.06768	0.209888	0.157789	0.248076	0.13763	0.264155	0.143899	0.263171	0.0324059	0.500357		0.082306	0.00433977	0.0868527	0.0142016	0.0671985	0.00894763	0.0714839	0.00620578	0.0318921	0.00812357	0.0245274	0.00829283	0.0391722	0.00688938	0.271795		0.415739		0.0658812		0.550204		0.137832	0.0652443	0.0420045
155.143	C10H18OH	Cineole, other oxygenated monoterpenes	0.0195386	0.0136926	0.0161517	0.00842839	0.0143124	0.00691783	0.0196498	0.0140684	0.0156799	0.0101875	0.0167651	0.00729574	0.0545262		0.0110352	0.000880648	0.0127358	0.0100051	0.00499043	0.00129012	0.00582276	0.000111139	0.00493556	0.00125574	0.0045232	0.00265267	0.00585988	0.0012641	0.0349008		0.0460131		0.0137025		0.0517371		0.015865	0.00774246	0.00569621
155.179	C11H22H	unknown	0.00651915	0.00434782	0.00635205	0.00198459	0.00655911	0.00724992	0.00811843	0.00504707	0.00470653	0.00197295	0.00199047	0.000529519	0.00271209		0.00807081	0.000101611	0.0131305	0.00441038	0.0137392	0.00344938	0.0160962	0.000343699	0.0113817	0.00199745	0.00797973	0.00114295	0.00838447	0.00142758	0.0230606		0.00727118		0.00278945		0.0198764		0.0176102	0.00724193	0.00099015
156.066	C7H9NO3H	unknown	0.00213718	0.00123544	0.00342576	0.00179638	0.00180915	0.00107032	0.0132363	0.0221347	0.00964664	0.00815754	0.00245669	9.33558e-05	0.00768117		0.0015066	0.000212193	0.00112046	5.84411e-05	0.000527274	0.000157995	0.000551885	4.90285e-05	0.000408072	0.000114353	0.000302379	9.26988e-05	0.00165471	0.00139878	0.00728977		0.0123514		0.00529377		0.0764797		0.000307071	6.84942e-06	0.000344612
157.05	C7H8O4H	unknown	0.000605592	0.000400284	0.000770681	0.000343616	0.000675659	0.000483023	0.00308198	0.0043791	0.00111175	0.000831104	0.00071656	0.000132784	0.00159826		0.000878119	9.41075e-06	0.000477095	9.62613e-05	0.000390122	6.42105e-05	0.000406831	3.23956e-05	0.000322854	6.65484e-05	0.000230298	4.98458e-05	0.000625179	0.000305202	0.00233713		0.00231611		0.00161766		0.0137907		0.000534662	0.000216064	0.000185806
157.065	C11H8OH	unknown	0.0188022	0.00765576	0.0177739	0.00540385	0.0186783	0.00835624	0.0146611	0.00651301	0.0109671	0.00532527	0.0123637	0.00221845	0.0378768		0.0115497	0.000522097	0.00901245	0.00495425	0.00413868	0.000750716	0.00612059	0.00252012	0.00363374	0.00243776	0.0041183	0.00183237	0.00963648	0.00485349	0.033067		0.0127226		0.00251379		0.00892743		0.00886936	0.00849748	0.00482255
157.086	C8H12O3H	unknown	0.0296093	0.0182392	0.0369308	0.0185576	0.0293829	0.0292834	0.0386025	0.0359101	0.0191398	0.00540757	0.00948807	0.00222011	0.0103404		0.0300456	0.0106668	0.0245461	0.0137505	0.0187719	0.00953403	0.0238544	0.00804544	0.00916501	0.00156736	0.0106274	0.00314634	0.0111094	0.00593128	0.0142375		0.00361349		0.0107815		0.0123016		0.00198738	0.000643861	0.00571034
157.101	C12H12H	C2 naphthalenes	0.0179919	0.00681753	0.0193424	0.00671996	0.0142001	0.00696257	0.026978	0.0192916	0.0164115	0.0100418	0.0178831	0.00231379	0.0304746		0.0145736	0.00116434	0.00923632	0.00684209	0.000507702	0.000224704	0.00061963	0.000247401	0.000340128	0.000547042	0.000124952	0.000116108	0.00261737	0.00206539	0.0117118		0.0375259		0.00795386		0.0382236		0.00159774	0.00104828	0.0020095
157.122	C9H16O2H	unknown	0.0065234	0.00239978	0.0082003	0.00319252	0.00565385	0.00324719	0.013485	0.00807163	0.00772264	0.00357687	0.00638441	0.000755155	0.0110458		0.00670325	0.00075317	0.00965999	0.00164287	0.0109346	0.00173189	0.0111648	0.00169947	0.00647748	0.00130028	0.00468633	0.00203923	0.00658588	3.47167e-05	0.0366742		0.0285321		0.0197445		0.0373359		0.0226314	0.0132167	0.00221078
157.159	C10H20OH	Decanal (likely major contributor), menthol	0.00266982	0.00129279	0.00306811	0.00101996	0.00248783	0.00150758	0.00561877	0.00533851	0.00453004	0.00290174	0.00161059	3.2574e-05	0.00396896		0.00205258	0.000131651	0.00221831	0.00116009	0.00104029	0.000575259	0.0013907	0.000159645	0.00102061	6.58066e-05	0.000780292	0.00014645	0.00166253	0.000924853	0.00476221		0.00727496		0.00263787		0.0303475		0.000326446	5.65771e-05	0.000430695
157.195	C11H24H	unknown	0.0261744	0.00759283	0.0261707	0.00893961	0.0258551	0.0138838	0.0255155	0.0126651	0.0173729	0.0104002	0.0194836	0.00300893	0.0365141		0.0121264	0.000955344	0.0145388	0.00580824	0.0113916	0.00404273	0.0172529	0.00261585	0.00713402	0.00224911	0.00640793	0.00157937	0.0135456	0.0052022	0.0933161		0.059537		0.00631466		0.0620868		0.0317309	0.0162559	0.00692817
158.096	C11H11NH	unknown	0.0192953	0.0104369	0.0232743	0.0120689	0.0187865	0.016025	0.0214141	0.0176656	0.00987639	0.00168926	0.00634565	0.00226619	0.0094093		0.0210578	0.00286531	0.0183536	0.00844066	0.0151963	0.00517417	0.0165927	0.00112744	0.0114302	0.00145069	0.0106512	0.00213136	0.00823164	0.00257687	0.020089		0.0128792		0.00266576		0.0121432		0.00547774	0.00111468	0.00508237
158.975	C5H2O4SH	unknown	0.0315037	0.0183772	0.0263275	0.0101256	0.026522	0.0184327	0.0300147	0.0177559	0.0336717	0.0220769	0.0269738	0.00241006	0.062936		0.0106952	0.000977236	0.0112835	0.00102989	0.00877523	0.00103457	0.00844489	0.00138234	0.00570485	0.000962736	0.00428002	0.00117668	0.00675033	0.00147049	0.0449263		0.0781698		0.0101925		0.0563423		0.0200611	0.011007	0.0068508
159.029	C6H6O5H	unknown	0.0103104	0.00462942	0.0193476	0.00907326	0.0102224	0.00686803	0.0188845	0.0117608	0.0121433	0.00577868	0.0141498	0.00187041	0.0213573		0.0108081	0.0016033	0.00490162	0.00211839	0.00583502	0.00291312	0.00607172	0.000275956	0.00296404	0.000578454	0.00226142	0.000472093	0.00472438	0.00305835	0.0201813		0.0116055		0.0102715		0.0257141		0.0110429	0.00787004	0.00159074
159.044	C10H6O2H	unknown	0.00343471	0.0019078	0.0043665	0.0022336	0.00333139	0.00218657	0.00682647	0.00390626	0.00203765	0.00059549	0.00454962	0.000811809	0.00828193		0.0048886	0.000624003	0.00339725	0.00175102	0.00170861	0.000493256	0.00191578	0.000321843	0.000882535	0.000273719	0.000653197	0.000181484	0.00160794	0.000508828	0.00781207		0.0057839		0.00706624		0.0113682		0.00200047	0.00105256	0.000801582
159.065	C7H10O4H	unknown	0.001948	0.00135549	0.00210893	0.000831299	0.00171117	0.00128874	0.00501969	0.00522776	0.00302904	0.00204233	0.00147142	0.000118848	0.00248657		0.00158108	9.55128e-05	0.00167974	0.000960336	0.000800922	0.000245227	0.00101174	0.000152022	0.000561993	0.00011895	0.000306281	1.34538e-05	0.000988211	0.000508938	0.00430614		0.00349564		0.00235223		0.0260771		0.000341261	5.50307e-05	0.000194245
159.08	C11H10OH	unknown	0.000439044	0.000226977	0.000620098	0.000216521	0.000321541	0.000202885	0.00059087	0.000302123	0.00052498	0.000276282	0.000325349	3.95695e-05	0.000397424		0.000340878	2.27002e-05	0.000394712	0.000102677	0.000182249	5.33084e-07	0.000205446	7.42267e-05	0.000136381	7.35836e-05	0.000129545	5.36938e-05	0.000228919	9.33411e-05	0.000822996		0.00040125		0.000237243		0.000635707		0.000304762	0.000233533	0.000113444
159.117	C12H14H	unknown	0.00584761	0.00403551	0.006953	0.00368464	0.00477058	0.00176101	0.00447915	0.00222925	0.00387556	0.00226067	0.0028369	0.000429239	0.0142157		0.0037313	0.000313962	0.0026165	0.00156697	0.00190148	0.000477892	0.00216467	0.000683844	0.0012201	0.000405057	0.00136905	0.00079944	0.00310507	0.00182485	0.0111401		0.00955018		0.00119156		0.00508628		0.00301346	0.00273005	0.00293394
159.138	C9H18O2H	unknown	0.0102117	0.00368733	0.0111921	0.00359842	0.00884775	0.00563012	0.0099336	0.00522827	0.0068375	0.00222615	0.00443305	0.00140422	0.0062322		0.0101347	0.00128194	0.00881624	0.00282521	0.00861773	0.00206235	0.00878067	0.000191229	0.00839029	0.000929388	0.00787975	0.00104121	0.00549382	0.00143492	0.00953388		0.010529		0.00149586		0.00823453		0.00439929	0.00177202	0.00329907
159.174	C10H22OH	unknown	0.020768	0.00708705	0.0192514	0.00617134	0.0157158	0.00795766	0.0227515	0.0123934	0.0201476	0.0118129	0.0178609	0.00109029	0.0288336		0.00879023	0.00045204	0.00980838	0.00237689	0.0108295	0.00222122	0.0118545	0.00131364	0.00638329	0.00152265	0.00485099	0.000707183	0.00817702	0.00121413	0.0510363		0.0602566		0.00954356		0.0441988		0.0290894	0.0179731	0.00515571
160.076	C10H9ONH	unknown	0.0441556	0.0224707	0.0416552	0.0199369	0.0327114	0.0235053	0.0516099	0.0401874	0.0376418	0.0178605	0.0254667	0.00577201	0.0298625		0.0256934	0.00366814	0.0268843	0.0130623	0.0209268	0.00523768	0.0247547	0.00484045	0.00995179	0.00212216	0.00676985	0.00110319	0.0152286	0.0039604	0.0535326		0.045688		0.0184888		0.0836474		0.016217	0.00498833	0.0051096
160.112	C11H13NH	unknown	0.0294793	0.0209938	0.0317061	0.0130656	0.0203355	0.0123105	0.0561933	0.0427864	0.021143	0.00931013	0.0422705	0.00910186	0.0373188		0.0313863	0.0059774	0.0175933	0.0135811	0.0114571	0.00416999	0.0138851	0.00359819	0.00438897	0.00139914	0.00304654	0.000601407	0.00635343	0.00279625	0.0358009		0.0183303		0.0534988		0.0783178		0.00493709	0.000391735	0.00150586
161.06	C10H8O2H	unknown	0.00667764	0.00268855	0.0106788	0.00592767	0.00490871	0.00221706	0.0134111	0.0115745	0.0131958	0.00746279	0.0112707	0.00254146	0.0225351		0.00380428	5.66488e-05	0.00295337	0.00044131	0.003461	0.00129742	0.0031102	0.000166685	0.00213817	0.000390968	0.00174658	0.000295695	0.00272649	0.00134809	0.0148037		0.0099224		0.0100055		0.0297557		0.00697528	0.00387113	0.00117021
161.096	C11H12OH	unknown	0.00153874	0.000879619	0.00185639	0.000993154	0.00163302	0.00121355	0.00238755	0.00157152	0.000948882	0.000713796	0.000992129	0.000978569	0.00253057		0.00150138	8.06471e-05	0.0019309	0.000722481	0.000603333	2.15947e-05	0.000712541	6.90295e-05	0.000526186	0.000270554	0.000373587	0.000184271	0.00121262	0.000258457	0.00540843		0.00580876		0.00131685		0.00573094		0.0021723	0.00124246	0.000513213
162.055	C9H7NO2H	unknown	0.00172508	0.00111157	0.00178756	0.00085003	0.00160303	0.00121307	0.00321379	0.00286448	0.00253064	0.00156893	0.00119202	5.99764e-05	0.00197586		0.00109502	0.000108534	0.00120189	0.000644119	0.000642406	0.000223156	0.000926064	5.80034e-05	0.000475216	0.000103614	0.000284301	3.75265e-05	0.000816959	0.00041254	0.00265407		0.0029627		0.00149314		0.0177476		0.000354649	8.48176e-05	0.000129382
162.091	C10H11NOH	unknown	0.00132709	0.000879672	0.00151597	0.000445331	0.00108764	0.000759944	0.00468914	0.00619493	0.00310333	0.0021739	0.00151416	0.00011983	0.0022054		0.00105532	6.91336e-05	0.00112795	0.000577549	0.000550299	8.27746e-05	0.000732316	0.000111216	0.000387213	7.96397e-05	0.000226049	2.18921e-05	0.000681302	0.000300353	0.00311828		0.00221544		0.00209262		0.0274743		0.000260597	0.000101728	8.97601e-05
162.185	C9H23NOH	unknown	0.0429223	0.0179686	0.039289	0.0147173	0.0334424	0.0196287	0.0417696	0.0238869	0.0348767	0.0169196	0.0269381	0.00719954	0.0341969		0.0231519	0.00137953	0.0206726	0.00955667	0.0211402	0.00498107	0.02502	0.000112274	0.0125538	0.00224309	0.00900197	0.00150235	0.0239768	0.0117889	0.0552908		0.0593408		0.0195761		0.0580591		0.0260111	0.00974616	0.00636953
163.039	C9H6O3H	unknown	0.0504129	0.0235711	0.0465981	0.0166366	0.0348733	0.0168445	0.0758259	0.0514257	0.0544489	0.0259024	0.05171	0.00962077	0.0632126		0.0255594	0.00448544	0.0279858	0.0112615	0.0245348	0.00252113	0.0261397	0.00424496	0.0108447	0.00260325	0.00719124	0.00138609	0.0188663	0.00266383	0.0869897		0.0846448		0.0426908		0.139019		0.0259076	0.00779592	0.00580094
163.075	C10H10O2H	unknown	0.00365227	0.00156173	0.00365999	0.000921776	0.00298358	0.00154978	0.00590048	0.00625318	0.0070844	0.00467345	0.00285224	0.000204395	0.0062427		0.00174032	0.000153544	0.00183544	0.00100958	0.00118108	0.000336255	0.0015719	3.39813e-05	0.000904547	0.000271149	0.000558384	8.11676e-05	0.00162994	0.000716648	0.005056		0.00741112		0.0077687		0.029279		0.00110337	0.000523905	0.000335558
163.112	C11H14OH	unknown	0.00216685	0.00141532	0.00234183	0.000976881	0.00182371	0.00126057	0.00671748	0.00819372	0.00445798	0.00302777	0.00245668	1.5235e-05	0.00346669		0.00123662	0.000109975	0.00160468	0.000687955	0.000823299	0.000307262	0.00119129	0.000122793	0.000596191	0.000133476	0.000324953	8.59429e-06	0.00111952	0.000516857	0.00465636		0.00442769		0.00220126		0.0380822		0.000419761	7.80669e-05	0.00016619
163.148	C12H18H	C12 aromatics	0.000414381	0.000191353	0.000504628	0.000214136	0.000404395	0.000228475	0.00111288	0.00118713	0.000457202	0.000223638	0.000546909	0.000234634	0.00112738		0.000391792	4.22009e-05	0.000413989	0.000152343	0.000172505	2.2066e-05	0.000207078	8.30271e-06	0.000129857	5.03587e-05	9.11891e-05	3.38886e-05	0.000326986	0.000122804	0.00129214		0.00129594		0.000752899		0.00457277		0.000301306	0.000122577	8.48019e-05
163.169	C9H22O2H	unknown	0.0257485	0.0110704	0.0225015	0.00721821	0.0195098	0.0110283	0.0178383	0.0111247	0.020699	0.011691	0.0185578	0.00589031	0.0254113		0.0107759	4.73435e-05	0.00973399	0.00425368	0.0127473	0.00413244	0.0160439	0.0014343	0.00697273	0.00149207	0.00526691	0.000969532	0.00937377	0.00373455	0.0290249		0.04509		0.0209529		0.0323373		0.0136512	0.00701532	0.00363409
164.071	C9H9O2NH	unknown	0.116192	0.0569753	0.0940932	0.0371698	0.0860871	0.0437533	0.115801	0.0742947	0.117072	0.0592961	0.0967599	0.0184996	0.143018		0.0411222	0.00393311	0.0390127	0.00884366	0.0397699	0.00825616	0.0476475	0.000798731	0.0210568	0.00420265	0.014497	0.000493634	0.0360151	0.016956	0.127098		0.142189		0.0439809		0.205814		0.0620157	0.0230666	0.014778
164.092	C6H13NO4H	unknown	0.011823	0.00541269	0.0135354	0.00480408	0.00839707	0.00528276	0.0258378	0.0196055	0.0135101	0.00806113	0.0171797	0.00178578	0.0186549		0.00968278	0.00127053	0.01001	0.00662841	0.00603505	0.000546684	0.00599099	0.00123713	0.00262569	0.00077628	0.00160531	0.000316921	0.00332123	0.000154716	0.0292679		0.029057		0.0132379		0.0473384		0.00851887	0.00270292	0.000883164
165.055	C9H8O3H	unknown	0.00542699	0.00247809	0.00554805	0.00256045	0.00474801	0.00161952	0.00826932	0.00526064	0.00483541	0.00232176	0.00589886	0.00218525	0.0136862		0.00337604	4.52668e-05	0.00362862	0.000844823	0.00180626	0.000157494	0.0021238	7.14257e-05	0.0012965	0.000484126	0.000909931	0.000288315	0.00300543	0.00136506	0.0124963		0.0129685		0.00503433		0.0184619		0.00525903	0.0019606	0.00108989
165.091	C10H12O2H	Eugenol, isoeugenol	0.00447715	0.00175375	0.00385854	0.00127086	0.00340232	0.00141521	0.0055367	0.00384023	0.00587724	0.00310515	0.00317707	0.000254533	0.00746188		0.00201425	0.000149566	0.0017732	0.000609624	0.00114602	0.000350739	0.00164859	2.88447e-05	0.000950782	0.000348498	0.000575379	5.81196e-05	0.00127335	0.000538837	0.00653577		0.00574402		0.00203581		0.0222452		0.00195772	0.00117472	0.000581274
165.164	C12H20H	unknown	0.00461857	0.00160296	0.00391796	0.00136047	0.00309234	0.00139908	0.00573335	0.00349632	0.00610108	0.00310901	0.0036096	0.000549163	0.00710854		0.00197724	1.24715e-05	0.00188305	0.000195719	0.0011344	0.000190509	0.00138992	0.000187739	0.000896653	0.000290199	0.000564589	6.9056e-05	0.000989633	0.000308216	0.00558889		0.00428253		0.00165845		0.0131921		0.00187811	0.00127299	0.000560366
166.123	C10H15NOH	unknown	0.0376817	0.016005	0.0314573	0.0147222	0.0342812	0.02171	0.0313193	0.0251447	0.0323949	0.013355	0.0269632	0.00855569	0.0357141		0.0116933	0.00110387	0.0134601	0.00511279	0.0216845	0.00728231	0.0295686	0.000994516	0.0127707	0.00368614	0.0087409	0.00124837	0.0180458	0.00746948	0.068099		0.0973945		0.00785654		0.061598		0.0283971	0.0127514	0.00485982
166.172	C12H21H	unknown	0.0130989	0.00660989	0.0157144	0.00539684	0.0103739	0.00725725	0.0205365	0.012882	0.0139749	0.0113029	0.0159841	0.00313606	0.0281657		0.0107229	0.00149299	0.00671029	0.00157534	0.00357299	0.00124859	0.00385699	0.000226165	0.00256324	0.000875655	0.00167148	0.000629271	0.00346081	0.0012652	0.0253778		0.0189746		0.0147628		0.0436329		0.00978127	0.00476138	0.00177769
167.019	C4H7O7	unknown	0.000603245	0.000491772	0.000877078	0.000331478	0.000725359	0.000587185	0.00305609	0.00397428	0.00167932	0.00109992	0.000972624	0.000171347	0.00135324		0.000532539	9.12172e-05	0.000598446	0.00034628	0.000359042	7.53466e-05	0.000412005	5.19775e-05	0.000234076	5.81937e-05	0.000135359	4.60596e-06	0.000433609	0.000233665	0.00190717		0.0020439		0.00134938		0.0176744		0.000186311	7.12899e-06	7.68953e-05
167.07	C9H10O3H	unknown	0.00170329	0.000607697	0.00174669	0.00067685	0.00116278	0.000438718	0.0046338	0.00565841	0.00318896	0.00208803	0.00163845	1.68256e-05	0.00351332		0.00106269	3.71443e-05	0.00122773	0.000226561	0.000578323	0.000127151	0.000660971	4.28989e-05	0.000432896	8.87059e-05	0.000300624	5.10319e-05	0.000708253	0.000383208	0.00364116		0.00298043		0.00293078		0.0140427		0.000940894	0.000320508	0.000259826
167.107	C10H14O2H	unknown	0.00406647	0.00365257	0.00344628	0.00145863	0.00244024	0.00188376	0.00285904	0.00127161	0.00413994	0.00255897	0.00201162	0.000288649	0.00323909		0.00155845	6.68922e-05	0.00178822	0.000494253	0.000973353	0.000142526	0.00126189	0.000408949	0.000651189	0.000337565	0.000670216	0.000265992	0.00109234	0.000364587	0.00492421		0.00464172		0.00117441		0.00372161		0.00228465	0.00183518	0.00076116
167.143	C11H18OH	unknown	0.157522	0.138415	0.0963324	0.030805	0.133709	0.143265	0.0940826	0.04631	0.156394	0.0828364	0.10145	0.0243799	0.244324		0.0388154	0.0012121	0.0348042	0.00632016	0.0353387	0.00768703	0.0434634	0.00557585	0.0228547	0.00625757	0.0163006	0.00185716	0.0277943	0.00571463	0.144042		0.171868		0.0530096		0.176449		0.0861858	0.0391117	0.0227431
167.179	C12H22H	unknown	0.0662182	0.0213397	0.0535485	0.017757	0.0568471	0.0276357	0.0848887	0.0491251	0.0709736	0.0423742	0.0633755	0.00806656	0.103602		0.0278062	0.00237915	0.0485185	0.0197633	0.0186371	0.00268397	0.0188727	0.00109862	0.0092372	0.00232445	0.00680907	0.00229074	0.0109673	0.00190311	0.0702544		0.08773		0.0166136		0.141781		0.0334546	0.0143797	0.0105737
168.102	C9H13NO2H	unknown	0.00930821	0.00402143	0.0138229	0.0052259	0.00676552	0.00403109	0.0176687	0.0142638	0.012489	0.00808627	0.0135211	0.000991145	0.0191767		0.00718497	0.000662894	0.00376939	0.00212725	0.00370861	0.00139173	0.00377528	0.000187318	0.00217666	0.000732056	0.00138976	0.000154717	0.00330147	0.00195705	0.0213107		0.01668		0.0147284		0.0420188		0.00493666	0.0020379	0.000960169
169.05	C8H8O4H	unknown	0.00858327	0.00591499	0.00718683	0.00285279	0.00794592	0.00421344	0.00900735	0.00399493	0.00761908	0.0040901	0.00667808	0.00170181	0.0206982		0.00458763	0.000494888	0.00423336	0.00113441	0.00227416	0.000703276	0.00285352	2.43766e-05	0.0017624	0.000408225	0.00143182	0.000567513	0.00261977	0.000613703	0.0137453		0.0145512		0.0084844		0.0157567		0.00693411	0.00327455	0.00191778
169.065	C12H9O	unknown	0.00255424	0.00155498	0.0034605	0.0015541	0.00184371	0.00120637	0.0113528	0.0166436	0.00695429	0.00547532	0.00290972	5.48976e-05	0.00839443		0.00212987	0.000161139	0.00204257	0.000777612	0.000896591	0.000315678	0.000973381	8.34498e-05	0.000659219	0.000120809	0.000454998	7.04192e-05	0.00199455	0.00165541	0.00881077		0.0122866		0.00436785		0.0459881		0.000605572	0.000151637	0.000250071
169.086	C9H12O3H	unknown	0.0570296	0.0683673	0.0294373	0.0114827	0.0484775	0.0453528	0.0257113	0.0126299	0.0316953	0.0183462	0.0291078	0.00763791	0.0892685		0.0111015	0.000378967	0.0113893	0.00334947	0.0118844	0.00251195	0.0161314	0.00449387	0.00940109	0.00483762	0.00731782	0.00205895	0.0114631	0.0013387	0.0647546		0.0436295		0.0237238		0.0382457		0.023695	0.0167129	0.00776956
169.105	C10H16SH	unknown	0.0261021	0.0100519	0.0251597	0.0086562	0.0244195	0.0156379	0.0255681	0.013983	0.0147503	0.00394629	0.00890579	0.00167811	0.0154769		0.0230312	0.00541722	0.0202516	0.00720262	0.0156584	0.00499762	0.0165727	0.00409381	0.0164499	0.00255481	0.0157544	0.00274219	0.0158768	0.00584415	0.0263943		0.0191131		0.00815855		0.0173043		0.0150828	0.00542862	0.00928755
169.122	C10H16O2H	unknown	0.0309058	0.00752364	0.0296691	0.0120812	0.0220938	0.00852907	0.0489122	0.0399731	0.0333712	0.0173438	0.0274743	0.00329726	0.0322757		0.015334	0.000446824	0.0417324	0.00133001	0.0976092	0.0193032	0.118413	0.0153502	0.0547299	0.0126826	0.0356376	0.00693813	0.0300092	0.00798954	0.191118		0.112365		0.0184079		0.196898		0.207186	0.078962	0.00861933
169.159	C11H20OH	unknown	0.0236804	0.0140148	0.0264553	0.0136493	0.0239122	0.0202273	0.0341628	0.0288063	0.0157447	0.00385248	0.0127128	0.00298158	0.0155224		0.018058	0.00307902	0.0160595	0.0105616	0.0102075	0.00563859	0.0128688	0.0044354	0.00392576	0.000514149	0.00341699	0.00144251	0.00508645	0.00255466	0.0216895		0.0130065		0.0139058		0.032722		0.00213606	0.000237025	0.00312582
169.195	C12H24H	unknown	0.0160457	0.00624066	0.0198083	0.00837314	0.0166324	0.00938602	0.0348708	0.0257248	0.0144717	0.00555674	0.0191189	0.00338815	0.0283628		0.0161397	0.00174397	0.0191086	0.0125103	0.000805887	9.74582e-05	0.000850822	5.50734e-05	0.000710953	0.000604684	0.000559097	5.57508e-05	0.0019374	0.00148292	0.0123315		0.0134101		0.00614094		0.0202097		0.000361898	6.50887e-05	0.00129654
170.081	C8H11NO3H	unknown	0.0077279	0.00245939	0.0110761	0.00404398	0.0062649	0.00291285	0.011828	0.00872489	0.00900445	0.00485712	0.008366	0.000879636	0.0162789		0.00598166	0.000884072	0.00458408	0.00151303	0.00296656	0.00135196	0.00256593	0.000197948	0.00248921	0.00119624	0.00204623	0.000990139	0.00436114	0.00183906	0.0227046		0.0124965		0.0119931		0.0250365		0.00749941	0.0040647	0.00136489
170.154	C10H19NOH	unknown	0.00425297	0.00211286	0.0056048	0.00212717	0.0040591	0.00269842	0.0107678	0.00659841	0.00558176	0.00263128	0.00456291	0.000620904	0.00730352		0.0045647	0.000422451	0.00644027	0.00142694	0.0053568	0.00116448	0.00645884	0.0006488	0.00365221	0.000723697	0.00243245	0.000824542	0.00342793	0.000164595	0.0180711		0.0117559		0.0150032		0.0268183		0.0144726	0.00560325	0.00104305
171.029	C7H6O5H	unknown	0.00147785	0.000798876	0.00168912	0.000568801	0.00131518	0.000943192	0.00343836	0.00346885	0.00300176	0.00196292	0.00102253	3.71743e-05	0.00226976		0.00103812	8.96503e-05	0.00105063	0.00035915	0.000687217	0.000269133	0.000902388	6.28641e-05	0.000493668	6.73026e-05	0.000395627	0.000116727	0.000875489	0.000355566	0.00292704		0.00379958		0.00141005		0.0326112		0.000231292	2.0165e-05	0.000187359
171.065	C8H10O4H	unknown	0.000506919	0.000185966	0.000623436	0.000202001	0.000462821	0.000266186	0.00128157	0.00131469	0.00105579	0.000634888	0.000485199	1.74126e-06	0.000842302		0.000349263	3.76132e-05	0.00109112	0.000845105	0.000198317	2.75836e-05	0.000198945	2.60323e-06	0.000156702	3.76003e-05	0.00010844	2.28975e-05	0.000298507	0.000176443	0.00086779		0.00107897		0.000612912		0.00714871		0.000103323	1.14095e-05	6.15594e-05
171.08	C12H11O	unknown	0.00397949	0.00192336	0.00465576	0.00143663	0.00363498	0.00202232	0.00410749	0.00226017	0.0026557	0.00108553	0.00228964	0.000497003	0.00663624		0.00273995	8.97554e-05	0.00221428	0.0012878	0.00174859	0.000491136	0.00221297	0.000318091	0.00125926	0.000516708	0.00138512	0.00064795	0.002073	0.000845347	0.00716235		0.00556477		0.00112817		0.00368027		0.00212636	0.00198346	0.00165607
171.117	C13H14H	unknown	0.0154719	0.00562215	0.014882	0.00450196	0.0119268	0.00560938	0.0146883	0.00672767	0.0132934	0.00734365	0.0107379	0.00147587	0.0225332		0.0080203	0.000280242	0.00820488	0.00401735	0.00578522	0.00165964	0.00701269	0.000544946	0.0048718	0.00167134	0.00426323	0.00109944	0.00677726	0.00164574	0.0363549		0.0325998		0.00547638		0.0282756		0.0145007	0.00996395	0.00383321
171.138	C10H18O2H	unknown	0.0170802	0.00905036	0.0178995	0.00961198	0.0138132	0.0110634	0.0175328	0.017038	0.0107712	0.00478614	0.00772341	0.0023452	0.0093747		0.0102989	0.00180256	0.00950541	0.0053567	0.00770812	0.00253066	0.00943315	0.00117416	0.00357555	0.000732798	0.00278657	0.000871887	0.00453325	0.00171025	0.014925		0.00947168		0.00367556		0.0188326		0.00379749	0.00074051	0.00236557
171.174	C11H22OH	unknown	0.0357894	0.0197849	0.036174	0.0123417	0.0257417	0.00869001	0.0466354	0.032656	0.0253106	0.0107141	0.0620995	0.0208717	0.075834		0.0241809	0.00403424	0.0180441	0.0126816	0.0145659	0.00506858	0.0177916	0.00420942	0.00516011	0.00162252	0.00356882	0.000561467	0.00601563	0.00166884	0.0349429		0.0166587		0.0601562		0.0775512		0.00550164	0.00111645	0.00209057
171.211	C12H26H	unknown	0.00803833	0.00407153	0.0148111	0.00855107	0.00842159	0.00647641	0.0153642	0.0137988	0.00865793	0.00342338	0.0102466	0.0032466	0.0111067		0.00825235	0.00160892	0.00831139	0.00496037	0.00361504	0.00175545	0.00398383	0.000575355	0.00192075	0.00040258	0.00134574	0.000350402	0.00227554	0.00146493	0.00936132		0.00454246		0.00603128		0.0172251		0.00217701	0.00103247	0.000528985
172.06	C7H9NO4H	unknown	0.00386993	0.00201776	0.00648561	0.0023978	0.00233775	0.00170084	0.00933579	0.00883363	0.00593655	0.00379334	0.00236236	0.000926641	0.00683924		0.00570711	0.00152179	0.0018694	0.000753371	0.00113915	0.000357473	0.000788043	0.000378767	0.00102494	0.000273313	0.000781039	0.000134641	0.00216333	0.00110445	0.00986175		0.0074663		0.00835524		0.0137986		0.00210198	0.00131083	0.000506703
172.097	C8H13NO3H	unknown	0.00275208	0.00134539	0.00346165	0.00156207	0.00253287	0.00123008	0.00454389	0.00271693	0.00177283	0.000672708	0.00471497	0.000484972	0.0087516		0.00286878	0.00025418	0.00244568	0.00133488	0.00106531	0.000273879	0.00122706	0.000168807	0.000551958	0.000197411	0.000416881	0.00010312	0.000993972	0.000299656	0.00489212		0.0031609		0.00577624		0.00927663		0.00108555	0.000373325	0.000383639
173.044	C7H8O5H	unknown	0.00205628	0.000925383	0.00224483	0.000545331	0.00190385	0.00124834	0.00275581	0.00174564	0.002634	0.00152372	0.00118808	0.000128141	0.00284561		0.00160193	0.000117136	0.00154903	0.000715256	0.000864694	0.000248682	0.00114817	9.45555e-05	0.000863355	0.000146513	0.000718164	9.72906e-05	0.00115726	0.000541476	0.00310799		0.00302527		0.00222384		0.00996637		0.000501636	0.000269022	0.000288432
173.06	C11H8O2H	unknown	0.00272527	0.0016131	0.00288544	0.00109564	0.00226217	0.00158787	0.00549283	0.00486295	0.00390225	0.00248643	0.00189013	5.94687e-05	0.00347021		0.00196482	7.44776e-05	0.0021839	0.000994034	0.00146658	0.000298123	0.00191499	0.000147085	0.001042	0.00026147	0.000626431	8.87788e-05	0.00157837	0.000705486	0.00543596		0.00454951		0.00277813		0.0264388		0.000664271	0.000234407	0.000259162
173.081	C8H12O4H	unknown	0.0252863	0.0153397	0.0210269	0.00843748	0.0146846	0.00857161	0.0150111	0.00750582	0.0162909	0.0074151	0.0179815	0.00365871	0.0474665		0.00749293	0.000364869	0.005863	0.00235263	0.00248805	0.000577134	0.00409384	0.00147296	0.00253165	0.00125035	0.0022441	0.00112656	0.00454392	0.001841	0.0434874		0.0115862		0.00248071		0.0405671		0.0162298	0.011618	0.00420309
173.096	C12H12OH	unknown	0.0156674	0.00652606	0.0153925	0.00567013	0.0124231	0.00802787	0.0135825	0.00950202	0.0121861	0.00540453	0.00833298	0.00322335	0.00978061		0.00826985	0.000793646	0.00751677	0.00268809	0.00733824	0.00233181	0.00890437	0.00106009	0.00462979	2.73028e-05	0.00386109	0.000886699	0.00595925	0.00203521	0.015233		0.0171443		0.00311725		0.0146519		0.00684654	0.00184182	0.00323785
173.132	C13H16H	unknown	0.0077648	0.00446774	0.00796077	0.00343688	0.00609693	0.00241021	0.0138619	0.00955985	0.0091864	0.00424619	0.0068719	0.00020691	0.0111063		0.00456947	0.000105622	0.0181001	0.000304571	0.041227	0.00703196	0.0401782	0.0120026	0.0214367	0.00538831	0.0160589	0.00598955	0.0138179	0.0019995	0.0807295		0.0604015		0.0105185		0.0510693		0.0594552	0.0323985	0.0037661
173.154	C10H20O2H	unknown	0.0238504	0.0131185	0.0221627	0.011747	0.01573	0.0102398	0.0295245	0.0234502	0.023317	0.0133445	0.0173897	0.00497058	0.0160681		0.0106086	0.00163655	0.0125914	0.00493848	0.0118604	0.00220898	0.013325	0.00250122	0.0047907	0.000786468	0.00380096	0.000609752	0.00669676	0.00170708	0.0257064		0.0271407		0.012844		0.0457786		0.00883929	0.0020111	0.00255273
174.091	C11H11NOH	unknown	0.0188949	0.0140461	0.0190739	0.00836702	0.0121472	0.00502257	0.0284613	0.0230127	0.0136504	0.00619879	0.030255	0.0103253	0.0289515		0.0132184	0.00290608	0.00667218	0.0057729	0.00528685	0.00301221	0.0065683	0.00193461	0.00163426	0.000533248	0.00123271	0.000516605	0.00206193	0.00186455	0.0131963		0.00448193		0.0333656		0.0497918		0.000550608	0.000187144	0.00041263
175.06	C7H10O5H	unknown	0.00561223	0.00167038	0.00796123	0.00350164	0.00486683	0.00245126	0.00980104	0.00600697	0.00941091	0.00558355	0.00795016	0.000547805	0.0150229		0.00344922	0.000219331	0.00375432	0.000968993	0.00264467	0.000397321	0.00276908	0.000489861	0.00216282	0.000702726	0.00165818	0.000742021	0.00282869	0.000652268	0.01958		0.0120382		0.0080817		0.0244541		0.00731115	0.00368121	0.000956502
175.075	C11H10O2H	unknown	0.00116405	0.000746125	0.00118244	0.000516909	0.000976721	0.000688752	0.00234874	0.00213849	0.00195837	0.00124956	0.00103033	6.93195e-05	0.00153453		0.000617042	1.72834e-05	0.000696019	0.000361957	0.000378375	0.000160624	0.000559082	9.4987e-05	0.00028499	6.30553e-05	0.000158796	8.982e-06	0.000457414	0.000194162	0.00189268		0.00192965		0.00135166		0.0141456		0.000231481	6.26704e-05	9.83031e-05
175.112	C12H14OH	unknown	0.0211823	0.00886868	0.0224126	0.00884604	0.0345044	0.0345794	0.0271843	0.0235308	0.0153956	0.00960237	0.0126203	0.00152175	0.0174097		0.0070945	0.000241467	0.0110539	0.00286849	0.0175982	0.00759154	0.0287525	0.000817914	0.00764642	0.00187805	0.00617414	0.000757915	0.0102505	0.00414992	0.102183		0.0629754		0.00620656		0.0722688		0.02448	0.0121305	0.00369438
175.169	C10H22O2H	unknown	0.0348071	0.0198148	0.0285351	0.012622	0.0262686	0.0146055	0.0301995	0.0224705	0.0325975	0.019146	0.0241308	0.00683451	0.0300648		0.0119212	0.00117396	0.0121924	0.00405599	0.0136676	0.00291263	0.0168678	0.00148442	0.00665133	0.001531	0.00479426	0.000650286	0.00973094	0.00279386	0.0374713		0.0457763		0.0131282		0.0557517		0.0165284	0.00575339	0.00345869
176.071	C10H9O2NH	unknown	0.0176039	0.0080812	0.0172312	0.00663404	0.0105178	0.00498318	0.0296352	0.0216075	0.020784	0.0125155	0.0221717	0.00528715	0.0210545		0.0083182	0.0015257	0.00980553	0.0047982	0.00741964	0.000328857	0.00685177	0.00185692	0.00311158	0.000884625	0.00204117	0.000506484	0.00523909	0.000243464	0.0249523		0.0271556		0.0184823		0.0546437		0.00699281	0.0024343	0.00292302
176.107	C11H13NOH	unknown	0.00309317	0.00134753	0.00386766	0.0017349	0.00336516	0.00154551	0.00554545	0.00360977	0.0030547	0.0018973	0.00316487	0.00142056	0.0073324		0.00208933	3.48017e-05	0.00234485	0.00088719	0.00133805	0.000100951	0.00172304	7.35333e-05	0.000912134	0.000354766	0.000687428	0.000220654	0.00188605	0.000695823	0.0124516		0.0102692		0.0042866		0.0140135		0.00337096	0.0014757	0.000559124
176.201	C10H25NOH	unknown	0.00204325	0.000889181	0.00209046	0.00063016	0.00164068	0.000819918	0.0035101	0.00349682	0.00445032	0.00307621	0.00186798	0.000128516	0.00384085		0.000840375	4.6677e-05	0.000988854	0.000492329	0.000685189	0.000235074	0.000966337	2.29346e-05	0.000588354	0.0001669	0.000328584	1.2105e-05	0.000735233	0.000247078	0.00328316		0.0038081		0.00516896		0.0220457		0.000483897	0.000173398	0.000185124
177.055	C10H8O3H	unknown	0.000867632	0.000537651	0.000967337	0.000407733	0.000747127	0.000469529	0.00252714	0.00284735	0.00161515	0.000947096	0.00118076	0.000151705	0.00140825		0.000508735	2.08759e-05	0.000620623	0.000245297	0.000373115	9.13286e-05	0.000475757	6.88256e-05	0.000234576	5.23348e-05	0.000135712	7.86863e-06	0.000372634	0.00019549	0.00188303		0.00175144		0.000779279		0.0167706		0.000270386	4.99535e-05	9.98073e-05
177.091	C11H13O2	unknown	0.000252669	9.06216e-05	0.000288447	0.000121937	0.00022895	9.10619e-05	0.000622644	0.000603639	0.000310134	0.000151608	0.0003279	9.38972e-05	0.00071563		0.000182134	1.44149e-06	0.00022881	5.46043e-05	0.000104235	1.62847e-05	0.00011251	5.91874e-06	8.24578e-05	2.36788e-05	5.38904e-05	1.58921e-05	0.000174036	5.6398e-05	0.000649446		0.000724465		0.000468252		0.00282368		0.000176548	6.02294e-05	6.36782e-05
177.127	C12H16OH	unknown	0.0252676	0.01546	0.0193293	0.00900903	0.018307	0.0126946	0.0167396	0.0141836	0.0203822	0.0154274	0.0157095	0.00400055	0.020065		0.00734176	0.000340989	0.00684122	0.00234273	0.00955551	0.00318005	0.0124109	0.000220916	0.00550274	0.00114827	0.00396192	0.000470006	0.00533195	0.00154165	0.0257949		0.0310964		0.0132322		0.0339037		0.0109512	0.00435658	0.00277265
177.164	C13H20H	C13 aromatics	0.0372454	0.0245599	0.0291434	0.0151237	0.0260464	0.015038	0.0354316	0.0237484	0.0399259	0.0293669	0.0359961	0.00453594	0.0425037		0.00963801	0.00137448	0.0106148	0.00269652	0.012908	0.00184306	0.0155241	0.00127912	0.00595531	0.0016564	0.00360854	0.000957275	0.00743601	0.00121139	0.0472359		0.0547406		0.0158907		0.0820989		0.0208125	0.00744882	0.00295071
177.185	C10H24O2H	unknown	0.00529695	0.00266817	0.00595073	0.00255322	0.00306365	0.00132923	0.0105933	0.00870935	0.00516376	0.00305532	0.00930241	0.00206119	0.00746074		0.00401501	0.000807856	0.0135933	0.0116036	0.00215577	0.000388399	0.0020765	0.000165496	0.00101175	0.000298246	0.000675213	1.03004e-05	0.00132061	0.000399363	0.00867114		0.00835519		0.00701728		0.0195732		0.0030395	0.00145852	0.000332896
179.07	C10H10O3H	unknown	0.00306113	0.0013344	0.00329576	0.00158316	0.00257412	0.000867866	0.00476957	0.00321018	0.00291878	0.00160825	0.00382002	0.00142097	0.00777389		0.00181641	9.16515e-05	0.00244775	0.00093738	0.00119034	4.89971e-05	0.00129547	6.60487e-05	0.000781289	0.000289287	0.00057286	0.00018287	0.00136416	0.000475187	0.00757636		0.00783909		0.00359989		0.0123439		0.00286058	0.00105663	0.000573024
179.107	C11H14O2H	unknown	0.0928766	0.0890609	0.0507905	0.0281195	0.0665475	0.0584936	0.0470174	0.0360176	0.0763836	0.0556609	0.0369248	0.00657375	0.0621744		0.0152263	0.000783961	0.017463	0.00053806	0.0172315	0.00403133	0.0227317	0.00150147	0.0121426	0.0021291	0.00805633	0.0010832	0.0109235	0.00224234	0.0652995		0.065435		0.0167251		0.106284		0.0334954	0.0108536	0.00886714
179.143	C12H18OH	unknown	0.0173004	0.00773513	0.0138042	0.00534257	0.0103211	0.00477371	0.0208096	0.0119284	0.0210775	0.0125273	0.020828	0.00329946	0.0251196		0.00602207	0.000154048	0.00663033	0.00179676	0.00670365	0.000304114	0.00712705	1.99508e-06	0.00260511	0.000649568	0.00171295	0.000448422	0.00333826	0.000203746	0.0282987		0.0327943		0.00643774		0.0491051		0.0147861	0.00570502	0.00183886
179.179	C13H22H	unknown	0.00372318	0.00139474	0.00487682	0.00192293	0.00438268	0.00344628	0.00925115	0.00804709	0.00364813	0.00222339	0.00629845	0.000924538	0.00609412		0.00421775	0.00028786	0.0070267	0.00670335	0.000953164	0.000285367	0.00090787	0.000124246	0.000387565	0.000219371	0.000205505	5.02744e-05	0.00131431	0.00079002	0.00550235		0.00508753		0.00572452		0.0156921		0.00119132	0.000411421	0.000247514
180.066	C9H10NO3	unknown	0.00604546	0.0025409	0.00610908	0.00207236	0.00470332	0.0018214	0.00770236	0.00447609	0.00569256	0.00265801	0.00610584	0.00105544	0.00702064		0.00431619	0.000898446	0.00184639	0.000190794	0.00218386	0.00089354	0.00243907	0.000272312	0.00172802	0.000303831	0.00131216	0.000398939	0.00131795	0.000528848	0.00841737		0.0058116		0.00883918		0.01777		0.00223956	0.000775209	0.000724483
180.175	C12H21NH	unknown	0.00258835	0.000797922	0.00263191	0.00062268	0.00230419	0.00123091	0.00309924	0.00193214	0.00317124	0.00185356	0.00160092	0.000260229	0.00353643		0.00131432	6.37098e-05	0.00174586	0.000429638	0.00264634	0.000889466	0.00355175	1.77539e-05	0.0020169	0.000286955	0.00124595	9.48654e-05	0.0012918	0.000248606	0.00636598		0.00390103		0.00200265		0.0143803		0.00290534	0.000892372	0.000367567
181.05	C9H8O4H	unknown	0.00084198	0.000292913	0.00104668	0.000314094	0.000666647	0.000337142	0.00239199	0.00292369	0.00224167	0.00176341	0.00105235	7.8183e-05	0.00257802		0.000584335	7.75768e-06	0.000633659	0.000257316	0.000374922	0.000116135	0.0004289	2.23788e-05	0.000296448	6.36555e-05	0.000205143	5.95914e-05	0.00035035	0.000112172	0.00180515		0.00137499		0.00242286		0.00757747		0.000488517	0.000137553	8.8184e-05
181.086	C10H12O3H	unknown	0.0126665	0.0070566	0.018075	0.00569976	0.0117551	0.00521808	0.0124026	0.00998591	0.0114319	0.0056971	0.00654919	0.0025037	0.00645278		0.00243629	0.00344543	0.00697628	0.00392972	0.00687124	0.00249726	0.00869899	5.384e-05	0.00685302	0.00127065	0.00646159	0.00192235	0.00108436	0.00153351	0.00443368		0.0158633		0		0.0193967		0.00612603	0.00536249	0
181.105	C11H16SH	unknown	0.111111	0.0824795	0.0707807	0.0275699	0.0860316	0.0739131	0.071465	0.0490607	0.113118	0.0673839	0.0657696	0.0164125	0.141374		0.0253954	0.000353289	0.0397971	0.0014751	0.0799612	0.0184181	0.0997309	0.0100736	0.053589	0.00779468	0.0319598	0.0034098	0.0251539	5.2174e-05	0.21566		0.0949483		0.0386494		0.207129		0.118174	0.0369726	0.0174705
181.159	C12H20OH	unknown	0.0210999	0.0106233	0.0241177	0.00887396	0.0172368	0.00913271	0.0386851	0.0280545	0.0235004	0.0130487	0.0253776	0.00482324	0.0269597		0.0124498	0.0023938	0.0117344	0.00842144	0.0101236	0.0045726	0.012491	0.00370084	0.0026162	0.000450513	0.00252295	0.000587984	0.00455843	0.00215349	0.0282352		0.0322362		0.0175359		0.0840945		0.00610878	0.00241818	0.00107639
181.195	C13H24H	unknown	0.0121312	0.00540855	0.0163517	0.00592467	0.00714009	0.00503135	0.0146774	0.0110818	0.0129465	0.0100731	0.01626	0.00204994	0.018961		0.00585974	0.000930426	0.0045812	0.00265148	0.00170276	0.00060979	0.00133406	0.00012867	0.00125648	0.00107287	0.00102294	0.000515341	0.00219543	0.0011757	0.0151287		0.0147842		0.0105323		0.0401132		0.00348104	0.00133599	0.000515685
182.118	C10H15NO2H	unknown	0.00608694	0.00353871	0.00486661	0.00206209	0.0048143	0.00223448	0.00693677	0.00359973	0.00533651	0.00220783	0.00486233	0.000735596	0.0125561		0.00315905	8.65735e-05	0.00395737	4.44842e-05	0.00434368	0.00108078	0.00535331	0.000553862	0.00332343	0.000514463	0.0019721	0.000479018	0.00264455	0.000392154	0.0191957		0.00844227		0.00704248		0.0195348		0.00960731	0.00340328	0.00174871
183.029	C8H6O5H	unknown	0.00147153	0.000866143	0.00191449	0.000767324	0.0011011	0.000703309	0.00552923	0.00751628	0.00326648	0.00234925	0.00161256	2.95997e-05	0.003777		0.00105556	3.88936e-05	0.00146955	0.000884868	0.00059106	0.000215239	0.000648235	2.74932e-05	0.000375796	7.92786e-05	0.000273636	1.94594e-05	0.000847433	0.000572742	0.00422396		0.00524917		0.00228902		0.0234129		0.000369959	0.000135915	0.000122123
183.065	C9H10O4H	unknown	0	0	0.00882125	0.0218311	0.00164802	0.00402833	0	0	7.42018e-05	0.000128521	0	0	0		0	0	0	0	0.000209039	0.000190294	0.000226687	0.000319484	0.000116822	0.000173064	0.000332117	0.000218001	0	0	0		0		0		0		0.000645856	0.000913379	0
183.102	C10H14O3H	unknown	0.0431575	0.0392891	0.0289338	0.00775739	0.0307043	0.0158438	0.0358806	0.0186869	0.0528444	0.0324207	0.0204074	0.00380915	0.0670727		0.0113846	0.0027653	0.0173343	0.00286326	0.0160784	0.00401813	0.0226583	0.00330982	0.0159796	0.00573034	0.0124174	0.00358646	0.0134685	8.77108e-05	0.0657709		0.0475821		0.0241446		0.0681203		0.0413651	0.0248865	0.00739665
183.117	C14H14H	unknown	0.0296082	0.0151101	0.0259368	0.0177228	0.0231717	0.0145177	0.0294339	0.0248664	0.0266789	0.0215759	0.0179173	0.00872475	0.0142902		0.00554953	0.00306358	0.0171306	0.00711151	0.060953	0.0137966	0.0672835	0.00549517	0.028702	0.0072264	0.0160123	0.00694616	0.0082566	0.0068485	0.0749132		0.0299877		0.0061347		0.0823955		0.0550623	0.0278382	0.000195777
183.138	C11H18O2H	unknown	0.0121597	0.00748998	0.0146463	0.00714026	0.00753562	0.00468177	0.0174757	0.0114124	0.00877592	0.00105803	0.0151205	0.00254157	0.0198828		0.00939901	0.00124615	0.00676402	0.00100581	0.00477954	0.00222066	0.00540568	0.000603924	0.00204585	0.00083081	0.00238269	0.00126625	0.00397335	0.00151364	0.0162915		0.014833		0.0157436		0.0209928		0.00270349	0.000352122	0.000688931
183.174	C12H22OH	unknown	0.00582894	0.00310561	0.00704123	0.00285746	0.00542313	0.00344525	0.0101303	0.0073677	0.00541801	0.00337796	0.00633777	0.00093601	0.0078753		0.0034429	0.000367877	0.0257702	0.0180931	0.000876833	0.000512067	0.00107359	0.000552391	0.000457763	0.000253494	0.00045776	0.000171028	0.000755135	0.000573692	0.0080425		0.00374535		0.00432319		0.0140987		0.000569611	3.99112e-05	0.000327254
183.211	C13H26H	unknown	0.0109851	0.00527961	0.0167796	0.0050942	0.00513496	0.0027811	0.00917797	0.00664302	0.0102635	0.00635765	0.0105425	0.00181689	0.016092		0.00539599	0.000551241	0.00194798	0.000265477	0.00139298	0.000476688	0.00111187	0.000197922	0.00125131	0.000590547	0.00109755	0.000336028	0.00262939	0.00129564	0.0185948		0.00838006		0.00930797		0.0209081		0.0036971	0.00218549	0.000891423
184.133	C10H17NO2H	unknown	0.00351775	0.0013452	0.00429943	0.00163971	0.00297536	0.00149345	0.00816839	0.0054155	0.00492734	0.00222592	0.00408194	0.000110252	0.00663237		0.00292324	0.000100118	0.00439628	0.00129836	0.00388044	0.00100133	0.00444863	0.000358725	0.002495	0.000614078	0.00161063	0.000614509	0.00233489	0.000294623	0.0113753		0.00692574		0.0130761		0.0197979		0.00543898	0.00276591	0.000860587
185.029	C4H8O8H	unknown	0.000652844	0.000377142	0.000787602	0.000266219	0.000608463	0.000347866	0.00166048	0.00172715	0.00118816	0.000694533	0.000637811	7.18684e-05	0.00112097		0.000461765	9.79029e-05	0.000421414	0.0001732	0.000184503	5.8187e-05	0.000229788	3.07546e-05	0.000127157	3.34918e-05	9.30379e-05	1.77693e-05	0.000312575	0.000191486	0.00105772		0.000820404		0.000932148		0.00781011		9.69719e-05	3.76217e-05	0.000137236
185.132	C14H16H	unknown	0.000230109	0.000325699	0.00140824	0.0033587	0.000367447	0.000639658	0.000294452	0.0003227	9.45327e-05	0.000136706	0.000119176	0.00016854	0		0	0	0.000106847	0.000151104	0.000121157	2.8498e-06	0.000146244	5.35839e-05	9.65195e-05	0.000123261	0.00012529	0.000174523	0	0	0		0		0		3.22496e-05		0.000336734	0.000476213	0
185.154	C11H20O2H	unknown	0.0160727	0.0114015	0.0178372	0.0085491	0.0131679	0.00662614	0.0228533	0.0177286	0.012699	0.00489173	0.0232352	0.00691441	0.0226938		0.00729255	0.000979557	0.00533004	0.00372951	0.00502788	0.00204197	0.00599075	0.0016496	0.00192872	0.000639726	0.00130726	0.000292995	0.00165561	0.000688778	0.0128898		0.00605922		0.0365431		0.0333188		0.00213885	0.000408555	0.000659457
185.19	C12H24OH	unknown	0.00837696	0.0044548	0.0129535	0.00577771	0.00722275	0.00490758	0.0184503	0.0188237	0.00951695	0.00410559	0.00990641	0.00268957	0.0110561		0.00977983	0.00598147	0.00264162	0.0011074	0.00363529	0.00162887	0.00408126	0.000320472	0.00205393	0.000411693	0.00146171	0.000316137	0.00260556	0.0015489	0.00940053		0.00488113		0.00709744		0.0177198		0.00204874	0.000932181	0.000660012
186.076	C8H11NO4H	unknown	0.00475968	0.00269896	0.00417735	0.00232379	0.00257072	0.0017118	0.00855871	0.00793154	0.00772929	0.0052588	0.00297164	0.000218244	0.00596117		0.00219376	0.000178499	0.00200124	0.000746596	0.00113206	0.000327666	0.000951137	0.00029083	0.00111291	0.000277412	0.000799752	0.000133794	0.00235483	0.00119667	0.0074353		0.00611452		0.00690031		0.0149639		0.00157961	0.000836921	0.000407014
187.06	C8H10O5H	unknown	0.00107765	0.000571539	0.00136846	0.000517515	0.00117723	0.000783605	0.00215616	0.00229842	0.00331729	0.00292366	0.000755141	1.75071e-05	0.00146225		0.000334868	2.61651e-05	0.000464846	0.000315128	0.000357449	0.000137027	0.000511647	4.96704e-05	0.000282051	7.2487e-05	0.000168036	3.6341e-05	0.000281913	0.000106337	0.00151301		0.00300111		0.00113895		0.0298388		0.000218854	7.8678e-05	7.36568e-05
187.075	C12H10O2H	unknown	0.030453	0.0139404	0.0311001	0.0121357	0.0174495	0.0133237	0.0206681	0.0124437	0.0301499	0.0218852	0.0400796	0.00841023	0.048734		0.00622389	0.000291868	0.00550404	0.00237459	0.00499416	0.0017237	0.00666188	0.000523946	0.00299053	0.001323	0.0022038	0.000581813	0.00843807	0.00212956	0.0275996		0.0261724		0.0130757		0.0554081		0.0110045	0.0064559	0.00437097
187.096	C9H14O4H	unknown	0.012168	0.00587996	0.0167672	0.00887049	0.00988017	0.00702645	0.010162	0.00881638	0.00751206	0.0030359	0.00840543	0.00427574	0.00914953		0.00403397	0.00032822	0.00440249	0.00117781	0.00532935	0.00159144	0.00639747	0.00100292	0.00272573	0.000238501	0.00235034	0.000541484	0.00275637	0.00105508	0.0212168		0.0115909		0.00223568		0.00768548		0.0054309	0.0013699	0.00194628
187.148	C14H18H	unknown	0.00464859	0.00201564	0.00465394	0.00191233	0.00372017	0.00150771	0.00710088	0.00534207	0.00464324	0.00183407	0.00519767	0.000876567	0.00634999		0.00230062	9.30657e-05	0.00571703	6.25978e-05	0.0114289	0.00281213	0.0141047	0.0026898	0.00688579	0.00163947	0.00452375	0.00137442	0.00348301	0.000641083	0.0201524		0.0119491		0.00553225		0.0237208		0.0239213	0.00746475	0.000891685
187.206	C12H26OH	unknown	0.0115313	0.00849957	0.0133068	0.00622876	0.0108612	0.00590495	0.0166225	0.0128068	0.00861024	0.0034864	0.018974	0.00521206	0.016322		0.00667472	0.0014405	0.00577359	0.00505552	0.00320794	0.00144153	0.00362059	0.000693297	0.00134075	0.00049506	0.000826498	0.000156972	0.0015487	0.000906029	0.00817234		0.00509635		0.029915		0.032543		0.00158154	0.000555289	0.000399805
189.091	C12H12O2H	unknown	0.000971039	0.000434022	0.00139619	0.000751864	0.000919052	0.0006698	0.00183333	0.00135424	0.000791469	0.00048844	0.00109027	0.000826577	0.0025044		0.000786198	7.54944e-06	0.00107489	0.000296882	0.000650642	9.1384e-05	0.000760702	8.10239e-05	0.000511823	0.000199933	0.000366139	0.000173105	0.000638365	5.66427e-05	0.00374043		0.00259363		0.00167887		0.00498247		0.00235325	0.000852539	0.000278748
189.127	C13H16OH	unknown	0.0202404	0.0138378	0.0175899	0.00948022	0.0145862	0.00913842	0.0172819	0.0129383	0.0214779	0.0150117	0.0136549	0.00351882	0.0179526		0.00487576	0.000563192	0.00571995	0.00180669	0.00604434	0.000956388	0.00761551	0.000976583	0.00413841	0.00103133	0.00320181	0.000684514	0.00365642	0.0010171	0.0239223		0.0224263		0.00654638		0.0330091		0.00848792	0.00286314	0.00166655
189.164	C14H20H	unknown	0.00686155	0.00329386	0.00800743	0.00352364	0.00437483	0.00221609	0.0120638	0.00884605	0.00732658	0.00411112	0.0120973	0.00339686	0.00741662		0.00313495	0.000365799	0.00334331	0.00212593	0.00385989	0.000918308	0.00407925	0.000126907	0.000721355	0.000215243	0.0005616	4.70095e-05	0.00160127	0.000509285	0.0136707		0.00938538		0.00856694		0.0243196		0.00231595	0.000733492	0.000499598
190.086	C11H12NO2	unknown	0.0105843	0.00755792	0.00917743	0.00341201	0.00733584	0.00298201	0.0113323	0.00866758	0.00774701	0.00404556	0.0167658	0.00484782	0.0171583		0.00920115	0.00230066	0.0090422	0.00814566	0.00391438	0.0020659	0.00476791	0.000299489	0.0018633	0.000661647	0.00115816	0.000209021	0.00189826	0.00146255	0.00500559		0.00311132		0.0377449		0.0318708		0.0010751	0.000166639	0.00018907
190.123	C12H15NOH	unknown	0.00167118	0.000787142	0.00166453	0.00056002	0.00133934	0.000777918	0.00259657	0.00216124	0.00303908	0.00202157	0.00147732	0.00022669	0.00248872		0.000681088	6.59912e-05	0.000815851	0.000375457	0.00060695	0.000210344	0.000855555	7.96726e-05	0.000425212	0.000102135	0.000283002	3.15987e-05	0.000548476	0.000195095	0.00289917		0.00280099		0.00247877		0.0157385		0.000427758	0.000159912	0.000153841
191.055	C7H10O6H	unknown	0.000800622	0.000418321	0.000843493	0.000296669	0.000618144	0.000369276	0.0017708	0.00162079	0.00132117	0.000782201	0.000937128	0.000132452	0.00121538		0.000383872	7.29903e-06	0.000498682	0.000184937	0.00032311	0.0001203	0.00040482	3.74178e-05	0.000208	3.2749e-05	0.000127959	4.84559e-06	0.000310586	0.0001972	0.0014065		0.00130545		0.000821076		0.00983945		0.00022761	4.58858e-05	7.37615e-05
191.07	C11H10O3H	unknown	0.00983919	0.00588402	0.00750483	0.00366534	0.00527848	0.00404932	0.0055412	0.00318439	0.0060341	0.00225794	0.00616677	0.00153709	0.0168721		0.00203759	0.00034117	0.00256058	0.000557912	0.00130961	0.000476782	0.0017699	0.000229618	0.00105059	0.000202326	0.000898571	0.000189203	0.00142656	0.000363145	0.0130878		0.00672386		0.0019596		0.0117342		0.00605059	0.0032028	0.00155108
191.107	C12H14O2H	unknown	0.0211757	0.0155333	0.0151658	0.00807859	0.0155771	0.0125439	0.0126718	0.00999934	0.0198258	0.0159749	0.0134777	0.0039757	0.0178995		0.00432548	0.000342772	0.00395226	0.000816865	0.00535669	0.0015982	0.00750898	0.000251559	0.0031613	0.000844057	0.00217853	0.000287015	0.00348537	0.00144141	0.0183326		0.0191139		0.00612483		0.0271497		0.00808731	0.00291127	0.00200144
191.179	C14H22H	unknown	0.0142736	0.0102104	0.0115247	0.00734633	0.0105101	0.00682802	0.013956	0.0100563	0.0172704	0.013852	0.0125301	0.00267822	0.0135216		0.00350706	0.000392861	0.00486481	0.00123023	0.00500676	0.000574703	0.00597425	0.000777963	0.00236221	0.000526052	0.00154139	0.000332101	0.0024382	0.000295591	0.0165876		0.0192429		0.00728775		0.0347344		0.00738311	0.00239698	0.00123089
193.05	C10H8O4H	unknown	0.0134125	0.00716139	0.0131972	0.00402265	0.00975637	0.00238167	0.0189983	0.0123594	0.0138336	0.0079853	0.021449	0.00463731	0.0262531		0.0111564	0.00265101	0.00364423	0.00211365	0.00938032	0.00451461	0.0113744	0.000585598	0.00353336	0.000974251	0.00224825	0.000335798	0.00252726	0.00158138	0.0122539		0.00972598		0.0298536		0.0533993		0.00385514	0.000875507	0.000583509
193.086	C11H12O3H	unknown	0.00460056	0.0026129	0.00296457	0.00139926	0.00367402	0.0025337	0.00256179	0.00248207	0.0025816	0.00184124	0.00216316	0.00115588	0.00373852		0.00109487	0.000204854	0.00716062	0.00524324	0.00157118	0.000748195	0.00230541	2.14211e-05	0.000755929	0.000282048	0.000585338	0.000155452	0.000919951	0.000625211	0.00337776		0.00283916		0.0014755		0.00376261		0.00102592	0.000460113	0.000567662
193.122	C12H16O2H	unknown	0.0187247	0.0137355	0.0137218	0.00801185	0.0144192	0.0106279	0.0150719	0.0126037	0.0187555	0.014572	0.0124788	0.00265286	0.0151287		0.0044843	0.000251272	0.00438808	0.000767706	0.00940521	0.00314059	0.0128245	0.000510957	0.00544056	0.000701705	0.00352878	0.000475503	0.00335274	0.00036281	0.0302406		0.0245208		0.00607346		0.0524399		0.0133175	0.00408567	0.00187136
193.159	C13H20OH	unknown	0.00620382	0.0017904	0.00598313	0.00223299	0.00422511	0.00183271	0.0084075	0.00523099	0.00811021	0.00539118	0.00756954	0.0010408	0.00854288		0.00319814	0.000154158	0.007574	0.004391	0.00221989	0.00027176	0.00229657	0.000108803	0.00120016	0.000321895	0.00094295	0.000129741	0.00157578	0.000518214	0.00942563		0.0110392		0.00491092		0.0258072		0.00368618	0.00118533	0.000608778
193.195	C14H24H	unknown	0.00607554	0.00305802	0.0075649	0.00249845	0.00487136	0.00271214	0.00908252	0.00711345	0.00689279	0.00424295	0.0105276	0.00302022	0.00901733		0.00378457	0.000507206	0.00384548	0.00303833	0.00283884	0.00107756	0.00293431	0.000452316	0.00140522	0.000337976	0.000861908	0.000136086	0.0016143	0.00125453	0.0264211		0.00669048		0.00881915		0.02394		0.00135677	0.000275941	0.000258201
195.065	C10H10O4H	unknown	0.00468694	0.00160051	0.00599521	0.00200816	0.0041392	0.00191357	0.00923304	0.00587623	0.00650119	0.0034578	0.00751666	0.00113876	0.00767667		0.00397291	0.000729343	0.00242301	0.000967324	0.00223678	0.000926701	0.00256609	0.000238647	0.00127738	0.000261512	0.000851071	8.35249e-05	0.00142277	0.000688528	0.00780405		0.0061526		0.0126444		0.0203666		0.00226956	0.000713273	0.000475967
195.102	C11H14O3H	unknown	0.0191092	0.0260417	0.00888777	0.00271632	0.0142201	0.0152356	0.00747409	0.00498269	0.0131945	0.00884774	0.00734458	0.00212842	0.0280257		0.00243133	7.75513e-05	0.00224447	0.00109072	0.00275579	0.000661536	0.00402689	0.000339169	0.00189782	0.00106737	0.00119638	0.000167021	0.00182569	0.000393642	0.0121426		0.00955797		0.00739465		0.012046		0.00432201	0.0029387	0.00119019
195.138	C12H18O2H	unknown	0.011151	0.00333806	0.0100681	0.00523758	0.00810376	0.0042366	0.0162709	0.0173331	0.0134242	0.00824417	0.0102299	0.0031691	0.0101063		0.00387394	0.000393111	0.0147654	0.00209148	0.0493613	0.016964	0.0672703	0.0043412	0.0295792	0.00430869	0.0150391	0.0036673	0.00865989	0.0022237	0.0815805		0.0266016		0.00733335		0.126214		0.0512852	0.013928	0.00344147
195.174	C13H22OH	unknown	0.00458141	0.00182378	0.00518778	0.00191793	0.00413171	0.00219653	0.00781178	0.00510198	0.00546824	0.00303792	0.00577619	0.00100126	0.00718353		0.00291724	0.000441776	0.00423083	0.00380056	0.000457944	7.98162e-05	0.000448158	0.000186427	0.000243451	0.000215906	0.000254424	7.13417e-05	0.00106156	0.000736091	0.00315998		0.00599534		0.00437278		0.0176362		0.00046345	0.000100497	0.000250076
195.211	C14H26H	unknown	0.00370786	0.00138017	0.00516107	0.00153834	0.00359276	0.00167038	0.00732265	0.00500225	0.00611373	0.00379203	0.00528877	0.000805652	0.00706184		0.00238816	0.000172867	0.00148625	0.000782442	0.000777742	0.000294681	0.000600059	7.31137e-05	0.000409833	0.00028572	0.000361014	6.80621e-05	0.00108285	0.000722704	0.0104049		0.00427415		0.00629786		0.0144411		0.000679687	0.000315441	0.000321464
196.133	C11H17NO2H	unknown	0.00182137	0.00038045	0.00217866	0.000682665	0.00129932	0.000458419	0.00298091	0.00187837	0.00196285	0.000900008	0.00180592	0.00022811	0.0030672		0.000981587	0.000139814	0.00138116	5.40127e-05	0.00193183	0.000665888	0.00247198	0.000329975	0.00163764	0.000426039	0.000900527	0.000202271	0.000875019	2.11767e-05	0.0078079		0.00325416		0.00371417		0.0120238		0.00409842	0.00129992	0.000374617
197.081	C10H12O4H	unknown	0.00121277	0.000683505	0.0016562	0.000915298	0.000859944	0.00035025	0.0068365	0.0111939	0.00457136	0.00410578	0.00166843	7.77818e-07	0.00482938		0.000777583	0.000114969	0.000874916	0.000427391	0.000323256	0.000143929	0.000319569	3.1954e-05	0.000252562	8.60491e-05	0.000148784	2.36588e-05	0.000795183	0.000671153	0.00490028		0.0065908		0.00270821		0.028382		0.000216326	9.57434e-05	4.76198e-05
197.132	C15H16H	unknown	0.00903246	0.00485678	0.00755389	0.00266431	0.00744641	0.00435112	0.0095079	0.00628321	0.00948739	0.00565189	0.00598881	0.00192562	0.00993987		0.00319025	0.000350752	0.00446392	0.00108978	0.00802112	0.00178403	0.0119041	0.00188869	0.00665585	0.00268838	0.00402689	0.000400133	0.00374091	3.093e-05	0.0285978		0.0211119		0.00764214		0.0385389		0.0181527	0.0106726	0.00195398
197.154	C12H20O2H	unknown	0.0091007	0.00730138	0.0105292	0.00602019	0.00508304	0.00245931	0.0134623	0.014569	0.00659668	0.00293032	0.0102192	0.0032491	0.00801219		0.00303317	0.000363137	0.00286351	0.00137859	0.00334872	0.0016582	0.00411649	0.000522896	0.00148303	0.000368664	0.0010453	8.10846e-05	0.00122903	0.000393065	0.0086873		0.00396628		0.0102442		0.0154486		0.00167018	0.000256546	0.000405519
197.19	C13H24OH	unknown	0.00409931	0.0019352	0.0059821	0.00220448	0.00456179	0.00294471	0.00712362	0.00546117	0.00451982	0.00231824	0.00466537	0.00116167	0.00558573		0.00296633	0.000525436	0.00166037	0.00113539	0.00115214	0.000564961	0.00112574	0.000212691	0.000594147	0.000141211	0.000493816	0.000146604	0.000931379	0.000627925	0.0038197		0.00285676		0.00376416		0.00923364		0.000602353	0.000138521	0.00022778
197.226	C14H28H	unknown	0.00317534	0.00155476	0.00445681	0.00155022	0.00231394	0.0014185	0.00646427	0.00470201	0.00523063	0.00317571	0.00315894	0.000564409	0.00522665		0.00214707	0.000199833	0.00170806	0.000732101	0.00133183	0.000531757	0.00127401	0.00020999	0.0010209	0.000256038	0.000694235	5.38228e-05	0.00142441	0.000662246	0.0077584		0.00429031		0.00605964		0.0112521		0.00189502	0.00110472	0.000311268
198.076	C9H11NO4H	unknown	0.00267861	0.00102818	0.00380645	0.00112052	0.00217487	0.00108931	0.00658024	0.00485905	0.00462261	0.00226684	0.00352403	0.00022606	0.00520232		0.00214972	0.000289784	0.00233221	0.000774174	0.00177504	0.000519008	0.00199367	1.86187e-05	0.0011746	0.000279817	0.000766837	9.82545e-05	0.0014641	0.000623418	0.00711891		0.00512877		0.012438		0.0158674		0.00179672	0.000848358	0.000343357
198.112	C10H15NO3H	unknown	0.000931774	0.000478125	0.000933868	0.000355413	0.000853143	0.000603155	0.00121552	0.000945038	0.00125418	0.000839657	0.000532308	5.87227e-05	0.00115059		0.000412186	5.62455e-06	0.000450821	0.000240466	0.000335755	0.000102733	0.000467924	7.56869e-05	0.000270047	7.38728e-05	0.000181501	4.36965e-05	0.00032121	0.000164947	0.00133029		0.00126534		0.000873957		0.00645014		0.000239733	9.43346e-05	0.000136766
199.06	C9H10O5H	unknown	0.00107636	0.000591588	0.00111331	0.000407313	0.000899814	0.00051907	0.00179896	0.00150857	0.00167145	0.00108848	0.000858848	5.33531e-05	0.00151826		0.000570099	5.42201e-05	0.000532528	0.000222309	0.000379589	0.000101084	0.000501824	6.59293e-05	0.000256475	5.61824e-05	0.000157924	2.63848e-05	0.000349635	0.000174027	0.00156396		0.0013471		0.00120672		0.0106534		0.000168159	5.83366e-05	0.000112517
199.075	C13H10O2H	unknown	0.00302806	0.00158835	0.00274862	0.000845077	0.00257932	0.00143136	0.00235389	0.00155133	0.00235733	0.0014741	0.00160423	0.000398457	0.00355813		0.00108604	1.58356e-05	0.000979231	0.000554513	0.00107784	0.000383416	0.0015737	3.47473e-05	0.000739432	0.000479484	0.000660334	0.000208146	0.000907517	0.000200486	0.00517853		0.00428048		0.00185714		0.0043811		0.00156998	0.00165677	0.000657767
199.096	C10H14O4H	unknown	0.00624202	0.00460342	0.00504148	0.00280903	0.00493261	0.00412433	0.00487588	0.00433178	0.00492358	0.00355866	0.0027285	0.000874653	0.00525588		0.00168507	9.27252e-05	0.00193374	0.000776714	0.00193752	0.000606636	0.0026337	0.00030194	0.00121608	0.000249408	0.00109823	0.000324872	0.00172651	0.000543249	0.00624967		0.00535316		0.00291591		0.00754708		0.00246514	0.00102068	0.000862682
199.112	C14H14OH	unknown	0.00473309	0.00195816	0.00458426	0.00157054	0.00364152	0.0025323	0.00521675	0.00355943	0.00473836	0.00274894	0.00358128	0.000797009	0.00514724		0.00185639	2.45041e-05	0.00363502	0.000882858	0.00731156	0.00205123	0.00912603	0.000939585	0.00489638	0.000970642	0.00272497	0.000570485	0.00185862	5.91002e-05	0.0183425		0.00926167		0.00324853		0.0189674		0.010005	0.0033245	0.000855143
199.148	C15H18H	unknown	0.00500556	0.00239394	0.00515718	0.00242854	0.00358848	0.00231867	0.00634422	0.00611458	0.00502048	0.00309885	0.00361874	0.000967323	0.00420592		0.00160069	0.000175524	0.00251259	0.000875687	0.00270184	0.00062678	0.00325511	0.00015051	0.00145273	0.000250701	0.00107298	7.96507e-05	0.00127464	0.000199193	0.00758537		0.00580167		0.00188902		0.0107661		0.00221605	0.000625337	0.000505067
199.169	C12H22O2H	unknown	0.00660875	0.00516001	0.00894783	0.00400421	0.00465797	0.00165345	0.0112459	0.00939584	0.00585682	0.00205677	0.01586	0.00428508	0.00920545		0.00333652	0.000604359	0.00175276	0.00110683	0.00226184	0.00108152	0.00261276	0.000449851	0.000919675	0.000271532	0.0005975	0.000122889	0.00158799	0.00119345	0.00595141		0.002635		0.0344462		0.0186344		0.000904309	0.000191089	0.000271558
199.206	C13H26OH	unknown	0.0198313	0.0142731	0.0269174	0.0123579	0.00828156	0.00596014	0.0115859	0.0105833	0.0111442	0.00583267	0.0233432	0.00776185	0.0192097		0.00676201	0.00127918	0.00193451	0.000861868	0.00228465	0.000950132	0.00255372	0.000252402	0.00133706	0.000312956	0.000938876	0.000196464	0.00196068	0.00127349	0.00766729		0.00367596		0.00685409		0.0149872		0.00121418	0.000458707	0.000389344
200.128	C10H17NO3H	unknown	0.00246603	0.00138648	0.00360207	0.00225133	0.00161276	0.000845157	0.00633227	0.00615029	0.00611334	0.00425869	0.00161878	7.41774e-05	0.00546222		0.00191291	3.29715e-07	0.0017789	0.000659557	0.00135998	0.000442184	0.00126226	0.000333265	0.00121595	0.000278532	0.000884452	0.00018707	0.00200656	0.00106966	0.00781972		0.00634667		0.00857959		0.0175789		0.0016307	0.000700549	0.000274995
201.039	C8H8O6H	unknown	0.000663562	0.000389852	0.000767038	0.000313741	0.000522327	0.000338388	0.00130937	0.00116698	0.00112719	0.000718359	0.000651595	0.000101046	0.000962447		0.000351157	2.80928e-05	0.00040225	0.000213909	0.000254502	6.27218e-05	0.000332465	3.39834e-05	0.000164698	3.70191e-05	0.000101274	1.88587e-05	0.000211745	9.68397e-05	0.00128881		0.00084316		0.000898112		0.00914512		0.000124966	2.8394e-05	5.99867e-05
201.076	C9H12O5H	unknown	0.00125208	0.000623545	0.00159366	0.000564037	0.00110738	0.000699499	0.00124441	0.000659194	0.00112146	0.000588112	0.000857219	0.000202593	0.00193986		0.000611349	8.14537e-08	0.000586517	0.000324188	0.00048201	0.000146688	0.000712105	3.71382e-05	0.000304373	0.000184126	0.000321006	0.000184772	0.000562555	0.000199396	0.00262181		0.00199299		0.000610593		0.00171439		0.000645826	0.000646666	0.000433421
201.112	C10H16O4H	unknown	0.00468043	0.00228841	0.00430728	0.00137991	0.00360215	0.00227311	0.00435634	0.00275103	0.00525295	0.00347788	0.00384423	0.000855632	0.00548103		0.00142552	1.56057e-05	0.00136369	0.000731119	0.00139896	0.000441222	0.00181514	6.21388e-05	0.000801774	0.000368395	0.000605559	0.000153961	0.00126504	0.0003444	0.00685241		0.0076888		0.00281891		0.0118912		0.00236664	0.00153683	0.000613727
201.127	C14H16OH	unknown	0.00397664	0.00169544	0.00395698	0.00134059	0.0027004	0.00144721	0.00479699	0.00319053	0.00422929	0.0019696	0.00453514	0.00133507	0.00418241		0.00143063	0.000176647	0.00284093	0.000602246	0.00772522	0.0020699	0.00858455	0.00118357	0.00363095	0.00078188	0.00228765	0.000797274	0.00163413	0.000255871	0.00931164		0.00508584		0.00397538		0.0146882		0.00599753	0.00227151	0.00050134
201.164	C15H20H	unknown	0.00310386	0.00132718	0.00363386	0.0015761	0.00253081	0.00134743	0.00542004	0.004261	0.00410153	0.00234848	0.00386019	0.00137864	0.0038877		0.00126244	6.65435e-05	0.00195217	0.000693017	0.00229556	0.000575089	0.00249895	0.000101204	0.00125154	0.0002632	0.000824371	0.000106015	0.000872318	3.10943e-05	0.00571595		0.00407103		0.0030778		0.0097586		0.00204035	0.000872946	0.000281795
201.185	C12H24O2H	unknown	0.00701729	0.005189	0.00958605	0.00401085	0.00503447	0.00212112	0.0101423	0.00774332	0.00594802	0.00240593	0.0218183	0.00744097	0.0104482		0.00553379	0.00147105	0.00192261	0.00141063	0.00333306	0.0017827	0.00354751	6.30237e-05	0.00108623	0.000385659	0.000698049	0.000182148	0.00401513	0.00357494	0.00600762		0.00273007		0.0270978		0.0221732		0.000934618	0.000121488	0.000172162
203.07	C12H10O3H	unknown	0.0124919	0.00940339	0.0212005	0.00778505	0.00279752	0.0021448	0.00352797	0.00200851	0.00793432	0.00520295	0.0152319	0.00526284	0.0120883		0.00253298	2.67168e-05	0.000635065	0.000333401	0.000741373	0.000277029	0.000858896	5.20187e-05	0.000455956	0.000101661	0.000387923	9.035e-05	0.000797792	0.000504987	0.0131368		0.00305945		0.0042556		0.0157412		0.000798302	0.000383146	0.000183059
203.091	C9H14O5H	unknown	0.00574231	0.00392433	0.00507115	0.00284594	0.0048772	0.00394556	0.00472853	0.00454952	0.00443006	0.00392454	0.00281829	0.000609234	0.0045862		0.00161454	0.00023846	0.00148373	0.000654716	0.002067	0.000974515	0.00314775	0.000447843	0.00130085	0.000257036	0.00104115	0.000255374	0.00130868	0.000638353	0.00594128		0.00485852		0.00186351		0.00594871		0.00175652	0.000934609	0.00082619
203.179	C15H22H	unknown	0.00438227	0.0028382	0.00377027	0.00176269	0.00381017	0.00319046	0.0054172	0.00511966	0.00342144	0.00246406	0.0023675	5.91055e-05	0.00346371		0.00178301	0.000401326	0.00247056	0.00132395	0.00263973	0.00156723	0.00385396	0.00155947	0.00206579	0.000389014	0.00177086	0.000226978	0.00121958	0.00042935	0.0058978		0.00354201		0.00172087		0.00704501		0.00148848	0.000362914	0.000570986
204.102	C12H13NO2H	unknown	0.0125966	0.00928891	0.0150596	0.00527108	0.00979296	0.00526529	0.0159754	0.0126846	0.00962644	0.00399753	0.0469027	0.013123	0.0123012		0.0172636	0.0067575	0.00403348	0.0029688	0.00719689	0.00372138	0.0078742	0.000248644	0.00241491	0.000897081	0.00144291	0.000340074	0.0165825	0.0157453	0.00589642		0.00340812		0.0368981		0.044008		0.00120911	3.47754e-05	0.000269357
205.071	C8H12O6H	unknown	0.000578739	0.00030104	0.000576644	0.000205877	0.000487962	0.00035703	0.000886637	0.000759017	0.000876568	0.000639069	0.000422361	6.69304e-05	0.000654081		0.000215733	6.33868e-06	0.000281675	0.000109963	0.000217296	9.94974e-05	0.000313818	7.85062e-05	0.000151295	1.87752e-05	0.000111596	2.83987e-06	0.000162476	7.27495e-05	0.000836483		0.000801305		0.000574126		0.00526214		0.000106028	3.05384e-05	5.28744e-05
205.086	C12H12O3H	unknown	0.0183156	0.0116259	0.0150279	0.00831384	0.0118626	0.0125782	0.00776382	0.00469996	0.0140817	0.0137834	0.0154312	0.00226785	0.0195671		0.001683	0.000243861	0.00175556	0.000116078	0.00353368	0.00158505	0.00439283	0.000422527	0.00175061	0.000331144	0.00128172	0.000112498	0.00186295	0.000727782	0.0119568		0.0139697		0.00338342		0.0195207		0.00626267	0.00179666	0.00193625
205.195	C15H24H	Sesquiterpenes	0.0177871	0.0139287	0.0134713	0.00753307	0.0133637	0.0112381	0.0117334	0.0110052	0.0186129	0.0156278	0.0104503	0.0036477	0.0131427		0.00328757	6.33168e-05	0.00326281	0.000814369	0.00476936	0.00186518	0.00683761	0.000781442	0.00272911	0.000601243	0.00201273	0.000388835	0.00282851	0.00132438	0.012588		0.0123538		0.0047973		0.0211826		0.00528403	0.00212257	0.00166385
206.081	C11H11NO3H	unknown	0.000891114	0.0004239	0.000837522	0.000302382	0.000775483	0.000531629	0.00105527	0.000843104	0.00115052	0.000778565	0.000552381	5.537e-05	0.00115006		0.000346556	7.40786e-07	0.000384124	0.000141933	0.00033947	0.000141051	0.000508724	8.37045e-05	0.000287471	4.5779e-05	0.000193075	1.91475e-05	0.000243438	9.86998e-05	0.00104489		0.00117507		0.000783545		0.00588033		0.000220818	8.74846e-05	0.000104117
206.118	C12H15NO2H	unknown	0.000726572	0.000398632	0.00069197	0.00026154	0.000555011	0.000393787	0.0011036	0.00103745	0.000903125	0.00060189	0.000553945	0.000103315	0.000757398		0.000287055	2.39355e-05	0.000358967	0.000187475	0.000263334	0.000120916	0.000404103	0.000124476	0.00018422	4.23068e-05	0.000129103	2.09579e-05	0.000230702	0.000138478	0.000999542		0.000848788		0.000510602		0.00566673		0.000159912	5.31809e-05	6.4472e-05
207.065	C11H10O4H	unknown	0.00471949	0.00411405	0.00308558	0.00155323	0.00373861	0.00308315	0.00274317	0.00274429	0.00330106	0.00286436	0.00211331	0.000854187	0.00380276		0.000725292	4.07507e-05	0.000731109	0.000368797	0.00122309	0.00058532	0.00182784	9.79275e-05	0.000694901	0.000186902	0.00052059	0.000126106	0.000585175	0.000330318	0.0031714		0.00315612		0.00118215		0.00454418		0.000979179	0.000588768	0.000390399
207.102	C12H14O3H	unknown	0.0082632	0.00681495	0.0060495	0.00410094	0.00610882	0.00423373	0.00686642	0.00662163	0.00883452	0.00792788	0.00429581	0.00113188	0.0069475		0.00156209	0.000201329	0.00209186	0.000396861	0.0029794	0.000920122	0.00424873	0.000783048	0.00184242	0.000262079	0.00127817	0.000115188	0.00114498	0.000211204	0.00941497		0.00761971		0.00267583		0.0160887		0.00357269	0.00119769	0.000640547
207.123	C9H18O5H	unknown	0.0076545	0.00466455	0.00679969	0.00311006	0.00451272	0.00253963	0.00810378	0.00926948	0.00595609	0.0043199	0.00605721	0.00180346	0.00759476		0.00285396	0.000262928	0.0021821	0.00117978	0.00263888	0.00147298	0.00378672	0.000964895	0.00109103	0.000299409	0.000754723	0.000137104	0.00113786	0.000662453	0.00747263		0.00507857		0.00435109		0.0127849		0.00139157	0.000409937	0.000464208
207.211	C15H26H	unknown	0.00380211	0.00169351	0.00515889	0.00188411	0.00316245	0.00163351	0.00793819	0.00531878	0.00558934	0.00305755	0.00807781	0.00164216	0.00573663		0.00349985	0.000925246	0.00160694	0.000741293	0.00168838	0.000756975	0.00183382	0.000143931	0.000982649	0.000242005	0.000621446	5.33262e-05	0.000872761	0.000469527	0.00546829		0.00424109		0.0148499		0.0190353		0.00117573	0.000258455	0.000313494
209.081	C11H12O4H	unknown	0.00557466	0.00402678	0.00410161	0.00193231	0.0041156	0.00309948	0.00368352	0.00299286	0.00485748	0.0039652	0.0030455	0.00100718	0.00468035		0.00117453	6.80215e-05	0.00125434	0.000350041	0.00378846	0.00159508	0.00590522	0.000592533	0.00263655	0.000229742	0.00162895	0.00104935	0.000906735	0.000168519	0.00743204		0.00695898		0.0022668		0.0179663		0.00354514	0.00074496	0.00072633
209.154	C13H20O2H	unknown	0.004314	0.00231726	0.0058938	0.00201154	0.00457473	0.00317172	0.00732498	0.00498308	0.00542627	0.00294568	0.00593536	0.00183528	0.00550806		0.00243236	0.000114285	0.00173606	0.00125007	0.00359037	0.00195811	0.00355128	0.000351382	0.000926269	0.00018878	0.00061243	0.000165094	0.0013007	0.00104578	0.00866635		0.00458778		0.00416931		0.0220313		0.000729664	0.000147539	0.000292024
209.19	C14H24OH	unknown	0.00347657	0.00176461	0.00382014	0.00162576	0.00267039	0.00177715	0.00701326	0.00632036	0.00603773	0.00427974	0.00509888	0.00113963	0.00413377		0.00147104	0.000194961	0.000893541	0.000407033	0.00143278	0.000649656	0.00152492	2.58874e-05	0.00071239	0.000131795	0.000462675	0.000124671	0.000717887	0.000498251	0.00312748		0.0024157		0.00492164		0.0104335		0.000887236	0.000263312	0.000488048
209.226	C15H28H	unknown	0.00142157	0.000486369	0.00192767	0.000603526	0.00122222	0.000645279	0.00340426	0.00216095	0.00194257	0.000979069	0.00170428	5.86611e-06	0.00267675		0.0010998	0.000175776	0.000884535	0.000344285	0.000737425	0.000255339	0.000881645	8.96093e-05	0.000487304	0.00010012	0.000286914	2.59899e-05	0.000506497	0.000241318	0.00305968		0.0026204		0.00391708		0.00689164		0.000752177	0.000219939	0.000234955
210.149	C12H19NO2H	unknown	0.000808343	0.000372038	0.00115958	0.000653238	0.000548646	0.00022712	0.00456327	0.00758197	0.00342398	0.00310765	0.00113102	9.07027e-05	0.0035995		0.000500734	8.415e-05	0.00058801	0.000266253	0.000265379	0.000124631	0.000268069	2.43531e-05	0.000204837	6.51403e-05	0.000104387	9.14561e-06	0.000584909	0.000544546	0.0039522		0.00504012		0.00211463		0.0225965		0.000180453	6.27369e-05	3.62906e-05
211.096	C11H14O4H	unknown	0.00414606	0.00202712	0.00367842	0.00168617	0.00350362	0.00269289	0.00523504	0.00500169	0.00439058	0.00301086	0.00364994	0.00181936	0.00386862		0.00120549	7.60725e-05	0.00215519	8.17476e-05	0.00781002	0.00226736	0.0114886	0.000530488	0.00534017	0.000922111	0.00281482	0.000979617	0.0018113	8.89419e-05	0.0141044		0.00689952		0.00467861		0.0240893		0.00974371	0.0036299	0.0010386
211.112	C15H14OH	unknown	0.00464907	0.00307859	0.00400221	0.00242586	0.0034929	0.00262757	0.00510695	0.00428627	0.00560925	0.00344237	0.00361261	0.00164087	0.00409369		0.00120223	6.03985e-05	0.00205523	0.000579269	0.00291408	0.000771968	0.00366659	0.00033152	0.00151206	0.000263464	0.00111181	0.000136191	0.00112402	0.000135724	0.00642784		0.00538437		0.003859		0.0119585		0.00236521	0.000626161	0.000641343
211.206	C14H26OH	unknown	0.00432805	0.00283928	0.0060162	0.00274468	0.00303614	0.00227283	0.00503417	0.00364277	0.00647177	0.00427794	0.00444498	0.00101355	0.00581779		0.00197842	0.000440957	0.00130497	0.00040583	0.00166843	0.000615127	0.00180091	1.76112e-05	0.000983589	0.000179501	0.000652535	0.000122822	0.00118068	0.000607809	0.00623432		0.00285709		0.00554789		0.0116133		0.00120281	0.000407502	0.000303557
211.242	C15H30H	unknown	0.00262476	0.00111371	0.00423425	0.00143064	0.00216101	0.0011287	0.00764049	0.00596302	0.00572841	0.0026162	0.00482553	0.000920497	0.00561037		0.00246467	0.000396505	0.00226138	0.000807046	0.00143912	0.000502397	0.00157601	3.40359e-05	0.00100781	0.000261831	0.000661769	7.55185e-05	0.00134565	0.000775699	0.00644683		0.00472131		0.0157904		0.0156644		0.00117735	0.000546559	0.000276449

## Sheet: Fuel Specific Emission Factors
Fire-integrated emission factors by specific fuel type									*"Contaminated" refers to chaparral fuels collected from a heavily polluted site near San Dimas, CA
			Emission factor (g VOC:kg fuel)						*"Uncontaminated" refers to chaparral fuels collected from a cleaner site in North Mountain, CA
			Ponderosa Pine		Lodgepole pine		Douglas Fir		Subalpine Fir		Engelmann Spruce		Loblolly Pine		Jeffrey Pine		Juniper		Sage		Manzanita, "uncontaminated"*		Manzanita, "contaminated"*		Chamise, "uncontaminated"*		Chamise, "contaminated"*		Ceanothus		Bear Grass		Rice Straw		Peat		Dung		Excelsior		Building Material
Exact m/z (Th)	Ion formula	NMOG identity	Average ER	Standard deviation	Average ER	Standard deviation	Average ER	Standard deviation	Average ER	Standard deviation	Average ER	Standard deviation	Average ER	Standard deviation	Average ER	Standard deviation	Average ER	Standard deviation	Average ER	Standard deviation	Average ER	Standard deviation	Average ER	Standard deviation	Average ER	Standard deviation	Average ER	Standard deviation	Average ER	Standard deviation	Average ER	Standard deviation	Average ER	Standard deviation	Average ER	Standard deviation	Average ER	Standard deviation	Average ER	Standard deviation	Average ER	Standard deviation
18.0338	NH4	ammonia	0.689514	0.421953	0.678006	0.187343	0.489239	0.211838	1.49249	1.58777	1.65928	1.42517	0.399372	0.035866	1.4053	(single sample)	0.652533	0.115439	0.776067	0.281618	0.449672	0.0697731	0.565036	0.0415029	0.494504	0.0486702	0.340713	0.075892	1.07439	0.282091	1.26455	(single sample)	0.364569	(single sample)	1.43731	(single sample)	3.54255	(single sample)	0.145628	0.0526438	0.142462	(single sample)
26.0151	C2H2	acetylene (fragments on this mass subtracted)	0.370387	0.215041	0.416132	0.215178	0.3699	0.219538	0.579566	0.282434	0.302397	0.139259	0.212115	0.00568759	0.51308		0.523853	0.12797	0.40917	0.171792	0.126312	0.0367812	0.139992	0.0048989	0.14696	0.0073898	0.130734	0.0414129	0.223949	0.0800551	0.974334		0.327418		0.492998		0.753956		0.175331	0.109189	0.0794449
28.0182	HCNH	HCN	0.274077	0.184303	0.275317	0.0611323	0.273457	0.168689	0.473922	0.483239	0.458965	0.376861	0.16193	0.010207	0.752856		0.320032	0.028812	0.293936	0.174571	0.065213	0.0234553	0.0789586	0.00305613	0.0933881	0.0179078	0.076322	0.0167466	0.220006	0.143391	0.367582		0.144127		3.09337		1.53716		0.0137951	0.00752983	0.0171218
28.0308	C2H4	ethene (fragments on this mass subtracted)	0.563376	0.324198	0.70984	0.305085	0.569533	0.367267	0.934947	0.419584	0.290405	0.154538	0.210271	0.0277503	0.790763		0.960817	0.269481	0.668484	0.309335	0.190449	0.0477491	0.205854	0.0119122	0.195318	0.0219649	0.187217	0.0842653	0.401114	0.139111	1.56576		0.343044		0.556099		0.538181		0.229529	0.16368	0.142607
30.0338	CH3NH	Methanimine	0.000454952	0.000570016	0.000801287	0.00062549	0.000784388	0.00105006	0.00100922	0.001334	0.000526388	0.000911731	6.67251e-05	9.43636e-05	0.000312651		0.00146229	0.000683787	0.00223607	0.00222851	7.2064e-05	3.18575e-05	0.000151912	0.000109144	0.000678692	0.000667121	0.000143341	0.000187481	0.000656953	6.28983e-06	0.00184364		0.000846937		5.10421e-05		0.00510401		0.000101097	7.64614e-05	0
31.0178	CH2OH	Formaldehyde	1.8625	0.705624	1.9025	0.672056	2.56908	2.47358	1.73727	0.893685	1.53267	0.383396	1.17045	0.304339	2.61788		1.66327	0.0812925	1.50324	0.473104	0.611095	0.167187	0.634891	0.067179	0.692181	0.113055	0.516858	0.206733	0.838308	0.129713	4.75829		2.42006		1.42227		2.36484		1.56067	1.1706	0.332752
33.0335	CH4OH	Methanol	1.16068	0.477766	0.899115	0.351663	1.29878	1.37195	1.61455	0.978325	1.27392	0.792401	0.87385	0.100974	2.19548		0.812241	0.166039	0.950534	0.116692	0.436935	0.0676819	0.385297	0.0437285	0.379329	0.0630785	0.259864	0.0442746	0.668437	0.211931	3.57471		1.1266		2.44471		1.83998		0.953487	0.814777	0.201927
34.995	H3S	H2S	0.0136125	0.012256	0.0144789	0.00551031	0.0157356	0.0113007	0.0963858	0.141588	0.039901	0.0503378	0.0105866	0.000956929	0.0465126		0.0158705	0.00169477	0.0116068	0.00631643	0.00499851	0.00226019	0.00500318	0.000165392	0.00334694	0.000443409	0.0026672	0.00071655	0.0103932	0.00927751	0.038144		0.0192146		0.223136		0.20727		0.00102071	0.000636978	0.000200225
41.0386	C3H5	Propadiene, propyne (unknown)	0.0785484	0.0480652	0.0877922	0.0409506	0.074432	0.0440655	0.156471	0.110353	0.0908373	0.0603502	0.051514	0.011806	0.258364		0.0742091	0.00418733	0.100062	0.049667	0.0220445	0.00548789	0.026494	0.000453012	0.0311953	0.00731047	0.0170444	0.00250248	0.0759168	0.0361683	0.183315		0.103886		0.858136		0.688919		0.0158564	0.0112373	0.000922801
42.0338	C2H3NH	Acetonitrile	0.0763596	0.0530172	0.0860396	0.0275679	0.0608094	0.0519288	0.311441	0.470968	0.299926	0.323648	0.393315	0.0220235	0.833036		0.673266	0.147482	0.584127	0.28515	0.157714	0.043305	0.168518	0.0131147	0.12167	0.0245321	0.082666	0.0225251	0.260884	0.0940895	1.31254		0.517894		1.35542		1.35236		0.241224	0.17216	0.0582221
43.0542	C3H6H	propene (fragments on this mass subtracted)	0.525076	0.308014	0.608411	0.302393	0.474779	0.287865	1.06861	0.751052	0.607619	0.368909	0.188276	0.0139827	0.534843		0.757904	0.130847	1.3501	0.312355	0.263504	0.016467	0.270473	0.0296249	0.561868	0.0765676	0.410218	0.08028	0.605641	0.222965	1.22676		0.190326		0.50376		0.941583		0.0684846	0.029029	0.0954423
44.0131	HNCOH	Isocyanic acid	0.61921	0.436687	0.574074	0.239573	0.471298	0.282966	0.597922	0.287199	0.431549	0.103149	0.00186625	0.00128503	0.00679928		0.00711336	0.000524488	0.0141848	0.00758617	0.000703893	0.00011407	0.000933175	0.000134482	0.00136856	0.00107362	0.000667051	0.000624681	0.00474719	0.00231812	0.0212047		0.0126941		0.00454606		0.0360125		0.00145369	0.000847857	0.000547276
44.0495	C2H5NH	Etheneamine	0.00529475	0.004111	0.00598632	0.0027253	0.00560622	0.00473274	0.0111986	0.00866067	0.00941275	0.00662723	0.656401	0.0326233	1.97316		0.829664	0.168497	0.838188	0.301439	0.24349	0.0543729	0.269442	0.0290149	0.226858	0.0280905	0.155697	0.0259549	0.482523	0.186039	2.66762		1.74574		1.43888		2.69922		0.695116	0.492155	0.153762
45.0335	C2H4OH	Acetaldehyde	0.870414	0.387798	0.916067	0.318918	0.792717	0.507672	1.63103	1.19668	1.21581	0.824481	0.00652764	0.000258173	0.0238771		0.0099141	0.000317006	0.0117596	0.00634003	0.00201506	0.000625561	0.00238297	0.000368257	0.00294717	0.000553718	0.0020426	0.000622703	0.00836448	0.00521383	0.0259476		0.018634		0.0382441		0.0705395		0.00188193	0.00123311	0.00141268
46.0287	CH3NOH	Formamide	0.00906702	0.00576793	0.0115164	0.00422826	0.0095748	0.00554501	0.0307961	0.039775	0.02902	0.0310173	9.77286e-05	0.000138209	0.00104607		5.68733e-05	2.27727e-06	0.000193616	1.93532e-05	2.06846e-06	1.60602e-07	1.09923e-05	1.55455e-05	5.47008e-05	8.09608e-05	2.48073e-05	3.70123e-05	0.000105318	6.08352e-05	0.000974356		0.000538656		0.00102094		0.00706624		0.000117152	8.20734e-05	4.7934e-05
46.0651	C2H7NH	Ethylamine	0.000136431	0.000174493	0.000237348	0.000179282	0.000152987	0.000100823	0.000889073	0.00125935	0.000327039	0.000492811	0.103701	0.000739753	0.612633		0.239481	0.0378708	0.150041	0.0482119	0.108558	0.0411179	0.118672	0.0329561	0.0710064	0.00914267	0.0621587	0.0272215	0.173642	0.116295	1.08905		0.425189		0.333915		0.369921		0.136767	0.0955117	0.0740523
47.0128	CH2O2H	Formic acid	0.35104	0.1941	0.275747	0.143653	0.395838	0.286786	0.342311	0.203144	0.196646	0.064004	0.0204935	0.0192715	0.132716		0.0545752	0.00284033	0.0476744	0.0274522	0.00112274	0.00158779	0	0	0.0062065	0.01075	0.0140762	0.00824354	0.19661	0.214863	0.228032		0.0763644		0.295392		0.105208		0.039709	0.0300009	0.0124399
47.0491	C2H6OH	ethanol	0.0406702	0.0335856	0.0602438	0.0320982	0.0548599	0.0389197	0.188833	0.28114	0.0761831	0.0566818	0.227378	0.00772684	0.319611		0.734208	0.104503	0.486185	0.103654	0.377451	0.0483533	0.44633	0.142861	0.401073	0.0551265	0.324006	0.0248963	0.509575	0.197681	0.75852		0.232881		0.245577		0.607548		0.128892	0.0511074	0.160485
48.008	HNO2H	HONO	0.53627	0.232351	0.599752	0.20113	0.509608	0.317977	0.668946	0.262405	0.359348	0.115532	0.00880026	0.00101908	0.0436332		0.00895311	0.000104256	0.00890112	0.0039844	0.0025566	0.000954195	0.00263135	0.000195437	0.00152484	0.000351727	0.000940856	0.000225984	0.00734599	0.00694984	0.0344639		0.0204666		0.0687625		0.169626		0.00101257	0.000705314	0.00025064
49.0106	CH4SH	methane thiol	0.0103119	0.00996709	0.0114952	0.00596226	0.00958241	0.00628998	0.0685633	0.101983	0.0323296	0.0392018	0.000277823	9.2934e-05	0.00117272		0.000563325	0.000103143	0.000498815	0.000163762	0.000112969	3.02517e-05	0.000114035	2.44902e-05	0.000187372	9.88987e-06	0.00015812	3.47684e-05	0.000280856	5.38757e-05	0.00184261		0.00109509		0.000722524		0.000658503		0.000623009	0.000472154	0.000154969
49.0284	CH4O2H	Methanediol	0.000531727	0.000292921	0.000586721	0.000236525	0.000712763	0.000568746	0.000603	0.000360293	0.000242893	0.000267615	0.00026396	1.34372e-05	0.000716508		0.0023633	9.91862e-06	0.00221987	0.0010343	0.000447003	0.000171605	0.000582358	1.0986e-05	0.000689762	8.70618e-05	0.0005929	0.000166661	0.00159535	0.00117976	0.00245814		0.000308279		0.00147965		0.00307888		5.83756e-05	2.75603e-05	0.000100639
52.0182	C3HNH	Propiolonitrile (=propyne nitrile)	0.00149271	0.00125704	0.00143391	0.000758668	0.00164778	0.00159495	0.00149318	0.00135504	0.000811852	0.000298702	0.0304993	0.00234941	0.0659183		0.066118	0.0180794	0.0560283	0.0213499	0.0196529	0.00721584	0.0246037	0.00140975	0.0184528	0.00111572	0.0145775	0.00404873	0.0266211	0.0103211	0.134789		0.0542735		0.0294082		0.0707788		0.0290089	0.0194967	0.0124063
53.0386	C4H4H	1-Buten-3-yne (fragments on this mass subtracted)	0.0574891	0.0312593	0.0566548	0.0318491	0.062179	0.0395099	0.0726721	0.0573889	0.0324668	0.011718	0.00727245	0.00108227	0.0275228		0.0378709	0.00118213	0.0413366	0.0253125	0.00614621	0.00195842	0.00794702	0.000270166	0.00830509	0.00054512	0.00619808	0.00218242	0.0245447	0.0147469	0.0437578		0.0128134		0.0571132		0.0901082		0.00157103	0.00048896	0.00111295
54.0338	C3H3NH	acrylonitrile	0.0233681	0.0188077	0.0252501	0.0115676	0.0269168	0.0238843	0.0372423	0.0249476	0.0329551	0.024153	0.0220978	0.00289764	0.0735405		0.029531	0.00558541	0.0208033	0.00920305	0.00897273	0.00267789	0.0108041	0.00226618	0.00728256	0.00135898	0.00618015	0.00230886	0.0154914	0.00833562	0.0734562		0.0355814		0.0295284		0.046109		0.0161552	0.01294	0.00598778
55.0178	C3H2OH	2-propynal	0.0352087	0.015542	0.0344252	0.0138934	0.037848	0.018852	0.0400491	0.0219666	0.0250355	0.0101823	0.1832	0.0125687	0.374646		0.413445	0.0979747	0.294363	0.133437	0.0944189	0.0289031	0.103441	0.00745738	0.0723652	0.0106589	0.0534336	0.0170672	0.127987	0.0504796	0.621941		0.199766		0.41618		0.525541		0.101447	0.0684334	0.0331878
55.0542	C4H6H	1,3-butadiene (82%), 1,2-butadiene (1%), other fragments on this mass subtracted	0.29016	0.188421	0.340334	0.18418	0.293273	0.211943	0.540483	0.401568	0.260637	0.126424	0.00631914	0.000700347	0.0269939		0.0147752	0.00024455	0.0177692	0.0112663	0.00260747	0.000745801	0.00323691	0.000144655	0.00277634	0.000383208	0.00174083	0.000596103	0.00987246	0.00661053	0.0290144		0.010597		0.0482541		0.0815076		0.000980344	0.000411521	0.000327468
56.0495	C3H5NH	Propanenitrile	0.0110586	0.00982529	0.0120292	0.00512694	0.0119008	0.0105807	0.0485215	0.0671653	0.032128	0.0352418	0.479942	0.0180716	1.06606		0.966536	0.183081	0.897376	0.330952	0.278344	0.0698738	0.306598	0.0380155	0.285623	0.0377965	0.211713	0.0597415	0.493622	0.160676	2.49366		1.32324		0.360903		1.16697		0.674109	0.478821	0.158497
57.0335	C3H4OH	Acrolein	0.92679	0.426237	0.967629	0.495333	0.895081	0.45207	1.10903	0.684796	0.649369	0.192247	0.1708	0.00750667	0.396938		0.226762	0.0490787	0.185705	0.0760005	0.0466054	0.0134826	0.0495952	0.00651323	0.0373277	0.0079422	0.0253289	0.00670583	0.0807999	0.0355395	0.436565		0.150085		0.844909		0.608669		0.0652173	0.0456526	0.0173607
57.0699	C4H9	butenes (59%), general hydrocarbon (34%), other fragments on this mass subtracted	0.175101	0.1107	0.211356	0.0975464	0.164442	0.106709	0.468278	0.385487	0.280084	0.215093	0.00887126	0.000526907	0.0303786		0.0117495	0.000214794	0.0165787	0.00677378	0.00284831	0.000598024	0.00349146	0.000590201	0.00429276	0.000577458	0.00278592	0.000719748	0.00827086	0.00414116	0.0419411		0.0237914		0.0262444		0.0791688		0.0043324	0.00341648	0.00139865
58.0287	C2H3NOH	methyl isocyanate 50%, hydroxy acetonitrile 50% (estimate)	0.0122958	0.00760252	0.0138337	0.00482459	0.0125007	0.00738531	0.0272374	0.0277591	0.0230496	0.0199433	0.00147615	0.00015382	0.00443602		0.00167648	5.25594e-05	0.00418136	0.00177714	0.000614969	0.000106878	0.000691323	1.87159e-05	0.000700506	0.000163009	0.000360442	4.92836e-05	0.00161112	0.000843757	0.0118289		0.00648522		0.00341126		0.0321029		0.000411968	0.000236739	0.00017889
58.0651	C3H7NH	Propene amine	0.0024425	0.00202947	0.0022812	0.000992123	0.00207706	0.00128553	0.00875615	0.0106086	0.00694241	0.00663033	0.201619	0.136672	0.0368145		0.142271	0.0409648	0.319364	0.00650304	0.0764053	0.0287947	0.101102	0.066349	0.0718087	0.0504783	0.0866053	0.0466048	0.0932734	0.0523057	0.511163		0.0437064		0		0.0338781		0.260083	0.27333	0.0497578
59.0128	C2H2O2H	glyoxal	0.323084	0.198085	0.435912	0.231791	0.275612	0.224289	0.282946	0.200148	0.703703	0.373263	0.35455	0.0373105	1.02345		0.274852	0.0533945	0.378478	0.150017	0.119363	0.0175077	0.127578	0.00111669	0.0871806	0.0157433	0.0611173	0.0114975	0.198079	0.0623699	0.886128		0.531101		1.05197		0.969164		0.199868	0.154778	0.0484161
59.0491	C3H6OH	acetone (>99%), propanal (<1%)	0.35512	0.156225	0.338506	0.117061	0.369732	0.211527	0.788497	0.713586	0.511981	0.389417	0.0354118	0.00230984	0.152706		0.0235893	0.000128399	0.033343	0.0160797	0.00723243	0.00224004	0.00907227	0.0011978	0.00842098	0.0021394	0.00467131	0.00100001	0.0271348	0.018269	0.110921		0.103729		0.256071		0.899063		0.00746965	0.0059495	0.00454131
60.0444	C2H5NOH	acetamide	0.0326571	0.01906	0.0430519	0.0210918	0.0350788	0.0247687	0.273546	0.49017	0.224337	0.270489	0.00120138	0.000519126	0.00710911		0.0011605	0.000220782	0.00260844	0.000835658	0.000428952	0.000210011	0.000368095	3.45955e-05	0.000400775	0.000250854	0.000165155	8.52026e-05	0.00100738	0.000621571	0.0081251		0.00723887		0.00600886		0.0428961		0.000251084	0.000190669	0.000141042
60.0808	C3H9NH	trimethyl amine, other C3 amines	0.00203015	0.00194136	0.00215945	0.00156647	0.00228517	0.00141767	0.0142005	0.0227723	0.00538054	0.00409984	1.89093	0.053459	4.46495		1.87042	0.524731	2.25464	0.42829	0.94814	0.225828	1.04985	0.328324	0.884066	0.127748	0.646291	0.133317	1.82686	0.791364	14.6232		4.6898		3.44251		5.89429		2.43104	1.97232	0.603368
60.9743	COSH	unknown	0.000837499	0.00113788	0.00207276	0.00158962	0.000893954	0.0021407	0.00024488	0.000344927	0.00340226	0.00276205	0.0272461	0.00534622	0.0428736		0.0882985	0.0059983	0.0478085	0.0193159	0.0283287	0.00786604	0.032084	0.0134189	0.0231899	0.00354434	0.0195937	0.00748004	0.0462866	0.0240421	0.0824603		0.0255292		0.0191237		0.0677294		0.00380022	0.00190287	0.0103191
61.0284	C2H4O2H	acetic acid (67%), glycolaldehyde (33%) (estimate)	2.38931	0.955892	2.17148	0.888674	2.0933	0.935918	3.93132	2.6474	1.91987	0.940944	0.00129997	0.000224446	0.00484945		0.00107452	5.06388e-05	0.00119624	0.000432296	0.0005703	0.000135667	0.000686596	4.79706e-05	0.000307765	6.91117e-05	0.000267016	7.52224e-05	0.00092422	0.000680848	0.00502793		0.00175485		0.0200122		0.0202907		0.000212539	0.000110238	7.38803e-05
62.0237	CH3NO2H	nitromethane	0.0643672	0.0298806	0.0742651	0.0296613	0.0840443	0.0546517	0.0553628	0.041999	0.0399037	0.0301157	8.84263e-05	5.31178e-06	0.000230118		0.000705872	1.63097e-05	0.000588512	0.000399418	0.000123605	4.74192e-05	0.000160405	1.22562e-05	0.000143844	1.08933e-05	0.000113063	4.50175e-05	0.000383584	0.000283008	0.000746506		0.000125227		0.000201066		0.000881111		3.87386e-05	2.52127e-05	3.69291e-05
63.0263	C2H6SH	Dimethyl sulfide	0.0013449	0.00140497	0.00156906	0.000844395	0.00140223	0.00102813	0.00441981	0.00507359	0.00406495	0.00423276	0.014496	0.000967077	0.0299741		0.0448573	0.0125248	0.0289282	0.0182888	0.00939959	0.00372748	0.0117235	0.00201141	0.00611047	0.000475339	0.00497465	0.00165712	0.0116735	0.00546038	0.0562847		0.0153014		0.0232228		0.0412324		0.00796769	0.00519265	0.00380125
63.9852	HNOSH	unknown	2.56744e-05	2.37202e-05	2.19613e-05	2.02336e-05	3.11367e-05	2.76998e-05	6.7536e-05	6.42169e-05	3.63559e-05	5.32138e-05	0.0294638	0.00563221	0.078735		0.0627404	0.00154633	0.0821071	0.0448001	0.0143736	0.00441874	0.0178412	0.00064786	0.0152844	0.00235958	0.00907816	0.00264381	0.0596297	0.031711	0.137562		0.0716786		0.0781237		0.367512		0.00773039	0.0041138	0.00276842
66.0338	C4H3NH	3-butynenitrile, 2-butynenitrile, cyanoallene	0.000420201	0.000373341	0.000435619	0.000253936	0.000520793	0.000509413	0.000512864	0.000533179	0.000221229	0.000101334	0.00136265	0.000711809	0.0021319		0.00351463	0.000648419	0.00312338	0.00118547	0.00137501	0.000264268	0.00162668	0.000670524	0.00115078	0.000350806	0.00116895	0.00043793	0.00233709	0.00145821	0.00536171		0		0.00115272		0.000589788		0.000567321	0.000620561	0.0011786
67.0542	C5H6H	1,3-cyclopentadiene (22%), isoprene fragment subtracted (78%)	0.0357145	0.0307265	0.0362225	0.0255186	0.0417847	0.0393201	0.0564907	0.0493197	0.019111	0.00876299	0.374967	0.0656923	1.08467		0.197343	0.0320148	0.227385	0.0567788	0.104691	0.0258162	0.121034	0.0201463	0.0991275	0.0166654	0.0732837	0.0145682	0.153859	0.0406382	0.986607		0.665132		0.425953		0.672244		0.3426	0.25534	0.0668746
68.0495	C4H5NH	butenenitrile isomers (43%), pyrrole (57%)	0.055262	0.0510307	0.0539519	0.0293455	0.0522886	0.0496688	0.195559	0.240168	0.104624	0.101942	0.194304	0.00893406	0.282153		0.373112	0.121031	0.147593	0.0829226	0.0520945	0.0215058	0.0573389	0.00620673	0.0412188	0.00858411	0.0297773	0.00969595	0.0575337	0.0310207	0.367025		0.10396		0.440726		0.524147		0.0409036	0.0253372	0.0102744
68.9971	C3O2H	carbon suboxide	0.00343428	0.00147362	0.00424706	0.000966293	0.00358659	0.00241895	0.00319173	0.00195486	0.00294922	0.00213539	0.0062494	0.000607019	0.0222844		0.0105562	0.00063715	0.0213113	0.00806751	0.00229115	0.000713811	0.00280536	0.00016985	0.0030971	0.000550858	0.00154217	0.000284728	0.00902105	0.00559041	0.0319247		0.0142152		0.0357853		0.0934303		0.000893065	0.000311101	0.00015687
69.0335	C4H4OH	furan	0.403237	0.130927	0.355916	0.112224	0.435248	0.391527	0.437576	0.254378	0.407062	0.198579	0.00781705	0.00223651	0.0272959		0.00666347	0.000941273	0.00713419	0.00263118	0.00220135	0.000276157	0.00271751	0.00104796	0.00164009	0.000717115	0.00183825	0.000987014	0.00497114	0.00309962	0.0225609		0.00946015		0.00473729		0.0112484		0.00483404	0.00498123	0.00291821
69.0699	C5H8H	Isoprene (63%), other fragments on this mass subtracted	0.193958	0.172197	0.224375	0.109509	0.20323	0.165464	0.460702	0.387535	0.183026	0.125354	0.259699	0.0174466	0.608156		0.335999	0.0693874	0.458154	0.218026	0.104173	0.0228834	0.114618	0.010198	0.0876431	0.0135015	0.0632922	0.014919	0.158913	0.0451606	0.898046		0.575868		0.277262		0.659396		0.255182	0.191727	0.054995
70.0287	C3H3NOH	unknown	0.00190613	0.000665769	0.00226084	0.000757326	0.00207991	0.0010297	0.00463624	0.00559234	0.00483469	0.00434021	0.0240828	0.00370706	0.0600646		0.0272471	0.0064036	0.0269848	0.0156697	0.00345805	0.00136084	0.00354107	0.000462798	0.00330561	0.00159503	0.00232038	0.00129227	0.00944747	0.00472244	0.0636463		0.0273717		0.132052		0.087233		0.0113505	0.00891318	0.00206707
70.0413	C4H6O	unknown	0.00180208	0.000781789	0.00209879	0.000827616	0.00155885	0.000649851	0.00331261	0.00259022	0.00225148	0.00155907	0.000611542	8.2287e-06	0.00178805		0.000775293	0.0001228	0.00202869	0.00106604	0.000229723	3.22127e-05	0.000246249	4.57295e-05	0.000335409	6.37183e-05	0.000142762	3.30828e-05	0.000881165	0.000610541	0.0061342		0.00199283		0.00161846		0.017955		7.83118e-05	4.30987e-05	5.60719e-05
70.0651	C4H7NH	butanenitriles (61%), dihydropyrrole (39%)	0.0109268	0.00959935	0.0108633	0.00476931	0.00950654	0.00778592	0.0461849	0.0667025	0.0340619	0.0361509	0.206781	0.0144565	0.660449		0.254521	0.0635088	0.209293	0.0824349	0.0629549	0.0194042	0.0766519	0.0173761	0.057078	0.00943909	0.0470683	0.0147549	0.130155	0.0695507	0.866917		0.6745		0.140265		0.604891		0.241899	0.193042	0.052077
71.0128	C3H2O2H	Propiolic acid	0.00961752	0.00270633	0.0118878	0.00460542	0.0100089	0.00453008	0.0124151	0.00569902	0.0103255	0.00492812	0.101496	0.00598483	0.320596		0.0616465	0.0110231	0.0738324	0.0209436	0.0307425	0.00420756	0.0311077	0.00062747	0.0208567	0.00369414	0.0140297	0.00321643	0.0627935	0.0315068	0.252388		0.161569		0.359105		0.376273		0.0491369	0.0379836	0.0130633
71.0491	C4H6OH	MVK (48%), methacrolein (19%), crotonaldehyde (33%)	0.360484	0.153272	0.341134	0.147373	0.346317	0.174073	0.473393	0.276213	0.289691	0.128306	0.000564507	4.91724e-05	0.00139864		0.00201346	0.000288198	0.00158174	0.000773748	0.000633505	0.000152321	0.000830385	0.000382479	0.000700115	0.000141732	0.000507257	0.000185463	0.00124665	0.000520613	0.00316396		0.00171551		9.18247e-05		1.75002e-05		0.000662349	0.000508177	0.00027501
71.0855	C5H10H	pentenes+methylbutenes (69%), other fragments on this mass subtracted	0.0184347	0.0127035	0.0276885	0.00996586	0.0185435	0.0171846	0.0567844	0.0476778	0.0324481	0.0263009	0.402371	0.00598096	1.0346		0.463706	0.133043	0.508684	0.133126	0.178145	0.0382723	0.177212	0.0396472	0.133783	0.0185354	0.0987276	0.0193556	0.313503	0.148298	2.33018		1.6298		0.285076		1.2489		0.567911	0.439611	0.125569
72.0808	C4H9NH	butene amines (~50%), tetrahydropyrrole (~50%)	0.000982305	0.000748046	0.000966931	0.00027513	0.000643962	0.000397211	0.00390695	0.00550796	0.00320711	0.00295214	0.000370518	0.00010592	0.00165999		0.000403431	8.16089e-05	0.000467408	3.30925e-05	0.000197414	7.98386e-05	0.000228834	6.76812e-05	0.000201427	6.99441e-06	0.000171046	6.83263e-05	0.000412816	0.00033649	0.00170659		0.000786064		0.00106326		0.00281156		9.73806e-05	5.20149e-05	0.000217975
73.0284	C3H4O2H	methyl glyoxal (~50%), acrylic acid (~50%)	0.314025	0.106683	0.297505	0.0987318	0.313073	0.145532	0.396341	0.212559	0.284916	0.122933	3.5201e-05	3.74698e-06	0.000106162		7.23765e-05	9.04174e-06	8.73219e-05	2.24873e-05	2.04005e-05	1.03459e-06	1.81535e-05	3.27765e-06	2.02095e-05	4.41991e-06	2.7212e-05	1.5787e-05	3.89467e-05	1.64876e-05	0.00015863		8.07866e-05		0.000213666		0.000311403		2.11968e-05	1.58826e-05	2.15999e-05
73.0648	C4H8OH	MEK (85%), 2-methylpropanal (14%), butanal (1%)	0.0850278	0.0371423	0.0874694	0.0275909	0.0845775	0.0491716	0.252932	0.289363	0.156364	0.128978	0.132135	0.00942811	0.339546		0.626558	0.19677	0.493314	0.217577	0.138771	0.0472406	0.160258	0.0282834	0.174445	0.0326609	0.160206	0.0434208	0.232588	0.0898562	0.608162		0.0726161		0.718619		0.442543		0.0747164	0.0407439	0.0903844
74.0111	CH2N2O2	unknown	9.29744e-05	8.49675e-05	0.000235162	0.000211113	0.00014668	0.00012439	0.00329334	0.00693743	0.00289369	0.00405115	0.0148431	0.000294075	0.0835467		0.019402	0.000129134	0.0256628	0.0148211	0.00524074	0.00177284	0.0069776	0.000447406	0.0063556	0.00100103	0.00394946	0.00103142	0.0176237	0.00799631	0.0480444		0.0182911		0.107777		0.222341		0.00271194	0.00136399	0.000972216
74.0237	C2H3NO2H	nitroethene	0.001491	0.000631482	0.00174391	0.000780575	0.00162696	0.000925892	0.00147491	0.00120673	0.000756839	0.000530537	0.0810764	0.00366546	0.172097		0.106209	0.0186563	0.125871	0.0283104	0.049704	0.0106302	0.0502792	0.0101849	0.0446527	0.00579785	0.0302608	0.00555554	0.0791999	0.0225017	0.415871		0.262931		0.0374338		0.184414		0.12271	0.102896	0.0261838
74.0349	CH3N3OH	unknown	0.000966182	0.000456435	0.00120541	0.000922325	0.000861577	0.000704375	0.00346533	0.00492266	0.00231046	0.0021131	0.0128265	0.00114739	0.0366086		0.0138163	0.000466961	0.0177438	0.00815928	0.00374959	0.00107201	0.00461799	0.000139272	0.00383834	0.000732788	0.00219097	0.00053928	0.0186304	0.0103696	0.0417051		0.0203704		0.0336024		0.150611		0.00189551	0.0010526	0.000627616
74.06	C3H7NOH	unknown	0.00423931	0.00306595	0.00493765	0.00213737	0.00406373	0.00235097	0.0274707	0.0463363	0.0203328	0.024209	0.371082	0.0359636	1.03698		0.218291	0.0435381	0.246873	0.0695618	0.106222	0.0218259	0.110547	0.00684702	0.0724084	0.0127109	0.0525515	0.0106745	0.149528	0.0418052	0.809443		0.61546		0.541378		0.911547		0.222335	0.167713	0.049733
75.0441	C3H6O2H	hydroxyacetone (~50%), methyl acetate (35%), ethyl formate (14%)	0.577926	0.237268	0.485688	0.189062	0.481299	0.205048	0.967274	0.646042	0.515811	0.22794	0.00412073	0.000290708	0.0179941		0.00532974	0.000384721	0.00675764	0.00378353	0.00108366	0.00033088	0.00118658	6.85176e-05	0.00104764	0.000260447	0.000588977	0.000157134	0.00442967	0.00351586	0.016634		0.00777424		0.0251136		0.0560687		0.000388867	0.000143205	4.79906e-05
76.0393	C2H5NO2H	nitroethane	0.000690561	0.000287045	0.000834763	0.000192697	0.000773587	0.000332343	0.00110237	0.000729254	0.00124265	0.000813348	0.0130825	0.00126221	0.0350743		0.00765375	0.001192	0.00743206	0.00143179	0.00285023	8.28447e-05	0.00387296	0.000807403	0.00309821	0.000466543	0.0023021	0.000488952	0.00553326	0.00299821	0.0314857		0.0230826		0.0280438		0.03831		0.0145833	0.0140649	0.0025234
77.0022	C5HO	unknown	0.000140054	6.87326e-05	0.000175384	5.40832e-05	0.000171439	8.42544e-05	0.000320162	0.000255243	0.000258501	0.000227956	0.395618	0.035916	1.13596		0.222694	0.039293	0.203802	0.0721462	0.0908547	0.0280191	0.108195	0.0256618	0.0759938	0.0130272	0.0567831	0.0148647	0.150376	0.0683432	1.02028		0.847222		0.276706		0.812022		0.376435	0.295499	0.0702798
77.0233	C2H4O3H	unknown	0.000898565	0.000650535	0.000835157	0.000365229	0.00113094	0.00114458	0.000735185	0.000735391	0.000543362	0.000558245	0.121488	0.00222623	0.330477		0.115624	0.0266986	0.123574	0.0562368	0.0310411	0.00594711	0.0328015	0.0008179	0.0240851	0.00382549	0.0167555	0.00348069	0.0483143	0.0134696	0.291844		0.187457		0.15565		0.319384		0.077909	0.0602237	0.0176601
77.0597	C3H8O2H	unknown	0.00586707	0.00206756	0.00548789	0.00142399	0.00484826	0.00285001	0.0109703	0.00926526	0.00765414	0.00546368	0.338212	0.0123558	0.908414		0.350414	0.060314	0.381722	0.0993074	0.16171	0.0276051	0.164822	0.0345444	0.128267	0.0210088	0.0941061	0.0204719	0.24142	0.0714883	1.71789		1.44886		0.432023		1.14723		0.537772	0.455176	0.0907134
78.0008	CH3NOSH	n-sulfinylmethanamine	6.12246e-05	3.43594e-05	7.05377e-05	2.27032e-05	4.56874e-05	2.10353e-05	0.000120747	6.99449e-05	9.11065e-05	6.88054e-05	0.0365581	0.00382269	0.135121		0.0219786	0.00342175	0.0280613	0.0108071	0.00539309	0.00075903	0.00538693	0.00126902	0.0043011	0.00274823	0.00288338	0.00304709	0.0166366	0.00623981	0.114922		0.083303		0.170286		0.159406		0.026319	0.0233302	0.00477087
78.0338	C5H3NH	unknown	0.000805429	0.000593418	0.00090505	0.000413075	0.000968772	0.000815158	0.0011907	0.00060627	0.000657291	0.000288425	0.00883052	0.00159834	0.0252351		0.00832198	0.00110211	0.00561255	0.00322721	0.00218656	0.000896969	0.00240932	0.000836961	0.00096576	0.000403719	0.00124901	0.000932888	0.00471134	0.00341282	0.0259409		0.0121565		0.000351493		0.00997428		0.00834695	0.00624583	0.00366699
78.0913	C3H11NOH	unknown	0.000116623	0.000107446	0.000182192	0.000145652	0.000181885	0.000242825	0.000283749	0.000252146	0.000100751	5.94076e-05	0.0776361	0.00964659	0.284769		0.0437462	0.00997274	0.0726178	0.0101926	0.0322484	0.00574844	0.031138	0.00695385	0.0243369	0.00370918	0.017349	0.00414962	0.043684	0.0126818	0.267055		0.223551		0.0968021		0.22926		0.0660553	0.0556908	0.017253
79.0542	C6H6H	benzene (90%) (fragments on this mass subtracted)	0.394901	0.297787	0.421138	0.251121	0.431122	0.396467	0.666333	0.423579	0.268776	0.129206	0.00027204	1.84385e-05	0.00103578		0.000239053	4.41429e-05	0.00039458	0.000119668	0.000104175	2.29917e-05	0.000112003	2.02192e-05	0.000105647	7.17163e-06	7.25379e-05	1.21646e-05	0.000225127	0.000144014	0.00140714		0.000872367		0.000748124		0.00656656		0.000125088	8.22136e-05	8.58946e-05
80.0131	C4HONH	unknown	0.000332586	0.000228152	0.000432432	0.000191274	0.000287102	0.000163697	0.000455991	0.000237221	0.000775613	0.00061004	0.000666597	7.79401e-06	0.00191444		0.00269849	7.5841e-05	0.00175006	0.00118811	0.000521187	0.000272492	0.000764443	0.000118214	0.000304656	2.87599e-05	0.000301068	0.000152865	0.0015075	0.0012156	0.00304623		0.000605302		0.00220187		0.00538211		0.000210796	0.000155037	0.000180685
80.0403	CH8N2S	unknown	0.00292356	0.00235919	0.00348113	0.00144106	0.00272594	0.00160768	0.00990174	0.0142503	0.00796638	0.00792666	0.184758	0.0192317	0.355525		0.323851	0.0811333	0.223222	0.12145	0.060288	0.0187803	0.0679828	0.0124103	0.0478594	0.00398166	0.0373648	0.0123209	0.0969931	0.0444208	0.361018		0.0815386		0.501731		0.562015		0.0406001	0.0256135	0.0260194
80.0495	C5H5NH	pyridine(44%), nitriles (56%)	0.019479	0.0142824	0.0211227	0.00763581	0.0212895	0.0161387	0.0747003	0.0998361	0.0679286	0.0722614	0.0029723	0.000518034	0.0157259		0.0011994	0.000133221	0.00143744	0.000778062	0.000377592	0.000100265	0.000480784	2.01863e-05	0.000401443	7.23354e-05	0.000308123	7.98354e-05	0.00104512	0.000495305	0.00354885		0.00306474		0.0171074		0.0153821		0.000584685	0.000350404	0.00021733
81.0335	C5H4OH	2,4-Cyclopentadiene-1-one (42%), other HCO2 (58%)	0.177672	0.0987671	0.134286	0.0754729	0.137897	0.0706055	0.171955	0.116119	0.105999	0.0352701	0.0123293	0.000371971	0.0338743		0.0118449	0.000295373	0.016599	0.00929471	0.00363548	0.0010207	0.00465209	0.000345642	0.00381164	0.000749244	0.00184192	0.000232553	0.0100624	0.00408053	0.0349282		0.0133655		0.059042		0.126589		0.00135155	0.000515798	0.000411363
81.0699	C6H8H	unknown	0.0464056	0.049293	0.0399085	0.0284565	0.0641519	0.0586435	0.127529	0.129354	0.0218215	0.00763016	0.00190227	0.000290188	0.0068063		0.00115997	0.000417157	0.00200114	0.00058662	0.000427193	1.62501e-05	0.000491699	0.000203508	0.000294776	9.94508e-05	0.000292605	0.000116838	0.00112199	0.000439093	0.00605939		0.00264094		0.00346795		0.00453612		0.00143174	0.00142345	0.000490958
82.0287	C4H3NOH	unknown	0.00147897	0.000628092	0.0015412	0.00039472	0.00144501	0.000670755	0.00124832	0.000759473	0.00147135	0.000583719	0.36232	0.0184591	0.939386		0.436227	0.101601	0.453181	0.221035	0.16303	0.0504549	0.192903	0.00685837	0.113891	0.0107348	0.0847044	0.0214342	0.323396	0.180066	1.0378		0.423335		1.56222		1.00566		0.249589	0.201435	0.0867041
82.0413	C5H5OH	unknown	0.00432341	0.00196075	0.00523673	0.00233206	0.00433105	0.00213718	0.0127058	0.0153741	0.00885909	0.00752344	0.00773529	0.000474608	0.0234089		0.00531662	0.000283516	0.00664405	0.00341885	0.00304051	0.00127368	0.00439119	0.00022008	0.00468774	0.000830482	0.00194375	0.000330857	0.00471002	0.002492	0.0249717		0.00983989		0.0297741		0.128654		0.00152963	0.000920768	0.000950115
82.0651	C5H7NH	methylpyrrole (33%), pentenenitriles (97%)	0.0149856	0.0130563	0.0153107	0.00703341	0.0133095	0.0103464	0.0694022	0.0983456	0.0431316	0.0453664	0.00807524	0.000712164	0.0229554		0.00650223	0.000316246	0.00846136	0.00388973	0.00152784	0.000339611	0.00189005	4.6113e-05	0.00138704	0.000307929	0.000775142	0.000207297	0.00675848	0.00385352	0.0249348		0.0108627		0.0157253		0.0989943		0.00074004	0.000420091	0.000208335
83.0128	C4H2O2H	unknown	0.00250064	0.00138316	0.00371305	0.00263527	0.00230038	0.00155109	0.00219324	0.00149111	0.0041925	0.00215446	0.646398	0.116442	3.08665		0.262942	0.0469658	0.356	0.0720519	0.15654	0.0449724	0.181952	0.0454896	0.106266	0.0201962	0.0812066	0.018542	0.226386	0.0659814	1.67543		0.948121		1.69173		1.07026		0.371411	0.313172	0.153947
83.0491	C5H6OH	2-methyl furan (51%), 3-methylfuran (10%), general HCO (37%)	0.35717	0.14409	0.322711	0.110823	0.345938	0.210368	0.607801	0.489139	0.45339	0.285176	0.222593	0.011674	0.640328		0.156862	0.0300407	0.201432	0.077957	0.0639415	0.00823716	0.0644384	0.00277489	0.0424246	0.00706215	0.0292138	0.00862477	0.0958319	0.0223825	0.629477		0.401146		0.337666		0.680844		0.149953	0.121562	0.0285508
83.0855	C6H10H	unknown	0.0584623	0.0401086	0.0804462	0.0353464	0.059512	0.0473414	0.172841	0.142285	0.0861269	0.0677676	0.00151976	0.000262503	0.00722241		0.00217908	0.000189827	0.00254306	0.00135653	0.000376895	0.000124113	0.000396183	4.36179e-05	0.000376563	8.89757e-05	0.000222548	6.40115e-05	0.00185959	0.00157762	0.00727092		0.00330847		0.00988769		0.0255685		0.000141421	3.9198e-05	8.5748e-05
84.0444	C4H5NOH	unknown	0.00690846	0.00593242	0.0076413	0.0041534	0.00722989	0.00458068	0.0202899	0.0211423	0.0175891	0.0171703	0.0241281	0.00340963	0.0817233		0.0130321	0.00342299	0.0121007	0.003064	0.00450948	0.000407337	0.0051373	0.000344524	0.00396979	0.000483435	0.0029332	0.000764156	0.00846702	0.00369499	0.0705337		0.060322		0.028435		0.0657259		0.0227551	0.0191494	0.00391986
84.0808	C5H9NH	Pentanenitriles	0.00501625	0.00448492	0.00613316	0.00243154	0.00471815	0.00323622	0.0300532	0.0477096	0.0223149	0.025176	0.451446	0.0332114	1.18167		0.240601	0.0489814	0.234122	0.0750436	0.0984416	0.023975	0.111999	0.0268474	0.0838442	0.0148918	0.0608715	0.0130181	0.157299	0.0571217	1.2542		0.974589		0.262677		0.903082		0.419546	0.320208	0.067077
85.0106	C4H4SH	thiofuran (=thiophene)	0.0120724	0.0072885	0.014473	0.0086011	0.015739	0.0122036	0.021063	0.0167405	0.0171078	0.0103897	0.017784	0.0076257	0.0627859		0.0224867	0.00419445	0.0207533	0.0101394	0.0045365	0.000537384	0.00423613	0.000425799	0.00389175	0.00131796	0.00266038	0.00126067	0.00928122	0.00286123	0.0704948		0.0433064		0.0517765		0.0665855		0.0190763	0.0172531	0.00286803
85.0284	C4H4O2H	2-(3H)-furanone, other fragments on this mass subtracted	0.446223	0.173321	0.401434	0.154773	0.491645	0.449954	0.518926	0.33157	0.387377	0.181387	0.0452152	0.0104676	0.17018		0.0199308	0.00322246	0.0118135	0.0055044	0.00714675	0.00248476	0.00880277	0.00256223	0.00566775	0.00129863	0.00520985	0.00237976	0.014196	0.00871847	0.081464		0.0523283		0.0891292		0.0627016		0.0243879	0.0208988	0.00787098
85.0648	C5H8OH	3-methyl-3-butene-2-one (37%), cyclopentanone (18%), HCO1 (45%)	0.120435	0.0522679	0.119799	0.0399943	0.122051	0.0589114	0.237422	0.177161	0.139476	0.0840404	0.150969	0.0119442	0.371371		0.0934306	0.0193945	0.0998199	0.0266161	0.044686	0.00884607	0.0472985	0.00920508	0.0367511	0.00620701	0.0258091	0.00562442	0.0629362	0.0161074	0.419362		0.316089		0.153808		0.271894		0.13351	0.107189	0.0261504
85.1012	C6H12H	unknown	0.0172568	0.0105476	0.0251758	0.0111896	0.0172166	0.012998	0.0538303	0.0496285	0.0301917	0.0251017	0.00421525	0.00231985	0.0189146		0.00355039	0.000713313	0.00265535	0.00113527	0.000253608	5.00288e-05	0.000153888	0.000103447	0.000353523	0.000516597	0.000316422	0.000396445	0.0020395	0.00104422	0.015008		0.00818166		0.0192901		0.0140967		0.0031575	0.00285549	0.000650499
86.0237	C3H3NO2H	unknown	0.00157426	0.000769564	0.0020647	0.000827867	0.00152301	0.000578246	0.00443348	0.00418152	0.0032451	0.00293716	0.0745673	0.00349617	0.187695		0.0644001	0.0158271	0.0622806	0.0197841	0.0217222	0.00658615	0.0259053	0.00774229	0.0196729	0.00397893	0.0151646	0.00384564	0.0439826	0.0245549	0.394674		0.245418		0.0163823		0.239097		0.114443	0.095574	0.0193987
86.0964	C5H11NH	unknown	0.00066358	0.000442951	0.000716674	0.00027127	0.000463772	0.000233185	0.00339293	0.0054616	0.00242201	0.00211497	0.00152014	3.18918e-05	0.00188776		0.0215436	0.0076504	0.0203026	0.00567573	0.00513396	0.00276074	0.00674336	0.00253223	0.0107357	0.00373348	0.0101295	0.00245704	0.0125706	0.00980121	0.0110464		1.11809e-05		0.00758964		0.00760012		0.000563376	9.49794e-05	0.00367387
87.0077	C3H2O3H	unknown	0.00466031	0.00197807	0.00568676	0.00268311	0.00456828	0.00383344	0.00755043	0.00660692	0.00689174	0.00485496	0.0130386	0.00171004	0.040211		0.0202779	0.0003673	0.022989	0.0109406	0.00713659	0.00205269	0.0091043	0.000324207	0.0089073	0.000497492	0.00698603	0.00167856	0.0205068	0.00986254	0.0262628		0.0135334		0.110333		0.0921197		0.0031883	0.000947714	0.00163279
87.0441	C4H6O2H	2,3-butanedione (87%), methyl acrylate (5%), other (8%)	0.49423	0.205337	0.416198	0.171343	0.418034	0.19903	0.694498	0.457327	0.439295	0.205358	0.0430723	0.00308186	0.0668984		0.123125	0.0318442	0.0850152	0.052555	0.0234013	0.00931325	0.0275661	0.00507275	0.0185565	0.001206	0.0156016	0.00582969	0.114146	0.0925571	0.12844		0.0167241		0.102074		0.132621		0.00943554	0.00517106	0.0100644
87.0804	C5H10OH	3-methyl-2-butanone (43%), 2-methylbutanal+3-methylbutanal (4%), 2-pentanone (32%), 3-pentanone (21%)	0.026944	0.0158116	0.0328163	0.0128291	0.0277038	0.016347	0.105618	0.137023	0.0567185	0.0486849	0.00141431	0.000106989	0.00272349		0.00394613	0.000280724	0.00382531	0.00223362	0.000810429	0.000328292	0.00107518	0.000182374	0.000838201	4.38408e-05	0.000444438	0.00010954	0.0013906	0.00052242	0.00561829		0.00129811		0.00494585		0.0161125		0.000263848	0.000120957	0.000130087
87.1168	C6H14H	unknown	0.00453164	0.00360528	0.00434282	0.00294931	0.00396671	0.00295764	0.0109177	0.0112019	0.00180424	0.000790452	0.0432416	0.00484714	0.102675		0.0946675	0.0192737	0.0841476	0.0411091	0.0239756	0.00609399	0.0255156	0.00201158	0.023976	0.0021759	0.0191274	0.00572127	0.0878069	0.0606243	0.136666		0.0391975		0.0591356		0.103776		0.0202089	0.0140955	0.011121
88.0393	C3H6NO2	unknown	0.000843351	0.000304898	0.00120818	0.000278877	0.00102036	0.000422415	0.00196347	0.00182002	0.00189801	0.00157307	0.126286	0.0202231	0.196617		0.22008	0.0579371	0.101212	0.060416	0.0283042	0.00881182	0.0315511	0.00626725	0.0202214	0.00392549	0.0143952	0.00459585	0.0349514	0.0146872	0.202506		0.0445138		0.348883		0.275963		0.0191986	0.0112672	0.00974289
88.0757	C4H9NOH	unknown	0.00167062	0.00138037	0.00198215	0.000888389	0.00143789	0.000765332	0.0118641	0.0202954	0.00932058	0.0111071	0.0036686	0.000200292	0.0161849		0.00488793	0.000194932	0.00503197	0.00288126	0.00109164	0.000269705	0.00129563	0.000107903	0.00131236	0.000292315	0.000884259	0.000283151	0.00404794	0.00198031	0.0128734		0.00631842		0.0128212		0.0218263		0.00149677	0.00123132	0.000626481
89.0233	C3H4O3H	pyruvic acid	0.0126233	0.00637866	0.0119706	0.00472443	0.0142458	0.00916453	0.0113271	0.0048917	0.00811269	0.00358783	0.00521138	0.000276185	0.00952821		0.00347206	0.000196128	0.00715272	0.00417127	0.00135689	0.000434547	0.00173681	0.000281087	0.00134687	0.000308541	0.00053896	3.92917e-05	0.00311923	0.00137644	0.0131889		0.00490556		0.0213236		0.0705275		0.000221427	5.66002e-05	0.000100412
89.0597	C4H8O2H	Methyl propanoate	0.0772383	0.0279343	0.0729888	0.0225139	0.0631416	0.0352848	0.128228	0.100232	0.0954603	0.0574345	0.0779177	0.0146122	0.21264		0.0426526	0.00276827	0.0872177	0.0323866	0.165069	0.0471078	0.196446	0.0751055	0.0580753	0.0102333	0.0522781	0.0123366	0.0330842	0.0114822	0.18177		0.0643935		0.0489655		0.0713603		0.0339522	0.0135269	0.011251
90.0186	C2H3NO3H	unknown	0.00160602	0.00103768	0.00255751	0.000694558	0.00170704	0.00121728	0.00246934	0.00151713	0.00139645	0.000424855	0.466487	0.0197756	1.34236		0.34833	0.078713	0.316065	0.137476	0.103656	0.0124939	0.10629	0.0144935	0.0787401	0.0107944	0.0519459	0.0116051	0.252855	0.101506	1.08696		0.405704		0.841179		1.1172		0.204472	0.152585	0.071365
90.055	C3H7NO2H	nitropropanes	0.000363987	0.00017133	0.000369313	0.000109355	0.000363226	0.00014193	0.00107501	0.00127931	0.00113271	0.00109248	0.00363629	0.000165799	0.0132879		0.00239771	7.80979e-05	0.00312256	0.00117754	0.000678821	0.000140727	0.000818321	4.93026e-05	0.000642574	0.000114346	0.000393722	0.000115637	0.00222023	0.00136079	0.0116389		0.00480237		0.0109429		0.0451072		0.00053424	0.000396047	0.000155403
90.0913	C4H11NOH	unknown	0.000300524	0.000324426	0.000300715	0.000188761	0.000240705	0.000207387	0.000623007	0.000601521	0.000338222	0.000239279	0.917609	0.127172	3.03886		0.319857	0.0511938	0.373601	0.130002	0.465299	0.263425	0.599922	0.0327952	0.131482	0.0242717	0.0969348	0.0244832	0.213583	0.0946327	1.37948		0.811153		0.924855		1.25403		0.315077	0.230402	0.0900495
91.0026	C2H2O4H	unknown	0.000134447	9.18339e-05	0.00019859	6.03971e-05	0.000114084	6.92458e-05	0.000437377	0.000422896	0.000281588	0.000220188	0.091453	0.00839342	0.22088		0.067092	0.014137	0.0819641	0.0347058	0.0199717	0.0030452	0.0170925	0.00237778	0.0163089	0.00282442	0.0110993	0.0046542	0.0368267	0.00699095	0.280406		0.176063		0.163444		0.305678		0.0531271	0.041601	0.00987525
91.039	C3H6O3H	unknown	0.016648	0.00551127	0.0156279	0.00493507	0.0184672	0.0100146	0.0234286	0.0130429	0.0157687	0.00696161	0.00407463	0.000393157	0.0185209		0.00469531	0.000182172	0.00416817	0.00210061	0.000679839	8.49531e-05	0.00081499	0.00040686	0.00139084	0.00035402	0.000940571	0.000303947	0.00387097	0.00253372	0.013566		0.0093786		0.0209715		0.0392829		0.00135255	0.00116634	0.000578229
91.0542	C7H6H	unknown	0.0239256	0.0219352	0.0315009	0.0213717	0.0301071	0.029905	0.0730714	0.0660606	0.0350811	0.0285504	0.13211	0.031714	0.447945		0.0501577	0.0111886	0.0325297	0.0148559	0.0183824	0.00741307	0.0242443	0.00718574	0.0142761	0.0037826	0.0114337	0.00474518	0.0364869	0.0259575	0.196694		0.159738		0.14023		0.230028		0.0593967	0.0460074	0.0133248
92.0495	C6H6N	ethynylpyrrole	0.00172829	0.0015214	0.00177502	0.00088494	0.00239435	0.00237436	0.00316061	0.0023805	0.0013535	0.00082507	0.236055	0.0194893	0.602098		0.111843	0.0209439	0.131533	0.0343061	0.0550982	0.0106532	0.0578415	0.0103529	0.0404788	0.00678698	0.0294866	0.0069272	0.0714725	0.0205387	0.631619		0.464306		0.116811		0.549792		0.17342	0.134786	0.0311503
92.107	C4H13NOH	unknown	0.000123061	0.000108135	0.000180446	0.00011025	0.000199522	0.000244313	0.000441063	0.000510659	0.00012704	8.21092e-05	0.0111422	0.00403632	0.043984		0.0101161	0.00204318	0.00848289	0.00542278	0.00158741	0.000519662	0.0015541	7.72638e-05	0.00140686	0.000681924	0.00102851	0.000407302	0.00463143	0.00265109	0.0331978		0.0191573		0.0330279		0.0342838		0.0063679	0.00538792	0.00111675
93.0335	C6H4OH	unknown	0.00369547	0.00242516	0.00339052	0.0020852	0.00593017	0.00771769	0.00508641	0.00579891	0.00771985	0.0073742	0.000913071	0.000265652	0.00564823		0.000795008	0.000121656	0.000696769	0.000344804	0.000315123	8.68297e-05	0.000417562	0.000202496	0.000263014	0.000131204	0.000216634	9.18813e-05	0.000662217	0.000461801	0.00436428		0.00196414		0.000976242		0.00167624		0.00091712	0.000882675	0.00033589
93.0546	C3H8O3H	unknown	0.0133261	0.0091625	0.0140852	0.00654738	0.0153913	0.0102186	0.0356445	0.0334968	0.0225206	0.0199923	0.216018	0.0242505	0.776103		0.0982966	0.0208428	0.0901967	0.0250741	0.043474	0.0177485	0.0557672	0.0164708	0.0360712	0.0077769	0.0284888	0.00948952	0.0758283	0.0439503	0.775085		0.468769		0.0737825		0.690431		0.179005	0.141367	0.0370923
93.0699	C7H8H	toluene	0.232189	0.189042	0.246648	0.12916	0.266217	0.218346	0.582833	0.442099	0.259686	0.198381	0.0329139	0.000854603	0.0903153		0.0262514	0.00629675	0.0246088	0.0107726	0.00779436	0.00165717	0.00731927	0.000112985	0.00599671	0.00100246	0.00423305	0.00134328	0.0122525	0.00508485	0.0935127		0.0543649		0.0508618		0.0718778		0.0189964	0.0165419	0.00430242
94.0287	C5H3NOH	2-furan carbonitrile (30%), 3-furan carbonitrile (70%)	0.00199987	0.00111967	0.00258278	0.00104729	0.00241103	0.00211537	0.00479691	0.00655151	0.00781619	0.00740662	0.01018	0.00250677	0.0458881		0.00562828	0.00114484	0.00494659	0.0014325	0.00122188	0.000430117	0.00150312	0.00045345	0.00135623	0.000351161	0.000965773	0.000283638	0.00402914	0.00233354	0.0429083		0.0234176		0.0151663		0.0363833		0.00989046	0.00829933	0.00182473
94.0499	C2H7NO3H	unknown	0.00221257	0.00209565	0.00223553	0.00133666	0.00155178	0.000970305	0.00988508	0.0162742	0.00476046	0.00500303	0.106344	0.00098895	0.196187		0.0674557	0.0117036	0.0760683	0.0135459	0.0439023	0.00902359	0.0456124	0.013258	0.0363616	0.00675317	0.0258369	0.00615798	0.0548628	0.0116815	0.579182		0.587693		0.012694		0.289308		0.229093	0.212626	0.0296636
94.0651	C6H7NH	2-methyl pyridine (93%), 3-methylpyridine (7%)	0.0145473	0.0130806	0.0138826	0.00733013	0.0148909	0.0128123	0.0633266	0.0886298	0.0443244	0.0479036	0.00803648	0.00191826	0.0169991		0.0535308	0.0155038	0.029831	0.0251519	0.01081	0.00662397	0.0147388	0.00523652	0.00652302	0.0014224	0.00758589	0.002658	0.0144444	0.0117797	0.0383522		0.00191598		0.0377136		0.0293251		0.0016588	0.00109248	0.00341163
94.9984	C2H6S2H	dimethyl disulfide	0.0021517	0.000831912	0.00238408	0.000897537	0.00176993	0.00142382	0.00439714	0.00428666	0.00235572	0.00145386	0.0160713	0.00122803	0.0742992		0.00298076	3.88814e-06	0.00688069	0.000832016	0.000330854	6.10451e-05	7.91662e-05	4.48423e-05	0.000575411	0.000816653	0.000360967	0.000461773	0.00237577	0.00121959	0.021895		0.0080005		0.0366628		0.0501744		0.0111859	0.0121877	0.00155793
95.0128	C5H2O2H	unknown	0.00327514	0.00228777	0.00327685	0.0020582	0.00440551	0.00698769	0.00484807	0.00539784	0.00620741	0.00442862	0.00148099	3.15636e-05	0.00552258		0.00219744	8.74427e-05	0.00233911	0.00114706	0.000713828	0.000125297	0.000851416	6.83185e-05	0.000746621	9.07823e-05	0.000562952	0.000162807	0.00370825	0.00271072	0.00703587		0.00424396		0.00565572		0.00974584		0.000414043	0.000161501	0.000323562
95.0491	C6H6OH	phenol (100%), vinyl furan	0.664071	0.53004	0.573299	0.364784	0.650312	0.520072	0.921234	0.632629	0.47771	0.285011	0.00419297	0.000578595	0.0112408		0.0117981	0.000142238	0.012082	0.00787185	0.00230127	0.00107336	0.00301402	0.000338489	0.0022189	0.000188623	0.00140119	0.000483124	0.00684263	0.00519249	0.0205138		0.00387432		0.0185699		0.0617642		8.13324e-05	4.68289e-05	0.000166303
95.0855	C7H10H	unknown	0.084893	0.0724466	0.0956096	0.0524437	0.120741	0.112018	0.23217	0.207928	0.0753044	0.0458086	0.0207676	0.0013462	0.048433		0.0380171	0.00813037	0.0383432	0.017666	0.0108491	0.00241748	0.0118285	0.000618944	0.0111277	0.000808957	0.00861715	0.00236371	0.111077	0.0855619	0.0685844		0.0292016		0.0577797		0.0718342		0.0137017	0.00968994	0.00684867
96.0206	C5H3O2H	unknown	0.00879745	0.00338077	0.0090044	0.00414859	0.00972914	0.0106345	0.0107836	0.00839271	0.00904318	0.00553147	0.0368657	0.00488443	0.0484475		0.0788823	0.0225199	0.0377101	0.025788	0.0100097	0.00396942	0.0120263	0.00272489	0.00663928	0.00144451	0.00459348	0.00164223	0.0127785	0.00606129	0.0666957		0.0107966		0.0960042		0.0753602		0.00517061	0.00276735	0.00357635
96.0444	C5H5NOH	4-Pyridinol, pyridine oxide	0.0108059	0.00915001	0.00989726	0.00539561	0.0103958	0.00582995	0.0274043	0.03058	0.0262562	0.0241818	0.000919958	2.78183e-05	0.00172657		0.00188116	0.000232838	0.00187355	0.00106467	0.00032102	8.44902e-05	0.000402703	0.000104975	0.000345541	5.83992e-05	0.000140028	1.58206e-05	0.000626904	0.000273009	0.00140048		0.000363186		0.00298921		0.0136413		9.14428e-05	2.03441e-05	6.32532e-05
96.0808	C6H9NH	2,5-dimethyl pyrrole (70%), ethylpyrrole (25%), other C2-pyrroles (5%)	0.0068347	0.00617719	0.00758848	0.00332503	0.00589535	0.00447054	0.041041	0.062125	0.0246503	0.0255653	0.0855729	0.000164406	0.144565		0.0884753	0.0173192	0.0590915	0.032552	0.0266745	0.00995916	0.0318514	0.000791747	0.0173947	0.00248197	0.0129939	0.00464322	0.088175	0.0642376	0.443694		0.254898		0.103436		0.411465		0.0309068	0.0255863	0.00886021
97.0284	C5H4O2H	2-furfural (88%), 3-furfural (4%), other HCO2 (12%)	0.639491	0.224127	0.541432	0.170167	0.820609	0.985498	0.66681	0.41113	0.571131	0.31524	0.0669483	0.0120222	0.0978962		0.112975	0.0311263	0.0364132	0.0230048	0.00951461	0.00308055	0.0102921	0.00229364	0.00647269	0.00156945	0.00412746	0.00121003	0.00763144	0.00236873	0.0634871		0.0076355		0.188079		0.103784		0.00531865	0.00250083	0.00293983
97.0648	C6H8OH	2,5-dimethyl furan (44%), 2-ethylfuran (10%), other C2-furans (46%)	0.207549	0.0945996	0.19719	0.0746576	0.189625	0.0893182	0.452082	0.387442	0.271502	0.175799	0.0426944	0.00675077	0.0992694		0.0391521	0.00466404	0.0419617	0.0165076	0.019528	0.00548208	0.0223925	0.00365294	0.0162428	0.00288205	0.0119817	0.00399115	0.0503101	0.0308941	0.123691		0.0632318		0.280801		0.0842323		0.0343017	0.0299166	0.010522
97.1012	C7H12H	unknown	0.0517913	0.0270531	0.0643469	0.0296437	0.0528105	0.0312068	0.120553	0.0990603	0.0676607	0.0530557	0.140538	0.0112737	0.370125		0.0812373	0.0203414	0.0793151	0.0311763	0.0300547	0.00235102	0.0304365	0.00242039	0.0190897	0.00296849	0.013153	0.00297892	0.0536712	0.0152894	0.327335		0.160239		0.232141		0.454183		0.0576463	0.0427592	0.0177281
98.0237	C4H3NO2H	unknown	0.00746041	0.0050195	0.00958305	0.0032451	0.00816701	0.00458314	0.0134947	0.0113029	0.0157405	0.0141036	0.00541221	0.000367854	0.0337172		0.00480028	2.01965e-05	0.00392915	0.00181152	0.00112085	0.000289268	0.00131801	0.000261816	0.00130107	0.000460687	0.00120207	0.000532332	0.00327136	0.0017244	0.0143117		0.00793077		0.012494		0.0169701		0.00260292	0.00240117	0.00210039
98.06	C5H7NOH	unknown	0.00420885	0.00451104	0.00496325	0.00262028	0.00373812	0.00346223	0.0219281	0.0301077	0.0172532	0.0194647	0.0742333	0.0211596	0.174206		0.0349952	0.0021605	0.0338141	0.0117048	0.0283349	0.0085004	0.0356609	0.0160888	0.0097759	0.00252204	0.00966389	0.00380991	0.0212976	0.00830279	0.122128		0.0787681		0.0388264		0.0466768		0.0392319	0.0312627	0.0157926
98.0964	C6H11NH	4-methylpentanenitrile	0.00206977	0.00211163	0.00238027	0.00096209	0.00183196	0.00155222	0.0135493	0.021722	0.0089034	0.0100641	0.603171	0.0789031	1.91558		0.194488	0.029642	0.193459	0.020652	0.0826009	0.0168957	0.0920309	0.00896139	0.057141	0.0101391	0.0415474	0.00926646	0.0883348	0.0325268	0.828577		0.520687		0.47154		0.799163		0.215262	0.173298	0.053157
99.0011	C3H2N2SH	unknown	0.0109871	0.00411872	0.0121699	0.00488819	0.011791	0.00619211	0.0125562	0.00608187	0.0109524	0.00659239	0.000173703	3.3259e-05	0.00104897		0.000147948	1.28589e-05	0.000216865	9.81565e-05	4.6982e-05	5.72019e-06	4.73052e-05	7.95049e-06	4.6496e-05	5.73427e-06	3.28133e-05	7.65544e-06	0.000145706	0.000114342	0.000689175		0.000369663		0.00394615		0.0072216		2.97469e-05	1.42685e-05	2.85065e-05
99.0077	C4H2O3H	unknown	0.0203957	0.0103549	0.0235527	0.00663545	0.0236058	0.010206	0.0133393	0.00907441	0.0186891	0.00229762	0.000424907	0.000164532	0.000714597		0.000477333	0.000150986	0.000605783	0.000108184	5.77509e-05	4.29067e-05	5.82263e-06	8.23444e-06	6.94175e-05	6.29774e-05	0.000120053	9.50677e-05	0.000283518	5.18861e-05	0.00135923		0		0.000357226		0.000236948		0.00034938	0.000441567	0.000322083
99.0263	C5H6SH	methylthiofuran (methyl thiophene)	0.0192141	0.0132156	0.020991	0.0124411	0.0213143	0.0150954	0.0333225	0.0265159	0.0192656	0.0111352	0.397557	0.0787486	0.985385		0.0998384	0.017883	0.0932223	0.0329667	0.0842675	0.0378046	0.115638	0.0109815	0.0290349	0.0054428	0.0236996	0.00650979	0.0623093	0.0296086	0.637765		0.265402		0.255305		0.384243		0.124469	0.076413	0.0310997
99.0441	C5H6O2H	2-methanol furannone	0.435153	0.183012	0.376885	0.146666	0.421224	0.297486	0.604612	0.406397	0.399571	0.201238	0.200909	0.026122	0.567475		0.0658399	0.0140692	0.0624923	0.0196363	0.0309448	0.0119493	0.037246	0.00759709	0.0226571	0.00318901	0.0167703	0.00332889	0.0459587	0.02568	0.419967		0.189865		0.0613951		0.339672		0.0985528	0.0717569	0.0220855
99.0804	C6H10OH	methylcyclopentanone+cyclohexanone (26%), hexenones (74%)	0.0169298	0.00944949	0.0219636	0.00856357	0.016255	0.0134972	0.06338	0.0627703	0.0252937	0.0183546	0.0194501	0.00165864	0.0284035		0.12708	0.0456524	0.112449	0.0484644	0.0333556	0.0149128	0.0399025	0.00999735	0.0501955	0.0158151	0.0484588	0.0139287	0.0378958	0.0126942	0.116195		0.00744029		0.0713477		0.0677738		0.00988569	0.00515091	0.0211971
99.1168	C7H14H	unknown	0.0118446	0.00813913	0.0121939	0.00652622	0.0105297	0.00555509	0.0271594	0.0254848	0.011557	0.00819257	0.0196974	0.00310778	0.0380884		0.0422583	0.0116996	0.0282332	0.0209029	0.00869633	0.00387803	0.0111678	0.00305263	0.00497291	0.000277899	0.00442758	0.00184439	0.0096148	0.00443869	0.0531317		0.00852761		0.0659723		0.0517465		0.00402068	0.00231165	0.00310631
100.039	C4H5NO2H	unknown	0.00804246	0.00651827	0.00910688	0.00379994	0.00736017	0.00463376	0.0268663	0.03515	0.0275783	0.0310378	0.00326872	8.54897e-05	0.00764988		0.00411474	2.99866e-05	0.00435716	0.00246654	0.000909978	0.000275768	0.00113498	7.58437e-05	0.000864378	0.000152823	0.000441158	8.70313e-05	0.00209114	0.00113994	0.0116987		0.0037845		0.00973679		0.0402848		0.00024435	9.57335e-05	8.99354e-05
100.076	C5H9NOH	unknown	0.00159546	0.00142314	0.0018055	0.000711435	0.00119864	0.000687176	0.011048	0.0181421	0.00964755	0.0107028	0.0385117	0.00476943	0.0917302		0.0511909	0.010964	0.0440107	0.0193562	0.0155189	0.00302145	0.0166593	0.00105831	0.0126308	0.00144452	0.00940872	0.00227182	0.492762	0.49925	0.101439		0.0381448		0.091663		0.0988521		0.0181407	0.0124383	0.00763046
100.088	C6H12O	unknown	0.00139133	0.000693825	0.00131304	0.000426873	0.00125323	0.000647079	0.00246227	0.0019663	0.00226402	0.00201163	0.0494462	0.0123117	0.082068		0.0401307	0.0126962	0.0213562	0.0147593	0.0062176	0.0025903	0.00702861	0.00108418	0.00379368	0.00107157	0.00257017	0.000835134	0.000871206	0.00123207	0.0438547		0.00680472		0.0734168		0.0676477		0.00247687	0.000787223	0.00172478
100.112	C6H13NH	unknown	0.000414982	0.000349909	0.000447955	0.000212348	0.000396041	0.000216414	0.00297135	0.00528551	0.00182132	0.00203315	0.0408825	0.00606675	0.0725837		0.0371537	0.00840546	0.0257877	0.0137848	0.00882541	0.00155178	0.00939385	0.00042425	0.00698135	0.00120266	0.00464698	0.000980677	0.0191333	0.0113309	0.077842		0.0337499		0.0427252		0.0854818		0.012937	0.00909875	0.00366157
101.023	C4H4O3H	Dihydrofurandione	0.093948	0.076984	0.0493377	0.0220977	0.0552516	0.0473211	0.0716669	0.0491371	0.0439131	0.0214418	0.0540393	0.0116071	0.0654884		0.0669722	0.0228429	0.0657657	0.0458601	0.00592496	0.00250291	0.00668347	0.000586012	0.00482741	0.00116022	0.00301366	0.000773266	0.00743926	0.00553123	0.0457479		0.0090779		0.103465		0.0812475		0.00318782	0.00143163	0.00120887
101.06	C5H8O2H	methyl methacrylate (69%), other HCO2 (31%)	0.152065	0.0606497	0.136946	0.0533454	0.137572	0.0758068	0.220661	0.148315	0.149964	0.0774248	0.0706996	0.012363	0.157021		0.0437475	0.00696369	0.0488253	0.0175975	0.021602	0.00576123	0.0234247	0.00267704	0.0161061	0.00315186	0.0109505	0.00249096	0.0312688	0.0130281	0.16586		0.0885201		0.0932703		0.144377		0.0407221	0.0324985	0.0108822
101.096	C6H12OH	hexanals (47%), hexanones (53%)	0.00368171	0.00342955	0.00462635	0.00288557	0.00333469	0.00321123	0.0133938	0.0161919	0.00596661	0.00497441	0.726848	0.117507	0.249908		2.57474	0.683287	0.670489	0.522407	0.0360655	0.0202095	0.0413083	0.000558325	0.0319368	0.00683458	0.0226548	0.00760825	0.0318045	0.0230312	0.25798		0.0795716		0.336857		0.786399		0.0242928	0.00839493	0.0220378
101.132	C7H16H	unknown	0.00335325	0.00240005	0.0035499	0.00206415	0.00310568	0.00165332	0.00741381	0.00692378	0.0025548	0.00139883	0.00601672	0.0005329	0.0281962		0.00267301	0.000195026	0.0028434	0.00102223	0.000764519	0.000216017	0.000963171	0.00014608	0.000864942	0.000225237	0.000561732	0.000129377	0.00158502	0.00073428	0.0116846		0.010923		0.0126053		0.0478392		0.0016422	0.00136244	0.000688437
102.019	C3H3NO3H	unknown	0.000645553	0.000265357	0.000796846	0.000352014	0.000672684	0.000284631	0.00116445	0.000846355	0.000970722	0.000730565	0.463627	0.0691703	1.36317		0.106101	0.0183965	0.101943	0.00435086	0.0404757	0.00694789	0.0460239	0.00474659	0.0293717	0.00462194	0.0218246	0.00485626	0.0421692	0.0114503	0.416633		0.221324		0.206792		0.504911		0.134149	0.104145	0.0462187
102.055	C4H8NO2	unknown	0.000852867	0.000672156	0.00132296	0.000718423	0.00085514	0.000411401	0.00433985	0.00406139	0.00301471	0.00303609	0.0172653	0.00215971	0.0309571		0.0450542	0.0135632	0.0379283	0.0236379	0.0125123	0.00536726	0.0151632	0.00394242	0.00859843	0.0008859	0.00733448	0.00290636	0.0118335	0.00360875	0.0613998		0.00587265		0.074156		0.0520921		0.0034432	0.00164754	0.00503109
102.091	C5H11NOH	unknown	0.00229342	0.00186743	0.00275352	0.00120873	0.00194179	0.00101037	0.0130147	0.0211352	0.0109716	0.0125792	0.294156	0.0847236	0.831982		0.0416502	0.00839671	0.03091	0.0104761	0.021757	0.0093161	0.0277648	0.00655946	0.00916197	0.00199037	0.00784139	0.00253277	0.0275865	0.0185274	0.180469		0.126703		0.348505		0.21946		0.0709448	0.0470667	0.018398
103.039	C4H6O3H	acetic anhydride, MPAN and CPAN indicator	0.0976904	0.0380391	0.0887368	0.0344886	0.0856357	0.0415801	0.144004	0.0905964	0.0950181	0.0429717	0.0135224	0.00835232	0.0213376		0.0211536	0.00465443	0.0228775	0.0126635	0.00947393	0.00299424	0.0106185	0.00140002	0.0073308	0.00111044	0.00547606	0.00178123	0.00991035	0.00322558	0.0414031		0.00980455		0.00815066		0.033466		0.00536878	0.00391887	0.00257886
103.054	C8H6H	Phenylacetylene (= ethynyl benzene)	0.0112989	0.0110845	0.011323	0.0083019	0.0143	0.0185931	0.0182039	0.0219495	0.00222594	0.000769903	0.00835685	0.0043949	0.00946611		0.0211139	0.00636479	0.0163087	0.0131903	0.00384826	0.00139506	0.0045995	0.00175967	0.00226837	0.000487697	0.00161478	0.000561783	0.00401222	0.00160774	0.029916		0.00298237		0.0627533		0.0397459		0.00107074	0.000591617	0.000699324
103.075	C5H10O2H	unknown	0.0216673	0.015052	0.0219988	0.00962948	0.0147704	0.00690924	0.060252	0.0818455	0.0441437	0.0415868	0.0457196	0.00830185	0.101618		0.0289291	0.00714393	0.0299876	0.0129224	0.0122489	0.00180516	0.0128997	0.00108567	0.00807555	0.00137722	0.00545477	0.000942744	0.0196734	0.00737471	0.0915609		0.0382162		0.0865475		0.104996		0.0150515	0.0103086	0.00483784
103.112	C6H14OH	unknown	0.00298447	0.00258052	0.00316995	0.00207874	0.00277862	0.00183654	0.0061323	0.00512947	0.00122212	0.000862351	0.0266736	0.00393285	0.0522738		0.0176383	0.00504491	0.0195985	0.0108631	0.0049262	0.000564602	0.00516143	0.000312196	0.00343174	0.000670722	0.00213395	0.000280046	0.00277767	0.00187408	0.0483261		0.0201821		0.0337702		0.0527193		0.00798639	0.00532893	0.00247493
104.049	C7H5NH	Benzonitrile (benzene nitrile)	0.01876	0.0126674	0.0208459	0.00445014	0.0185161	0.0117123	0.0391408	0.0356372	0.0480003	0.0410452	0.0215814	0.00448264	0.0180695		0.0175062	0.00526391	0.00531098	0.00425013	0.00187867	0.000961837	0.00199722	8.20316e-05	0.00135127	0.000360048	0.000784214	0.000168058	0.00609282	0.00558409	0.015469		0.00370375		0.0497277		0.0326279		0.00111746	0.000765056	0.000170062
104.107	C5H13NOH	unknown	0.000490286	0.000408214	0.000749459	0.000425469	0.000584533	0.000567075	0.00185747	0.00249075	0.000786003	0.000540122	0.166566	0.0147364	0.402575		0.0813641	0.0186187	0.0651654	0.00630986	0.0188136	0.00374289	0.0212533	0.00474524	0.0169099	0.00328954	0.0114632	0.00208171	0.0228442	0.00906096	0.460401		0.329382		0.0901898		0.602274		0.0711224	0.0615435	0.0143527
105.018	C3H4O4H	unknown	0.00108522	0.000636301	0.00141007	0.000448286	0.00112429	0.000739664	0.001866	0.00184242	0.000384987	0.000325312	0.137447	0.0347526	0.569994		0.065233	0.00779822	0.0652715	0.0158458	0.0280096	0.00784882	0.0331508	0.0070669	0.0243812	0.00593281	0.0176891	0.00461832	0.0353309	0.00944311	0.301543		0.163789		0.132521		0.278225		0.07351	0.0604977	0.025983
105.033	C7H4OH	unknown	0.0110909	0.00978252	0.0103609	0.00626763	0.0098434	0.00820481	0.0323667	0.0390399	0.019079	0.0125583	0.00245992	0.001417	0.000262383		0.0161051	0.00695776	0.01185	0.00557702	0.00414296	0.00248227	0.0054807	0.0016894	0.0106293	0.00348892	0.012747	0.00504957	0.00335264	0.00171259	0.00449267		0.000323862		0.00236838		0.00332818		0.000424082	4.4015e-05	0.00245606
105.07	C8H8H	styrene	0.0836204	0.0720906	0.0875453	0.0563258	0.0991948	0.100368	0.149143	0.117475	0.0641701	0.0395081	0.0222188	0.00458641	0.0363291		0.0188587	0.0061423	0.309003	0.228714	0.00184528	0.00067477	0.00204673	0.000292781	0.00202161	0.000642588	0.00131499	0.000326706	0.00321415	0.00195974	0.0265458		0.00861621		0.0284315		0.0357815		0.00272179	0.00172796	0.000839638
106.065	C7H7NH	vinyl pyridine	0.00299324	0.00289661	0.00285344	0.00194267	0.00375627	0.00395616	0.00719899	0.00646373	0.00413803	0.0035483	0.0252443	0.00466195	0.0453063		0.0114683	0.00183052	0.0468125	0.00195779	0.0665746	0.0104319	0.0641891	0.0160124	0.0445168	0.0105574	0.0286841	0.00767877	0.0316458	0.0068374	0.343931		0.102233		0.0455599		0.17137		0.138946	0.123339	0.00743315
106.078	C8H10	unknown	0.000592513	0.000309253	0.000712928	0.000365322	0.000721137	0.000294733	0.00201411	0.00181503	0.00138083	0.00126565	0.00625723	0.000776749	0.0112807		0.00333918	0.000802685	0.00662302	0.00409598	0.00126527	0.000570562	0.00123038	0.000186831	0.00139433	0.000937481	0.00114443	0.000811811	0.00260747	0.000724764	0.0298393		0.00737573		0.0181655		0.0202702		0.00717451	0.00641238	0.000424213
106.123	C5H15NOH	unknown	0.000174524	0.000161795	0.00024148	0.000150216	0.000275786	0.000355438	0.000561505	0.000654201	0.000199466	0.000139879	0.0285622	0.00797524	0.0487192		0.0241133	0.00671774	0.0189443	0.0126929	0.00728909	0.00283393	0.00863308	0.00193941	0.00381089	0.000741256	0.00282442	0.000994245	0.00603245	0.00206666	0.0425939		0.00651616		0.100377		0.0525797		0.00280156	0.00149792	0.00203192
106.998	C2H2O5H	unknown	0.000505398	0.000369835	0.000740623	0.000413811	0.000400564	0.000420083	0.00111987	0.000846415	0.00108041	0.000743223	0.00171732	0.000445254	0.00754901		0.0017558	0.000480114	0.00155447	0.000700066	0.000273977	6.89833e-05	0.000250446	0.000117208	0.000414981	8.94964e-05	0.000323247	0.000108214	0.000992395	0.000537008	0.00741982		0.00228014		0.0107009		0.0069346		0.000871712	0.000708223	0.000298157
107.049	C7H6OH	benzaldehyde	0.0874061	0.0493695	0.0948034	0.052552	0.107824	0.0679792	0.12462	0.0770154	0.0833954	0.0429173	0.0113842	0.00344603	0.0129245		0.00883947	0.00279813	0.00415096	0.0033968	0.00104333	0.000545934	0.00111749	3.3974e-05	0.000707266	0.000230641	0.000431321	0.000104838	0.00136711	0.00112729	0.0069179		0.00195204		0.0330911		0.0185911		0.00059938	0.000389899	0.000164853
107.07	C4H10O3H	unknown	0.00413856	0.00506822	0.00532204	0.00396944	0.00640303	0.0081039	0.015435	0.0175639	0.00714465	0.00900763	0.123936	0.0188261	0.305829		0.0483565	0.00687096	0.0488665	0.00354754	0.0151731	0.00307325	0.0169114	0.00514861	0.0133164	0.00289574	0.00852776	0.00128391	0.0132395	0.00266153	0.165671		0.0460438		0.0554053		0.19115		0.0487337	0.0415713	0.015637
107.086	C8H10H	m+p-xylene (68%), o-xylene (23%), ethylbenzene (10%)	0.116809	0.0943431	0.119162	0.0521482	0.159869	0.132262	0.297277	0.23751	0.120129	0.0852733	0.00909452	0.00350536	0.0120312		0.00539917	0.00151712	0.00123483	0.00081709	0.000973541	0.000510272	0.00109853	1.01546e-05	0.000662229	0.000215258	0.000404493	0.000123475	0.00077578	0.000631937	0.0084355		0.00140528		0.0283263		0.0143951		0.000368511	0.000182107	0.000120591
108.011	C2H6NO2S	unknown	0.000192289	9.86401e-05	0.000251863	6.89902e-05	0.00016853	8.21555e-05	0.000442925	0.000408471	0.000377859	0.000299597	0.254589	0.0390751	0.0622447		0.215343	0.0487066	0.024192	0.0145512	0.0108468	0.00518835	0.00994567	0.000868773	0.00505187	0.00119471	0.00320645	0.000854751	0.0995065	0.0907051	0.0375425		0.0114912		0.271365		0.170641		0.00479923	0.00265069	0.00151135
108.044	C6H5NOH	methyl furonitrile (~33%), nitrosobenzene ~33%), pyridine aldehyde (~33%)	0.00464431	0.00248285	0.00535306	0.0016779	0.00506251	0.00279839	0.0116262	0.0115974	0.0103032	0.0091984	0.0573083	0.00707827	0.130158		0.0966377	0.022857	0.0791811	0.033421	0.0255982	0.0071402	0.0294174	0.00125892	0.0203546	0.00258971	0.0148738	0.00453305	0.0353339	0.0122551	0.204981		0.100324		0.143874		0.264555		0.0384777	0.0272005	0.0110131
108.066	C3H9NO3H	unknown	0.00291659	0.0015951	0.00283112	0.00106656	0.0027589	0.00128234	0.00915737	0.0112245	0.00538896	0.00492246	0.000279515	0.000395294	0		4.67689e-06	6.61412e-06	0.000688759	0.000826479	0.000151219	0.000213857	0.000340818	0.000476829	0.000141238	0.000244632	0.000187095	0.000266479	0	0	0		0		0		0		0	0	0
108.081	C7H9NH	dimethyl + ethyl pyridine (~50%), heptyl nitriles (~50%)	0.00551452	0.00559527	0.0049805	0.00327493	0.00505707	0.0044462	0.0295411	0.0445467	0.0187017	0.0198504	1.24145e-05	6.45013e-06	0.000100335		5.44041e-05	1.39359e-05	4.57188e-05	3.8365e-05	8.91099e-06	8.16214e-06	5.28395e-06	4.44524e-06	1.58883e-05	3.49842e-06	7.10414e-06	7.5991e-07	3.8743e-05	2.92895e-05	0.000147878		9.77793e-05		7.42793e-05		0.000364333		1.36193e-05	5.02408e-06	4.34335e-06
109.028	C6H4O2H	Quinone (=p-Benzoquinone)	0.102043	0.0383714	0.0842276	0.0242219	0.131514	0.134255	0.0835912	0.0606196	0.0805093	0.0328975	0.0019564	0.000119822	0.00713461		0.00157326	0.000105644	0.00160367	0.000636011	0.0004865	0.00013449	0.000613134	0.000157233	0.000485752	9.12017e-05	0.000376139	0.000116175	0.00113932	0.00057542	0.00486752		0.00602766		0.00375262		0.0114319		0.00118163	0.000850442	0.000303724
109.065	C7H8OH	cresols (= 4-methylphenol) (50%), anisole (50%)	0.474466	0.228624	0.409702	0.17216	0.481002	0.23917	0.93142	0.668692	0.574078	0.383545	0.00109945	0.000340379	0.0054504		0.0017103	0.00031226	0.00227386	0.00102773	0.000412942	0.000106941	0.000444775	0.000142546	0.000362256	0.000151532	0.000390075	0.000215313	0.000940376	0.000479693	0.00632914		0.00434816		0.00154359		0.00355225		0.00117569	0.00124416	0.000468509
109.101	C8H12H	unknown	0.0465412	0.0329201	0.0549261	0.0258595	0.0637368	0.0511072	0.140534	0.11598	0.0486183	0.0321252	0.000194875	6.02168e-05	0.000875354		7.16542e-05	2.25134e-05	0.000165765	3.33247e-05	5.58947e-05	1.43307e-05	5.2771e-05	1.82188e-05	6.11446e-05	1.61782e-05	4.63358e-05	7.21026e-06	6.16115e-05	3.68132e-05	0.000145386		0.000186959		0.0031998		0.0138434		1.92918e-05	1.76408e-05	0
110.036	C6H5O2H	unknown	0.0177158	0.0102714	0.0121718	0.00471621	0.0274975	0.0426217	0.0188665	0.015503	0.0274561	0.0231498	0.00132455	0.000430136	0.00617549		0.000252229	2.52761e-05	0.000758295	2.8306e-05	0.000472433	5.40636e-05	0.000413615	0.000101757	0.000286154	9.51913e-05	0.000268579	0.000120596	0.00068948	0.000339207	0.00507664		0.003004		0.00266937		0.00607178		0.000722408	0.000783563	0.000349036
110.06	C6H7NOH	unknown	0.00613268	0.0045519	0.00653287	0.00254858	0.0053317	0.00289157	0.0293842	0.0450392	0.0298988	0.03308	0.00428581	0.000183005	0.0163296		0.00314848	0.00012038	0.0048968	0.00214662	0.00107853	0.000277155	0.0013237	8.50668e-05	0.00101812	0.000232954	0.000574792	0.000123098	0.0036286	0.00230756	0.0166049		0.0127042		0.0142255		0.0819627		0.000887251	0.000699474	0.000584289
110.096	C7H11NH	C7_acrylonitriles (~50%), C3_pyrroles (~50%)	0.00318179	0.00254541	0.00345049	0.00135726	0.00268537	0.00146184	0.0183058	0.028501	0.00977371	0.00949286	9.13037e-05	1.3451e-05	0.000367937		0.000138135	2.00708e-05	9.77206e-05	6.80942e-05	2.74744e-05	1.78643e-05	3.2859e-05	1.27051e-05	2.05187e-05	8.77702e-06	2.5361e-05	1.98903e-05	7.27239e-05	5.04401e-05	0.000520873		0.000221468		0.000338822		0.00100471		3.05924e-05	2.28715e-05	2.71465e-05
111.044	C6H6O2H	methyl furfural (~50%), benzene diols (=catechol+resorcinol) (~50%), 2-acetyl furan	0.846441	0.384706	0.679461	0.287914	1.05768	1.00068	1.00402	0.683121	0.836824	0.523093	0.000219515	1.13175e-05	0.00314853		0.000664921	8.36433e-05	0.000303023	0.000385016	4.83535e-05	4.99789e-05	3.71338e-05	3.39451e-05	5.39457e-05	7.70945e-05	9.88671e-05	0.000117828	0.00040709	0.000299411	0.00227027		0.000999091		2.84555e-05		0.000206416		0.000301967	0.000279877	0.00036462
111.08	C7H10OH	C3_furans (55%), other compounds (45%)	0.0765642	0.0351626	0.0786238	0.0264659	0.0667245	0.0411684	0.225786	0.195103	0.11941	0.0783966	0.00382733	0.000478008	0.0136872		0.00385331	0.00188487	0.0063795	0.000897285	0.00169984	0.000190795	0.00192987	0.000386036	0.00132751	0.000240779	0.00112984	0.000219804	0.00338851	0.00181637	0.012124		0.0086615		0.0135451		0.0146386		0.00307547	0.00203209	0.00141605
111.117	C8H14H	unknown	0.0321826	0.0180992	0.0363834	0.0162841	0.0350186	0.021557	0.0704835	0.0589868	0.0404761	0.0315063	0.000247036	2.35626e-05	0.00100967		0.00135138	0.000161846	0.00123288	0.000622856	0.000256374	7.64781e-05	0.000341155	1.54231e-05	0.000396562	5.4482e-05	0.000333643	0.000123812	0.000721546	0.000401154	0.00182804		0.000357752		0.00108471		0.00207249		0.000148787	0.000109522	0.000195149
112.039	C5H5NO2H	dihydroxy pyridine (~50%), methyl maleimide (~50%)	0.00499681	0.00294463	0.00663126	0.00228986	0.00508316	0.00269574	0.0144679	0.016082	0.0152697	0.0146929	6.55675e-05	3.34424e-05	0.000342004		0.000305504	6.57424e-05	0.000272464	0.000131882	2.10638e-05	2.15054e-06	2.20349e-05	3.52918e-06	4.78575e-05	3.83912e-05	4.87854e-05	5.41267e-05	0.000135905	4.81019e-05	0.000539015		0.000129575		0.000372167		0.000388327		6.5726e-05	4.94274e-05	5.94424e-05
112.076	C6H9NOH	unknown	0.00225777	0.00248726	0.00272004	0.00146419	0.00176695	0.00145442	0.0153637	0.0224042	0.0108576	0.0119639	0.000175079	3.13988e-05	0.000382725		0.000376575	7.26343e-06	0.00036179	5.8416e-05	0.000130214	1.86159e-05	0.00015991	7.68198e-05	0.00010047	3.8443e-05	9.32198e-05	4.01843e-05	0.000256858	0.000171017	0.000530907		0.000172751		0.000387145		0.000351919		5.79668e-05	4.30985e-05	5.31128e-05
112.088	C7H12O	unknown	0.00131272	0.000712263	0.00136924	0.000380447	0.00108745	0.000711867	0.00128199	0.000886539	0.00269373	0.00238628	0.00175672	0.000475574	0.0103821		0.00409647	0.00118559	0.0041017	0.00095822	0.00121688	0.000258489	0.00145482	3.28806e-05	0.00139453	0.000155374	0.00111667	0.000265887	0.00351603	0.00177397	0.00798719		0.00325658		0.0131155		0.0366353		0.000447546	0.000112983	0.000410326
113.023	C5H4O3H	5-Hydroxy 2-furfural, 2-furoic acid	0.110517	0.0565885	0.107837	0.0428632	0.158485	0.194262	0.153601	0.10335	0.11828	0.0795759	0.0267588	0.00456544	0.0250909		0.0724812	0.0206178	0.0384389	0.0261945	0.00568721	0.00203602	0.00678119	0.000971551	0.00421184	0.000628106	0.0029543	0.000859434	0.00719614	0.00343757	0.0454986		0.0145299		0.0221541		0.0688257		0.00592715	0.00417604	0.002334
113.06	C6H8O2H	2-hydroxy-3-methyl-2-cyclopenten-1-one	0.227263	0.109164	0.192374	0.0788701	0.202214	0.105935	0.349155	0.252596	0.22073	0.116228	0.000767971	6.16814e-05	0.00230177		0.00138558	8.38689e-06	0.00142257	0.000551972	0.000416618	8.56748e-05	0.000462513	0.00013354	0.000463024	5.83448e-05	0.000327806	9.66824e-05	0.000949156	0.000430205	0.00360085		0.00256726		0.000959202		0.00171869		0.000754905	0.000652664	0.000215426
113.096	C7H12OH	ethyl cyclopentanone	0.00738774	0.00510299	0.0124953	0.00558423	0.010424	0.00730862	0.026278	0.0249325	0.0119833	0.00949339	0.0050621	0.00106369	0.0223518		0.00319655	0.000567935	0.00365192	0.00151818	0.00132148	0.000249323	0.00148069	0.000201309	0.000989357	0.000434273	0.00081934	0.000315331	0.00280443	0.00110812	0.0130452		0.010353		0.00757126		0.0215308		0.00260171	0.00246336	0.000912176
113.132	C8H16H	unknown	0.00916271	0.00551272	0.00904874	0.00434775	0.00765581	0.00429641	0.02198	0.0211721	0.0102412	0.00674849	0.00125314	0.000948977	0.00373953		0.00138468	6.43164e-05	0.00159936	0.000143097	0.000388853	2.74245e-05	0.000611258	0.000507553	0.000239557	0.000243057	0.000534788	0.000502555	0.00120073	0.000933593	0.00328303		0.000967933		0.000443783		0.000200016		0.00055619	0.000686909	0.000999058
114.019	C4H3NO3H	nitrofuran	0.00121576	0.000523731	0.0014098	0.000566212	0.00125146	0.00104402	0.00138469	0.000841507	0.00131076	0.000918681	0.0710173	0.0025195	0.139409		0.0805675	0.0212848	0.0562646	0.0306077	0.0145983	0.00557159	0.0155943	0.00110389	0.0128455	0.00272367	0.0086845	0.0019675	0.0212884	0.0116944	0.143908		0.0620783		0.18419		0.249013		0.0236247	0.0187991	0.00555628
114.037	C5H8NS	unknown	0.00206213	0.000835174	0.00202223	0.000964565	0.00164135	0.00109691	0.0046169	0.00611759	0.00303199	0.00294545	0.00439237	8.05059e-05	0.0158277		0.00558317	0.000154127	0.00633891	0.00355902	0.00144861	0.000595908	0.00183193	0.000198984	0.00147847	0.000256439	0.000798793	0.000184774	0.00333053	0.00234078	0.0173697		0.0124996		0.00989991		0.0678255		0.00112983	0.000760687	0.000360731
114.055	C5H7NO2H	unknown	0.00433706	0.00330595	0.00550728	0.00248318	0.00397809	0.00221801	0.025606	0.0418868	0.0255603	0.0309611	0.0204223	0.00357346	0.0624721		0.0231427	0.00515168	0.018688	0.00925542	0.00321188	0.00131404	0.0035272	0.000141005	0.003139	0.000946326	0.00215833	0.000722364	0.00830341	0.00478152	0.0622916		0.0364806		0.103596		0.100924		0.011423	0.00948272	0.00204793
114.091	C6H11NOH	unknown	0.000843573	0.000651425	0.000984207	0.000410758	0.000713295	0.000350822	0.0055093	0.0081022	0.00392457	0.00427702	0.00108836	0.000325153	0.00567539		0.00133195	0.000168989	0.00132877	0.000558584	0.000417914	9.54241e-05	0.000519989	0.000163746	0.000440672	0.000141027	0.0003632	0.000121048	0.000834376	0.000466711	0.00511025		0.00386194		0.00499115		0.00916343		0.00077796	0.000751871	0.000456088
114.128	C7H15NH	unknown	0.000226082	0.000174334	0.000290998	0.000180032	0.000243726	0.00012079	0.00195808	0.00370952	0.000852279	0.000989553	0.000517824	0.000248905	0.00240578		0.000540071	7.64368e-05	0.0015571	0.000644779	0.000145654	1.72259e-05	0.000154449	4.03646e-05	0.000256	5.21028e-05	0.000115507	1.21906e-05	0.000607252	0.000445614	0.00481698		0.00204676		0.00168134		0.0214011		0.000127515	5.6337e-05	5.55021e-05
115.039	C5H6O3H	5-hydroxymethyl-2[3H]-furanone	0.225118	0.0918413	0.199139	0.0802053	0.236123	0.23231	0.231545	0.131631	0.153962	0.0716464	0.00446584	0.00126504	0.0202125		0.00249504	0.000779649	0.00393205	0.000446315	0.000943669	0.000174257	0.00132173	0.000683641	0.000859414	0.000385285	0.000931671	0.000408011	0.00216831	0.0014907	0.0181642		0.00517239		0.00286875		0.013338		0.00457208	0.0051603	0.00138608
115.075	C6H10O2H	C6 diketone isomers (46%), C6 esters (54%)	0.0282212	0.0156636	0.0342826	0.0141194	0.0282604	0.0180479	0.0643634	0.0509628	0.0383366	0.0248249	0.00346226	0.00228011	0.0173549		0.00535809	0.000756105	0.00638962	0.00153036	0.00101035	0.000116962	0.00107907	0.00031911	0.00114574	0.000482125	0.000795818	0.000518439	0.00375364	0.00111323	0.0288634		0.0288534		0.00894204		0.0246313		0.00815882	0.00724216	0.00155677
115.112	C7H14OH	heptanal (63%), 2,4-dimethyl-3-pentanone (24%), heptanone (13%)	0.00816897	0.00524805	0.00907908	0.00446244	0.00786179	0.00522156	0.0164335	0.0155979	0.00806807	0.00608686	0.000482614	0.000195511	0.00268469		0.000833983	0.00016885	0.00107946	0.000453607	0.000354895	0.000102361	0.000471111	0.000203892	0.00040546	9.28345e-05	0.000311224	0.000105074	0.000737851	0.000486186	0.00155636		0.000590917		0.00139735		0.00285882		0.000143235	7.55626e-05	0.00025683
116.034	C4H5NO3H	unknown	0.00135105	0.000690816	0.00175357	0.000595972	0.00139352	0.00073582	0.00284884	0.00243285	0.0027528	0.00219295	0.00163832	8.66953e-05	0.00674545		0.000997391	2.75348e-05	0.00193421	0.000779364	0.000386149	0.00010809	0.000466537	4.40092e-05	0.000368795	9.18893e-05	0.000190783	2.74632e-05	0.00151355	0.000991866	0.00500702		0.00277249		0.00527196		0.0336176		3.10105e-05	1.81694e-05	0.00012102
116.071	C5H9NO2H	unknown	0.000996731	0.000838563	0.00117364	0.000421806	0.00101142	0.000778792	0.00389203	0.00414479	0.00255241	0.00256134	0.000506413	6.79075e-05	0.00593619		0.00291309	0.000559416	0.00222971	0.00114289	0.000548009	5.69584e-05	0.000838601	0.000490154	0.000709401	0.000416356	0.000528428	0.000188487	0.00224048	0.00167456	0.00803864		0.00277227		0.000222136		0.00118037		0.00101992	0.00125889	0.00156214
116.107	C6H13NOH	unknown	0.00203445	0.0018426	0.00216479	0.00101549	0.00164432	0.00096111	0.00945695	0.0140238	0.00808083	0.00884973	5.62993e-05	2.79794e-07	0.000554404		0.000146291	2.67848e-05	0.000306703	0.000187976	2.80482e-05	6.13993e-06	5.25926e-05	7.85981e-06	0.000116509	2.50559e-05	4.10642e-05	1.0101e-05	0.000167012	0.000110673	0.000781957		0.000294844		0.000148377		0.00303548		4.07854e-05	2.50827e-05	5.69457e-05
117.018	C4H4O4H	unknown	0.00628261	0.00178492	0.00684184	0.00306687	0.00571536	0.00311608	0.00635398	0.00265081	0.00567954	0.00178424	0.000106972	2.97943e-05	0.000555659		0.000210172	1.82124e-06	0.000182667	7.11296e-05	4.13e-05	2.09125e-06	5.17993e-05	4.00765e-05	2.68361e-05	1.59004e-05	3.10083e-05	2.38282e-05	0.000115177	9.97256e-05	0.000741585		0.000215568		0.000202039		0.00049609		4.325e-05	6.11648e-05	4.71383e-05
117.055	C5H8O3H	2,5-Dihydroxymethyl dihydrofurfural, C5 3-oxy 2-DBE isomers	0.156292	0.0762626	0.105513	0.0391558	0.0941088	0.0445217	0.14697	0.0880588	0.102154	0.0464609	0.00923913	0.000808279	0.03095		0.0137423	0.00529162	0.0109564	0.00319506	0.00395751	0.000997044	0.00498613	0.00155421	0.00290751	0.000450462	0.00261405	0.000481133	0.0081655	0.00604072	0.0478332		0.0296348		0.0079251		0.0279047		0.00901929	0.00672096	0.00331529
117.07	C9H8H	indene (96%), methyl ethynyl benzene (4%)	0.0288888	0.0289601	0.0316225	0.023357	0.0379928	0.0446173	0.0549598	0.0618718	0.0128229	0.00732369	0.0204853	0.0039466	0.0341712		0.0315457	0.00760318	0.0215465	0.0134943	0.0132132	0.00504713	0.017625	0.00212241	0.00531506	0.000786043	0.00363377	0.00119768	0.0177084	0.0138753	0.0440659		0.0101393		0.050491		0.0967002		0.00537851	0.00457307	0.0018363
117.091	C6H12O2H	butyl ester acetic acid, other C6_esters	0.00576324	0.00448965	0.012458	0.0080919	0.00511119	0.00271991	0.0272564	0.0383773	0.0255142	0.0241843	0.000102305	6.243e-05	0.000476731		0.000298572	4.42424e-05	0.000210729	0.000111037	2.56697e-05	1.69285e-06	2.74614e-05	4.75533e-06	2.75264e-05	1.75465e-05	2.20309e-05	1.1711e-05	0.000136158	8.94186e-05	0.000538057		0.000171738		0.000405541		0.000771775		6.52914e-05	5.73179e-05	3.28211e-05
117.127	C7H16OH	unknown	0.00660799	0.00505585	0.00523044	0.00279702	0.00454408	0.00296982	0.00857387	0.00637774	0.00243255	0.00189923	0.00275831	0.00135083	0.00648785		0.00109785	0.000501431	0.00223375	0.00143116	0.000852557	0.000284771	0.00125588	0.000133517	0.000477454	0.000164173	0.000430002	0.000208466	0.00195146	0.00133171	0.00372074		0.00311351		0.000247946		0.0143328		0.000929725	0.000687004	0.000160781
118.013	C3H3NO4H	unknown	0.000353803	0.000172236	0.0003973	0.000116567	0.000278985	0.000122171	0.000692584	0.000522689	0.000595502	0.000472031	0.0118961	0.000738658	0.0323764		0.0140841	0.00285892	0.0130695	0.00507932	0.00417562	0.000751988	0.00482566	0.00013685	0.00316668	0.000236139	0.00226127	0.000539629	0.0083876	0.00435292	0.0311216		0.0163583		0.0321357		0.0603401		0.00444363	0.00319645	0.00236098
118.05	C4H7NO3H	butene nitrates	0.00230711	0.00170765	0.00246692	0.00104941	0.00228189	0.00139781	0.00517594	0.00453101	0.00318011	0.0024982	0.00174731	0.000180129	0.00598645		0.0023108	0.000404144	0.00297345	0.00134385	0.00066592	0.000161261	0.000879572	0.00015351	0.000614691	5.55557e-05	0.000412494	0.000121094	0.00168878	0.000701133	0.00562439		0.00312529		0.00857957		0.0226857		0.000327898	9.97104e-05	0.000266911
118.065	C8H7NH	Benzeneacetonitrile (benzyl nitrile)	0.0100563	0.0109081	0.00952651	0.00625194	0.0102781	0.0111909	0.0277789	0.0297427	0.0160425	0.0156415	0.00366871	0.00213003	0.0217505		0.000420755	5.09656e-05	0.00173363	0.00036786	0.000564654	9.71798e-05	0.000787933	0.00058799	0.000484417	0.000435982	0.000477588	0.000239196	0.000663514	0.000171396	0.0112122		0.00653631		0.000604085		0.00689462		0.0018848	0.002235	0.000798135
119.034	C4H6O4H	unknown	0.0112768	0.00663517	0.00880087	0.00289787	0.0119971	0.00860009	0.0128452	0.00947638	0.00688773	0.00344782	0.0822977	0.011686	0.110816		0.13402	0.0361799	0.10569	0.0704479	0.0151221	0.00529834	0.0169163	0.00246553	0.0111003	0.00258472	0.00706798	0.00153725	0.0205862	0.0111258	0.151408		0.0458478		0.124046		0.223357		0.01543	0.0106147	0.00374595
119.049	C8H6OH	benzofuran	0.0395444	0.0197832	0.0367505	0.0201774	0.0417123	0.0244078	0.0543713	0.0299774	0.0374352	0.0199624	0.00850944	0.00208135	0.060433		0.00369843	0.000729663	0.00612015	0.00160205	0.00215618	0.000525769	0.00266027	0.00107549	0.00157023	0.000714857	0.00138755	0.000535645	0.00367357	0.000924916	0.0325831		0.0199666		0.0167403		0.00732388		0.0063596	0.00632874	0.00333273
119.07	C5H10O3H	unknown	0.00333223	0.00318855	0.00406357	0.00252675	0.00437701	0.00426671	0.00897241	0.0081358	0.00520879	0.00510224	0.06344	0.00144797	0.221102		0.0528318	0.0117447	0.0542071	0.0284411	0.0105033	0.00420926	0.0117991	0.000192853	0.00862471	0.00204514	0.00566825	0.00147633	0.020019	0.00893329	0.165847		0.0935438		0.199878		0.2203		0.0286933	0.0254475	0.00871288
119.086	C9H10H	Indane (13%), MethylStyrene (84%), propenyl benzene+methyl ethenyl benzene (3%)	0.0477515	0.04218	0.0496089	0.0300617	0.0531885	0.0491089	0.0859172	0.0749964	0.0325879	0.0187172	0.00390849	0.000988609	0.0178337		0.00863261	0.000724985	0.00683676	0.00396957	0.00220718	0.000813182	0.0028515	0.00083784	0.00218933	0.000457945	0.00161267	0.000609365	0.00679017	0.00514032	0.0138451		0.00950401		0.0173777		0.0372874		0.00137884	0.00116696	0.000776154
120.044	C7H5NOH	unknown	0.00373594	0.0028272	0.00384749	0.00159529	0.0038032	0.0029156	0.00816387	0.00906272	0.00780334	0.00719571	0.00326464	0.000211988	0.00794547		0.00360499	4.30741e-05	0.00469301	0.00275121	0.000901916	0.000311089	0.00124508	5.31584e-05	0.00119242	0.000208273	0.000590554	0.000105877	0.00277135	0.00213364	0.0126335		0.00782739		0.00854089		0.0841372		0.000363142	0.000145956	0.000170083
120.066	C4H9NO3H	unknown	0.00156211	0.001374	0.00199855	0.00116316	0.00170642	0.00151805	0.0035945	0.00294703	0.00233717	0.0021732	0.00978032	0.0011478	0.0393752		0.00865566	0.00250172	0.00812869	0.0022283	0.00265461	0.00041003	0.00341076	0.000973458	0.00250365	0.000424807	0.00176392	0.000437893	0.00629799	0.00316777	0.0338198		0.0169676		0.0175565		0.0278102		0.00671923	0.00711498	0.00270482
120.081	C8H9NH	dihydro pyridine	0.00136054	0.00142419	0.00117457	0.00081189	0.00137401	0.00131975	0.00503398	0.00582537	0.00292021	0.00280407	0.012688	0.00982511	0.0195069		0.020836	0.0015969	0.0128334	0.0037886	0.0139277	0.00366822	0.0187333	0.0111049	0.00872797	0.00269957	0.00773907	0.00317313	0.0143814	0.00673486	0.0196214		0.00364841		0.0453417		0.00354522		0.000925876	0.00100953	0.00435748
120.093	C9H12	unknown	0.00048657	0.00034517	0.000532591	0.000171718	0.000461381	0.00024079	0.00121977	0.0011717	0.00115471	0.00112238	0.0146381	0.0041248	0.053256		0.00971363	0.00188974	0.0106673	0.00294477	0.00200667	0.000437291	0.00230889	0.000571251	0.00222902	0.000724735	0.00154152	0.000709881	0.00633572	0.00248706	0.0572762		0.0497586		0.0311175		0.0587457		0.0168194	0.0135954	0.00284825
120.138	C6H17NOH	unknown	0.000127538	0.000107868	0.000172513	9.60826e-05	0.000167546	0.000165147	0.000437	0.000568634	0.000167631	0.000117601	0.00638296	0.00041378	0.0269065		0.00580637	0.000535947	0.00477219	0.00274775	0.00183048	0.000848883	0.00240224	0.000183507	0.00137552	0.000322209	0.00091079	0.000381514	0.00591618	0.00509402	0.0119683		0.00763017		0.0366436		0.0822402		0.000297526	0.000198571	0.000681997
121.013	C3H4O5H	unknown	0.00164688	0.00109717	0.00197841	0.000825998	0.00148157	0.00122714	0.00212555	0.00131902	0.00197183	0.00121499	0.00157281	0.000170023	0.00554816		0.000934066	6.62542e-05	0.00259685	0.000640656	0.000292383	5.06541e-05	0.000457909	6.47616e-05	0.000477252	8.83793e-05	0.000261984	0.000112766	0.000939539	0.000627564	0.00500255		0.00245896		0.0077294		0.0531548		1.3183e-05	1.08569e-06	5.44213e-05
121.05	C4H8O4H	unknown	0.00679224	0.00468846	0.00854396	0.00494007	0.00911087	0.00873059	0.0129489	0.0096633	0.00709848	0.00428458	0.00143397	5.02893e-05	0.00431417		0.000795678	5.78422e-05	0.000824904	0.000156289	0.000309094	0.000108043	0.000396208	0.000108444	0.000280239	4.89715e-05	0.000193119	4.8908e-05	0.000833301	0.000533019	0.00401961		0.00218304		0.00288417		0.00427292		0.000133195	5.11799e-05	0.000124839
121.065	C8H8OH	tolualdehyde (~100%), acetophenone, dihydro benzofuran	0.107878	0.0842907	0.125766	0.0800772	0.124589	0.103282	0.201991	0.165801	0.113317	0.0755326	0.00033651	9.23062e-05	0.00173129		0.000385878	4.25805e-05	0.000641237	0.000315499	8.11915e-05	1.43393e-05	8.44653e-05	8.58654e-06	9.774e-05	2.65937e-05	5.58432e-05	6.56758e-06	0.000326557	0.000254992	0.0030187		0.00124237		0.00157569		0.0158466		9.45942e-05	3.39675e-05	5.76246e-05
121.101	C9H12H	C9 aromatics	0.0510197	0.0439398	0.050832	0.0203675	0.0689601	0.0524667	0.132779	0.111696	0.0492413	0.0337481	0.00412182	0.00149837	0.0148386		0.00339063	0.000645289	0.0041153	0.000784358	0.000851811	9.09287e-05	0.000921625	0.000203489	0.000899957	0.000348448	0.000616534	0.000403717	0.00238427	0.000566948	0.0179626		0.015341		0.00531522		0.0134114		0.0052311	0.00427343	0.00105489
121.122	C6H16O2H	unknown	0.00240174	0.0024064	0.00430641	0.0022933	0.00474888	0.00716075	0.0053529	0.00514973	0.00219125	0.00137386	0.000421652	5.7833e-05	0.00203287		0.000590108	4.84899e-05	0.000420421	0.000247564	0.00016797	6.76141e-05	0.000237334	6.89767e-05	0.000128179	5.82751e-05	0.000130105	6.4784e-05	0.000461096	0.000355983	0.00184664		0.000882792		0.000711238		0.00237461		0.000235598	0.000214182	0.000226345
122.024	C6H3O2NH	unknown	0.000750252	0.000399293	0.000757819	0.000204921	0.000724157	0.000361688	0.00139301	0.0014622	0.00103322	0.000509569	0.000494061	4.47188e-06	0.00266758		0.000878753	0.000180334	0.000711121	0.000316586	0.000180496	4.92694e-05	0.000224032	4.62562e-05	0.000177857	3.13642e-05	0.000136397	4.92494e-05	0.00049551	0.000349735	0.00399684		0.010679		0.00119791		0.0113672		9.93756e-05	3.90201e-05	0.000196953
122.045	C3H7NO4H	unknown	0.00162736	0.00120166	0.00190254	0.000944083	0.00166968	0.00120175	0.00413731	0.00409529	0.00195768	0.00114492	0.00235745	0.00013636	0.00891759		0.00149206	4.33083e-05	0.00224436	0.00100517	0.000491876	0.000133527	0.000526961	5.40009e-05	0.00039331	0.000100064	0.000223755	2.79965e-05	0.00164972	0.00127068	0.00673889		0.00421995		0.00766208		0.0350325		0.000139479	4.25392e-05	6.54104e-05
122.06	C7H7NOH	unknown	0.0041887	0.00239576	0.00448873	0.000985656	0.0038767	0.00191544	0.0134737	0.0185663	0.0131662	0.0133	0.0251708	0.00297792	0.0822366		0.0110997	0.00150134	0.0583363	0.0038566	0.00419748	0.000692723	0.00393858	0.000372585	0.00287527	0.000656053	0.00195169	0.000890879	0.00833734	0.00354092	0.0627629		0.0407159		0.0539106		0.180636		0.0126744	0.0106046	0.00269889
122.081	C4H11NO3H	unknown	0.00109648	0.000430672	0.0011205	0.000569138	0.000957002	0.000503945	0.00358534	0.00446384	0.0027117	0.00264126	0.00225422	0.00174351	0.0105809		0.0037258	0.000962798	0.00326384	0.00112369	0.000449582	0.000138557	0.000604341	0.000187863	0.000777159	0.000396836	0.000609796	0.00045578	0.00263458	0.00156945	0.0221609		0.0156421		0.00113086		0.0148268		0.00588667	0.00502727	0.00114703
122.096	C8H11NH	unknown	0.00239754	0.00260473	0.0021621	0.00150463	0.00179701	0.0014566	0.0153702	0.026242	0.00964016	0.0101564	0.000467747	0.000374354	0.00230205		0.000867799	2.51257e-05	0.00100945	0.000462259	0.000100678	1.08519e-05	0.000126125	2.22514e-05	0.000226828	0.000175269	0.000179047	0.000167813	0.00088683	0.000414408	0.00163856		0.00100077		0.00494909		0.00620919		0.000207782	8.76767e-05	9.58283e-05
123.044	C7H6O2H	salicyladehyde (~100%), benzodioxole, benzoic acid	0.0856238	0.0469286	0.0787813	0.0350929	0.0802963	0.045635	0.144798	0.148793	0.0788246	0.0239931	0.000713384	3.33898e-05	0.00470924		0.00154061	0.000604958	0.000940933	0.000325094	0.000207141	1.43458e-05	0.000264272	0.000107665	0.000153585	5.68933e-05	0.000194275	0.000132916	0.00148018	0.00136769	0.00359405		0.00100637		0.00199145		0		0.000475715	0.000551208	0.000536397
123.08	C8H10OH	4-ethylphenol+dimethylphenol (~50%), methylanisole (~50%)	0.124939	0.0537415	0.108706	0.036557	0.125132	0.0632722	0.251275	0.200859	0.187826	0.134033	0.00545528	0.000559871	0.0122102		0.00353292	0.000488862	0.00590452	0.00305649	0.00176184	0.000533197	0.00244629	0.00042008	0.00188511	0.000429255	0.00153793	0.000678014	0.00413502	0.00247212	0.00957694		0.00814918		0.0660353		0.0349471		0.00393839	0.0037804	0.000904105
123.117	C9H14H	unknown	0.0311782	0.0245842	0.0361145	0.0169468	0.0479395	0.038662	0.104473	0.0816313	0.0316305	0.0213406	0.000965083	0.000366951	0.00245518		0.00124611	0.000245174	0.000409486	6.62345e-05	0.000181845	1.90519e-05	0.000180684	4.09526e-05	0.000182983	9.70347e-05	0.000154381	6.36485e-05	0.000209511	6.18109e-05	0.00177529		0.000752618		0.00283964		0.00151316		0.00020135	0.00014457	0.000111067
124.039	C6H5NO2H	nitrobenzene	0.00596462	0.00251005	0.00790921	0.00420329	0.00759487	0.00497164	0.0108275	0.00794058	0.00946757	0.00661746	0.000151256	9.86174e-05	0.000498148		0.000408933	6.73249e-05	0.000358221	0.000178552	2.77355e-05	5.01884e-07	2.8797e-05	6.96379e-06	4.89888e-05	3.98938e-05	3.25126e-05	2.12708e-05	0.000254872	0.000160752	0.000819474		0.000249964		0.000604967		0.00158341		6.8542e-05	4.38735e-05	4.11664e-05
124.052	C7H8O2	unknown	0.0134103	0.00948069	0.00642954	0.00356399	0.0281604	0.0552697	0.00916931	0.00737374	0.024291	0.0179943	0.000358252	0.000126484	0.000350081		0.000270085	0.000183632	0.000760336	1.98957e-05	0.00010449	3.6791e-05	0.000127859	9.33601e-05	9.62407e-05	7.79432e-05	0.000133373	8.6664e-05	0.000289138	0.000230387	0.00105431		0.000160131		0.000515375		0.00076207		0.000144897	0.000155476	8.59626e-05
124.076	C7H9NOH	unknown	0.00257975	0.00220275	0.00285437	0.00121746	0.00215562	0.00172284	0.0141199	0.02085	0.0134217	0.0147987	0.00661694	0.000839688	0.0197884		0.00718433	0.000786956	0.00344833	0.00258581	0.00103382	0.000165327	0.00132861	0.000502492	0.000858147	0.000104261	0.000480739	9.2188e-05	0.00066929	0.000178308	0.0104255		0.0058888		0.0222244		0.0336663		0.00147577	0.000948157	0.000406194
124.112	C8H13NH	unknown	0.00222549	0.00150847	0.00238929	0.000925824	0.00164141	0.000639785	0.0133121	0.0226856	0.00777602	0.0079561	0.000117182	1.41363e-05	0.000395925		0.000175301	4.2289e-05	0.000415454	0.000179102	0.000385381	8.24498e-05	0.000507873	0.000251242	0.000174781	7.03988e-05	0.000184167	7.39132e-05	0.000148033	6.99285e-05	0.000470255		0.000251734		0.00019181		0.000464539		8.46185e-05	5.9304e-05	4.80007e-05
125.023	C6H4O3H	hydroxy benzoquinone	0.0788324	0.0274845	0.0733957	0.0184943	0.0936516	0.0883953	0.0522358	0.0223223	0.0674249	0.0263225	0.00304961	0.000324408	0.0124487		0.00227465	0.000448445	0.00156711	0.000436466	0.000804537	0.000113819	0.00092543	2.00435e-05	0.000612129	0.000173935	0.000440082	0.000110928	0.00154922	0.000387569	0.0104081		0.00422899		0.00643652		0.017872		0.00136878	0.00118421	0.000443871
125.06	C7H8O2H	guaiacol (=2-methoxy phenol) (~100%), propionylfuran, acetylmethylfuran	0.547542	0.29544	0.367894	0.122493	0.90093	1.44662	0.629518	0.453151	0.84494	0.635634	0.0577298	0.00485722	0.107263		0.0668586	0.0182686	0.0522636	0.034738	0.0120481	0.00454688	0.0139243	0.0011216	0.00817129	0.00195526	0.00539769	0.00108113	0.0164202	0.0105905	0.105284		0.0324967		0.0963233		0.152683		0.0113497	0.0076301	0.00277724
125.096	C8H12OH	unknown	0.0208101	0.0185011	0.0294676	0.0151021	0.023172	0.020761	0.0939663	0.0935391	0.0211226	0.0125701	0.01781	0.00446199	0.0844881		0.00528747	0.000895216	0.00542015	0.00118413	0.00401894	0.00239462	0.00532162	0.000520141	0.00137487	0.000597862	0.00107143	0.000357185	0.00240695	0.001244	0.0257649		0.0175753		0.0110676		0.0149854		0.00581056	0.00503064	0.00162379
125.107	C7H12N2H	unknown	0.0056761	0.00569409	0.00493185	0.00348136	0.00383611	0.00621441	0.00317798	0.00214026	0.0125004	0.0112189	0.00667595	0.000447485	0.0203675		0.00326136	2.90469e-05	0.00556285	0.00188321	0.00169506	0.000458983	0.0024231	0.000227696	0.00234477	0.000354948	0.00103538	6.69049e-05	0.00363078	0.00147074	0.0195564		0.0133355		0.0195826		0.133611		0.00133352	0.000881374	0.000512051
125.132	C9H16H	unknown	0.019358	0.0141248	0.0170721	0.00861212	0.023053	0.0246988	0.0393843	0.0376778	0.0276289	0.0253738	0.0426729	0.00533538	0.153988		0.0262826	0.00542942	0.0243164	0.0100686	0.011342	0.00597143	0.0146613	0.000575628	0.00528874	0.00144584	0.00361157	0.00102746	0.0117018	0.00603389	0.0890849		0.0517438		0.0999225		0.130534		0.015044	0.0114119	0.00422355
126.019	C5H4NO3	unknown	0.00197298	0.000896735	0.00187094	0.000558469	0.00375753	0.00268553	0.00299111	0.0014127	0.00240947	0.00150425	0.0020444	5.98881e-05	0.00454348		0.00198889	7.8986e-05	0.00296048	0.00124484	0.000138781	3.09663e-05	8.26544e-05	2.73252e-05	0.000617282	7.41833e-05	0.000316666	4.76113e-05	0.00185416	0.0011371	0.0104323		0.0061474		0.00521486		0.0722569		0.000217997	0.000130519	0.000124083
126.037	C6H8NS	unknown	0.00392105	0.00174922	0.0040666	0.00191597	0.00665632	0.00434938	0.00980054	0.00613037	0.00676721	0.00554877	0.00148365	0.00030914	0.00589817		0.000517854	1.77186e-05	0.000606011	5.45652e-06	0.000346448	6.86723e-05	0.00044304	0.000234127	0.00023171	2.20383e-05	0.000178418	5.84586e-05	0.000495718	0.000367413	0.00151464		0.000642978		0.00337285		0.000978634		0.000134603	5.2203e-05	0.000103009
126.055	C6H7NO2H	unknown	0.00273443	0.00200333	0.00445901	0.00208779	0.00236551	0.00161879	0.0196093	0.0326958	0.026504	0.0323838	0.0109578	0.00280159	0.0378736		0.00654787	0.00114664	0.00881377	0.00148297	0.0018425	0.000302243	0.00197237	0.000415743	0.00176925	0.000520598	0.00127922	0.000722158	0.00427605	0.0012587	0.0425542		0.033281		0.0236718		0.0494503		0.0100313	0.0079882	0.00192338
126.091	C7H11NOH	unknown	0.000994399	0.00110967	0.00128125	0.00066422	0.00112073	0.00104471	0.00703548	0.00991198	0.00301228	0.00303635	0.00193629	0.000142967	0.0110513		0.00088499	4.31542e-05	0.00119545	0.000455107	0.00041804	0.000125812	0.000519301	0.000142587	0.000336136	0.000106724	0.000267264	9.44638e-05	0.000860327	0.000556058	0.0104343		0.00625541		0.00324128		0.0171027		0.00112619	0.00103037	0.000290096
126.104	C8H14O	unknown	0.000860938	0.00051399	0.000917974	0.00027601	0.000584078	0.000461952	0.00185616	0.0015161	0.00342177	0.00299937	0.00526476	0.000577204	0.0214251		0.00322069	9.50868e-05	0.00370942	0.00186405	0.000995108	0.000349919	0.00136444	0.000135	0.00104333	0.000215999	0.000587112	0.000159843	0.00326386	0.00235594	0.0115197		0.00671945		0.0282593		0.0850436		0.000218207	0.000108151	0.000335351
126.128	C8H15NH	C8 nitrile	0.000159978	0.00011058	0.000255405	0.000176191	0.00014363	0.000102277	0.00214014	0.00410788	0.00125156	0.00160162	0.000699311	1.27045e-05	0.00272161		0.000503816	1.44696e-05	0.00119079	0.000313253	0.000168261	5.42814e-05	0.000184884	1.48409e-05	0.000199356	3.21502e-05	0.000102177	8.19126e-06	0.000498877	0.000349759	0.00273352		0.00121738		0.00316612		0.0232923		2.7216e-05	5.20036e-06	5.31229e-05
126.97	C2H6S3H	dimethyl trisulfide	0.000983014	0.00117725	0.00127074	0.000809549	0.00102179	0.00199312	0.00142227	0.00136851	0.00166981	0.00178049	0.000277285	4.46518e-05	0.00149185		0.000221286	2.39757e-05	0.000325099	0.000171792	5.68323e-05	1.24396e-05	6.74773e-05	1.0424e-05	6.43055e-05	1.81614e-05	4.26731e-05	1.39192e-05	0.000230932	0.00017839	0.00108897		0.000636811		0.00177597		0.00896542		5.16631e-05	2.73087e-05	3.85199e-05
127.039	C6H6O3H	5-Methyl hydroxy 2-furfural	0.332833	0.175278	0.270054	0.0998774	0.702901	0.585963	0.562329	0.363673	0.304483	0.164186	0.000684833	0.000213079	0.00414689		0.00162721	0.000123468	0.00144842	0.000777307	0.000448625	0.000106897	0.000603318	0.000188132	0.000438973	0.000134759	0.000362477	0.000118032	0.00135718	0.00101832	0.00290855		0.00153763		0.00245342		0.00405562		0.000245724	0.000184327	0.000497509
127.075	C7H10O2H	unknown	0.0437914	0.0196721	0.0393797	0.0134833	0.0298156	0.0261527	0.0855656	0.0763066	0.0606691	0.0370803	0.000488693	0.000101329	0.00198498		0.00115191	0.000196456	0.00104922	0.000613952	0.000305763	0.000110209	0.0003992	3.25425e-06	0.000276807	5.13285e-05	0.000217654	6.58442e-05	0.000661919	0.000419765	0.0026985		0.00169781		0.00206922		0.0135836		7.69921e-05	3.37525e-05	0.000159943
127.112	C8H14OH	unknown	0.0206049	0.0110841	0.0241831	0.0101151	0.0381178	0.0275608	0.0545619	0.0333985	0.0269547	0.019186	0.00192579	7.85125e-05	0.00590391		0.00116202	1.87334e-05	0.00169694	0.000763836	0.000386306	0.000122331	0.000434524	2.80733e-05	0.000317255	7.6273e-05	0.000160682	1.93408e-05	0.00118608	0.000975764	0.00561827		0.00295354		0.00511756		0.0285191		0.000162644	6.33105e-05	6.37682e-05
127.148	C9H18H	unknown	0.00296231	0.00219341	0.00306982	0.00161302	0.00144069	0.000810971	0.008374	0.00928336	0.00510224	0.00406988	0.00431037	0.0013556	0.0164944		0.00416172	0.00119359	0.00401185	0.000282073	0.00236542	9.98293e-05	0.0032733	0.00184339	0.00166087	0.000347914	0.0017732	0.000454206	0.00387981	0.00254974	0.0140622		0.00748937		0.0103301		0.00844332		0.00508958	0.00516901	0.00221869
128.062	C10H8	unknown	0.00189043	0.00159176	0.0022165	0.00070911	0.000858687	0.00107243	0.00478499	0.00524557	0.00296011	0.00323978	0.00458331	0.00265227	0.0136756		0.00561345	0.00115243	0.00582984	0.00148077	0.00120747	0.000200008	0.00134113	0.000359092	0.00148505	0.000629006	0.00110513	0.000839549	0.00360328	0.00102066	0.0411844		0.0450284		0.00215267		0.0239882		0.014334	0.0135699	0.00192827
128.071	C6H9NO2H	unknown	0.0017419	0.00137082	0.00222271	0.000930841	0.000958378	0.00064674	0.010247	0.0167739	0.00958305	0.0112174	0.000205441	2.0097e-05	0.000650983		0.000362501	6.65212e-05	0.000446303	0.00017264	9.304e-05	2.99024e-06	0.000103707	2.97354e-05	8.32901e-05	2.64946e-05	8.99102e-05	4.81228e-05	0.000482112	0.000334177	0.000828467		0.000356666		0.000457883		0.000761928		0.0001745	0.00015571	0.000101272
128.107	C7H13NOH	unknown	0.000433183	0.000331029	0.000504955	0.000206579	0.000265359	0.00021744	0.00267047	0.00429533	0.00200682	0.0020427	0.00487918	0.000868807	0.0246949		0.00528903	0.000979087	0.00289411	0.000983131	0.00179329	0.000504479	0.00246166	0.000623718	0.00144406	0.000222421	0.00146518	0.000566884	0.00622985	0.00525205	0.0182257		0.00725717		0.0124958		0.00870339		0.00295924	0.00242425	0.00212376
128.143	C8H17NH	unknown	0.000198813	0.000124289	0.000256726	0.000115026	0.00015436	4.70953e-05	0.00112944	0.00186111	0.000501372	0.000509294	0.00343016	0.000376161	0.00784917		0.0051273	0.00106164	0.0032625	0.00219585	0.000972577	0.000168832	0.00120517	0.000262448	0.000848006	2.06513e-05	0.00051316	9.37658e-05	0.00104485	0.000338417	0.00805768		0.00415324		0.00889091		0.0208327		0.000994475	0.000545406	0.000507801
129.055	C6H8O3H	2,5-di(hydroxymethyl)furan, methyl hydroxy dihydrofurfural	0.145561	0.0549146	0.133961	0.0485554	0.167868	0.1626	0.237701	0.188284	0.188629	0.116734	0.00221964	0.000138662	0.00634456		0.00279585	5.442e-05	0.00336756	0.00217369	0.0008209	0.0003109	0.00111171	1.96592e-05	0.000879459	0.000134076	0.000550667	0.000187278	0.0022985	0.0013467	0.00969637		0.00593827		0.0109174		0.0251797		0.000584554	0.000453222	0.000228281
129.07	C10H8H	Naphthalene	0.0766046	0.0621182	0.0779917	0.0558644	0.0815172	0.0929796	0.128595	0.12565	0.0326347	0.0126315	0.00115774	8.44297e-05	0.00225409		0.000956334	4.2482e-05	0.000987636	0.000412493	0.000423754	0.000151778	0.000549636	3.11839e-06	0.0003273	6.94189e-05	0.000245648	9.75744e-05	0.000667494	0.00041225	0.00958827		0.00614671		0.00151481		0.0103842		0.000487672	0.000455283	0.000117321
129.091	C7H12O2H	unknown	0.00657258	0.00481522	0.013205	0.00626847	0.00983378	0.00920396	0.0250658	0.0200414	0.0109368	0.00840143	0.000539263	0.000192412	0.00142419		0.000527489	7.77935e-05	0.00036712	9.87546e-05	0.00014508	2.73851e-05	0.000149982	1.3782e-05	0.000146588	2.88339e-05	8.68821e-05	1.98263e-05	0.000305856	0.000206557	0.00149406		0.000482227		0.00173899		0.002212		6.63762e-05	2.47867e-05	5.02084e-05
129.127	C8H16OH	unknown	0.00817136	0.00449216	0.0102919	0.00490574	0.00840167	0.0050338	0.023113	0.0268065	0.0127469	0.010048	0.000113888	7.46342e-05	0.000430399		0.000141022	1.25725e-05	0.000207977	8.52527e-05	2.26179e-05	1.9504e-06	2.55251e-05	6.39416e-06	3.46519e-05	1.73416e-05	2.31553e-05	9.71215e-06	0.000253832	0.000173015	0.000839651		0.000492838		0.000513977		0.0016008		6.80585e-05	5.35013e-05	2.68389e-05
129.164	C9H20H	unknown	0.00229938	0.00197272	0.00261898	0.00195022	0.00259948	0.00268419	0.00475186	0.00219698	0.000986402	0.000662061	0.000798263	0.000179674	0.00241004		0.00101792	0.000361344	0.0011907	0.000491532	0.000278425	2.86053e-05	0.000377322	0.000145595	0.000248796	7.62194e-05	0.000210706	9.17532e-05	0.000983872	0.000631082	0.00305107		0.000273164		0.00164921		0.0013183		0.000493554	0.000533917	0.00019214
130.013	C4H3NO4H	unknown	0.000343723	0.000106755	0.0004003	0.000176267	0.000329393	0.00015364	0.000594866	0.000393428	0.000557784	0.000450116	0.0059986	9.89033e-05	0.017701		0.00560235	0.00118783	0.00400678	0.00205448	0.0019397	0.000413313	0.00244785	0.000218052	0.00165051	9.33386e-05	0.00104841	9.70026e-05	0.00538201	0.0034565	0.0366514		0.0228858		0.00897674		0.0336094		0.00496014	0.0039798	0.00127671
130.05	C5H7NO3H	unknown	0.00208567	0.00121229	0.0026238	0.000891724	0.00229124	0.00131234	0.0047366	0.00422684	0.00441843	0.00332523	0.00169557	0.00152917	0.00708135		0.000916815	0.000416474	0.00135859	0.000580263	0.000550591	0.000172614	0.000699603	3.09766e-05	0.000550687	0.0003582	0.00042885	0.0001493	0.00460839	0.00339805	0.0295623		0.0198033		0.00145847		0.0294005		0.00215829	0.00182767	0.000514001
130.065	C9H8N	unknown	0.00419929	0.00407523	0.00374895	0.00195555	0.00458131	0.004805	0.00964472	0.00988484	0.00910498	0.00915128	0.000408632	9.97637e-05	0.00151754		0.000453914	2.1957e-05	0.000452798	0.000256259	0.000150126	3.79838e-05	0.000191346	6.59486e-05	0.000150718	5.51512e-05	0.000105513	4.20144e-05	0.000527157	0.000297162	0.00124513		0.000565554		0.00213888		0.0012524		0.000318338	0.000320724	8.08686e-05
130.123	C7H15NOH	unknown	0.00033931	0.000238861	0.000406097	0.000120413	0.000299576	0.000152222	0.00215241	0.00372987	0.00181356	0.00191032	0.000885071	7.43486e-05	0.00274177		0.00109943	9.49331e-05	0.00116376	0.000593932	0.000392516	0.000110595	0.000495104	4.15146e-05	0.000364812	5.45497e-05	0.000311084	0.00014019	0.00148251	0.00110159	0.00396574		0.00264685		0.00565335		0.00573382		0.00055686	0.000545673	0.000239858
131.034	C5H6O4H	unknown	0.0124689	0.00478572	0.0145092	0.00614723	0.0149131	0.0114889	0.0164823	0.00903852	0.0120175	0.0070462	0.00329479	0.000120855	0.0132808		0.00396316	0.000294963	0.00494462	0.00256836	0.00103767	0.0002597	0.00143876	0.000159062	0.00130343	0.000251107	0.00092048	0.000223706	0.00357174	0.00175356	0.0113118		0.00641833		0.0144317		0.0382379		0.000936067	0.000637732	0.000415082
131.049	C9H6OH	unknown	0.0162642	0.0085108	0.0161884	0.00954712	0.0170993	0.0114933	0.0202011	0.0155759	0.0147702	0.0059469	0.00132592	0.00049641	0.00576492		0.000773973	3.52034e-05	0.000990864	0.000154084	0.000364846	2.83997e-06	0.000349494	2.38352e-05	0.000313112	4.2142e-05	0.000235137	5.67634e-05	0.000506993	0.000109172	0.00208965		0.00083783		0.00350249		0.00504767		0.000466101	0.000354773	0.000219975
131.07	C6H10O3H	unknown	0.0134201	0.00533809	0.0146428	0.00589509	0.0156695	0.0109237	0.0235805	0.0182005	0.014491	0.00843377	0.00229259	0.000186212	0.0043862		0.00118156	8.82821e-05	0.00254848	0.00134406	0.000551692	0.000166737	0.000714692	0.000166116	0.000511563	0.000139907	0.000184899	1.27518e-05	0.00114404	0.000458242	0.0072741		0.00278152		0.00713978		0.0570846		0.000195849	7.70626e-05	7.00073e-05
131.086	C10H10H	Dihydronaphthalene	0.031537	0.0260327	0.0338896	0.0208632	0.0330154	0.0308441	0.0629479	0.0573049	0.0248999	0.0165825	0.0399651	0.00508017	0.0645128		0.0437103	0.0116636	0.0344128	0.0228142	0.00659253	0.00312601	0.00803686	1.59175e-05	0.00478665	0.0010744	0.0030638	0.000722089	0.00966991	0.00666536	0.0605513		0.0208326		0.0904521		0.115942		0.00812055	0.00658079	0.00183903
131.107	C7H14O2H	unknown	0.00444361	0.002154	0.00921201	0.00661753	0.00337885	0.00128459	0.0151938	0.0195308	0.0160417	0.0158982	0.017349	0.00390344	0.0538658		0.00220543	0.000217981	0.00200803	0.00087524	0.000843478	0.000143875	0.000952277	0.000132407	0.000568984	6.87734e-05	0.00026854	9.07846e-05	0.000278808	1.05539e-05	0.00816389		0.00396869		0.00411331		0.0101958		0.0034005	0.00231155	0.000342752
131.143	C8H18OH	unknown	0.000835803	0.00066975	0.00104734	0.000718828	0.00113449	0.000843294	0.00143403	0.00106911	0.000479405	0.000500257	0.00261451	0.000187935	0.00648213		0.00160484	2.19667e-05	0.00275223	0.000947188	0.000740221	0.000250039	0.00102092	4.24501e-05	0.000793968	8.45553e-05	0.000383617	2.29963e-05	0.00190593	0.000984279	0.00917648		0.00585041		0.0076142		0.0689294		0.000318942	0.000148222	0.000249166
131.993	C3HO5NH	unknown	0.000107028	6.75337e-05	0.000138877	4.40414e-05	0.000102347	5.16753e-05	0.000321771	0.000313313	0.00025679	0.000246995	0.00261904	0.000172044	0.0114573		0.00149791	3.66227e-05	0.00201479	0.000663365	0.000416052	8.35845e-05	0.000491897	6.67153e-05	0.000408383	7.36035e-05	0.000245298	7.71671e-05	0.00130605	0.000825221	0.00796333		0.00344905		0.00772055		0.0360328		0.000446531	0.000324439	0.000164582
132.044	C8H5ONH	unknown	0.000900633	0.000510991	0.000933749	0.00034833	0.000921381	0.000652228	0.00110859	0.00061072	0.000971337	0.000579775	0.0311606	0.00112114	0.0591634		0.0293174	0.00593754	0.0298695	0.017722	0.0109969	0.00130285	0.0103937	0.000339592	0.00623808	0.00104773	0.00398236	0.0011202	0.0126051	0.00271385	0.124537		0.0806806		0.0641303		0.163985		0.0182731	0.0150415	0.00261817
132.066	C5H9NO3H	unknown	0.00151464	0.000933487	0.00166254	0.000688965	0.00153559	0.000908155	0.0045136	0.00465744	0.00311387	0.00285585	0.00315274	0.00137292	0.0154854		0.00118598	0.000340911	0.0020206	0.00105401	0.000461867	0.000108185	0.000530279	0.00032079	0.000396647	5.51405e-05	0.000532522	0.000267205	0.000955052	0.000595764	0.0051884		0.00210369		0.0053845		0.000604345		0.00130698	0.000728603	0.00101486
132.081	C9H9NH	MethylBenzeneAcetonitrile	0.00440183	0.00460142	0.00414702	0.00245193	0.00388096	0.00369425	0.0148911	0.0179681	0.00991694	0.0101156	0.0261989	0.00600592	0.111184		0.0124408	0.0022113	0.012147	0.00214892	0.00236946	0.00064576	0.00267452	0.000256031	0.00235718	0.00078253	0.00157529	0.000819398	0.00504687	0.00210747	0.0546237		0.0366377		0.0489994		0.0765483		0.0117674	0.00966516	0.00276122
133.013	C4H4O5H	unknown	0.000643311	0.000246461	0.000964874	0.000346975	0.000460962	0.00023819	0.0010956	0.00068241	0.000880453	0.000570826	0.00157866	0.000575842	0.00541485		0.000850644	5.09696e-05	0.000897447	0.000349556	0.00109242	0.000333023	0.00164779	0.000390086	0.00037545	9.44731e-05	0.000213068	2.43007e-05	0.000637016	0.000244435	0.00465813		0.00195246		0.00127781		0.00177431		0.0011959	0.000908517	0.000282743
133.05	C5H8O4H	unknown	0.0134669	0.0045332	0.0145221	0.00417016	0.0137977	0.00722662	0.0174908	0.0110187	0.0115844	0.00502424	0.00585594	0.00175574	0.0163263		0.00138001	0.000240898	0.00141278	0.000550664	0.00240139	0.00086449	0.00366785	0.000553768	0.000597898	0.000188445	0.00047341	0.000171573	0.00108084	0.000569375	0.00995949		0.00525755		0.00497386		0.0198675		0.00153345	0.000995103	0.00030514
133.065	C9H8OH	Methylbenzofurans	0.0626186	0.0323921	0.0545033	0.0296322	0.0573802	0.0325999	0.0909732	0.0615798	0.0629439	0.0361519	0.00223222	0.000456979	0.0125803		0.00262048	0.000116207	0.0030581	0.00153873	0.000474547	0.000196109	0.000597881	0.000125555	0.000845267	0.000155465	0.000491584	0.000121275	0.00226904	0.00157034	0.0101747		0.00976791		0.0185956		0.116005		0.000238581	0.000126281	0.000261314
133.101	C10H12H	EthylStyrene (~50%), butenyl benzene isomers (~50%), MethylIndane	0.0400867	0.0364265	0.0407907	0.019138	0.0381469	0.0232972	0.0685858	0.0554051	0.0303266	0.0203033	0.0010311	0.000204498	0.00202239		0.000661171	8.65588e-06	0.00121504	0.000522168	0.000264059	0.000111379	0.000325924	2.50203e-06	0.000278769	3.07549e-05	0.000137808	6.42676e-06	0.000686054	0.000450539	0.0047046		0.00201049		0.00335938		0.0413881		6.4375e-05	1.41163e-05	6.89844e-05
134.06	C8H7NOH	unknown	0.00275351	0.00220039	0.00269966	0.00110268	0.00251321	0.00169838	0.00946777	0.0140007	0.00861584	0.00913749	0.00132375	6.21369e-05	0.00377682		0.000523506	4.11058e-05	0.000641323	0.000131108	0.000169031	4.59446e-05	0.00024229	5.51146e-05	0.000141862	2.94805e-05	8.73444e-05	2.47023e-05	0.000414368	0.000254918	0.00206641		0.00120034		0.00233666		0.00211197		8.46104e-05	2.94562e-05	4.98556e-05
134.096	C9H11NH	unknown	0.00079697	0.000900384	0.000760692	0.000578691	0.000810063	0.000781363	0.0034193	0.00448522	0.00154678	0.00140812	0.0360974	0.00545958	0.0989306		0.0324511	0.00656214	0.0470663	0.0128234	0.0160651	0.000812016	0.0135102	0.00289413	0.0126115	0.00184137	0.00851902	0.00321755	0.0198436	0.0036907	0.224278		0.20517		0.0341823		0.212022		0.0468995	0.0400449	0.00771649
134.154	C7H19NOH	unknown	0.000258644	0.000205273	0.000307082	0.000156054	0.000284685	0.000254696	0.000875171	0.00116715	0.000338798	0.000268746	0.0302728	0.00228578	0.0970004		0.0134641	0.00273743	0.0114783	0.0058252	0.00450113	0.00205578	0.00582401	0.000505204	0.00264806	0.000615516	0.00192356	0.000473512	0.00677907	0.00405344	0.0800746		0.0269166		0.0402327		0.0589393		0.0115026	0.00815847	0.00322805
135.029	C4H6O5H	unknown	0.0019143	0.000905865	0.00224064	0.00074231	0.00193694	0.000840448	0.00318093	0.00225439	0.00193199	0.00115821	0.00342067	0.000631814	0.0111635		0.00302746	0.000537504	0.00415654	0.000903024	0.000782122	4.61924e-05	0.000665923	0.000147147	0.000802877	0.000255862	0.000558222	0.00032215	0.00187308	0.000558841	0.0185055		0.0157119		0.0201123		0.024379		0.00342895	0.00292352	0.000677164
135.044	C8H6O2H	unknown	0.0261479	0.0111537	0.0249329	0.0108308	0.0277325	0.0150142	0.038674	0.0242929	0.027912	0.0166171	0.000455507	0.000128992	0.00370934		0.00396053	0.000798406	0.00407354	0.00214215	0.000514252	0.000215759	0.000600172	5.97975e-05	0.00142561	0.000280641	0.00139841	0.000547543	0.00181697	0.00104861	0.00489674		0.00180428		0.0032245		0.0105657		0.000232076	0.000178815	0.000539211
135.08	C9H10OH	chavicol, methyl acetophenone, ethenyl methoxy benzene	0.051711	0.034828	0.0526887	0.0312935	0.0423867	0.0244122	0.0674097	0.0485438	0.0457638	0.027913	0.00175635	6.78276e-05	0.00792248		0.00101803	7.04297e-05	0.0014362	0.000624063	0.000422036	0.000114994	0.000538805	4.43416e-05	0.000348733	0.000101082	0.000201538	3.52114e-05	0.00116779	0.000722652	0.00650175		0.00444045		0.00801982		0.0407375		0.000114473	5.5493e-05	0.000201571
135.117	C10H14H	C10 aromatics (92%), fragments on this mass subtracted	0.0452719	0.0404085	0.0429471	0.0216677	0.0544644	0.0449779	0.107212	0.0973595	0.0338056	0.0193578	0.00044145	6.76957e-05	0.00128416		0.000295475	2.79114e-06	0.000431127	0.000187253	7.32782e-05	2.03618e-05	8.06658e-05	1.17784e-05	7.25497e-05	1.65123e-05	4.07893e-05	3.6309e-06	0.00022038	0.000172586	0.0017115		0.000917607		0.00104971		0.011833		3.05842e-05	1.02046e-05	3.0312e-05
136.039	C7H5O2NH	unknown	0.00277493	0.00147341	0.00234837	0.00110339	0.00336364	0.00421229	0.00322107	0.00243354	0.00443236	0.00354951	0.000217021	2.33441e-05	0.00095306		0.000233957	1.78979e-05	0.000297599	9.6849e-05	5.72986e-05	1.11174e-05	6.6519e-05	7.42593e-06	6.75185e-05	7.29505e-06	5.86586e-05	2.66719e-05	0.000171772	0.000101782	0.000858431		0.000463125		0.000886767		0.00454563		4.94887e-05	3.09323e-05	5.45923e-05
136.06	C4H9NO4H	unknown	0.00553019	0.00317644	0.00473474	0.00300114	0.00604836	0.00774262	0.00677464	0.00504404	0.00861213	0.00675225	0.0073514	0.00361314	0.0264797		0.0105605	0.00271918	0.00613699	0.00422197	0.00110824	0.000149551	0.000958094	0.000482069	0.000859649	0.000499287	0.000573357	0.0004702	0.00249525	0.00156996	0.0204655		0.0156712		0.0178039		0.0267789		0.00402115	0.0036423	0.000570091
136.076	C8H9NOH	unknown	0.00184661	0.00150993	0.00206936	0.000545783	0.00181212	0.00152044	0.0109845	0.0169531	0.00784901	0.00884492	0.0124713	0.00296402	0.0492079		0.00730329	0.00176482	0.00758725	0.00293556	0.00119023	0.000316772	0.00141805	0.000427473	0.00151942	0.00107613	0.00116334	0.00108511	0.00430885	0.00220836	0.0425569		0.0186593		0.0170991		0.0403645		0.00814517	0.00615884	0.00220852
136.112	C9H13NH	unknown	0.00155286	0.00166799	0.00142079	0.000924674	0.0021799	0.00209268	0.00886387	0.0109819	0.00390933	0.00368902	0.00134159	0.000408415	0.00495618		0.0050551	0.00153854	0.00461812	0.00167995	0.000792719	0.000286283	0.000950722	0.000134355	0.00117138	0.000305671	0.00107385	0.000570953	0.0017603	0.000699307	0.00693957		0.00228936		0.00351804		0.00541393		0.000895135	0.000630327	0.000986206
137.006	C7H4OSH	unknown	0.00146022	0.000608259	0.0014861	0.000398667	0.00132337	0.00108282	0.00204685	0.00130445	0.0022693	0.00155168	0.000235495	5.45534e-06	0.000956769		0.000297692	6.24776e-05	0.000377948	0.000110543	6.80017e-05	1.13503e-05	7.83086e-05	2.62662e-05	9.02965e-05	3.16882e-05	9.46707e-05	4.32428e-05	0.000234147	0.000142368	0.000867482		0.000426179		0.000349082		0.000922776		0.000175191	0.000169791	0.000147453
137.023	C7H4O3H	unknown	0.00308836	0.00139504	0.00284606	0.00151083	0.00480119	0.00688431	0.00370401	0.00286517	0.00405717	0.00305346	0.00118652	5.0029e-05	0.00564273		0.00230782	0.000342538	0.00237163	0.000981454	0.000612429	0.000168913	0.000751137	5.81123e-05	0.000850603	0.000108195	0.000626034	0.000224438	0.00142372	0.000853412	0.00635827		0.0035403		0.00382197		0.0151174		0.000352072	0.000224595	0.000476354
137.06	C8H8O2H	Methylbenzoicacid	0.0984156	0.036612	0.0813887	0.0299314	0.109624	0.0832364	0.133823	0.0995401	0.136975	0.0764915	0.000867431	8.7543e-05	0.00273746		0.00452915	0.000276678	0.00686803	0.0040906	0.0010773	0.000363985	0.0014316	0.000216133	0.00136472	5.17353e-05	0.000751249	0.000236063	0.00335116	0.00207332	0.00773161		0.00190703		0.00952907		0.0305473		0.000116459	9.33246e-06	0.000264294
137.096	C9H12OH	unknown	0.0393236	0.0162455	0.0358241	0.0122914	0.0356722	0.0155349	0.0878897	0.0790124	0.0698156	0.0524309	0.000322585	2.42889e-05	0.00125531		0.000203325	2.57565e-05	0.000347124	0.000165601	5.03755e-05	9.63767e-06	5.91992e-05	1.07894e-05	5.67552e-05	2.17439e-05	3.39023e-05	9.30567e-06	0.000210312	0.000142075	0.00113805		0.000492645		0.00208667		0.00730997		3.29704e-05	1.71653e-05	3.66715e-05
137.132	C10H16H	monoterpenes	1.23621	1.56235	0.873623	0.723006	2.00739	1.93229	3.67783	4.72749	0.297979	0.0693274	0.0108326	0.00267043	0.0510364		0.00742218	0.00230782	0.00510501	0.00166841	0.00225086	0.000451408	0.00317917	0.00123566	0.00211893	0.00038097	0.00193969	0.000596237	0.00701098	0.00553702	0.0255589		0.0156859		0.0248196		0.0171763		0.00553897	0.00448281	0.00348491
138.019	C6H3O3NH	unknown	0.000652285	0.00033013	0.000701521	0.000301734	0.000669009	0.000430073	0.00100177	0.000713447	0.00119508	0.0011072	0.00589319	0.00123831	0.0120538		0.018116	0.00404291	0.0223917	0.00524049	0.00611784	0.00130684	0.00627139	0.000207118	0.00900923	0.00153212	0.00724631	0.00186128	0.0343661	0.0300569	0.026542		0.00803124		0.00587415		0.0199952		0.00483004	0.00342428	0.0041947
138.055	C7H7NO2H	nitrotoluene	0.00575605	0.00209444	0.00594201	0.00214643	0.00859489	0.0107702	0.0152262	0.0181522	0.0227837	0.023719	0.0206447	0.00278691	0.0581908		0.00767912	0.00178588	0.00904661	0.00333756	0.00372851	0.00114647	0.00422949	0.00066578	0.00289047	0.000454852	0.00187365	0.00034694	0.00505235	0.00228009	0.0450684		0.0289955		0.0078088		0.0386505		0.00855325	0.0067878	0.00423503
138.076	C4H11NO4H	unknown	0.00513167	0.0019248	0.00446442	0.00161759	0.00798966	0.0121749	0.00670645	0.00480775	0.010794	0.00777587	0.0117814	0.00318571	0.0346456		0.00242953	5.60839e-05	0.00216057	0.000474968	0.000911296	0.000320824	0.000760762	5.01155e-05	0.00103772	0.000163724	0.000681419	0.000147713	0.00243617	0.002	0.0136032		0.00498426		0.0201635		0.0305322		0.00439537	0.00411577	0.000638804
138.091	C8H11NOH	unknown	0.00145805	0.00150292	0.00182845	0.00122925	0.00122789	0.00110451	0.00619955	0.00845975	0.00353971	0.00358982	0.000642766	0.000659299	0.0035346		0.0012224	0.000301032	0.0015288	0.000338103	0.000124097	1.46368e-06	0.000127158	4.72143e-05	0.000314701	0.000177931	0.000256697	0.000184439	0.00176102	0.00136168	0.00445559		0.00230175		0.000988966		0.00255668		0.000653744	0.000463631	0.000432005
139.021	C7H6OSH	unknown	0.00376494	0.00257192	0.00388128	0.0014042	0.00406638	0.00332209	0.00483987	0.00317335	0.00700888	0.00427554	9.14857e-05	9.4628e-06	0.000261576		0.000107626	2.09262e-05	0.000151039	4.94489e-05	2.89276e-05	1.4139e-06	3.26491e-05	7.83505e-06	3.10407e-05	1.14887e-05	3.14341e-05	1.7141e-05	0.000109856	7.61166e-05	0.000350902		0.00012967		0.000198941		0.000468856		4.05045e-05	3.51559e-05	2.53126e-05
139.039	C7H6O3H	unknown	0.047148	0.0210054	0.0383028	0.0145562	0.0403996	0.0309163	0.0392287	0.0284744	0.0283605	0.0184223	0.000348336	6.2861e-05	0.00121831		0.00111714	3.06667e-05	0.00108768	0.000609972	0.000235752	6.12983e-05	0.000277535	4.20447e-05	0.000338679	5.99317e-05	0.000231494	7.63085e-05	0.00205528	0.00170864	0.00178035		0.000786725		0.00067968		0.00220945		0.000205429	0.000169553	0.000121062
139.075	C8H10O2H	methylguiacol (creosol)	0.357806	0.1845	0.262217	0.0768649	0.700783	1.19737	0.544234	0.33843	0.529691	0.335149	0.00111089	1.05657e-05	0.00431601		0.00135141	8.49827e-05	0.00155613	0.000729376	0.00043142	0.000100024	0.000532887	1.13875e-05	0.000390238	3.56274e-05	0.000304207	8.60394e-05	0.00428307	0.00393713	0.00488054		0.00284504		0.0036955		0.0121198		0.000405508	0.000322446	0.000165212
139.112	C9H14OH	unknown	0.0117521	0.0112679	0.019252	0.00997831	0.0151905	0.0135887	0.0469138	0.0438086	0.0135548	0.0101836	0.000393514	6.5897e-05	0.00172011		0.000723617	0.000229517	0.00075724	0.000295424	0.000100255	1.71779e-06	0.000137459	7.8259e-05	0.000114046	7.00361e-05	0.000148255	9.74062e-05	0.00128644	0.00128566	0.00204443		0.000499563		0.000446177		0.000794477		0.00029858	0.000359326	0.000373133
139.148	C10H18H	unknown	0.0136704	0.00810007	0.0129516	0.00604544	0.0142787	0.0109431	0.0297343	0.0242164	0.0193285	0.0130801	0.010669	0.000332453	0.0299916		0.00926612	0.00204111	0.00661656	0.00223937	0.00371302	0.00122591	0.00505154	0.00120705	0.00312156	0.000427735	0.00243812	0.000580691	0.0110074	0.00936917	0.0406852		0.0256689		0.00748884		0.0373643		0.00777691	0.00574392	0.00279698
140.049	C10H5NH	unknown	0.00183309	0.000813706	0.00202908	0.00100557	0.0011344	0.000639737	0.0046412	0.00395529	0.00470874	0.0046264	0.00239107	5.95805e-05	0.0069875		0.00159111	8.47631e-05	0.00210846	0.00143873	0.000517019	0.000208435	0.000786053	4.67281e-05	0.000512466	8.97425e-05	0.000247052	4.05582e-05	0.000525266	5.72543e-05	0.00570459		0.0029115		0.00948116		0.0337801		0.000285671	0.000195366	0.000123374
140.071	C7H9NO2H	unknown	0.00183215	0.00155064	0.00281376	0.00120997	0.00183135	0.00145494	0.012324	0.0206856	0.0140642	0.0169098	0.000587196	2.97731e-05	0.00125414		0.000817761	1.25069e-05	0.00108065	0.000652264	0.000162888	3.8411e-05	0.000220386	4.79922e-05	0.000172373	4.71208e-05	7.14848e-05	5.88749e-06	9.53952e-05	8.00535e-05	0.00223084		0.00101851		0.00118814		0.0143776		0.000102855	5.78135e-05	3.79063e-05
140.107	C8H13NOH	unknown	0.000542976	0.000693666	0.00074664	0.000625134	0.000512461	0.000551197	0.00347789	0.00595936	0.00133882	0.00168199	0.000247119	0.000146656	0.00101319		0.000340919	4.70235e-05	0.000342403	0.000162989	4.49334e-05	7.14468e-06	5.49892e-05	5.99662e-06	5.75755e-05	2.31899e-05	3.52431e-05	1.53846e-05	0.00121744	0.001154	0.00098012		0.000450734		0.000940644		0.00278116		0.000108154	7.44882e-05	4.46075e-05
140.143	C9H17NH	unknown	0.00029036	0.000230024	0.000329796	0.00020897	0.000198554	0.00013033	0.00231889	0.00447564	0.00152384	0.00197174	0.0016512	0.000190924	0.00496648		0.00189493	0.000363592	0.00159284	0.000344653	0.000449581	7.17623e-05	0.000516672	2.13301e-05	0.000482208	5.75675e-05	0.000416385	0.000130415	0.00134139	0.000802534	0.00503546		0.0032039		0.00365071		0.00468374		0.00112632	0.000805823	0.000581962
140.97	C5H3NS2	unknown	0.000461314	0.000199485	0.000550747	0.0002722	0.000415575	0.000306588	0.000718912	0.000542956	0.000956604	0.00068627	0.0192571	0.00480112	0.0498016		0.0200949	0.00318394	0.0202164	0.0104448	0.00935816	0.002809	0.0107481	0.000732479	0.00682391	0.000907689	0.00500079	0.00158271	0.0201135	0.0125393	0.047635		0.0280618		0.027635		0.0458321		0.011121	0.00852097	0.00383057
141.018	C6H4O4H	unknown	0.00336167	0.00199545	0.00365864	0.00185303	0.00447864	0.00374592	0.00301154	0.00148635	0.00297923	0.00171867	0.0024935	0.000281012	0.00744134		0.00135898	6.4981e-05	0.001279	0.000427464	0.00033458	9.23958e-05	0.000417954	7.44741e-05	0.000355544	7.48578e-05	0.000237285	6.65202e-05	0.000671467	0.000316132	0.00667605		0.00551859		0.0028136		0.0169696		0.00105863	0.000806081	0.00028934
141.055	C7H8O3H	unknown	0.0507629	0.0188042	0.0424692	0.0158856	0.0590314	0.0600379	0.0686499	0.0461171	0.0741165	0.0570946	0.00572405	0.000882621	0.0142238		0.002556	0.000332947	0.00240114	0.000353188	0.000601847	0.000105787	0.000707776	0.000148987	0.000593687	8.46086e-05	0.000404136	9.40484e-05	0.00105255	0.000547971	0.0152212		0.0127303		0.00381394		0.0386119		0.00190423	0.00145179	0.000399236
141.091	C8H12O2H	unknown	0.0158324	0.00638401	0.0161357	0.00470564	0.0126036	0.00773988	0.040184	0.0329002	0.0244782	0.0148524	0.00147301	2.84375e-05	0.00612015		0.00174332	5.94122e-05	0.00257676	0.00154614	0.000520196	0.000180015	0.000703125	2.43936e-05	0.00054529	0.000120493	0.00029722	5.56659e-05	0.00168986	0.000994181	0.00541057		0.00194029		0.00650391		0.0322354		0.000148558	8.34646e-05	0.000140811
141.127	C9H16OH	unknown	0.00622971	0.00257716	0.00977352	0.00421405	0.00686974	0.00340384	0.0188502	0.0171753	0.0133547	0.0122143	0.00121736	0.000184963	0.00211844		0.00234601	0.000239327	0.00111607	0.000565509	0.000214285	5.87637e-05	0.000256133	4.65298e-05	0.000200241	5.47156e-05	8.96664e-05	1.65331e-05	0.00040727	0.000224909	0.00289938		0.00117364		0.00275087		0.0242865		0.000152224	7.2977e-05	5.30218e-05
141.164	C10H20H	unknown	0.00232801	0.00126343	0.00265223	0.00109485	0.0021604	0.000950385	0.00687574	0.00641161	0.00498368	0.00417408	0.00117811	3.59765e-05	0.00340506		0.000730752	0.000197174	0.00108196	0.000228694	0.000200643	1.05311e-05	0.000209302	7.07827e-05	0.000189431	3.29992e-05	0.000171823	7.45798e-05	0.000558988	0.000232077	0.00284157		0.0017092		0.00129443		0.00234301		0.000689753	0.000579502	0.00019528
142.05	C6H7NO3H	unknown	0.00155946	0.000822736	0.00171167	0.000446385	0.00187608	0.00103321	0.00347817	0.0032824	0.00355986	0.00338227	0.00354904	0.00179298	0.0117278		0.00143559	0.000128705	0.00243908	0.00126413	0.000829564	0.000183579	0.00108821	0.000383427	0.000766027	0.000318063	0.000559913	0.000207709	0.00260992	0.00147806	0.00389214		0.00277981		0.00181972		0.00541702		0.00166205	0.0018027	0.000303969
142.086	C7H11NO2H	unknown	0.000655722	0.000422661	0.000771815	0.000350496	0.000449275	0.000193515	0.00345149	0.00533897	0.0030192	0.00323304	0.0456932	0.00795015	0.117156		0.0250075	0.00427922	0.0361141	0.017407	0.0105676	0.000455032	0.0105948	0.000909378	0.00608368	0.0010139	0.00396134	0.00114188	0.0125362	0.00144579	0.118563		0.0621286		0.0701389		0.165671		0.0190746	0.0135931	0.00528581
142.123	C8H15NOH	unknown	0.000220757	0.000164306	0.000281654	0.000132809	0.00022042	9.95771e-05	0.00137208	0.00217227	0.000977809	0.000988542	0.000351096	7.36724e-05	0.00110841		0.00044418	2.1553e-05	0.000486099	0.000175842	0.000341108	5.88892e-05	0.000512911	0.000211298	0.000196113	7.60498e-05	0.000159251	2.49545e-05	0.000312311	0.000144372	0.00152183		0.00111238		0.000929383		0.00229131		0.000307738	0.000274893	0.000127605
142.935	CH3IH	unknown	0.000179197	8.11739e-05	0.000258246	0.000128611	0.000153614	0.000141753	0.000319012	0.000259147	0.00038061	0.000256193	0.00760307	0.00208322	0.0250536		0.00181395	0.000257732	0.0015936	3.1467e-05	0.000544708	5.37285e-05	0.000633145	6.77055e-05	0.000475125	0.000139702	0.000349402	8.71678e-05	0.00069252	0.000196195	0.00634059		0.00353672		0.00274233		0.0133754		0.00155589	0.00127333	0.000651573
143.034	C6H6O4H	unknown	0.0329338	0.014841	0.0344365	0.0166889	0.076205	0.122526	0.0375021	0.0184673	0.032432	0.017745	0.00218498	0.000197024	0.00128291		0.000658679	0.00016714	0.00156752	0.000364446	0.000369131	0.00014162	0.000484658	1.33687e-05	0.000372273	3.5811e-05	0.000186252	2.08318e-05	0.000856974	0.000409853	0.00481932		0.00295922		0.00287419		0.0392091		0.00012906	4.49473e-05	0.000107679
143.07	C7H10O3H	unknown	0.0353401	0.01391	0.0298834	0.01076	0.0363359	0.0320739	0.0690538	0.0596801	0.0683171	0.0511476	0.00388157	0.00142917	0.0125428		0.00140321	0.000147173	0.00192861	7.11946e-05	0.000659575	5.35093e-07	0.000738997	0.000123588	0.000554617	3.92018e-05	0.000524934	0.000169045	0.000977993	0.000458106	0.00689514		0.00369647		0.00305067		0.00509923		0.00207108	0.00179416	0.00101435
143.086	C11H10H	Methyl naphthalene	0.0361369	0.0285814	0.0366658	0.0238296	0.0345129	0.0349811	0.0675045	0.0627137	0.0267645	0.0171676	0.0165571	0.00309132	0.0764828		0.0212676	0.00256055	0.0199304	0.00850437	0.00881699	0.00314832	0.01263	0.00317255	0.00675845	0.00213787	0.00505967	0.00153691	0.0127066	0.00520642	0.0930365		0.0652969		0.0220189		0.0521581		0.0248959	0.0209118	0.00709285
143.107	C8H14O2H	unknown	0.00580854	0.00321492	0.0111789	0.00589488	0.00780506	0.00415419	0.0173037	0.0143196	0.0112231	0.00858781	0.0130824	0.001261	0.0215609		0.0172187	0.00418082	0.0233273	0.0173437	0.00454783	0.00112998	0.00428905	0.00012077	0.00275407	0.000491686	0.00184112	0.000352552	0.00542443	0.00259479	0.0506727		0.0266955		0.0464968		0.0831367		0.00745113	0.0070752	0.000801956
143.143	C9H18OH	unknown	0.00322218	0.00162342	0.0042493	0.00220006	0.0032916	0.00226694	0.0107874	0.013458	0.00743033	0.00659806	0.0194419	0.00567063	0.084533		0.00632314	0.00108292	0.00639711	0.000252736	0.00128109	0.000268889	0.00152602	0.000268861	0.00132841	0.000472701	0.000999406	0.000560426	0.00274357	0.000857096	0.0300713		0.0181159		0.0228596		0.0444805		0.00824757	0.00652197	0.00283071
143.179	C10H22H	unknown	0.00178902	0.00143277	0.00216001	0.0012982	0.00177212	0.0017942	0.00472708	0.00346213	0.00148102	0.00120503	0.0031186	0.000956919	0.00664927		0.000878104	9.47771e-05	0.00281144	0.000198052	0.00359236	0.000571538	0.00362795	0.000511422	0.00229207	0.000385611	0.00140362	0.000278265	0.00187224	6.76569e-05	0.0191207		0.0065441		0.00411487		0.0224744		0.00593743	0.00424399	0.000332621
144.044	C9H5ONH	unknown	0.00100467	0.000459956	0.00109681	0.00033253	0.0010101	0.000501992	0.00151613	0.00115612	0.00230259	0.00191563	0.00233899	0.000540907	0.00659028		0.00163457	8.34333e-05	0.00159606	0.000935251	0.000254465	0.000123327	0.00033374	2.61805e-05	0.000336083	5.42495e-05	0.00018722	6.25179e-05	0.000946475	0.000732494	0.00683229		0.00687964		0.00852861		0.0670667		6.27279e-05	2.8058e-05	0.000124069
144.066	C6H9NO3H	unknown	0.00275245	0.00173349	0.00287664	0.000953308	0.0029132	0.00162991	0.00615968	0.00548707	0.00719129	0.00581028	0.000744461	0.000203656	0.00143596		0.000382389	3.23902e-07	0.000415511	0.000203479	9.58772e-05	4.11737e-05	0.000122019	5.86329e-06	0.000101733	1.82811e-05	5.33672e-05	8.61118e-06	0.000278109	0.000198218	0.00193024		0.000817831		0.00388433		0.0204546		3.76483e-05	8.73647e-06	2.6184e-05
144.081	C10H9NH	unknown	0.001978	0.00200788	0.00186185	0.0010765	0.00188103	0.00168028	0.00512788	0.00549308	0.0036714	0.00348023	0.00023599	5.19244e-05	0.000957466		0.000230767	3.99945e-06	0.000304773	9.00151e-05	0.000119337	1.64404e-05	0.000116864	2.28795e-05	0.000101548	1.77923e-05	6.63983e-05	1.52385e-05	0.000220968	3.82442e-05	0.00147369		0.000922381		0.00322727		0.00968011		0.000212325	0.000146271	4.58474e-05
144.138	C8H17NOH	unknown	0.000198934	0.000109509	0.000260912	8.50903e-05	0.000195729	9.83336e-05	0.00128871	0.00218782	0.00110086	0.00109616	0.000445194	6.39019e-05	0.000970307		0.000156656	2.5974e-05	0.000406604	1.29192e-05	0.000140939	1.56041e-05	0.000176468	0.000115319	0.000113744	6.23443e-05	0.000128885	6.94641e-05	0.00020474	8.09415e-05	0.001569		0.000493014		0.000412896		0.00094993		0.000465147	0.00049434	0.000100029
144.175	C9H21NH	unknown	0.000204366	0.000151772	0.00024244	0.000108693	0.000213482	0.00014802	0.000558198	0.000530147	0.000342989	0.000339376	0.00207303	0.000874802	0.0110549		0.00182313	0.000195886	0.00129917	0.0010636	0.000589449	1.05611e-05	0.00123481	0.000960432	0.000204143	0.000201607	0.000384585	0.000334733	0.00137571	0.0011359	0.00775326		0.00230605		0.000751417		0.00306705		0.00124437	0.0014265	0.000892319
145.05	C6H8O4H	Levoglucosan pyrolysis product	0.172852	0.0811887	0.156973	0.0655345	0.242871	0.325132	0.157504	0.0924766	0.192105	0.117842	0.0537569	0.0109185	0.129999		0.0197996	0.00345736	0.0277604	0.00636402	0.0247335	0.00491433	0.029236	0.00549065	0.0166708	0.00352574	0.0121573	0.00305723	0.0186894	0.00270487	0.182649		0.0893282		0.0688453		0.186031		0.0601822	0.0454273	0.00702407
145.065	C10H8OH	2-ethenyl benzofuran	0.0235938	0.0177383	0.0248004	0.0169285	0.0224299	0.0217771	0.0330233	0.0368314	0.0166309	0.00889453	0.0162613	0.00194915	0.0366644		0.0118548	0.00249311	0.0153697	0.00543387	0.00518877	0.000806647	0.0044623	0.000820061	0.00356123	0.000615327	0.00238991	0.000852078	0.00621197	0.00163745	0.0663739		0.0566926		0.0183472		0.0724341		0.010731	0.00929901	0.0022056
145.101	C11H12H	ethylindene	0.0156465	0.0163511	0.0169864	0.0125289	0.0141108	0.0145711	0.0404557	0.0363212	0.0152922	0.0106753	0.00978836	0.00135336	0.0241665		0.00516979	0.00104483	0.00469758	0.0024081	0.00208157	0.000761578	0.00229614	0.000297072	0.00148655	0.00030931	0.00109494	0.000323525	0.00275037	0.00141679	0.0250742		0.0078334		0.024341		0.028827		0.00601269	0.00503644	0.000773175
145.122	C8H16O2H	unknown	0.0124414	0.00453859	0.0181047	0.0110276	0.00993986	0.00420204	0.0258826	0.0245703	0.0269219	0.022898	0.00316778	0.000305383	0.00891896		0.00203165	0.000412172	0.00261998	0.000699073	0.000721309	0.000150232	0.000742752	9.99358e-05	0.000650032	0.000133615	0.000461666	0.000178201	0.00124768	0.000400584	0.0115334		0.00745926		0.0199368		0.0185419		0.00211504	0.00169262	0.000391595
145.159	C9H20OH	unknown	0.00273786	0.00235735	0.00298075	0.00200984	0.0038293	0.00379513	0.00453344	0.00380831	0.00118578	0.000566499	0.00101989	0.000204529	0.00473742		0.00143819	1.51957e-05	0.00127932	0.000727144	0.000394973	0.000186918	0.000531862	3.11955e-06	0.000363355	9.48138e-05	0.000319925	0.000140965	0.00101729	0.0006857	0.00371473		0.00208635		0.00256541		0.0119225		0.000302522	0.000223244	0.000233549
146.096	C10H11NH	unknown	0.00201122	0.00184368	0.00197615	0.000981185	0.0014696	0.00138269	0.00804243	0.0110745	0.00673245	0.0073107	0.00088692	3.21787e-05	0.00284071		0.000277467	1.60276e-05	0.000536208	0.000180302	0.0001475	3.1624e-05	0.000176879	3.47798e-05	0.000153009	5.3643e-05	8.51937e-05	8.82883e-06	0.000353116	0.000199054	0.00337311		0.00154769		0.00276765		0.0152977		8.64042e-05	5.296e-05	6.90754e-05
147.029	C5H6O5H	unknown	0.00150897	0.000510665	0.00195168	0.000736905	0.00147441	0.000482809	0.00265664	0.00175971	0.00211654	0.00126207	0.000252508	1.8208e-05	0.000881579		0.000138214	4.51383e-06	0.000215769	0.000107125	4.47542e-05	5.15269e-06	4.47455e-05	4.44175e-06	4.03508e-05	6.4757e-06	2.8252e-05	8.48269e-06	0.000114508	8.55946e-05	0.000800288		0.000462906		0.00060452		0.00639464		3.09313e-05	1.89894e-05	2.66085e-05
147.044	C9H6O2H	unknown	0.0148955	0.00564135	0.0142895	0.00561644	0.0147642	0.00754891	0.0175368	0.00974745	0.0152674	0.0082188	0.000189478	6.30016e-05	0.000263292		7.35036e-05	2.25918e-05	0.00015819	1.77363e-05	3.7175e-05	3.12851e-06	4.35369e-05	2.53171e-05	3.11976e-05	1.23495e-05	3.4009e-05	1.9926e-05	5.74976e-05	4.09205e-05	0.000395238		0.000107666		0.000200014		0.000244454		8.66658e-05	7.86027e-05	3.29698e-05
147.065	C6H10O4H	unknown	0.00929376	0.00314305	0.0107278	0.00502197	0.00897281	0.00444769	0.0166015	0.0132978	0.0180191	0.0119884	0.0504955	0.0176705	0.145757		0.0108856	0.00195084	0.00847763	0.00466782	0.00926896	0.00521366	0.0105763	0.000942325	0.00264997	0.00099212	0.00263778	0.00128534	0.00832719	0.00570714	0.0526124		0.0308027		0.0124399		0.0424488		0.0132266	0.00907797	0.0064842
147.08	C10H10OH	dimethylbenzofuran, ethyl benzofuran	0.0465842	0.0236704	0.0427821	0.0179244	0.0402803	0.0196141	0.0801911	0.0592461	0.0615902	0.0401084	0.038832	0.00604953	0.115724		0.0133186	0.0024967	0.0177087	0.00295257	0.00602629	0.00115445	0.00666507	0.00150721	0.00519129	0.000789371	0.00365403	0.000834411	0.00795197	0.00236545	0.093217		0.0757714		0.0217425		0.115033		0.02537	0.0202471	0.00542004
147.117	C11H14H	unknown	0.0105992	0.00979652	0.0128882	0.00641056	0.00881509	0.00638393	0.0248716	0.0215385	0.012166	0.00931887	0.0107058	0.00135864	0.032562		0.00632464	0.00123301	0.00342974	0.00209384	0.00209173	0.000949778	0.00209684	7.69078e-05	0.00145999	0.000371534	0.000904407	0.000114585	0.00279656	0.00211725	0.0216912		0.00791601		0.0141016		0.0212798		0.00365039	0.00304913	0.000796437
148.039	C8H5NO2H	unknown	0.00168839	0.000775192	0.00171956	0.000383117	0.00178813	0.0010062	0.00268029	0.00253406	0.00470324	0.00416594	0.00420849	0.000674026	0.016877		0.00234442	0.000604216	0.002459	0.000953433	0.000372351	8.28762e-05	0.000339312	0.000157097	0.000449199	0.000230197	0.000355013	0.000210576	0.00134346	0.000681433	0.0135184		0.00686065		0.0139877		0.0162372		0.0023622	0.00194237	0.000630205
148.076	C9H9NOH	unknown	0.00251124	0.00217323	0.00219127	0.000911016	0.00179513	0.00125091	0.00800448	0.0107754	0.00737472	0.00755355	0.00152785	0.000424181	0.00510286		0.00291123	0.000721064	0.00269757	0.0013566	0.000523383	0.000164456	0.000605026	5.79366e-05	0.000473839	9.59808e-05	0.000348338	0.000117467	0.000929331	0.000312623	0.00689183		0.00244385		0.00477289		0.00698082		0.000889651	0.000710157	0.000414281
148.17	C8H21NOH	unknown	0.000274206	0.000198029	0.000291996	0.000134392	0.000263942	0.000161449	0.000899224	0.00116459	0.000418996	0.000365427	0.000763118	0.000108538	0.00255692		0.000725049	2.21242e-05	0.000838696	0.000404448	0.000237845	5.09049e-05	0.000312503	5.41463e-05	0.000272057	6.11414e-05	0.000202866	7.15789e-05	0.000660162	0.000383562	0.00192627		0.00183595		0.00326957		0.00584348		0.000236187	0.000182665	0.000124171
149.023	C8H4O3H	unknown	0.00712014	0.00210235	0.00779495	0.00269005	0.0058952	0.00328412	0.00595786	0.002555	0.0101377	0.00364119	0.00194809	2.54454e-05	0.00645994		0.00157539	0.000158555	0.00212471	0.00123667	0.000536182	0.000210949	0.000779436	1.96236e-05	0.00065892	0.000123826	0.000344719	8.70481e-05	0.00113949	0.000697551	0.00860115		0.00513382		0.00726515		0.0536626		0.000354943	0.000228105	0.000195017
149.06	C9H8O2H	unknown	0.0481404	0.0186392	0.0414322	0.0166741	0.0529116	0.0299987	0.0632466	0.0455363	0.0605127	0.0373398	0.00103138	0.000172806	0.00306876		0.00164377	7.79858e-05	0.00224153	0.00128383	0.000459606	0.000163154	0.000596918	0.000123502	0.000428019	4.82988e-05	0.0002236	4.64402e-05	0.000822147	0.00040185	0.00460465		0.00105247		0.00429772		0.0208144		0.000148199	8.54108e-05	0.000125814
149.096	C10H12OH	Methyl chavicol (estragole)	0.0571958	0.0569208	0.0268963	0.012484	0.0214086	0.0106032	0.0465376	0.0339982	0.0323871	0.0205494	0.000222745	2.65402e-05	0.00102612		0.000135502	5.03085e-06	0.000195009	8.96424e-05	3.24216e-05	3.81701e-06	3.27182e-05	5.94972e-06	3.95453e-05	1.33871e-05	2.66563e-05	7.78665e-06	0.000117736	8.46172e-05	0.000762288		0.000425635		0.00211466		0.00521536		4.42644e-05	3.113e-05	3.54894e-05
149.132	C11H16H	C11 aromatics	0.00890358	0.00717507	0.0141932	0.00776452	0.0094938	0.00572678	0.0256289	0.0210804	0.012001	0.00724491	0.000172983	8.58737e-06	0.000645533		0.00022895	9.24367e-06	0.000278003	0.000131194	4.87107e-05	1.28605e-05	5.87417e-05	2.50073e-06	5.18244e-05	1.02903e-05	3.37207e-05	9.57216e-06	0.000123525	6.47233e-05	0.000743596		0.000281487		0.000710282		0.00258342		4.98907e-05	2.86681e-05	3.73371e-05
150.055	C8H7NO2H	unknown	0.00372694	0.00173862	0.00312667	0.00116982	0.00466885	0.00574331	0.0052364	0.004771	0.00803025	0.00685794	0.0287811	0.00440232	0.103473		0.00460025	0.000600885	0.00388375	0.000958517	0.00248776	0.00110472	0.00262163	0.000328493	0.00142121	0.000201944	0.00101216	0.000262831	0.00306541	0.00198787	0.0314413		0.0149996		0.0418844		0.0533713		0.00848691	0.0064877	0.00156831
150.076	C5H11NO4H	unknown	0.00575604	0.0029026	0.00469076	0.00225936	0.00601941	0.0077994	0.00702655	0.00522615	0.01081	0.00825371	0.0038433	0.00136944	0.0194063		0.00261024	0.000486967	0.00255497	0.00123832	0.000380487	5.80316e-05	0.000480292	8.00518e-05	0.000382861	0.000166533	0.000260968	0.000114745	0.00130264	0.000611123	0.00785561		0.00471948		0.00873765		0.00926686		0.00192434	0.00135786	0.000641874
150.091	C9H11NOH	unknown	0.000614832	0.000557432	0.000760211	0.000293032	0.000830447	0.000772685	0.00512802	0.00777206	0.00267616	0.0032782	0.00241133	0.00028208	0.00471096		0.00137624	3.59266e-05	0.00180548	0.000916094	0.000451438	0.000122235	0.000606905	5.29405e-05	0.000376146	8.51258e-05	0.00017275	1.52267e-05	0.000973456	0.000521664	0.00589214		0.00200708		0.00528612		0.0356159		0.000188021	0.000100392	5.489e-05
150.128	C10H15NH	unknown	0.000463261	0.000426262	0.00052397	0.000232456	0.000364766	0.000292575	0.00336373	0.00612038	0.00202164	0.00195143	0.00134507	2.89085e-05	0.00518944		0.00138995	0.000152924	0.00129897	0.000225036	0.000326062	1.14693e-05	0.000352401	9.10996e-05	0.000374181	6.99658e-05	0.000382232	0.000173106	0.00185246	0.00118368	0.00494973		0.00258169		0.00327		0.00267642		0.0007906	0.000693812	0.00071036
151.024	C4H6O6H	unknown	0.00305415	0.00184666	0.00275179	0.00061979	0.00239714	0.00143761	0.00324221	0.00185514	0.00435653	0.00289587	0.00771878	0.00258627	0.0173048		0.011727	0.0013877	0.0144204	0.00801641	0.00504616	0.00122187	0.00538324	0.000758306	0.00481422	0.000596075	0.00367516	0.00110571	0.0490013	0.0375191	0.0237884		0.0130344		0.0170578		0.0228106		0.00572121	0.00450377	0.0023083
151.039	C8H6O3H	unknown	0.0136304	0.00547438	0.0117491	0.00493431	0.0183718	0.0186487	0.0124203	0.00992376	0.0167656	0.0100408	0.0130259	0.00253988	0.0306062		0.00466114	0.000606188	0.00443912	0.000660645	0.00192207	0.000443966	0.00256224	0.000293265	0.006332	0.00113503	0.00429898	0.000851777	0.00333872	0.00140744	0.0229871		0.0199487		0.0140104		0.0312551		0.00540239	0.00292404	0.00193234
151.075	C9H10O2H	vinylguaiacol	0.180097	0.0915643	0.141098	0.0759576	0.217494	0.31087	0.183321	0.123073	0.214518	0.138649	0.0165953	0.00445253	0.0164215		0.0121189	0.00395458	0.00720627	0.00586895	0.00180741	0.000853387	0.00209439	0.000411773	0.000977524	0.000304435	0.000603855	0.000182617	0.00256483	0.00181722	0.0167513		0.00310945		0.0405161		0.0388565		0.000751791	0.000384033	0.000250795
151.112	C10H14OH	unknown	0.0183469	0.0119762	0.0156979	0.00434345	0.0187929	0.0146606	0.0551436	0.0430654	0.0194329	0.0132563	0.00132019	0.000221684	0.00399967		0.00101862	8.46442e-05	0.00112373	0.000631506	0.000327678	9.53651e-05	0.000429511	6.21742e-05	0.000386979	0.000101785	0.000233658	8.14571e-05	0.00125741	0.000883167	0.00302844		0.00212143		0.00704102		0.0126108		0.000411297	0.000330411	0.000156399
151.148	C11H18H	unknown	0.0136828	0.00860818	0.0158203	0.00797276	0.0112433	0.00547808	0.0258315	0.0192001	0.0163642	0.0111303	0.00230627	0.000129812	0.00572277		0.00125606	2.02923e-05	0.00184953	0.000991245	0.000470477	0.000165776	0.000664877	2.93039e-05	0.000452267	9.06822e-05	0.000219824	2.37049e-05	0.000910041	0.000381406	0.0055337		0.00267254		0.00594723		0.0350639		0.000217656	0.000133954	0.000110578
152.034	C7H5NO3H	unknown	0.00144576	0.000934595	0.00108909	0.000352117	0.0018828	0.00248658	0.00118894	0.000581631	0.00248868	0.00186937	0.000320961	0.000117887	0.00112896		0.00024573	2.10733e-05	0.000308976	0.000119601	5.20815e-05	7.1178e-06	6.16825e-05	2.37739e-06	5.79466e-05	1.78401e-05	3.61589e-05	1.42242e-05	0.000193416	9.27388e-05	0.000982351		0.000526613		0.00095645		0.00320111		0.000114845	8.05124e-05	4.21573e-05
152.071	C8H9NO2H	unknown	0.00131323	0.000579001	0.00153364	0.000572669	0.00125108	0.000561291	0.00553797	0.00852225	0.00747178	0.00749674	0.00699462	0.00245834	0.011664		0.00443733	7.78669e-05	0.00337615	0.000892258	0.0021275	0.000485406	0.0023838	0.000767979	0.00205355	0.000368023	0.00166049	0.000481737	0.00312683	0.00118802	0.0101863		0.0105998		0.0228409		0.0114072		0.00383311	0.0035526	0.00117515
153.055	C8H8O3H	Vanillin, methyl salicylate, C8 aromatic hydroxyacid	0.215836	0.146908	0.139319	0.0441238	0.348875	0.546797	0.168539	0.0958722	0.347468	0.257313	0.0431977	0.00908329	0.105173		0.0252687	0.00337105	0.0234299	0.00797109	0.0123208	0.00312004	0.0143288	0.000638354	0.0082678	0.00135898	0.00563319	0.0012748	0.0827885	0.0787163	0.0861104		0.0542231		0.0475727		0.107473		0.019387	0.0145273	0.00598717
153.07	C12H8H	acenaphthylene	0.0104699	0.00941451	0.0100005	0.00663753	0.0152734	0.0152079	0.0218933	0.0335106	0.00663989	0.00519876	0.00337979	0.000504353	0.0116733		0.00179033	0.000137679	0.00166608	0.000440387	0.000457399	0.000130266	0.000597299	0.000111225	0.000501459	0.000110571	0.000306704	5.47881e-05	0.000833124	0.000329259	0.00794745		0.0052508		0.00526722		0.0226612		0.00129447	0.00107068	0.000339524
153.091	C9H12O2H	unknown	0.0980269	0.0397749	0.0758933	0.0236444	0.148798	0.216506	0.128026	0.0925546	0.163196	0.110438	0.00548886	0.000987004	0.0150986		0.00227253	0.000257902	0.00242475	4.76149e-06	0.000641804	0.000115583	0.000746052	0.000176784	0.000641289	0.000120699	0.000395569	6.64407e-05	0.000723381	0.000243148	0.0132109		0.00794611		0.00348814		0.0248005		0.00184249	0.00150742	0.000406354
153.127	C10H16OH	camphor (30%), other oxygenated monoterpenes (70%) VARIABLE	0.0259119	0.0412704	0.0266855	0.0171217	0.0248772	0.0222469	0.0660033	0.0531453	0.0253086	0.00224908	0.000608715	4.29473e-05	0.0020443		0.000617412	4.63496e-05	0.00122384	0.000695025	0.000228915	7.13361e-05	0.000312061	2.2034e-05	0.000222759	3.30335e-05	0.000115856	1.82072e-05	0.000614825	0.000321634	0.00208931		0.0010566		0.00251947		0.0202534		6.80936e-05	2.47863e-05	7.34162e-05
153.164	C11H20H	unknown	0.00767588	0.00536659	0.00632604	0.00307508	0.00818302	0.00798222	0.00968726	0.00849379	0.010151	0.00776035	0.000466643	7.90114e-06	0.00139267		0.000344535	1.30346e-06	0.000396853	0.000162388	8.83472e-05	2.6041e-05	9.90199e-05	8.36389e-06	8.26122e-05	1.87942e-05	4.7015e-05	9.05781e-06	0.00018167	0.000116132	0.00131686		0.00061968		0.00147226		0.0126299		7.30934e-05	3.50497e-05	3.02379e-05
154.065	C11H7NH	unknown	0.00283415	0.00216664	0.00253156	0.000796649	0.00271644	0.00311837	0.00400367	0.00318037	0.00319664	0.00268117	0.00223296	0.000556159	0.00931358		0.00148207	9.30868e-05	0.00179309	2.66822e-05	0.000357405	8.31627e-05	0.000413495	9.12139e-05	0.000394638	2.76674e-05	0.000320734	0.00010182	0.000788127	0.000357595	0.0093987		0.00487745		0.00259487		0.00768931		0.00163517	0.00143273	0.000611426
154.086	C8H11NO2H	unknown	0.000923638	0.000697213	0.00138738	0.000742816	0.000724732	0.00044776	0.00784415	0.0138949	0.00786942	0.00957819	0.00973706	0.00473977	0.0249802		0.00681762	0.00130526	0.00589695	0.0024549	0.00307545	0.000887401	0.00419163	0.000704625	0.0027817	0.000745732	0.00192738	0.000729832	0.00414681	0.00163126	0.0159502		0.00709266		0.00716474		0.011659		0.00510307	0.00407299	0.00174453
154.172	C11H21H	unknown	0.000267607	0.000222848	0.000313907	0.000142134	0.000289476	0.000203351	0.00177518	0.00278032	0.00088496	0.00105601	0.0185388	0.00221318	0.0365084		0.0181895	0.00559604	0.035318	0.0244032	0.00301212	0.000430145	0.00295107	0.000484637	0.00184793	0.000575045	0.00115487	0.000363021	0.00349899	0.000736842	0.0221542		0.00410931		0.0287406		0.0328423		0.0031507	0.00166783	0.00110158
155.034	C7H6O4H	unknown	0.0074058	0.00264872	0.00720296	0.00229214	0.00956633	0.00550457	0.00726447	0.0039928	0.00630647	0.00338671	0.0191012	0.000889195	0.0449941		0.012524	0.0034007	0.00738828	0.00176747	0.00173655	0.000637445	0.00191054	0.000254189	0.00170387	0.000392403	0.00101841	0.000322116	0.00277571	0.00143118	0.0499137		0.0336793		0.0325552		0.0889864		0.00643037	0.00541498	0.00118756
155.07	C8H10O3H	syringol	0.0250864	0.00893419	0.0215732	0.00783861	0.0267586	0.0235018	0.045171	0.0306312	0.0445374	0.0359418	0.000826516	0.000182783	0.00482438		0.000580133	1.40395e-05	0.000494237	7.95021e-05	0.000165376	3.74006e-05	0.000220155	6.26134e-05	0.000193127	7.16897e-05	0.000166005	7.50317e-05	0.000316102	0.00010335	0.0025089		0.00166329		0.000983651		0.00166185		0.000554518	0.000518642	0.000221239
155.086	C12H10H	unknown	0.012599	0.00940259	0.0150211	0.00842276	0.0127127	0.0126214	0.0195014	0.0224797	0.0121075	0.00820343	0.00136183	0.000394377	0.00729763		0.000609327	5.65852e-05	0.00080588	0.000252055	0.00027632	6.57349e-05	0.000361852	5.34713e-05	0.0002992	6.37409e-05	0.000197862	4.33558e-05	0.000447117	0.000220126	0.00262981		0.00150475		0.00303245		0.041347		0.000359071	0.000272983	0.000219725
155.107	C9H15O2	unknown	0.00744723	0.00392192	0.0078533	0.00295448	0.00655963	0.00287965	0.0146677	0.0128419	0.00967643	0.00598546	0.119757	0.0223743	0.351917		0.0330281	0.00526534	0.0416656	0.007462	0.0151091	0.00221497	0.0162232	0.00231618	0.0095683	0.00183426	0.00683646	0.00220056	0.0134894	0.00301873	0.157046		0.11794		0.0658621		0.309026		0.0386042	0.0311351	0.0128785
155.143	C10H18OH	Cineole, other oxygenated monoterpenes	0.00353938	0.00170583	0.00563755	0.00207006	0.00469552	0.00295461	0.01111	0.00894178	0.00726955	0.00593566	0.00749596	0.00281856	0.0383685		0.0044368	0.000825912	0.00614266	0.00489232	0.00112356	0.000305181	0.00131959	9.94323e-05	0.00148815	0.000315757	0.00126446	0.000721143	0.00202084	0.000531898	0.0201758		0.0130597		0.0137051		0.0290725		0.00445785	0.00364487	0.00174729
155.179	C11H22H	unknown	0.00280493	0.00154394	0.00332816	0.00132768	0.00256414	0.00131394	0.00710982	0.00539613	0.00544578	0.00492466	0.000915757	0.000300051	0.00191971		0.00325245	0.000389162	0.006348	0.00222668	0.00311145	0.00082201	0.00366967	0.000284804	0.0034744	0.000605355	0.00225877	0.000426991	0.00290538	0.000634042	0.0134101		0.00207596		0.0028065		0.0112352		0.00490601	0.00372246	0.000305524
156.066	C7H9NO3H	unknown	0.00114717	0.000742014	0.00125814	0.000470403	0.00112932	0.000583684	0.00316224	0.00354871	0.0033783	0.00335146	0.00112217	0.00011481	0.00543776		0.000602237	2.04496e-05	0.000540555	3.67257e-05	0.000119465	3.73432e-05	0.000126077	1.82534e-05	0.000123201	2.7247e-05	8.73762e-05	3.66632e-05	0.00058289	0.000510673	0.00423968		0.00352687		0.00532687		0.0432364		7.92424e-05	3.42392e-05	0.000106349
157.05	C7H8O4H	unknown	0.0106564	0.00344217	0.0107041	0.00373032	0.0138297	0.00931976	0.0131025	0.00772947	0.010223	0.00610998	0.000325142	3.95368e-05	0.0011321		0.000353678	3.41233e-05	0.000229837	4.28076e-05	8.83586e-05	1.57252e-05	9.29677e-05	1.26091e-05	9.77969e-05	1.40346e-05	6.50729e-05	1.49809e-05	0.000218465	0.000115945	0.00136002		0.000661726		0.00162869		0.00780068		0.000148854	0.000112118	5.73728e-05
157.065	C11H8OH	unknown	0.00831618	0.00555651	0.00965185	0.0057339	0.00823504	0.00684014	0.0106732	0.0112073	0.00572954	0.00265712	0.00570837	0.00138408	0.0269803		0.00469203	0.000713091	0.0043921	0.00247308	0.000942753	0.000183581	0.00141965	0.000656852	0.00109962	0.000686328	0.00120818	0.000651475	0.00338763	0.00184901	0.0193506		0.00365538		0.00254517		0.00507822		0.00274465	0.00314029	0.00149748
157.086	C8H12O3H	unknown	0.0122637	0.00525439	0.010645	0.00367391	0.0185157	0.0252777	0.0156532	0.011962	0.0208783	0.0141085	0.0043898	0.00130022	0.00736817		0.0124123	0.00562944	0.0119673	0.00686277	0.00428697	0.00222783	0.00541944	0.00153729	0.00284993	0.000757924	0.0030824	0.00119888	0.00390961	0.00224905	0.00833451		0.00103855		0.0109198		0.00699989		0.000479579	4.5109e-05	0.00177375
157.101	C12H12H	C2 naphthalenes	0.0251128	0.0194628	0.0252548	0.0129478	0.0224253	0.014007	0.0493916	0.0457983	0.0236734	0.0177151	0.00824734	0.00159186	0.0217179		0.00593429	0.0011052	0.00451011	0.00339244	0.000115215	4.95777e-05	0.000140544	4.87499e-05	0.000100065	0.000159159	3.36744e-05	3.20356e-05	0.000926897	0.000762027	0.00685691		0.0107868		0.00805696		0.0217532		0.000468974	0.000441202	0.000624279
157.122	C9H16O2H	unknown	0.00439551	0.0026477	0.00806296	0.00421132	0.00429537	0.0030426	0.0102803	0.00776525	0.00823069	0.00648433	0.00292233	0.000157958	0.00787551		0.00273553	0.000596861	0.00469802	0.000872098	0.00249275	0.000428205	0.00257335	0.000534309	0.00197172	0.000245398	0.00132744	0.000561374	0.00228893	9.9814e-05	0.0214817		0.00820536		0.0200098		0.0212579		0.00655903	0.00583022	0.00068713
157.159	C10H20OH	Decanal (likely major contributor), menthol	0.00174411	0.000959937	0.00246296	0.00125639	0.00185602	0.00117215	0.00503001	0.00622644	0.00407131	0.00352988	0.000744775	6.30117e-05	0.0028461		0.00083454	3.60118e-05	0.00108808	0.000583813	0.000239157	0.000134989	0.000319972	1.87758e-05	0.000315342	1.91987e-05	0.000226332	6.86606e-05	0.000589112	0.00035173	0.00280549		0.0021042		0.0026887		0.0173783		8.19109e-05	2.02542e-05	0.000134634
157.195	C11H24H	unknown	0.00151159	0.00110874	0.00181079	0.000958377	0.00157786	0.000990861	0.00365483	0.00267556	0.00135431	0.00102619	0.00910606	0.00198317	0.0263501		0.00499975	0.000925673	0.00716953	0.00296821	0.00263195	0.000967453	0.00402478	0.000833284	0.00220036	0.000589897	0.00187864	0.000681345	0.00481025	0.00206311	0.0553228		0.0173296		0.00647717		0.0357793		0.00918519	0.0076779	0.00217947
158.096	C11H11NH	unknown	0.000868242	0.000767079	0.000875126	0.000399975	0.000770157	0.00054281	0.00292502	0.0034427	0.00230332	0.00230628	0.00298533	0.00124418	0.00679079		0.00870959	0.00210294	0.00905592	0.00429232	0.00351101	0.00124026	0.0038473	4.48833e-05	0.00358182	0.000710689	0.00311311	0.000982191	0.00291844	0.00104821	0.011911		0.00374916		0.00273462		0.00699854		0.0014946	0.00088258	0.00159897
158.975	C5H2O4SH	unknown	0.000176859	7.54728e-05	0.000252324	7.57692e-05	0.000149629	8.83656e-05	0.000320729	0.000224285	0.000331826	0.000215657	0.0125834	0.00192956	0.0454277		0.00441364	0.000871904	0.00555204	0.000594105	0.00202467	0.000265981	0.00197116	0.000431654	0.0017622	0.000168831	0.00123092	0.000341277	0.00238805	0.000633552	0.0266409		0.0227584		0.0104573		0.0324763		0.00584779	0.00504638	0.00215563
159.029	C6H6O5H	unknown	0.00230673	0.00141464	0.00288543	0.00153997	0.00277343	0.00245915	0.00217894	0.000972653	0.00223369	0.00124469	0.00661152	0.00129445	0.0154194		0.0044748	0.00113424	0.00241888	0.00107995	0.00135008	0.000690019	0.00140924	1.53167e-05	0.00091391	0.000108257	0.000658907	0.000204219	0.00168917	0.00115774	0.0119701		0.0033796		0.0105407		0.0148253		0.00331742	0.00325295	0.000500649
159.044	C10H6O2H	unknown	0.00428576	0.00178762	0.00462887	0.00163033	0.00412333	0.00232468	0.00488341	0.00344304	0.00379506	0.00133741	0.00210562	0.000241427	0.00598214		0.00202272	0.000471684	0.00167838	0.000887993	0.000394953	0.000119148	0.000443323	4.97507e-05	0.000270953	6.67552e-05	0.000189325	5.80951e-05	0.000570598	0.000206852	0.00463572		0.0016851		0.00725483		0.00655733		0.000581112	0.000491765	0.000252397
159.065	C7H10O4H	unknown	0.00846205	0.00261515	0.00794214	0.00241257	0.00807343	0.0047515	0.0122393	0.00867669	0.0123662	0.0077373	0.000690672	0.00010003	0.00180644		0.000651381	3.05397e-05	0.000835018	0.000488389	0.000186227	5.94242e-05	0.000235591	2.22288e-05	0.000174239	2.40084e-05	8.90765e-05	1.39742e-05	0.000354401	0.000197357	0.00257003		0.00102431		0.00242894		0.0151284		9.2946e-05	5.15482e-05	6.15155e-05
159.08	C11H10OH	unknown	0.0181604	0.00958767	0.0171338	0.00854241	0.0151804	0.00984573	0.0277842	0.0257211	0.0237724	0.0151527	0.000153772	2.84987e-05	0.000290336		0.000142187	2.46151e-05	0.00019683	5.42021e-05	4.25237e-05	4.5302e-07	4.88032e-05	2.0175e-05	4.21446e-05	2.06236e-05	3.84042e-05	1.73535e-05	8.23427e-05	3.72284e-05	0.000493935		0.000118234		0.00024635		0.000370863		9.35325e-05	9.51708e-05	3.61276e-05
159.117	C12H14H	unknown	0.0130877	0.011506	0.0132798	0.00640609	0.00999351	0.00569608	0.0317693	0.0285625	0.0148612	0.0124868	0.00134256	0.000288241	0.0103887		0.0015444	3.56822e-05	0.0013087	0.000800654	0.000444584	0.000117572	0.000513738	0.000189535	0.000381507	0.00011045	0.000416595	0.000287398	0.00112215	0.000704215	0.00668824		0.00281506		0.00123772		0.00296829		0.000948135	0.00105297	0.000934666
159.138	C9H18O2H	unknown	0.0027381	0.00113441	0.00443246	0.00248197	0.00224101	0.000799221	0.00744674	0.0077832	0.00978481	0.00925056	0.00210927	0.000795926	0.00455488		0.00424275	0.000984575	0.00440038	0.00147596	0.00201494	0.000508736	0.00206699	0.000161297	0.00266621	0.000540314	0.00231951	0.000553926	0.00196999	0.000606943	0.00572443		0.00310388		0.00155396		0.00480602		0.00126344	0.000950334	0.00105109
159.174	C10H22OH	unknown	0.000642602	0.000407764	0.000754145	0.000385023	0.000718942	0.000525977	0.00122027	0.000858483	0.0005332	0.000349932	0.00843012	0.00105572	0.0210762		0.00364555	0.000203682	0.00489322	0.00126074	0.00253182	0.000552906	0.00279795	0.000466132	0.00200057	0.000396347	0.00141844	0.000273727	0.00292451	0.000575077	0.0306478		0.0177656		0.00991557		0.0257997		0.00869695	0.00794401	0.00164283
160.076	C10H9ONH	unknown	0.00076249	0.000611955	0.000747484	0.000394746	0.000736544	0.000515493	0.00185703	0.00192299	0.00182988	0.00160098	0.0120851	0.00349229	0.0218304		0.0107679	0.00267058	0.0134391	0.00671636	0.00489443	0.00128927	0.00579299	0.000811039	0.00311298	0.00048763	0.00199716	0.000552491	0.00546183	0.0016767	0.0321499		0.0134716		0.0192113		0.0488313		0.00457412	0.00309447	0.00162829
160.112	C11H13NH	unknown	0.00059582	0.000499455	0.000633139	0.000208865	0.000490537	0.00032027	0.00281131	0.00409496	0.00241706	0.00247223	0.0200567	0.0055724	0.0272875		0.0131902	0.00388562	0.00881655	0.00690319	0.00268232	0.0010102	0.00324426	0.000662886	0.00136318	0.000347735	0.000900727	0.000279517	0.00228919	0.00110748	0.0215058		0.00540614		0.0556025		0.0457307		0.00133132	0.000643307	0.00047999
161.06	C10H8O2H	unknown	0.0176637	0.00704143	0.0164083	0.00645319	0.0164375	0.0087685	0.0221923	0.0158072	0.0214486	0.0124104	0.00535022	0.00154	0.0164799		0.00158409	0.000193158	0.00147298	0.000243103	0.000810453	0.000314017	0.000733241	8.04598e-05	0.000668213	6.98947e-05	0.000514884	0.000134089	0.000983796	0.000528132	0.00889385		0.00292679		0.0104004		0.017377		0.00206243	0.00178937	0.000373053
161.096	C11H12OH	unknown	0.0209436	0.00970149	0.0193857	0.00694402	0.0171174	0.00788845	0.0424707	0.0354829	0.0363207	0.0257887	0.000452815	0.00043115	0.00185102		0.000626611	0.000100506	0.000964958	0.000375203	0.000140988	6.95896e-06	0.000167311	6.80701e-06	0.000163165	7.56791e-05	0.00010851	5.19793e-05	0.000434677	0.0001133	0.00325005		0.00171379		0.00136912		0.00334757		0.00064446	0.000567177	0.000163644
162.055	C9H7NO2H	unknown	0.00157529	0.000844169	0.00153706	0.000388758	0.00155054	0.00084179	0.00348619	0.00426413	0.00537727	0.00508053	0.000566021	6.48459e-05	0.00145351		0.000455867	3.67868e-06	0.000604832	0.000332298	0.000151294	5.44817e-05	0.0002189	1.38813e-06	0.000149254	2.22543e-05	8.41884e-05	2.04753e-05	0.000296606	0.000162271	0.00160399		0.000879085		0.00156126		0.0104259		9.93279e-05	6.16204e-05	4.14904e-05
162.091	C10H11NOH	unknown	0.000979259	0.000791249	0.000992344	0.000461446	0.000826284	0.000545297	0.0040687	0.00549346	0.00341465	0.00328337	0.000719819	0.000103085	0.00162274		0.000443335	7.62753e-05	0.000567648	0.000298421	0.000129459	2.1209e-05	0.000172706	1.65754e-05	0.00012177	1.69339e-05	6.67735e-05	1.31629e-05	0.000247027	0.000119686	0.00188496		0.00065751		0.0021886		0.0161435		7.51691e-05	5.58096e-05	2.87909e-05
162.185	C9H23NOH	unknown	0.00018329	0.00011474	0.000213342	8.75071e-05	0.00019049	9.63373e-05	0.000643501	0.00080188	0.000327492	0.000273468	0.0129603	0.00426221	0.0253121		0.00978089	0.00162557	0.0104615	0.00498339	0.00500578	0.00124544	0.00596049	0.000308893	0.00399079	0.000569396	0.00268715	0.000743215	0.00875611	0.00467695	0.0336217		0.0177164		0.0205959		0.034318		0.00752505	0.00549426	0.00205522
163.039	C9H6O3H	unknown	0.010523	0.00355611	0.00944808	0.00275029	0.0106297	0.00703379	0.00941387	0.00711123	0.0124792	0.00708425	0.0248195	0.00617993	0.0467996		0.0108673	0.00304285	0.0141588	0.00590259	0.00580566	0.000674934	0.00620095	0.000660886	0.00342935	0.000616088	0.00211823	0.000412675	0.00683302	0.00129427	0.0529094		0.0252767		0.0449249		0.0821909		0.00739106	0.00496012	0.00187218
163.075	C10H10O2H	unknown	0.0476163	0.0182708	0.0396138	0.0157159	0.050145	0.0392103	0.0635191	0.0495316	0.0771943	0.0519168	0.00137216	0.000186316	0.00464949		0.000733959	1.39493e-05	0.000935255	0.00052693	0.0002815	8.38035e-05	0.000376618	1.30714e-05	0.000287854	7.20051e-05	0.000167752	4.34118e-05	0.000598185	0.000289138	0.00309361		0.00222637		0.00822422		0.017414		0.000327338	0.000264369	0.000108946
163.112	C11H14OH	unknown	0.00517478	0.00311174	0.00572638	0.00212442	0.00386724	0.0022789	0.0147425	0.0137569	0.00938137	0.0072092	0.00117917	6.86811e-05	0.00258252		0.000521626	9.54484e-06	0.000817069	0.000361984	0.000196387	7.57679e-05	0.000284834	1.33611e-05	0.000189551	2.93453e-05	9.67861e-05	1.345e-05	0.000411173	0.000207583	0.00284972		0.00133042		0.00233085		0.0226549		0.000117811	6.78235e-05	5.3969e-05
163.148	C12H18H	C12 aromatics	0.00759062	0.00744243	0.00726475	0.00383617	0.00484262	0.0027171	0.0121351	0.0108079	0.00703809	0.0055936	0.000259082	9.57811e-05	0.000840336		0.000165193	9.46631e-08	0.000210817	8.06767e-05	4.11045e-05	5.81096e-06	4.97411e-05	4.78958e-06	4.11046e-05	1.36408e-05	2.71026e-05	1.00011e-05	0.000119914	5.04333e-05	0.000791257		0.000389626		0.000797688		0.0027219		8.832e-05	6.67095e-05	2.75549e-05
163.169	C9H22O2H	unknown	0.00231131	0.00113501	0.00233752	0.00101771	0.00253806	0.00143835	0.0044725	0.00343789	0.00320526	0.00216918	0.0090533	0.00342191	0.0190416		0.00459517	0.000512407	0.00498585	0.00224984	0.00305759	0.00103046	0.00387961	0.000563852	0.00223844	0.000370061	0.00159231	0.000462985	0.00345773	0.00153165	0.017868		0.0136282		0.022317		0.0193505		0.00410452	0.00343586	0.00118709
164.071	C9H9O2NH	unknown	0.00191223	0.000824315	0.00164902	0.000581489	0.00209985	0.00189089	0.00316806	0.00277594	0.00419994	0.00338363	0.0470242	0.011947	0.107193		0.0176254	0.00355598	0.019954	0.00483014	0.00953385	0.00210569	0.01149	0.000454538	0.00675646	0.000964213	0.00433671	0.000509428	0.0133112	0.00683883	0.0782598		0.0429856		0.0468546		0.123186		0.0181575	0.013218	0.00482837
164.092	C6H13NO4H	unknown	0.00197796	0.000792904	0.00167769	0.000637851	0.00200039	0.00207702	0.00323651	0.00260324	0.00430209	0.00335474	0.00832772	0.00139756	0.0139851		0.00415894	0.000984397	0.00513864	0.0034658	0.00144594	0.00015052	0.0014373	0.000217138	0.000835482	0.000188652	0.00047917	9.74812e-05	0.00121246	2.77872e-06	0.0180257		0.00878631		0.0141061		0.0283399		0.00246873	0.00168946	0.000288619
165.055	C9H8O3H	unknown	0.015707	0.00579754	0.0134303	0.00638916	0.0213921	0.0199576	0.0170482	0.0163222	0.0208434	0.0124051	0.00281686	0.000872418	0.0102638		0.00143943	0.000135021	0.00185711	0.000460891	0.000432903	4.35986e-05	0.000513167	4.61082e-05	0.000413096	0.000130909	0.00027171	8.53297e-05	0.00111101	0.000552782	0.007699		0.0039228		0.00536639		0.0110564		0.00154094	0.00112279	0.000356302
165.091	C10H12O2H	Eugenol, isoeugenol	0.148721	0.0722984	0.103794	0.0452539	0.188846	0.277936	0.145384	0.0933427	0.209533	0.127853	0.00154798	0.000223186	0.00562708		0.000860764	2.84226e-05	0.000913364	0.000327564	0.000276602	8.82266e-05	0.000400378	2.95337e-05	0.000305512	9.62735e-05	0.000173594	2.91724e-05	0.000472979	0.000220979	0.0040491		0.00174716		0.00218215		0.0133962		0.000601881	0.000542024	0.000191085
165.164	C12H20H	unknown	0.00566596	0.00303787	0.00668581	0.00216081	0.00445557	0.00348085	0.0116308	0.00893285	0.0090859	0.00664668	0.00176302	0.000379964	0.00536132		0.000848146	8.5552e-05	0.000968238	0.000115849	0.000273576	4.9602e-05	0.000338719	6.45771e-05	0.000289344	8.11929e-05	0.00017107	3.64295e-05	0.000366648	0.000131112	0.00346292		0.00130279		0.0017779		0.00794542		0.000585708	0.000560018	0.000184236
166.123	C10H15NOH	unknown	0.000290539	0.000289784	0.000380915	0.000150636	0.000317738	0.000279523	0.00190349	0.0027275	0.00132493	0.00129155	0.0133175	0.00503243	0.0270949		0.00507275	0.00101724	0.00697706	0.00275226	0.00526641	0.00183594	0.00722768	0.000649431	0.00415741	0.00106112	0.00267339	0.000688266	0.00674195	0.00308888	0.0424439		0.0298033		0.00847214		0.0373186		0.00854002	0.00672914	0.00160723
166.172	C12H21H	unknown	0.000771485	0.000396143	0.00076372	0.000319464	0.000604304	0.000265414	0.00282942	0.00392137	0.00262358	0.0028426	0.0077706	0.0010304	0.0213824		0.004666	0.00114108	0.00347661	0.000869538	0.000868409	0.000314514	0.000944083	0.000108336	0.000824029	0.000227687	0.000506981	0.000191676	0.00129231	0.000530861	0.0158276		0.0058102		0.0159301		0.0264522		0.00296447	0.00242107	0.000588306
167.019	C4H7O7	unknown	0.00161204	0.00101852	0.00147038	0.000559063	0.00126653	0.000944802	0.00153649	0.000848394	0.00262756	0.00162997	0.000481342	0.000115159	0.00103334		0.000229235	1.48404e-05	0.000312713	0.000185044	8.76916e-05	1.95653e-05	0.00010091	7.07397e-06	7.6217e-05	1.39028e-05	4.12953e-05	5.36739e-06	0.000163545	9.48753e-05	0.00119642		0.000629516		0.00146458		0.0107776		5.1216e-05	1.92809e-05	2.55963e-05
167.07	C9H10O3H	unknown	0.0627708	0.0433019	0.0414243	0.0117406	0.120496	0.21099	0.0504626	0.0298911	0.111151	0.084662	0.000806781	6.02502e-05	0.00268357		0.000462682	6.56223e-05	0.00063974	0.000127984	0.0001413	3.29358e-05	0.000162809	1.96976e-05	0.000141116	1.80755e-05	9.2264e-05	2.19592e-05	0.000267226	0.000155589	0.00228487		0.000918238		0.00318194		0.0085656		0.000279068	0.000196211	8.65145e-05
167.107	C10H14O2H	unknown	0.0288131	0.0105525	0.0230609	0.00692683	0.030382	0.0166912	0.0483481	0.0353061	0.045392	0.0281251	0.000999887	0.000206946	0.00248679		0.000682297	0.000102154	0.000937254	0.000273273	0.000238916	3.81902e-05	0.000314695	0.000118622	0.000212159	9.95071e-05	0.000210214	9.79784e-05	0.000412185	0.000156443	0.00310584		0.0014374		0.0012816		0.0022817		0.00074172	0.00077332	0.000254744
167.143	C11H18OH	unknown	0.00403296	0.00186036	0.00602765	0.00241458	0.00318998	0.00181734	0.0104952	0.0100666	0.00905712	0.00728407	0.0505983	0.0153014	0.187636		0.0169882	0.00234673	0.0182338	0.00359424	0.00868099	0.00200324	0.0107832	0.00198334	0.00751032	0.00170541	0.00503303	0.00108885	0.0104586	0.00264817	0.0908792		0.0532387		0.0578653		0.108213		0.0262611	0.0207885	0.00761395
167.179	C12H22H	unknown	0.00365406	0.00242209	0.00309229	0.00111986	0.00572591	0.00723114	0.00484488	0.00255722	0.00537657	0.00402379	0.0315014	0.00601469	0.0795817		0.0122079	0.00234179	0.0254697	0.0107428	0.00457695	0.000720581	0.00467413	0.000534389	0.00302085	0.000543106	0.00206685	0.000646471	0.00412454	0.000913419	0.044335		0.0271817		0.0181394		0.086971		0.01015	0.00784762	0.00354068
168.102	C9H13NO2H	unknown	0.00121446	0.000969012	0.00153341	0.000728614	0.000824346	0.000525639	0.00723446	0.0114697	0.00607526	0.00717689	0.00671058	0.000922132	0.0147338		0.00315627	0.000626278	0.00198161	0.00114454	0.000912398	0.000353883	0.000934986	9.88965e-05	0.000708745	0.000192244	0.000428204	8.27245e-05	0.00125454	0.000793489	0.0134513		0.00516914		0.0160845		0.0257807		0.00149326	0.00113485	0.000321588
169.05	C8H8O4H	unknown	0.0221957	0.0209019	0.0129681	0.00505631	0.0384471	0.0558818	0.0140075	0.00813778	0.0217575	0.0150509	0.00328013	0.000629708	0.0159062		0.00201741	0.000431285	0.00222081	0.000628889	0.000559363	0.000180198	0.0007057	3.37135e-05	0.000577787	9.40534e-05	0.000440214	0.000175705	0.000987117	0.000277893	0.00867793		0.0045104		0.00926765		0.00966965		0.00212157	0.00170928	0.000642458
169.065	C12H9O	unknown	0.0116485	0.00555737	0.0110917	0.00425385	0.013008	0.00785638	0.0135086	0.00991845	0.00963906	0.00542328	0.00144991	0.000120707	0.00648682		0.000932605	2.94838e-05	0.00107844	0.000426332	0.000221819	8.0918e-05	0.000242705	3.43899e-05	0.000217798	2.38489e-05	0.000141874	3.82734e-05	0.000766651	0.000660369	0.00559346		0.00382961		0.00479758		0.028379		0.000178556	0.000112437	8.42394e-05
169.086	C9H12O3H	unknown	0.0140153	0.00546297	0.0129882	0.00521995	0.0127631	0.00828044	0.0265717	0.0199325	0.0239207	0.0180547	0.014701	0.00476454	0.0693738		0.00489949	0.000358348	0.00604334	0.00186848	0.0029541	0.000663553	0.00406697	0.00135136	0.00311062	0.00145617	0.00231658	0.000904124	0.00435541	0.000719449	0.0413423		0.013676		0.0262056		0.0237351		0.00765205	0.00746416	0.00263212
169.105	C10H16SH	unknown	0.0108824	0.00791706	0.0118198	0.00701555	0.0112481	0.00940805	0.019534	0.019905	0.0111767	0.00834372	0.00448768	0.00112793	0.0120288		0.0103124	0.00348656	0.010752	0.0039828	0.0038954	0.00129336	0.00411727	0.00079073	0.00557424	0.00139316	0.0049399	0.0013275	0.00606988	0.00250837	0.0168528		0.00599168		0.00901287		0.0107399		0.00456878	0.00328241	0.00314665
169.122	C10H16O2H	unknown	0.00735409	0.00403576	0.00883441	0.00421253	0.00831945	0.00417872	0.0204887	0.0179102	0.00963925	0.00587408	0.0138158	0.00253849	0.025088		0.00679189	0.000924171	0.0220916	0.000354868	0.0242656	0.00512139	0.0297358	0.00550889	0.0182565	0.00357524	0.0109593	0.00175997	0.011298	0.00247185	0.122045		0.0352293		0.020338		0.12222		0.0630223	0.0463333	0.00292062
169.159	C11H20OH	unknown	0.00339482	0.00119294	0.00489595	0.00178998	0.00356564	0.00230522	0.00685943	0.00619888	0.00679631	0.0057953	0.00641702	0.00190411	0.0120669		0.00805982	0.00221756	0.0085486	0.00572741	0.00254397	0.00143444	0.00318897	0.00092858	0.00130876	7.57413e-05	0.00109001	0.000584842	0.00195139	0.00106241	0.0138521		0.00407831		0.0153656		0.0203137		0.00058878	0.000181243	0.00105929
169.195	C12H24H	unknown	0.00202485	0.00130767	0.00248	0.000976821	0.00189547	0.0012129	0.00619534	0.00456363	0.00429512	0.0038797	0.00963394	0.00231482	0.0220512		0.00718048	0.00153633	0.0101725	0.00678557	0.000199953	2.14835e-05	0.000212539	1.79401e-06	0.000232501	0.000187432	0.000174437	3.39132e-05	0.000748068	0.000597962	0.00787636		0.00420531		0.00678629		0.0125474		0.000105876	6.0401e-05	0.000439421
170.081	C8H11NO3H	unknown	0.000689441	0.000464621	0.000753064	0.000288797	0.000616184	0.000414731	0.00213907	0.00247795	0.00241043	0.00231804	0.00420679	0.000710975	0.0126591		0.00266743	0.000674693	0.00243464	0.000839884	0.000739097	0.000345796	0.000643688	8.57133e-05	0.000817752	0.000349281	0.000636179	0.000304149	0.00167041	0.000778021	0.014505		0.00391967		0.0132563		0.0155476		0.00235226	0.00201829	0.000462687
[truncated: 122 more rows]

## Sheet: NO+CIMS IDs
NO+ CIMS significant ions and ion mass identifications
This list includes the top 100 carbon-containing ion masses (by instrument signal) observed in stack burns.
Exact m/z	Ion formula	NMOG contributor	ID from…
[truncated: 101 more rows]

## Sheet: OH rate constants
Rate constants with OH radical
[truncated: 158 more rows]

[truncated: 5 more sheets: Literature review, GC-CIMS measurements, Intercomparisons, Time-series correlation, Sensitivities of noID compounds]
