# Supplementary material for: Non-methane organic gas emissions from biomass burning:identification, quantification, and emission factors from PTR-ToF during the FIREX 2016 laboratory experiment
Source: Copernicus journal article supplement (doi:10.5194/acp-2017-924), 2017-10-17
Supplement: Supplementary file 2 [file acp-2017-924-supplement.zip]

Archive with 2 entries (2 files):
- supplement submit preDiscussion revised/ACP_2017_924 SI.pdf
- supplement submit preDiscussion revised/Table S1.xlsx
